# Supplementary material for: Integrative Functional Genomics Analysis of Kaposi Sarcoma Cohorts
Source: Research Square preprint supplement (doi:10.21203/rs.3.rs-6146471/v1), 2025-03-11
Supplement: Supplementary file 1 [file 128cb3411e2054d9dab534b6.xlsx]

## Sheet: Index
	Differential KSHV gene expression analysis
Sheet	Comparison
1	Cluster 3 vs Cluster 1
2	Cluster 4 vs Cluster 1
3	Cluster 4 vs Cluster 3

## Sheet: 1-C3vsC1
Gene	log2FoldChange	pvalue	padj
K1	3.5199	0.00596131	0.0241291
K14	3.31932	1.61361e-05	0.000124688
ORF72	3.30096	1.29358e-08	7.3758e-07
K15	2.96683	1.10264e-05	9.37245e-05
ORF74	2.87234	6.77463e-07	9.59739e-06
ORF2	2.81156	1.37366e-06	1.66801e-05
ORF4	2.72232	0.000192327	0.00108985
K13	2.58949	8.39236e-08	1.4267e-06
ORF75	2.54473	8.96576e-06	8.46766e-05
K2	2.46657	8.95899e-05	0.000543939
K12	2.29819	3.30998e-05	0.000234457
LANA	2.19815	4.18605e-06	4.44768e-05
ORF8	1.89008	0.00251234	0.0118638
ORF11	1.6623	0.000966105	0.00513244
ORF10	1.28323	0.0075804	0.0292879
K6	-1.70066	0.00333013	0.0148979
K4_1	-2.11883	0.00113056	0.00565278
ORF18	-2.37165	0.0053403	0.0226963
ORF70	-2.97332	6.33452e-05	0.00041418
ORF19	-3.51926	3.47096e-08	7.3758e-07
ORF17	-3.58822	2.0676e-08	7.3758e-07
ORF16	-4.31969	2.67705e-08	7.3758e-07
ORF26	-1.20452	0.0145738	0.0538598
ORF67	0.834978	0.0185811	0.0658082
ORF68	0.917094	0.0260947	0.0887218
ORF62	1.06192	0.0349781	0.114351
ORF27	-0.970143	0.0449313	0.14145
ORF38	-1.15771	0.0565467	0.168713
K5	1.13559	0.0575611	0.168713
ORF55	-0.87784	0.0699293	0.198133
ORF29	-0.680246	0.0972302	0.265364
vIRF_2	0.730154	0.102944	0.265364
ORF44	0.628471	0.103024	0.265364
vIRF_3	0.717475	0.107031	0.267576
ORF39	-0.705366	0.11342	0.27545
ORF6	0.769675	0.118824	0.280556
ORF69	0.546282	0.145547	0.334364
ORF9	0.617673	0.157849	0.353083
ORF49	0.521207	0.167476	0.353467
K7	-0.69209	0.170395	0.353467
ORF61	0.456432	0.171676	0.353467
K4	-0.845533	0.176499	0.353467
K3	-0.85158	0.180575	0.353467
ORF7	0.699025	0.182971	0.353467
ORF57	-0.543185	0.192221	0.363083
ORF22	-0.583862	0.207203	0.382875
ORF63	0.640776	0.236759	0.428182
ORF66	0.40761	0.254773	0.451161
ORF43	-0.515935	0.260558	0.451989
ORF67A	0.487344	0.292424	0.488311
ORF36	-0.465262	0.292987	0.488311
ORF23	-0.514038	0.304217	0.497278
ORF31	-0.495227	0.311419	0.499446
ORF50	0.318936	0.319192	0.502431
ORF65	0.368672	0.332478	0.507152
ORF53	-0.478668	0.334124	0.507152
vIRF_1	-0.359377	0.341041	0.50857
ORF37	-0.39672	0.347885	0.509832
ORF20	0.599662	0.358399	0.512733
ORF21	0.448619	0.361929	0.512733
K4_2	0.576749	0.399049	0.556052
ORF58	-0.312948	0.43244	0.58811
K8_1	-0.285827	0.441689	0.58811
ORF60	0.251217	0.442812	0.58811
ORF64	0.307091	0.459331	0.600664
ORF45	-0.206362	0.472042	0.607933
ORF32	-0.259189	0.519459	0.650765
ORF40	-0.225328	0.522937	0.650765
ORF59	-0.227289	0.528852	0.650765
ORF42	-0.265545	0.535924	0.650765
ORF33	-0.279663	0.560283	0.670761
ORF30	-0.303868	0.62908	0.734172
ORF54	-0.194155	0.630524	0.734172
ORF47	0.157454	0.667951	0.76724
ORF48	0.148945	0.679558	0.770165
ORF24	-0.210018	0.729023	0.815354
vIRF_4	-0.10824	0.773111	0.853434
ORF46	-0.0829097	0.787403	0.858067
ORF52	-0.106354	0.817004	0.879055
ORF34	-0.130274	0.828546	0.880331
ORF28	0.122088	0.869758	0.912709
ORF35	0.0614875	0.894885	0.927625
ORF25	-0.0290688	0.946981	0.9698
ORF56	0.0186744	0.961004	0.972445
K8	-0.00777694	0.985841	0.985841

## Sheet: 2-C4vsC1
Gene	log2FoldChange	pvalue	padj
K15	4.43001	7.5281e-11	6.39888e-09
ORF72	3.35058	7.44929e-10	3.16595e-08
ORF75	3.00019	4.30614e-08	1.22007e-06
K5	2.38045	7.29672e-05	0.000705317
K12	2.18955	2.31818e-05	0.000281493
ORF2	2.08785	0.000106637	0.000906415
K13	1.98306	8.18069e-06	0.000139072
K2	1.90293	0.00100362	0.00710897
ORF74	1.74965	0.00109124	0.00713501
ORF63	1.6865	0.00536037	0.020546
ORF62	1.47935	0.0103253	0.0351061
ORF64	1.36552	0.00223014	0.0105666
vIRF_2	1.30918	0.0055595	0.020546
vIRF_3	1.28419	0.00514778	0.020546
ORF61	1.25183	0.000506163	0.00391126
ORF67	1.21904	0.00164647	0.00933001
ORF60	1.14194	0.00210513	0.0105666
ORF50	-0.772336	0.0132114	0.0431913
ORF23	-1.26239	0.00973773	0.0344878
ORF22	-1.76503	7.46807e-05	0.000705317
K3	-1.77009	0.00466262	0.0198161
ORF38	-1.82796	0.00145056	0.00880698
ORF19	-2.01705	0.00223763	0.0105666
ORF70	-2.10322	0.0034225	0.0153112
ORF26	-2.13708	1.23765e-05	0.000175334
ORF27	-2.21793	2.82866e-06	6.0109e-05
vIRF_4	0.93425	0.0198548	0.0625059
ORF49	-0.817589	0.0229136	0.068998
ORF29	-0.966767	0.0235405	0.068998
ORF54	1.05434	0.0247639	0.0701643
K4_2	1.57359	0.0264304	0.0724705
ORF52	-0.988405	0.0291053	0.0773108
ORF68	0.906294	0.0318847	0.0817791
ORF17	-1.35888	0.0327116	0.0817791
ORF36	-0.899537	0.0351769	0.0854296
ORF42	-0.883896	0.0436845	0.103144
K4_1	-1.30392	0.0493193	0.112695
K6	-1.15805	0.0503812	0.112695
ORF33	-0.886884	0.0642869	0.140112
K8_1	-0.658534	0.0698462	0.148423
ORF44	0.720738	0.0734475	0.152269
ORF35	-0.796809	0.0826225	0.167212
ORF11	0.753777	0.107134	0.211777
ORF66	0.591373	0.110641	0.213739
K14	1.05468	0.113672	0.214714
ORF21	-0.738407	0.12137	0.22427
ORF56	0.689065	0.130352	0.235743
ORF37	-0.614	0.141672	0.250878
ORF16	-1.08508	0.154699	0.268355
ORF34	0.866693	0.196505	0.33389
K4	-0.775033	0.204216	0.33389
ORF45	-0.36225	0.204262	0.33389
ORF39	-0.595119	0.221768	0.355666
LANA	0.528279	0.227415	0.357968
ORF57	-0.443976	0.276607	0.427483
ORF24	-0.619525	0.294929	0.441968
ORF53	-0.611244	0.296379	0.441968
ORF8	0.564141	0.339048	0.49688
ORF10	0.377778	0.407054	0.586434
ORF32	-0.334918	0.430264	0.609541
ORF69	0.290547	0.439525	0.612453
ORF31	-0.407802	0.471029	0.645765
ORF43	-0.312357	0.520589	0.702382
vIRF_1	0.275126	0.532818	0.707649
ORF7	-0.292973	0.556628	0.727899
K8	-0.24141	0.570772	0.735085
ORF18	0.469776	0.618118	0.78418
ORF58	-0.181286	0.642639	0.803299
ORF67A	-0.212228	0.653595	0.805153
ORF55	-0.249671	0.680672	0.82653
ORF4	0.246579	0.693887	0.827734
ORF28	0.220271	0.703754	0.827734
ORF48	-0.129134	0.721304	0.827734
ORF59	0.122241	0.7354	0.827734
ORF30	-0.270192	0.741531	0.827734
ORF25	-0.148714	0.743357	0.827734
K1	0.330595	0.74983	0.827734
K7	0.140864	0.773346	0.842749
ORF46	-0.0854493	0.78758	0.847396
ORF20	-0.16197	0.802477	0.852632
ORF9	0.0625166	0.884201	0.927865
ORF40	-0.0471665	0.899287	0.932188
ORF47	-0.0250559	0.955144	0.978159
ORF6	0.0110973	0.981642	0.993328
ORF65	0.000447887	0.99961	0.99961

## Sheet: 3-C4vsC3
Gene	logFC	pvalue	padj
ORF16	3.23461	0.0001463	0.0124355
ORF18	2.84143	0.0022333	0.0271187
ORF17	2.22933	0.000935468	0.01727
ORF50	-1.09127	0.00145642	0.0206326
ORF49	-1.3388	0.00101588	0.01727
LANA	-1.66987	0.000517239	0.01727
K14	-2.26464	0.00338818	0.0359995
ORF4	-2.47574	0.000728473	0.01727
K1	-3.18931	0.0123835	0.10253
ORF54	1.2485	0.0131875	0.10253
vIRF_4	1.04249	0.0132686	0.10253
ORF27	-1.24779	0.0155367	0.108584
ORF22	-1.18117	0.016607	0.108584
K15	1.46318	0.0197444	0.119877
ORF64	1.05843	0.0230745	0.124207
ORF60	0.890718	0.0234546	0.124207
ORF19	1.50221	0.0248414	0.124207
ORF21	-1.18703	0.0321261	0.151707
ORF61	0.795402	0.0358545	0.160402
K5	1.24486	0.0392627	0.166866
ORF8	-1.32594	0.0429189	0.173719
ORF74	-1.12269	0.0536776	0.207391
ORF10	-0.905453	0.069724	0.247173
ORF11	-0.908522	0.0710999	0.247173
ORF7	-0.991998	0.0726981	0.247173
ORF52	-0.882051	0.0775563	0.253549
ORF26	-0.93256	0.0816431	0.257025
ORF35	-0.858297	0.0977337	0.292023
ORF63	1.04572	0.0996315	0.292023
K7	0.832954	0.107805	0.305447
ORF6	-0.758578	0.140603	0.385525
K3	-0.918511	0.160242	0.404029
ORF23	-0.74835	0.162342	0.404029
ORF56	0.670391	0.169546	0.404029
ORF34	0.996967	0.169624	0.404029
K4_2	0.996838	0.171118	0.404029
vIRF_1	0.634503	0.180631	0.404357
ORF67A	-0.699572	0.181698	0.404357
K13	-0.606426	0.185529	0.404357
ORF42	-0.618351	0.197709	0.415364
ORF2	-0.723705	0.200352	0.415364
ORF9	-0.555156	0.226524	0.446133
ORF70	0.870104	0.2354	0.446133
vIRF_3	0.566719	0.24127	0.446133
K4_1	0.814907	0.241488	0.446133
ORF33	-0.607221	0.245494	0.446133
vIRF_2	0.579029	0.246685	0.446133
ORF55	0.628169	0.296118	0.516865
ORF38	-0.670245	0.297957	0.516865
ORF20	-0.761632	0.332808	0.5563
K8_1	-0.372707	0.342519	0.5563
K2	-0.563639	0.344015	0.5563
ORF36	-0.434275	0.353261	0.5563
ORF67	0.384066	0.353414	0.5563
ORF59	0.34953	0.363029	0.561044
ORF65	-0.368224	0.375687	0.5677
K6	0.542611	0.380693	0.5677
ORF75	0.455454	0.392899	0.5758
ORF48	-0.278079	0.489511	0.693786
ORF62	0.417434	0.489731	0.693786
ORF24	-0.409507	0.522616	0.721073
ORF69	-0.255735	0.525959	0.721073
ORF29	-0.286521	0.540462	0.729195
K8	-0.233633	0.607921	0.801846
ORF45	-0.155887	0.613176	0.801846
ORF37	-0.21728	0.626777	0.807213
ORF66	0.183763	0.64299	0.815733
ORF40	0.178161	0.662986	0.828733
ORF47	-0.18251	0.679778	0.837408
ORF43	0.203578	0.694819	0.843708
ORF58	0.131662	0.753296	0.901834
ORF25	-0.119645	0.808148	0.920204
ORF57	0.0992089	0.820106	0.920204
ORF28	0.0981829	0.820773	0.920204
ORF39	0.110247	0.82735	0.920204
K12	-0.108647	0.835562	0.920204
ORF44	0.0922669	0.836679	0.920204
ORF53	-0.132576	0.844423	0.920204
ORF32	-0.0757299	0.869927	0.92905
ORF31	0.0874252	0.8744	0.92905
K4	0.0704994	0.912492	0.957554
ORF72	0.0496235	0.924498	0.958321
ORF30	0.0336761	0.941592	0.964281
ORF68	-0.0108006	0.981267	0.992949
ORF46	-0.00253965	0.993142	0.993142
