# Supplementary material for: Integrative Functional Genomics Analysis of Kaposi Sarcoma Cohorts
Source: Research Square preprint supplement (doi:10.21203/rs.3.rs-6146471/v1), 2025-03-11
Supplement: Supplementary file 2 [file 141eb9db4f14d7da9d85f60e.docx]

**Supplementary Data 1: Cluster comparison across cohorts and clinical variables.**

**Comparison of Clusters by Origin**

| Origin

Cluster | endemic | epidemic | Row Total |

-------------|-----------|-----------|-----------|

C1 | 15 | 19 | 34 |

| 6.375 | 27.625 | |

| 11.669 | 2.693 | |

| 44.118% | 55.882% | 26.562% |

| 62.500% | 18.269% | |

-------------|-----------|-----------|-----------|

C2 | 6 | 29 | 35 |

| 6.562 | 28.438 | |

| 0.048 | 0.011 | |

| 17.143% | 82.857% | 27.344% |

| 25.000% | 27.885% | |

-------------|-----------|-----------|-----------|

C3 | 3 | 24 | 27 |

| 5.062 | 21.938 | |

| 0.840 | 0.194 | |

| 11.111% | 88.889% | 21.094% |

| 12.500% | 23.077% | |

-------------|-----------|-----------|-----------|

C4 | 0 | 32 | 32 |

| 6.000 | 26.000 | |

| 6.000 | 1.385 | |

| 0.000% | 100.000% | 25.000% |

| 0.000% | 30.769% | |

-------------|-----------|-----------|-----------|

Column Total | 24 | 104 | 128 |

| 18.750% | 81.250% | |

-------------|-----------|-----------|-----------|

Pearson's Chi-squared test

------------------------------------------------------------

Chi^2 = 22.84014 d.f. = 3 p = 4.360295e-05

Fisher's Exact Test for Count Data

------------------------------------------------------------

Alternative hypothesis: two.sided

p = 1.998457e-05

**Comparison of Cluster of Lesions by HIV status**

| HIV

Cluster_lesions | No | Yes | Row Total |

---------------------|-----------|-----------|-----------|

C1 | 4 | 30 | 34 |

| 2.194 | 31.806 | |

| 1.488 | 0.103 | |

| 11.765% | 88.235% | 36.559% |

| 66.667% | 34.483% | |

---------------------|-----------|-----------|-----------|

C3 | 2 | 25 | 27 |

| 1.742 | 25.258 | |

| 0.038 | 0.003 | |

| 7.407% | 92.593% | 29.032% |

| 33.333% | 28.736% | |

---------------------|-----------|-----------|-----------|

C4 | 0 | 32 | 32 |

| 2.065 | 29.935 | |

| 2.065 | 0.142 | |

| 0.000% | 100.000% | 34.409% |

| 0.000% | 36.782% | |

---------------------|-----------|-----------|-----------|

Column Total | 6 | 87 | 93 |

| 6.452% | 93.548% | |

---------------------|-----------|-----------|-----------|

Pearson's Chi-squared test

------------------------------------------------------------

Chi^2 = 3.838029 d.f. = 2 p = 0.1467515

Fisher's Exact Test for Count Data

------------------------------------------------------------

Alternative hypothesis: two.sided

p = 0.1292689

**Comparison of Cluster of Lesions by ART**

| ART

Cluster_lesions | No | Yes | Row Total |

---------------------|-----------|-----------|-----------|

C1 | 29 | 5 | 34 |

| 25.957 | 8.043 | |

| 0.357 | 1.151 | |

| 85.294% | 14.706% | 36.559% |

| 40.845% | 22.727% | |

---------------------|-----------|-----------|-----------|

C3 | 17 | 10 | 27 |

| 20.613 | 6.387 | |

| 0.633 | 2.044 | |

| 62.963% | 37.037% | 29.032% |

| 23.944% | 45.455% | |

---------------------|-----------|-----------|-----------|

C4 | 25 | 7 | 32 |

| 24.430 | 7.570 | |

| 0.013 | 0.043 | |

| 78.125% | 21.875% | 34.409% |

| 35.211% | 31.818% | |

---------------------|-----------|-----------|-----------|

Column Total | 71 | 22 | 93 |

| 76.344% | 23.656% | |

---------------------|-----------|-----------|-----------|

Pearson's Chi-squared test

------------------------------------------------------------

Chi^2 = 4.241148 d.f. = 2 p = 0.1199627

Fisher's Exact Test for Count Data

------------------------------------------------------------

Alternative hypothesis: two.sided

p = 0.1204854

**Comparison of Cluster of Lesions by Morphotype**

Morphotype

Cluster_lesions Fungating Macular Nodular Patch Plaque Tota|

---------------------|-----------|-----------|-----------|-----------|---------|-----|

C1 | 1 | 3 | 11 | 1 | 3 | 19 |

| 0.905 | 6.635 | 7.540 | 0.302 | 3.619 | |

| 0.010 | 1.991 | 1.588 | 1.617 | 0.106 | |

| 5.263% | 15.789% | 57.895% | 5.263% | 15.789% |30.1%|

| 33.333% | 13.636% | 44.000% | 100.000% | 25.000% | |

---------------------|-----------|-----------|-----------|-----------|---------|-----|

C3 | 0 | 6 | 8 | 0 | 8 | 22 |

| 1.048 | 7.683 | 8.730 | 0.349 | 4.190 | |

| 1.048 | 0.368 | 0.061 | 0.349 | 3.463 | |

| 0.000% | 27.273% | 36.364% | 0.000% | 36.364% |34.9%|

| 0.000% | 27.273% | 32.000% | 0.000% | 66.667% | |

---------------------|-----------|-----------|-----------|-----------|---------|-----|

C4 | 2 | 13 | 6 | 0 | 1 | 22 |

| 1.048 | 7.683 | 8.730 | 0.349 | 4.190 | |

| 0.866 | 3.680 | 0.854 | 0.349 | 2.429 | |

| 9.091% | 59.091% | 27.273% | 0.000% | 4.545% |34.9%|

| 66.667% | 59.091% | 24.000% | 0.000% | 8.333% | |

---------------------|-----------|-----------|-----------|-----------|---------|-----|

Column Total | 3 | 22 | 25 | 1 | 12 | 63 |

| 4.762% | 34.921% | 39.683% | 1.587% | 19.048% | |

---------------------|-----------|-----------|-----------|-----------|---------|-----|

Pearson's Chi-squared test

------------------------------------------------------------

Chi^2 = 18.78075 d.f. = 8 p = 0.01607721

Fisher's Exact Test for Count Data

------------------------------------------------------------

Alternative hypothesis: two.sided

p = 0.007681957
