# Supplementary material for: Integrative Functional Genomics Analysis of Kaposi Sarcoma Cohorts
Source: Research Square preprint supplement (doi:10.21203/rs.3.rs-6146471/v1), 2025-03-11
Supplement: Supplementary file 3 [file 498444102faf0d2105f0bcfb.xlsx]

## Sheet: Index
	Differential gene expression analysis
Sheet	Comparison
1	Cluster 2 vs Cluster 1
2	Cluster 3 vs Cluster 1
3	Cluster 4 vs Cluster 1
4	Cluster 2 vs Cluster 3
5	Cluster 2 vs Cluster 4
6	Cluster 3 vs Cluster 4

## Sheet: 1-C2vsC1
	entrez	log2FoldChange	pvalue	padj
K15	HHV8GK18_gp85	7.43657	2.13188e-22	1.80931e-21
CACNG5	27091	7.23052	1.42212e-15	7.8852e-15
ORF75	HHV8GK18_gp86	7.18786	7.49902e-26	7.84245e-25
K5	HHV8GK18_gp16	7.09378	3.44672e-21	2.70232e-20
DMP1	1758	6.87258	3.41216e-17	2.09304e-16
vIRF-3	HHV8GK18_gp64	6.83923	1.47639e-22	1.26685e-21
ORF72	HHV8GK18_gp82	6.79365	3.76943e-27	4.21932e-26
IBSP	3381	6.62764	1.90303e-18	1.25993e-17
K13	HHV8GK18_gp80	6.51042	8.68474e-30	1.11819e-28
MMP12	4321	6.50861	1.02719e-25	1.0651e-24
vIRF-2	HHV8GK18_gp65	6.30372	3.47887e-20	2.56505e-19
vIRF-4	HHV8GK18_gp63	6.30287	8.11271e-22	6.62409e-21
ORF74	HHV8GK18_gp84	6.2528	4.76404e-26	5.04397e-25
K2	HHV8GK18_gp10	6.21182	5.51158e-19	3.78093e-18
K12	HHV8GK18_gp79	6.20133	7.48714e-20	5.40839e-19
ORF11	HHV8GK18_gp08	6.19058	4.75058e-22	3.94809e-21
K8.1	HHV8GK18_gp55	6.14503	1.25004e-22	1.07768e-21
COL22A1	169044	6.14318	7.95837e-33	1.20514e-31
LINC01583	101929690	6.04261	7.74184e-30	9.97794e-29
ORF64	HHV8GK18_gp72	6.02427	8.19663e-20	5.90511e-19
ORF44	HHV8GK18_gp47	5.93669	3.2712e-21	2.56785e-20
ORF61	HHV8GK18_gp66	5.91774	2.16997e-19	1.52409e-18
ORF68	HHV8GK18_gp77	5.89097	4.54702e-23	4.03966e-22
K3	HHV8GK18_gp11	5.86991	1.21678e-14	6.32254e-14
ORF57	HHV8GK18_gp61	5.86499	2.31292e-19	1.62138e-18
ORF6	HHV8GK18_gp03	5.85575	5.0439e-18	3.26021e-17
ORF60	HHV8GK18_gp67	5.80634	1.02945e-20	7.81991e-20
K8	HHV8GK18_gp54	5.79988	2.11363e-17	1.31349e-16
ORF63	HHV8GK18_gp71	5.79221	4.60197e-13	2.12876e-12
LINC02685	221122	5.7527	2.83674e-12	1.23652e-11
IQCA1	79781	5.75065	5.04134e-45	1.3289e-43
ORF2	HHV8GK18_gp09	5.74787	1.89875e-22	1.61842e-21
ESM1	11082	5.68809	2.90218e-24	2.74897e-23
ORF67	HHV8GK18_gp74	5.67899	7.00576e-23	6.16209e-22
ORF58	HHV8GK18_gp68	5.64961	3.45419e-17	2.11831e-16
ORF48	HHV8GK18_gp48	5.61867	7.14109e-23	6.27251e-22
ORF50	HHV8GK18_gp52	5.61242	1.1452e-31	1.61309e-30
ORF24	HHV8GK18_gp27	5.57355	2.81324e-09	9.62617e-09
ORF49	HHV8GK18_gp53	5.54362	4.84622e-22	4.02495e-21
ALPG	251	5.53474	7.30967e-18	4.6752e-17
TMEM235	283999	5.52875	9.47365e-27	1.03688e-25
ECEL1P2	347694	5.5268	3.04455e-19	2.11919e-18
ORF10	HHV8GK18_gp07	5.50476	2.63686e-18	1.73279e-17
ORF65	HHV8GK18_gp76	5.44389	1.70207e-18	1.13069e-17
ORF4	HHV8GK18_gp02	5.4396	8.88875e-13	4.02594e-12
GRM8	2918	5.42059	6.66303e-28	7.77768e-27
CLEC4M	10332	5.40549	2.63465e-20	1.95837e-19
ORF39	HHV8GK18_gp43	5.35056	9.19028e-14	4.47498e-13
ORF69	HHV8GK18_gp78	5.34955	2.81541e-20	2.08962e-19
K7	HHV8GK18_gp18	5.30582	1.08745e-14	5.66657e-14
K4.2	HHV8GK18_gp14	5.29054	3.49293e-10	1.29385e-09
ORF59	HHV8GK18_gp70	5.27087	9.33869e-17	5.56844e-16
K4	HHV8GK18_gp13	5.25461	1.86163e-09	6.46411e-09
LY6H	4062	5.25319	9.76493e-21	7.43306e-20
IL13RA2	3598	5.18002	4.59226e-25	4.58904e-24
K14	HHV8GK18_gp83	5.15446	3.46474e-13	1.61789e-12
ORF46	HHV8GK18_gp50	5.15017	1.7285e-21	1.37882e-20
ZP2	7783	5.14788	5.47562e-25	5.43784e-24
ACAN	176	5.12949	1.53042e-31	2.12958e-30
ORF62	HHV8GK18_gp69	5.12535	1.23841e-12	5.5502e-12
ORF36	HHV8GK18_gp40	5.11513	5.00734e-12	2.14223e-11
NOS2	4843	5.1129	5.50808e-44	1.3782e-42
ORF40	HHV8GK18_gp44	5.11143	2.6673e-16	1.54654e-15
SPIC	121599	5.0745	1.6009e-21	1.28182e-20
LRRC3B	116135	5.04038	4.42466e-22	3.68319e-21
ORF37	HHV8GK18_gp41	5.02608	9.84993e-15	5.14421e-14
ORF47	HHV8GK18_gp49	5.00356	6.22434e-18	3.99599e-17
KCNF1	3754	5.00347	7.94855e-34	1.26496e-32
ORF66	HHV8GK18_gp75	5.00307	8.36744e-18	5.32779e-17
ORF7	HHV8GK18_gp04	4.99636	1.63528e-13	7.81554e-13
STC1	6781	4.96275	1.9076e-38	3.72251e-37
CEMIP	57214	4.95018	2.58695e-37	4.82407e-36
K6	HHV8GK18_gp17	4.93901	1.46845e-09	5.14139e-09
ORF43	HHV8GK18_gp45	4.92489	1.19694e-11	4.96327e-11
HMHB1	57824	4.91352	7.4166e-25	7.2752e-24
MMP9	4318	4.9128	2.16083e-36	3.88525e-35
PCDH17	27253	4.89244	2.04204e-42	4.75646e-41
ORF45	HHV8GK18_gp51	4.89222	3.44985e-18	2.2526e-17
ORF54	HHV8GK18_gp58	4.87738	4.35146e-11	1.72946e-10
LOXHD1	125336	4.87711	6.45235e-54	2.55916e-52
LCN1	3933	4.87109	9.12394e-18	5.80227e-17
MAGEA4	4103	4.84394	1.17128e-07	3.47987e-07
UNC5A	90249	4.82256	2.27401e-44	5.78022e-43
MMP1	4312	4.81707	1.18907e-19	8.48885e-19
ORF56	HHV8GK18_gp60	4.78914	2.99238e-13	1.40217e-12
MIR503	574506	4.78838	1.31313e-24	1.27106e-23
LINC01085	152742	4.78726	2.97264e-34	4.83587e-33
ORF33	HHV8GK18_gp37	4.77177	2.59781e-10	9.71126e-10
TMEM233	387890	4.64429	3.06964e-49	9.90559e-48
MDS2	259283	4.63069	7.04277e-27	7.76462e-26
ORF8	HHV8GK18_gp05	4.61505	8.81712e-11	3.42707e-10
CNTNAP5	129684	4.60316	6.32501e-14	3.11593e-13
ORF52	HHV8GK18_gp56	4.59761	8.45967e-10	3.03406e-09
CFAP54	144535	4.57893	1.11876e-39	2.29871e-38
ORF42	HHV8GK18_gp46	4.56273	2.44192e-11	9.8764e-11
CHRNA7	1139	4.56179	7.21576e-40	1.4946e-38
ORF25	HHV8GK18_gp29	4.55609	8.57534e-10	3.0734e-09
ALPP	250	4.54867	8.4875e-15	4.45903e-14
CREG2	200407	4.53287	1.02562e-28	1.24601e-27
ORF29	HHV8GK18_gp33	4.45603	1.74509e-11	7.14719e-11
K4.1	HHV8GK18_gp15	4.43559	2.62074e-07	7.54393e-07
PPEF1	5475	4.42701	1.84344e-34	3.03552e-33
KCNQ3	3786	4.42174	8.64288e-52	3.11022e-50
TDO2	6999	4.41036	8.56513e-26	8.92096e-25
LINC02475	100506827	4.39344	6.85001e-08	2.07239e-07
PROX1	5629	4.38525	3.09715e-44	7.83367e-43
SPTA1	6708	4.31597	1.68961e-30	2.25123e-29
EPYC	1833	4.31281	1.71805e-10	6.52262e-10
CLDN14	23562	4.29775	5.64985e-26	5.95233e-25
STATH	6779	4.2913	1.87921e-05	4.50159e-05
HTN3	3347	4.27321	9.08669e-06	2.24968e-05
VAT1L	57687	4.26818	9.92484e-18	6.30065e-17
MYLK2	85366	4.25591	6.58947e-33	1.00318e-31
FFAR3	2865	4.246	1.43065e-20	1.07843e-19
vIRF-1	HHV8GK18_gp62	4.24188	4.47583e-11	1.77798e-10
GPRIN3	285513	4.22729	1.13231e-49	3.73868e-48
NRXN3	9369	4.21226	3.64959e-52	1.33968e-50
PTCHD4	442213	4.2035	1.07289e-29	1.37379e-28
LINC01558	26238	4.20269	1.38193e-47	4.10289e-46
ORF27	HHV8GK18_gp31	4.19927	1.01967e-09	3.62863e-09
SIGLEC12	89858	4.19296	1.97593e-22	1.68197e-21
DSCAM	1826	4.19278	4.75327e-10	1.73785e-09
GRAPL	400581	4.18639	3.63332e-49	1.16658e-47
ORF9	HHV8GK18_gp06	4.17451	2.05583e-12	9.05216e-12
FILIP1	27145	4.16477	1.05492e-46	2.98994e-45
ORF67A	HHV8GK18_gp73	4.15711	3.77677e-10	1.39375e-09
ORF34	HHV8GK18_gp38	4.13485	7.10089e-06	1.7797e-05
MMP13	4322	4.09646	4.84405e-20	3.53602e-19
FLT4	2324	4.06772	1.01297e-47	3.02146e-46
CCNYL2	414194	4.06555	2.71232e-14	1.37484e-13
CALCRL	10203	4.06467	4.97562e-38	9.54231e-37
SEMA7A	8482	4.05982	2.32669e-55	9.86993e-54
DUXAP8	503637	4.05175	1.38788e-30	1.85791e-29
ORF35	HHV8GK18_gp39	4.03484	2.42877e-07	7.0142e-07
CD5L	922	4.02904	1.52452e-13	7.30392e-13
LINC02538	401286	4.02897	1.22706e-32	1.82577e-31
PMCH	5367	4.02502	9.99497e-16	5.5842e-15
HMGA2	8091	4.00854	1.98315e-29	2.49447e-28
CYP46A1	10858	4.00433	1.44857e-45	3.9234e-44
RASGRP3	25780	3.96483	5.49468e-54	2.1861e-52
CTLA4	1493	3.95507	8.93936e-29	1.09173e-27
SCN3A	6328	3.95152	5.60215e-27	6.20841e-26
ST6GAL2	84620	3.9417	1.78094e-25	1.82599e-24
SCN9A	6335	3.93593	3.3282e-40	7.03009e-39
PRKCQ-AS1	439949	3.90739	5.03798e-42	1.15253e-40
HOATZ	399949	3.90624	3.4537e-22	2.89275e-21
ORF32	HHV8GK18_gp36	3.90506	6.13706e-08	1.86529e-07
GABRD	2563	3.88017	1.07479e-37	2.02936e-36
LANA	HHV8GK18_gp81	3.87517	6.87929e-19	4.6878e-18
MROH5	389690	3.86907	1.606e-20	1.2049e-19
KIF25-AS1	100505879	3.86539	1.077e-10	4.16088e-10
PGM2L1	283209	3.86413	5.40494e-62	3.17627e-60
OPCML	4978	3.86163	3.82181e-29	4.74201e-28
SLC26A4	5172	3.85514	1.26626e-39	2.59345e-38
LINC01648	101929406	3.8394	6.62426e-11	2.59918e-10
NFIA-AS2	100996570	3.80807	1.64526e-29	2.08584e-28
ADAM19	8728	3.78865	1.30085e-56	5.88215e-55
ORF70	HHV8GK18_gp12	3.78788	2.41825e-07	6.98618e-07
MMP11	4320	3.7871	4.10929e-37	7.61303e-36
ADAMTS7	11173	3.77654	8.44721e-50	2.82183e-48
F2RL3	9002	3.76489	3.14123e-30	4.12954e-29
KBTBD11	9920	3.75268	1.18294e-57	5.59213e-56
CHRNA1	1134	3.7502	1.87887e-15	1.0335e-14
LINC00606	285370	3.72527	9.99774e-10	3.5588e-09
TMEM26	219623	3.71951	7.54348e-29	9.2478e-28
SNCB	6620	3.71546	1.04191e-23	9.55468e-23
AGBL1	123624	3.70825	5.48146e-17	3.31632e-16
PCDH12	51294	3.707	5.75048e-50	1.93105e-48
COL4A1	1282	3.70468	4.23422e-43	1.01772e-41
THSD7A	221981	3.70022	2.65394e-45	7.09063e-44
NME1-NME2	654364	3.68233	1.42142e-09	4.98491e-09
RGS4	5999	3.67654	2.64497e-27	2.98544e-26
MEPE	56955	3.66879	0.00324572	0.00591017
NETO2	81831	3.66683	7.70106e-49	2.43902e-47
ITGA9	3680	3.66174	2.3078e-56	1.03015e-54
CHRFAM7A	89832	3.65963	5.23889e-42	1.19529e-40
NEK10	152110	3.65749	1.16867e-37	2.20175e-36
ORF26	HHV8GK18_gp30	3.65399	1.93308e-06	5.11985e-06
CHSY3	337876	3.65211	1.86805e-53	7.26301e-52
SEMA3A	10371	3.65175	4.71154e-29	5.81779e-28
CCDC26	728724	3.64577	8.65631e-10	3.10069e-09
ORF22	HHV8GK18_gp26	3.63476	4.97425e-07	1.39488e-06
EYA1	2138	3.63312	9.93066e-21	7.55473e-20
ADD2	119	3.62768	2.08481e-32	3.05589e-31
ORF21	HHV8GK18_gp25	3.62224	1.88999e-05	4.52699e-05
GRAP	10750	3.62163	1.11454e-51	3.99956e-50
ADAMTS4	9507	3.60914	6.40064e-27	7.0658e-26
LRRC38	126755	3.60245	9.12872e-12	3.82808e-11
MIR551A	693135	3.60019	9.29416e-10	3.32081e-09
ORF23	HHV8GK18_gp28	3.59739	1.5124e-06	4.0437e-06
OR4D6	219983	3.59691	4.29252e-10	1.57636e-09
RFPL1	5988	3.58643	1.66679e-06	4.43659e-06
RNASE10	338879	3.57715	4.58601e-06	1.17128e-05
CXCR4	7852	3.56574	2.03025e-31	2.80729e-30
HTN1	3346	3.5562	3.85363e-05	8.91536e-05
GRASLND	386597	3.55456	2.80197e-45	7.47055e-44
LINC01182	101929071	3.55409	8.18684e-18	5.21669e-17
H2AB3	83740	3.54312	1.81355e-12	8.01702e-12
KCNN1	3780	3.54078	1.17167e-20	8.86872e-20
NALF1	728215	3.53724	3.06641e-34	4.98209e-33
PIEZO2	63895	3.52845	4.56086e-36	8.07033e-35
BCL6B	255877	3.52135	4.27988e-60	2.27037e-58
CHST1	8534	3.52048	3.19883e-35	5.47498e-34
TMEM82	388595	3.51998	3.67859e-11	1.47063e-10
P4HA3	283208	3.51503	7.94268e-29	9.72789e-28
SOX11	6664	3.51328	6.22262e-11	2.44571e-10
GPR137C	283554	3.5131	5.32874e-45	1.40178e-43
UNC45B	146862	3.50745	2.27167e-25	2.30971e-24
GRIK3	2899	3.47174	9.61811e-24	8.84231e-23
MSANTD3-TMEFF1	100526694	3.47088	1.78078e-08	5.68068e-08
DYSF	8291	3.46189	7.66932e-53	2.91981e-51
TBXA2R	6915	3.44001	7.96333e-43	1.89273e-41
TIE1	7075	3.43092	8.62032e-58	4.11303e-56
DLL4	54567	3.43044	4.61041e-54	1.84e-52
LINC02347	100128554	3.42736	2.77734e-09	9.50714e-09
LRRN2	10446	3.40286	2.45799e-29	3.08417e-28
RET	5979	3.38817	1.64217e-48	5.12275e-47
ERFE	151176	3.37975	8.39673e-21	6.43749e-20
CLEC4G	339390	3.36847	2.14356e-12	9.42577e-12
LAYN	143903	3.3605	4.31816e-50	1.4577e-48
SPP1	6696	3.35707	1.10183e-10	4.25102e-10
F13B	2165	3.3526	1.43437e-07	4.22916e-07
HCCAT5	283902	3.35019	7.20243e-18	4.60891e-17
PALD1	27143	3.34758	1.23882e-80	1.94731e-78
OIT3	170392	3.33912	4.35261e-19	3.00034e-18
FGB	2244	3.31459	0.000116432	0.000255413
KCNK17	89822	3.31163	2.6469e-12	1.15653e-11
PRR29-AS1	400612	3.30483	1.05946e-29	1.35728e-28
LINC01502	100130954	3.30477	6.62389e-08	2.00754e-07
ORF55	HHV8GK18_gp59	3.29035	2.30333e-06	6.06162e-06
COL4A2	1284	3.28693	2.10231e-40	4.47386e-39
KCNN3	3782	3.28374	4.12073e-41	9.02406e-40
H2AB2	474381	3.28165	5.49446e-12	2.34125e-11
ZNF560	147741	3.28163	2.12542e-07	6.17151e-07
PXDN	7837	3.25228	1.45374e-39	2.97031e-38
BCAT1	586	3.24443	2.74219e-28	3.26243e-27
ANKRD18DP	348840	3.24011	3.33983e-14	1.68285e-13
SLC22A16	85413	3.23645	1.47342e-21	1.18531e-20
MAGED4	728239	3.23515	3.26466e-48	1.00057e-46
PGF	5228	3.22494	1.4505e-61	8.35161e-60
MAGED4B	81557	3.22281	8.03696e-47	2.29058e-45
TM4SF18	116441	3.2163	1.25688e-30	1.68606e-29
CACNG8	59283	3.21563	1.0231e-20	7.77626e-20
LINC01788	101927244	3.19745	5.09098e-14	2.52597e-13
SLC5A4	6527	3.18728	1.1404e-38	2.25283e-37
SALRNA2	104548973	3.18406	9.77382e-14	4.7546e-13
SV2B	9899	3.17887	3.57301e-36	6.35747e-35
VASH1	22846	3.17762	2.21919e-61	1.26356e-59
CD80	941	3.17728	7.59484e-39	1.50849e-37
SGIP1	84251	3.17545	4.09755e-38	7.88193e-37
PCSK1	5122	3.17429	2.45446e-12	1.0752e-11
MMP16	4325	3.16983	2.90919e-31	4.00749e-30
SPRR3	6707	3.16873	0.00162836	0.00309256
DYRK3	8444	3.16682	1.23888e-59	6.38684e-58
CD200	4345	3.16201	6.76715e-49	2.14855e-47
PMF1-BGLAP	100527963	3.1617	2.00032e-08	6.35253e-08
GAS2L3	283431	3.15964	6.67368e-47	1.91267e-45
FSD1	79187	3.1585	5.36285e-16	3.05349e-15
DCHS2	54798	3.14926	8.19783e-20	5.90511e-19
SV2A	9900	3.13167	2.62216e-51	9.3054e-50
DNAJC12	56521	3.12749	9.77287e-26	1.01459e-24
NID1	4811	3.12536	2.61537e-43	6.33375e-42
CFAP161	161502	3.12134	1.98465e-29	2.49512e-28
OPN5	221391	3.11937	8.32761e-12	3.50074e-11
MYBPC2	4606	3.11465	6.73353e-07	1.86314e-06
ORF31	HHV8GK18_gp35	3.11412	0.0001129	0.000248047
SCML2	10389	3.10675	1.41752e-52	5.34112e-51
TNFRSF4	7293	3.1036	4.63547e-34	7.46043e-33
DISP3	57540	3.10357	3.55349e-15	1.91558e-14
ITGA1	3672	3.0993	9.38958e-32	1.33211e-30
FCMR	9214	3.09475	3.57386e-41	7.86679e-40
GIPC3	126326	3.08772	2.5906e-45	6.93588e-44
OTOG	340990	3.07491	1.16638e-06	3.15509e-06
CHST15	51363	3.0698	5.01007e-78	6.65119e-76
STK32B	55351	3.06968	9.15441e-47	2.60616e-45
RPL17-C18orf32	100526842	3.06923	2.23253e-08	7.05412e-08
NRP2	8828	3.06421	1.59961e-49	5.23438e-48
FSCN1	6624	3.06384	7.1906e-76	8.33654e-74
IL24	11009	3.06358	1.67186e-18	1.11119e-17
GABRR2	2570	3.06279	7.32495e-35	1.23311e-33
ADGRF5	221395	3.06197	6.16447e-39	1.22915e-37
ADAMDEC1	27299	3.05935	1.70788e-20	1.27839e-19
NID2	22795	3.05454	1.27027e-36	2.30339e-35
SCN2A	6326	3.05341	5.66423e-16	3.21865e-15
ARHGAP36	158763	3.05094	1.60239e-07	4.70238e-07
ORF30	HHV8GK18_gp34	3.04793	0.00984571	0.0166524
AFAP1L1	134265	3.04471	2.84784e-47	8.32961e-46
LINC01929	101927229	3.04383	1.09209e-11	4.54469e-11
ETS1	2113	3.03178	3.89426e-62	2.30436e-60
KDR	3791	3.03113	2.16962e-48	6.72188e-47
RGS17	26575	3.02552	4.56879e-35	7.773e-34
KBTBD11-AS1	101928058	3.02406	3.98618e-13	1.85159e-12
SCN11A	11280	3.02302	1.7777e-12	7.8708e-12
LINC00839	84856	3.01744	1.39337e-47	4.13204e-46
ANGPT2	285	3.0145	2.06942e-37	3.87027e-36
DRC7	84229	3.01227	1.70502e-12	7.55945e-12
SLC6A17	388662	3.01097	8.43823e-56	3.65828e-54
FN1	2335	3.00922	1.20849e-34	2.00155e-33
GNAT3	346562	3.00412	3.2473e-08	1.01281e-07
NOVA2	4858	2.99883	3.95594e-48	1.20954e-46
PCSK6	5046	2.99562	5.47558e-63	3.33243e-61
CCDC102B	79839	2.99177	2.92803e-35	5.02491e-34
HECW2	57520	2.99065	1.63927e-62	9.85855e-61
TSPAN18	90139	2.98892	6.62221e-53	2.52868e-51
EXOC3L1	283849	2.98606	4.91646e-65	3.30628e-63
GAGE2E	729428	2.97648	0.0309869	0.0481676
KCTD16	57528	2.97068	1.16711e-11	4.84193e-11
PRDM8	56978	2.96966	1.41957e-30	1.89834e-29
FCGR3A	2214	2.96483	3.75539e-23	3.34216e-22
LYPD1	116372	2.96199	1.90789e-25	1.9499e-24
HOXD13	3239	2.96125	2.05361e-06	5.42785e-06
FMNL3	91010	2.95866	1.29733e-70	1.12298e-68
MIR3648-1	100500862	2.95703	1.15748e-05	2.83501e-05
DCDC2C	728597	2.9569	4.65207e-09	1.56056e-08
ZCCHC12	170261	2.95372	2.113e-10	7.96986e-10
LINC02408	100507175	2.95124	3.59425e-12	1.55482e-11
ST8SIA4	7903	2.94757	5.75723e-40	1.19831e-38
CDH5	1003	2.94672	7.16483e-46	1.97183e-44
CLEC6A	93978	2.94237	9.58973e-08	2.8664e-07
GPR182	11318	2.93776	3.51713e-25	3.54508e-24
TRPC4	7223	2.93098	1.18036e-22	1.01829e-21
KNL1	57082	2.92721	1.32726e-29	1.69273e-28
LINC01235	401492	2.92119	1.2814e-15	7.11883e-15
SH2D4B	387694	2.91922	1.1643e-26	1.26836e-25
ORF53	HHV8GK18_gp57	2.91785	0.000180927	0.000388871
PROB1	389333	2.90539	4.72295e-57	2.19621e-55
KCNN2	3781	2.90366	3.13502e-37	5.83761e-36
EPHX4	253152	2.90321	2.58557e-36	4.6327e-35
TNFAIP8L1	126282	2.90298	1.98802e-73	1.99753e-71
P4HA3-AS1	101928580	2.90182	9.23446e-09	3.01485e-08
MANCR	100216001	2.90056	3.67047e-12	1.58672e-11
MROH2B	133558	2.89764	7.09434e-12	2.99508e-11
CEMIP2	23670	2.89213	1.18007e-56	5.36097e-55
ALPK3	57538	2.88865	3.55717e-32	5.17557e-31
WT1	7490	2.88151	2.75157e-06	7.17419e-06
LINC01163	101927381	2.87282	3.822e-08	1.18413e-07
OLR1	4973	2.86414	4.42763e-10	1.62389e-09
SAMD14	201191	2.86236	2.33444e-41	5.20114e-40
CD93	22918	2.85034	1.37442e-49	4.5148e-48
CYP26C1	340665	2.83903	3.56129e-12	1.5416e-11
CDYL2	124359	2.83679	3.7533e-80	5.52684e-78
SH2D3C	10044	2.835	1.6011e-56	7.19707e-55
RAB39B	116442	2.83439	4.35657e-28	5.12979e-27
KCNJ10	3766	2.82773	2.07221e-20	1.54794e-19
ABCC13	150000	2.8277	0.000110171	0.000242364
MIR126	406913	2.82109	3.9446e-18	2.57107e-17
NR2F1	7025	2.8163	1.73361e-33	2.70679e-32
ADAMTS14	140766	2.81553	5.65121e-29	6.96132e-28
PTP4A3	11156	2.81471	4.1539e-38	7.98434e-37
SLC4A7	9497	2.81247	4.60405e-42	1.05609e-40
NR5A2	2494	2.8102	8.03786e-37	1.4679e-35
PCDHAC2	56134	2.80999	1.425e-14	7.35523e-14
CETP	1071	2.80988	2.09786e-34	3.43898e-33
PRKCQ	5588	2.8064	7.44006e-54	2.94181e-52
GHSR	2693	2.80423	3.85442e-05	8.9164e-05
LINC01915	729950	2.79715	1.45048e-18	9.69332e-18
LINC01993	100996291	2.79481	3.86448e-09	1.3061e-08
RPS6KA2-IT1	100874353	2.79275	5.85747e-20	4.25036e-19
ENPEP	2028	2.78928	3.01337e-29	3.75894e-28
WSCD1	23302	2.7887	6.23809e-33	9.50817e-32
LINC01060	401164	2.78805	5.13458e-09	1.71434e-08
MOBP	4336	2.78095	3.6157e-15	1.94748e-14
RCSD1	92241	2.77938	5.06763e-51	1.77623e-49
GOLGA8EP	390535	2.76807	5.10084e-10	1.86094e-09
TNFRSF10C	8794	2.76324	1.03216e-46	2.92868e-45
PDPN	10630	2.76152	1.90881e-30	2.53538e-29
GPR4	2828	2.7589	3.61401e-33	5.57484e-32
CDH26	60437	2.75864	5.52342e-46	1.52996e-44
OTOGL	283310	2.74882	3.14186e-25	3.17307e-24
BMP8A	353500	2.7473	4.26834e-40	8.97158e-39
MIR3667HG	348645	2.74237	5.22529e-31	7.1404e-30
HOXB9	3219	2.7409	2.76155e-15	1.50149e-14
NINL	22981	2.7375	2.05216e-46	5.75278e-45
LINC01775	101928602	2.73405	1.35875e-10	5.20542e-10
SALL4	57167	2.73079	1.28272e-14	6.65031e-14
ERG	2078	2.72837	2.91393e-50	9.9415e-49
ZNF730	100129543	2.72811	1.78209e-20	1.33355e-19
SPRY4	81848	2.72391	5.01512e-45	1.32335e-43
SMAD1-AS2	101927659	2.71951	7.85192e-10	2.8248e-09
LINC00642	400238	2.71898	6.02151e-05	0.000136268
TMEFF1	8577	2.71446	9.82974e-10	3.50435e-09
CD300LF	146722	2.71266	1.1281e-20	8.54899e-20
OR51E1	143503	2.71159	4.84518e-18	3.13414e-17
PRR5L	79899	2.70744	4.09971e-52	1.50061e-50
C16orf78	123970	2.70739	2.58255e-08	8.11506e-08
PPP1R16B	26051	2.70693	7.75444e-46	2.12724e-44
FER1L6	654463	2.7062	6.17799e-10	2.2421e-09
LYN	4067	2.70285	1.60375e-60	8.74281e-59
ACOD1	730249	2.69759	6.74234e-07	1.86517e-06
LINC00636	285205	2.69679	3.03562e-16	1.75335e-15
TP53I11	9537	2.69627	8.11723e-81	1.29987e-78
C3orf36	80111	2.69278	2.01534e-18	1.33188e-17
PODXL	5420	2.67805	1.91386e-49	6.2388e-48
CCDC141	285025	2.67758	5.52609e-19	3.78784e-18
RAPGEF5	9771	2.67641	1.52069e-50	5.25818e-49
MIR3117	100422871	2.67356	1.48952e-08	4.78433e-08
HEY1	23462	2.67104	3.50303e-47	1.01763e-45
UNC5B	219699	2.66928	1.50145e-56	6.77016e-55
INHBB	3625	2.66873	4.28632e-34	6.90283e-33
KLHL3	26249	2.65458	6.5538e-64	4.20856e-62
CXCL9	4283	2.6518	3.01664e-16	1.74317e-15
TMEM255B	348013	2.64934	5.53765e-43	1.3211e-41
CEACAM21	90273	2.649	1.08388e-26	1.18326e-25
MIXL1	83881	2.64855	1.04982e-11	4.37802e-11
RBM14-RBM4	100526737	2.64463	1.02571e-05	2.52724e-05
CACNA1E	777	2.64333	4.03534e-15	2.16485e-14
MYO1B	4430	2.63871	5.41623e-52	1.97403e-50
SPINK9	643394	2.63629	0.000214322	0.000457081
IPCEF1	26034	2.63587	2.15228e-50	7.4021e-49
COL18A1-AS1	378832	2.63566	7.03631e-09	2.32415e-08
TRIL	9865	2.63492	1.66268e-38	3.24953e-37
CHST7	56548	2.63345	1.59732e-41	3.59321e-40
SYT11	23208	2.6331	7.83996e-57	3.58706e-55
CCNJL	79616	2.63161	4.80278e-47	1.38422e-45
SCHIP1	29970	2.6308	1.72099e-07	5.04059e-07
CDC20B	166979	2.62709	7.59179e-07	2.08933e-06
LOXL2	4017	2.62638	4.753e-37	8.76755e-36
ITGA4	3676	2.60974	1.711e-28	2.05722e-27
LIMS4	100288695	2.60904	1.20719e-67	9.3446e-66
RASGRF2-AS1	102524628	2.6088	1.08751e-13	5.26299e-13
STARD4-AS1	100505678	2.60649	3.09143e-24	2.92607e-23
ADGRE2	30817	2.60634	2.72901e-61	1.54355e-59
NPNT	255743	2.59974	6.03587e-37	1.10941e-35
MIR6132	102466616	2.59681	3.77957e-13	1.76041e-12
TREML4	285852	2.59521	2.25739e-08	7.13091e-08
CFI	3426	2.59477	5.77961e-39	1.15601e-37
HEYL	26508	2.59466	4.34645e-30	5.68188e-29
RASGRF2	5924	2.58896	2.4111e-46	6.74109e-45
ORF38	HHV8GK18_gp42	2.58859	0.00135251	0.00259542
HID1-AS1	102723641	2.58726	5.84068e-27	6.46995e-26
C3orf80	401097	2.58635	5.8034e-22	4.78734e-21
ETS1-AS1	101929517	2.58344	7.12115e-10	2.57201e-09
MRC1	4360	2.58333	5.60371e-20	4.07314e-19
RGS3	5998	2.58201	1.28531e-72	1.23342e-70
KCNE3	10008	2.58119	3.85133e-33	5.91955e-32
SDS	10993	2.58075	2.61111e-24	2.47877e-23
SEL1L3	23231	2.57789	4.22375e-35	7.20032e-34
RHOJ	57381	2.57761	1.56567e-49	5.12989e-48
ADAM12	8038	2.57653	1.82468e-24	1.7497e-23
INSR	3643	2.57234	2.47836e-65	1.68884e-63
RASL10A	10633	2.57134	5.15836e-30	6.72266e-29
SLC18A3	6572	2.56654	0.0242344	0.0384384
ITGA5	3678	2.56616	2.37207e-55	1.00458e-53
TMED7-TICAM2	100302736	2.5571	1.10188e-05	2.70503e-05
KALRN	8997	2.55523	3.44908e-72	3.22526e-70
PCAT19	100505495	2.55437	5.56579e-32	7.98917e-31
LINC02159	285629	2.55149	5.15264e-19	3.53754e-18
MMP10	4319	2.55029	5.81003e-07	1.61616e-06
MIR3681HG	100506457	2.54939	1.57855e-08	5.05507e-08
CYTL1	54360	2.54747	2.25892e-21	1.79078e-20
CENPE	1062	2.54671	1.90165e-32	2.79541e-31
ORF17	HHV8GK18_gp20	2.5442	0.00181706	0.00342984
ORF19	HHV8GK18_gp24	2.54197	0.001238	0.00238801
FAM126A	84668	2.53805	2.0067e-35	3.45767e-34
CASP5	838	2.53736	3.42159e-19	2.37776e-18
DIPK2B	79742	2.53476	1.1432e-45	3.10617e-44
MUC13	56667	2.53435	1.48947e-05	3.60677e-05
GVINP1	387751	2.53431	3.95709e-32	5.7379e-31
RFX8	731220	2.5307	9.91492e-30	1.27338e-28
NOS3	4846	2.52366	4.0311e-48	1.23105e-46
C20orf204	284739	2.5228	1.48837e-42	3.48265e-41
IL2RA	3559	2.52153	2.80027e-15	1.52203e-14
ARAP3	64411	2.51724	2.27783e-47	6.70062e-46
GLIS3	169792	2.51447	2.00119e-47	5.90719e-46
TNIP3	79931	2.51079	4.74382e-18	3.07168e-17
SIGLEC7	27036	2.50901	8.60787e-16	4.82817e-15
MEF2C	4208	2.50692	1.35431e-38	2.66105e-37
FCGR1A	2209	2.50249	2.03931e-20	1.5247e-19
POPDC3	64208	2.49786	1.53533e-16	9.00806e-16
PRKG1	5592	2.49671	9.51245e-34	1.50542e-32
ROPN1L	83853	2.49602	1.05849e-23	9.69981e-23
MAP4K4	9448	2.49055	5.14608e-76	6.0483e-74
APLN	8862	2.49023	1.66648e-10	6.33605e-10
CREM	1390	2.48882	3.31536e-45	8.7936e-44
AKAP12	9590	2.48861	4.80295e-24	4.49456e-23
SLC2A7	155184	2.48804	1.35642e-13	6.51803e-13
DAND5	199699	2.48761	2.35313e-12	1.03204e-11
LINC00689	154822	2.48542	1.34605e-06	3.62009e-06
NOX4	50507	2.483	1.96475e-22	1.67357e-21
PIWIL3	440822	2.48205	5.5288e-07	1.54228e-06
DOCK8	81704	2.48071	8.35624e-60	4.37839e-58
SH2B3	10019	2.48005	4.15011e-54	1.65888e-52
HSPE1-MOB4	100529241	2.47538	0.00838238	0.0143402
PNP	4860	2.4742	6.49771e-48	1.95404e-46
CMKLR2	2825	2.47406	3.08062e-21	2.42047e-20
SIGLEC10	89790	2.47205	4.93008e-31	6.74418e-30
KCNIP1	30820	2.47041	5.54775e-21	4.29051e-20
RGS16	6004	2.46879	2.39088e-25	2.42803e-24
GBP5	115362	2.46661	9.84205e-24	9.0417e-23
CASP4LP	643733	2.46207	6.35199e-22	5.22642e-21
XIRP1	165904	2.4616	3.02157e-14	1.5276e-13
SEMA6B	10501	2.46007	1.3086e-28	1.58156e-27
GPR174	84636	2.45977	2.31711e-12	1.01677e-11
CCDC60	160777	2.45792	1.14619e-09	4.05745e-09
PPM1F	9647	2.45488	5.06055e-74	5.18646e-72
SPSB4	92369	2.45316	9.10628e-15	4.76749e-14
NR2F1-AS1	441094	2.45265	1.52058e-29	1.93064e-28
KIF14	9928	2.45207	8.08187e-26	8.43477e-25
CORO6	84940	2.45056	3.84408e-21	3.00192e-20
TNIK	23043	2.44729	1.36435e-39	2.78989e-38
SLC41A1	254428	2.44518	7.62022e-57	3.49276e-55
TAL1	6886	2.44515	2.03124e-45	5.47837e-44
MYCT1	80177	2.44115	5.31055e-30	6.91397e-29
GRM5	2915	2.43852	4.43269e-06	1.13438e-05
FAM225A	286333	2.43354	7.33322e-32	1.04559e-30
SULT1C4	27233	2.43245	3.23198e-22	2.71329e-21
PIWIL1	9271	2.42994	0.00221011	0.00412887
ITGB3	3690	2.42298	1.00705e-32	1.51336e-31
TOR4A	54863	2.42161	7.01186e-35	1.18274e-33
ARHGAP18	93663	2.42076	1.15484e-46	3.26594e-45
LINC01704	646268	2.41919	1.68407e-06	4.48118e-06
SULF1	23213	2.41797	2.11536e-20	1.57879e-19
FBN2	2201	2.41699	2.80189e-18	1.837e-17
S1PR3	1903	2.41557	1.49517e-43	3.64503e-42
GAGE12G	645073	2.40733	0.0112061	0.018797
SH3TC1	54436	2.40703	6.23844e-34	9.98385e-33
GASK1B	51313	2.40588	4.60021e-31	6.29965e-30
LAPTM5	7805	2.40455	1.23733e-37	2.32937e-36
GDF15	9518	2.402	1.38093e-11	5.69852e-11
GNGT2	2793	2.4016	8.0957e-48	2.42322e-46
KLHL5	51088	2.40076	1.24948e-48	3.91371e-47
LINC02915	400360	2.39621	1.03555e-08	3.36841e-08
IGF2	3481	2.39548	5.42278e-09	1.80773e-08
TMOD2	29767	2.39238	3.84894e-51	1.3565e-49
SCAMP5	192683	2.39152	6.36428e-25	6.28142e-24
TNFSF12-TNFSF13	407977	2.38551	0.00112006	0.00217444
FCGR1CP	100132417	2.38503	1.11457e-16	6.61973e-16
MARCKSL1	65108	2.38484	6.47317e-49	2.06032e-47
RXFP3	51289	2.38082	0.000786731	0.00156079
DCSTAMP	81501	2.38046	5.60701e-07	1.56274e-06
ADAMTS9	56999	2.38041	1.03246e-37	1.95375e-36
ARHGAP29	9411	2.37793	5.89584e-44	1.46806e-42
P2RY8	286530	2.37587	2.3898e-27	2.70338e-26
MIR4645	100616285	2.36753	5.75229e-08	1.75312e-07
CENPK	64105	2.3671	1.90118e-31	2.63167e-30
C3P1	388503	2.36708	0.00834144	0.0142721
BICD1	636	2.36637	2.08432e-55	8.93052e-54
NANOS2	339345	2.36528	0.0135732	0.0224587
TRAPPC3L	100128327	2.36505	6.7235e-14	3.30652e-13
KIF21B	23046	2.35882	7.94038e-33	1.20313e-31
UNC13A	23025	2.35832	8.85631e-15	4.64327e-14
DOCK10	55619	2.35681	1.75303e-48	5.45097e-47
ZNF695	57116	2.35337	4.6692e-15	2.49394e-14
DENND2A	27147	2.35204	5.15718e-22	4.28044e-21
TBX1	6899	2.35016	1.7755e-24	1.70391e-23
LMO2	4005	2.34712	2.76574e-46	7.71098e-45
RGS8	85397	2.34383	3.83306e-08	1.18727e-07
ENPP7	339221	2.34374	0.00037975	0.000784232
HEG1	57493	2.34022	3.36647e-52	1.23931e-50
RPS6KA2	6196	2.33688	9.21653e-60	4.80949e-58
LRRIQ4	344657	2.33441	3.77212e-10	1.39224e-09
ST6GALNAC3	256435	2.33409	1.96556e-34	3.23038e-33
TSPEAR	54084	2.33337	6.21189e-11	2.44187e-10
TNR	7143	2.33314	1.55813e-05	3.76449e-05
PTPRE	5791	2.33129	1.05049e-62	6.33309e-61
PIK3CG	5294	2.33045	5.37328e-34	8.6208e-33
ISLR2	57611	2.32787	4.20331e-12	1.80821e-11
KLHL23	151230	2.32564	2.08724e-09	7.22106e-09
APBA2	321	2.32558	4.23705e-29	5.24706e-28
L1TD1	54596	2.32522	1.45098e-08	4.66638e-08
PTCRA	171558	2.32261	2.57251e-15	1.40181e-14
FAM30A	9834	2.3226	4.46812e-06	1.14242e-05
GRPEL2	134266	2.32229	2.76756e-63	1.71696e-61
ARPIN-AP3S2	100526783	2.31997	1.20317e-05	2.9438e-05
LIPC-AS1	101928694	2.31833	3.05402e-07	8.7401e-07
GALNT4	8693	2.31693	1.11175e-11	4.62349e-11
RNASE9	390443	2.31586	0.00246895	0.00458236
LILRB1	10859	2.31258	2.84174e-15	1.54359e-14
MEF2B	4207	2.3123	1.25738e-05	3.07029e-05
MFAP3	4238	2.31182	5.57623e-45	1.46388e-43
LAMA4	3910	2.31159	1.15552e-35	2.01819e-34
CSGALNACT1	55790	2.30571	1.11306e-43	2.73168e-42
GP9	2815	2.30481	1.70877e-06	4.54501e-06
PLEKHO2	80301	2.30282	5.31866e-48	1.61272e-46
TGM2	7052	2.30082	1.61383e-21	1.29096e-20
SCRN1	9805	2.29902	3.19802e-64	2.07442e-62
GPRC5B	51704	2.29898	1.02437e-35	1.79278e-34
KIF3C	3797	2.29769	5.1426e-58	2.48143e-56
DISC1	27185	2.29539	4.64163e-18	3.00855e-17
ABI3	51225	2.29386	2.37108e-42	5.50786e-41
GNG11	2791	2.29328	2.65443e-23	2.38053e-22
CAMK4	814	2.29315	3.41329e-23	3.04616e-22
ODF3L2	284451	2.29107	1.60114e-11	6.57443e-11
CD38	952	2.28429	7.87232e-13	3.57886e-12
MIR1915	100302129	2.28177	8.89425e-06	2.20523e-05
DCHS1	8642	2.28143	3.50083e-33	5.40677e-32
K1	HHV8GK18_gp01	2.27804	0.0299863	0.046754
SYNJ2BP-COX16	100529257	2.27745	0.000966143	0.00189429
JCAD	57608	2.27646	3.68196e-38	7.10921e-37
MCAM	4162	2.2759	4.74571e-27	5.28212e-26
FCGR1BP	2210	2.27177	7.73553e-19	5.25729e-18
GBX2	2637	2.26963	8.33923e-08	2.5046e-07
POSTN	10631	2.26713	2.03685e-17	1.26855e-16
SLC39A14	23516	2.26507	3.81914e-42	8.79981e-41
LRRC70	100130733	2.26405	9.86193e-28	1.13821e-26
CYP8B1	1582	2.26389	1.05531e-13	5.11425e-13
ELK3	2004	2.26219	2.28899e-44	5.81255e-43
VWA5B2	90113	2.26211	2.01151e-12	8.86614e-12
ST3GAL2	6483	2.25975	2.0862e-60	1.12532e-58
METTL4	64863	2.25916	8.51468e-49	2.68674e-47
SMAD1	4086	2.25694	8.06392e-56	3.51384e-54
SOX30	11063	2.2535	1.81678e-21	1.44744e-20
SSH2	85464	2.25345	8.22815e-75	8.78424e-73
DLGAP5	9787	2.25258	1.43817e-25	1.47987e-24
PRRG1	5638	2.2483	3.19045e-43	7.69734e-42
MIR3186	100422944	2.2478	6.99582e-08	2.11451e-07
STARD8	9754	2.24583	1.30657e-36	2.3642e-35
TSPAN11	441631	2.24287	3.26446e-28	3.87053e-27
CXCL13	10563	2.24082	4.86574e-08	1.49198e-07
SLC2A3	6515	2.23513	1.64596e-24	1.58128e-23
PRR29	92340	2.23321	4.74065e-29	5.85091e-28
MIR3125	100422986	2.23174	7.93874e-08	2.38908e-07
SERPINB9	5272	2.22771	2.98049e-41	6.57762e-40
ART1	417	2.22618	4.97389e-08	1.52332e-07
DOCK4	9732	2.22569	6.8945e-45	1.80072e-43
ITGA9-AS1	101928153	2.22562	2.96429e-38	5.73648e-37
GJA5	2702	2.22331	9.79352e-19	6.61909e-18
PCDHB8	56128	2.22193	1.01153e-20	7.6906e-20
ELFN1	392617	2.2213	2.48239e-29	3.11326e-28
SGO2	151246	2.21987	2.4073e-33	3.74271e-32
CCNE2	9134	2.21759	5.53275e-32	7.94619e-31
SLC40A1	30061	2.21728	6.05583e-18	3.88976e-17
ORF18	HHV8GK18_gp22	2.21692	0.0066839	0.0116042
GJC1	10052	2.21492	1.73461e-29	2.19694e-28
PLXND1	23129	2.21437	5.25751e-35	8.91516e-34
SCN1A-AS1	101929680	2.21391	5.40585e-08	1.65108e-07
HTR3C	170572	2.2129	0.000296721	0.000620974
ADAMTS5	11096	2.21185	1.19097e-17	7.50674e-17
TMPRSS11A	339967	2.21027	1.93881e-05	4.63742e-05
LINC00888	100505687	2.20954	3.62239e-37	6.72556e-36
KCNJ2	3759	2.20902	2.44079e-33	3.79247e-32
GUCY1B1	2983	2.20763	1.25162e-28	1.51411e-27
RAB39A	54734	2.20749	1.34787e-20	1.01723e-19
SOX18	54345	2.20658	7.81561e-23	6.85323e-22
COL11A1	1301	2.20638	4.52894e-07	1.27475e-06
CLDN24	100132463	2.20438	7.83625e-11	3.05648e-10
FAM225B	100128385	2.20136	1.0782e-22	9.32986e-22
IL21R	50615	2.20077	1.66108e-26	1.79959e-25
LAMB1	3912	2.20048	1.44482e-70	1.24226e-68
CLSPN	63967	2.19926	8.67795e-41	1.8811e-39
C18orf54	162681	2.19749	1.18746e-42	2.79385e-41
SFTA1P	207107	2.19746	1.25207e-07	3.71132e-07
CYRIA	81553	2.19523	4.77651e-40	1.00069e-38
ICOS	29851	2.1946	2.7925e-17	1.72658e-16
SHROOM4	57477	2.19434	1.65595e-39	3.37271e-38
MSR1	4481	2.19307	1.70225e-13	8.12048e-13
BRCA2	675	2.19052	1.44128e-27	1.65228e-26
FJX1	24147	2.18934	1.70775e-42	3.98506e-41
CDKN2A	1029	2.18767	8.62159e-28	9.97302e-27
ELAPOR2	222223	2.18694	4.69239e-36	8.29161e-35
CMTM1	113540	2.18624	4.03474e-30	5.28247e-29
EXOC3L2	90332	2.18529	1.38235e-30	1.85146e-29
RAB43	339122	2.18414	4.66869e-24	4.37532e-23
CPNE5	57699	2.18362	4.01447e-26	4.26446e-25
SOCS3-DT	101928674	2.18125	3.73742e-14	1.87434e-13
PTPRM	5797	2.1792	7.65716e-50	2.5646e-48
CCM2L	140706	2.17911	1.81197e-36	3.26485e-35
GLT8D2	83468	2.17752	2.1495e-28	2.57358e-27
PRECSIT	283487	2.17546	5.66736e-40	1.18248e-38
PRND	23627	2.17486	6.7618e-05	0.000152308
LCP2	3937	2.17446	5.71278e-40	1.19002e-38
CKLF-CMTM1	100529251	2.17391	0.00120375	0.00232668
NREP	9315	2.17169	4.74345e-29	5.85155e-28
ISL2	64843	2.16978	8.98505e-07	2.45563e-06
DGKD	8527	2.16643	6.97078e-48	2.09385e-46
TEK	7010	2.16618	9.18479e-34	1.45717e-32
PKD2L1	9033	2.16564	1.13835e-09	4.03135e-09
PIF1	80119	2.16387	5.71841e-31	7.77279e-30
CD226	10666	2.16355	6.55274e-26	6.86965e-25
UACA	55075	2.16341	3.12125e-41	6.88233e-40
MAP3K7CL	56911	2.16114	1.62122e-55	6.98133e-54
FAM78A	286336	2.16069	1.25149e-33	1.96964e-32
STEAP1B-AS1	100506178	2.15862	8.00654e-14	3.91795e-13
CCL1	6346	2.15805	7.69616e-06	1.92285e-05
MIR8083	102466879	2.15665	2.57493e-06	6.73213e-06
TSPAN15	23555	2.15626	1.23793e-31	1.74084e-30
AATK	9625	2.15215	3.40498e-27	3.81972e-26
TGFB3	7043	2.15083	1.59505e-25	1.63998e-24
STK33	65975	2.15045	5.35887e-14	2.65324e-13
C4orf50	389197	2.14925	2.76262e-08	8.66071e-08
FAM43A	131583	2.14876	1.38646e-43	3.38968e-42
GYPA	2993	2.14827	0.00181549	0.00342764
LIMS3	96626	2.14717	7.31084e-37	1.33799e-35
LIMS1	3987	2.14655	3.03791e-50	1.0337e-48
HMOX1	3162	2.14621	3.56264e-20	2.62606e-19
ZBTB46	140685	2.14596	1.40535e-40	3.02079e-39
DGKI	9162	2.14551	1.85383e-19	1.30887e-18
ZNF99	7652	2.14516	7.75873e-11	3.02809e-10
MMP25	64386	2.14479	2.88319e-28	3.42639e-27
INHBA	3624	2.14331	1.43128e-14	7.38615e-14
TEDC2-AS1	729652	2.14165	2.16866e-05	5.15689e-05
TLNRD1	59274	2.141	2.96489e-43	7.16663e-42
IQSEC3	440073	2.14089	1.95163e-14	9.96904e-14
ZEB1	6935	2.1397	2.26051e-30	2.99012e-29
ECSCR	641700	2.13952	2.83103e-30	3.73324e-29
FYB1	2533	2.13752	2.5983e-23	2.33101e-22
ADAMTS12	81792	2.13596	2.71014e-19	1.89311e-18
SALRNA3	104548972	2.13465	5.31386e-05	0.000121002
C19orf84	147646	2.13373	2.84485e-06	7.40683e-06
TLR4	7099	2.13353	1.8101e-22	1.54492e-21
COL4A2-AS1	100874203	2.13319	3.02921e-10	1.12684e-09
PTX4	390667	2.13313	1.24881e-06	3.37058e-06
SHE	126669	2.13258	1.11654e-45	3.04017e-44
ROBO4	54538	2.13178	1.23003e-27	1.41517e-26
TLR8	51311	2.1296	3.55198e-15	1.91517e-14
RXFP1	59350	2.12831	1.67306e-09	5.82987e-09
STRIP2	57464	2.12772	2.56335e-34	4.18599e-33
BVES	11149	2.12639	6.04354e-30	7.84436e-29
NHSL2	340527	2.12538	1.35847e-37	2.55556e-36
PHEX	5251	2.12535	1.00629e-18	6.79759e-18
RGS7BP	401190	2.1237	1.14525e-09	4.05522e-09
C2CD4B	388125	2.12088	4.60732e-15	2.46294e-14
RNF144A	9781	2.11717	1.36091e-58	6.73151e-57
EMID1	129080	2.11713	3.8401e-21	2.99973e-20
SLC35G3	146861	2.11705	0.00422777	0.00755819
LINC01132	100506810	2.11298	5.31177e-22	4.40304e-21
CAVIN4	347273	2.11172	2.57307e-29	3.22382e-28
SEMA6A	57556	2.10984	5.61292e-48	1.69793e-46
THEMIS2	9473	2.10958	2.61235e-30	3.44841e-29
ADAMTSL3	57188	2.10916	6.91468e-23	6.08406e-22
KRTAP5-AS1	338651	2.10505	7.67757e-05	0.00017197
KLF17	128209	2.10497	7.18698e-05	0.000161431
SLC2A14	144195	2.10472	4.22403e-17	2.57502e-16
VLDLR	7436	2.10414	1.17534e-38	2.32007e-37
CAMK1G	57172	2.10391	5.4165e-10	1.97273e-09
TMEM204	79652	2.10311	2.76903e-41	6.14802e-40
DOK3	79930	2.10228	8.31811e-34	1.32213e-32
KLHL6	89857	2.10011	3.36886e-27	3.78251e-26
TNFRSF9	3604	2.09966	1.7075e-18	1.134e-17
SCARF1	8578	2.09917	1.31192e-38	2.5837e-37
MIR6756	102465453	2.09906	2.06718e-06	5.46091e-06
IGF1	3479	2.0987	2.4425e-13	1.15167e-12
LINC00538	100861504	2.09825	0.000461038	0.000942003
LYVE1	10894	2.09804	2.94246e-12	1.28108e-11
ABCA4	24	2.09719	5.60848e-11	2.21248e-10
PCDHGA4	56111	2.09617	6.2626e-14	3.08637e-13
DNAJC5B	85479	2.09605	5.73965e-08	1.74969e-07
CALHM6	441168	2.09512	4.41506e-19	3.04257e-18
BMP2	650	2.09447	2.21339e-25	2.25403e-24
FBLIM1	54751	2.09384	2.73915e-50	9.37016e-49
KIF17	57576	2.09318	1.41915e-29	1.80454e-28
SFMBT2	57713	2.09273	4.31546e-37	7.97193e-36
FAR2P4	440910	2.09269	0.0156822	0.0256912
ITGB1	3688	2.09235	1.31459e-38	2.585e-37
RNF182	221687	2.08997	6.13781e-16	3.48081e-15
ARHGEF15	22899	2.08978	3.32283e-29	4.13289e-28
LETR1	400456	2.08589	3.26597e-24	3.08557e-23
MROCKI	285758	2.0843	4.22907e-16	2.42139e-15
PAEP	5047	2.08379	1.6674e-09	5.81094e-09
RFLNB	359845	2.07922	4.5031e-43	1.08032e-41
F2R	2149	2.07796	3.01976e-36	5.3918e-35
KANK3	256949	2.07099	4.47718e-21	3.4783e-20
SCN3B	55800	2.06959	1.16829e-22	1.00889e-21
SNORA11D	100124541	2.06621	1.37191e-06	3.68575e-06
PREX1	57580	2.06498	3.38136e-41	7.44946e-40
IFNG	3458	2.06468	1.88503e-08	5.99977e-08
GPR15	2838	2.06383	3.90136e-05	9.0209e-05
RTN1	6252	2.06243	1.96139e-29	2.47195e-28
SLC4A8	9498	2.06047	2.70798e-33	4.19745e-32
TBC1D9	23158	2.06033	4.25005e-40	8.94047e-39
NOL4L	140688	2.06029	4.85209e-48	1.47474e-46
ACKR2	1238	2.0602	6.98909e-16	3.94524e-15
HSPG2	3339	2.05835	2.49407e-28	2.97638e-27
NRIP1	8204	2.05654	1.03927e-31	1.46792e-30
GNA15-DT	100996351	2.05586	7.1252e-15	3.76183e-14
IL21	59067	2.05564	0.00396626	0.00712198
HHIPL1	84439	2.05547	1.09602e-29	1.40201e-28
EFCAB14-AS1	100130197	2.05473	1.59695e-10	6.0798e-10
ARHGAP6	395	2.05417	1.52403e-31	2.12222e-30
LGI2	55203	2.05407	7.72738e-13	3.51609e-12
HTR1F	3355	2.05295	3.82344e-15	2.05548e-14
TFEC	22797	2.0529	1.05716e-13	5.12224e-13
ADAMTS6	11174	2.05263	1.99295e-17	1.24181e-16
FBXL19-AS1	283932	2.05068	3.57111e-43	8.60763e-42
DTHD1	401124	2.04961	2.09679e-10	7.91222e-10
CCDC88A	55704	2.04844	5.17643e-35	8.78347e-34
RASAL3	64926	2.04822	8.76792e-25	8.57449e-24
HYAL2	8692	2.04805	6.73747e-47	1.9288e-45
IL4I1	259307	2.04722	4.22425e-13	1.95898e-12
TNS3	64759	2.04637	2.98105e-48	9.15833e-47
AFAP1-AS1	84740	2.04607	1.10601e-15	6.16048e-15
ARHGAP25	9938	2.04606	8.06754e-49	2.54879e-47
CREB3L3	84699	2.0431	0.00284968	0.00523401
BCL2L11	10018	2.04271	1.50348e-56	6.77016e-55
TSPAN12	23554	2.04194	2.07478e-21	1.64633e-20
LZTS1	11178	2.04016	2.18221e-35	3.75252e-34
PTPRC	5788	2.03811	1.41237e-19	1.0041e-18
BLM	641	2.038	5.30321e-32	7.62507e-31
ASAP1	50807	2.03496	6.9047e-56	3.02414e-54
CENPF	1063	2.03373	1.70434e-29	2.15968e-28
AIM2	9447	2.03084	1.39679e-17	8.76954e-17
PKD1L3	342372	2.02771	1.52685e-22	1.30796e-21
PHACTR2	9749	2.02239	6.41695e-35	1.08382e-33
OR1G1	8390	2.02012	0.0209585	0.0336023
TNFSF11	8600	2.01823	2.38948e-10	8.96125e-10
DGKH	160851	2.01797	3.36926e-59	1.70271e-57
HSPA13	6782	2.01739	9.31676e-25	9.09386e-24
ZNF556	80032	2.01368	0.00147679	0.00282207
KCNQ1	3784	2.01362	2.18426e-23	1.97199e-22
RELN	5649	2.01346	1.84186e-09	6.39719e-09
UCP1	7350	2.01118	2.81841e-06	7.34172e-06
HS3ST3A1	9955	2.00978	3.63928e-27	4.0772e-26
CD163L1	283316	2.00946	4.8416e-19	3.33024e-18
MIR9-1HG	10485	2.00941	3.93062e-10	1.4474e-09
NLRP11	204801	2.00929	0.0251343	0.0397109
COL5A2	1290	2.00887	4.39562e-21	3.41701e-20
CEP170	645455	2.00602	1.60153e-29	2.0314e-28
DNTT	1791	2.00519	0.00978933	0.016569
AVPR1A	552	2.00321	3.72308e-17	2.2794e-16
ATP4B	496	2.00286	7.91246e-09	2.59847e-08
TRIM9	114088	2.00193	5.92097e-15	3.14223e-14
ECI2-DT	100507506	1.9965	1.06132e-22	9.19308e-22
SMYD2	56950	1.99639	8.40405e-41	1.82482e-39
HMGA2-AS1	100129940	1.99465	2.3597e-10	8.85864e-10
CARD8-AS1	100505812	1.99331	3.98938e-31	5.47487e-30
LINC00507	100862680	1.99312	0.00817733	0.0140184
MICAL2	9645	1.99283	1.05101e-39	2.16298e-38
TCL1A	8115	1.99186	0.000147319	0.000319881
PCLO	27445	1.99129	1.26905e-25	1.309e-24
FGD5	152273	1.99121	6.64334e-33	1.01078e-31
ERC2	26059	1.99062	2.20726e-15	1.20843e-14
PEAK1	79834	1.99057	1.89536e-46	5.32489e-45
ERICH4	100170765	1.99015	2.4134e-09	8.31132e-09
NLGN4X	57502	1.9901	2.14352e-14	1.09231e-13
HLA-DPB2	3116	1.98953	0.00012667	0.000276946
MMP17	4326	1.98751	1.12469e-17	7.10824e-17
GRM3	2913	1.98724	1.68093e-13	8.03075e-13
TMEM217	221468	1.9844	1.87999e-25	1.92215e-24
CARD8	22900	1.97981	8.57944e-59	4.2684e-57
MS4A15	219995	1.97932	0.00168024	0.00318496
SIRPG-AS1	101929010	1.97883	8.42273e-07	2.30706e-06
LRRTM2	26045	1.97663	2.76594e-21	2.18125e-20
ZFR2	23217	1.97478	8.32421e-09	2.72845e-08
H1-8	132243	1.97462	0.000155971	0.000337611
SHANK3	85358	1.97428	1.25689e-25	1.29698e-24
CCL4L2	9560	1.97376	1.39929e-09	4.90997e-09
ATP11A	23250	1.97277	1.68783e-49	5.51602e-48
GRB10	2887	1.97212	1.24076e-49	4.08623e-48
RASIP1	54922	1.97203	1.05314e-32	1.5789e-31
PAQR8	85315	1.97141	1.88757e-52	7.06034e-51
ATP11A-AS1	100874205	1.97122	2.96218e-05	6.94327e-05
PCDHGA12	26025	1.97081	6.35077e-15	3.36197e-14
TCIM	56892	1.97081	4.12734e-16	2.36526e-15
AMZ1	155185	1.9706	2.89143e-16	1.67309e-15
PITX3	5309	1.97017	3.89481e-09	1.31549e-08
RBM38	55544	1.96983	8.02261e-46	2.19845e-44
CDR2L	30850	1.96945	1.19888e-38	2.36472e-37
ST8SIA1	6489	1.96917	7.7183e-41	1.67876e-39
PLEKHG1	57480	1.96776	6.26601e-48	1.88658e-46
PDE4B	5142	1.96577	1.14724e-29	1.46534e-28
SRGAP1	57522	1.96138	1.54999e-46	4.36416e-45
DLGAP3	58512	1.96082	2.1631e-17	1.34326e-16
RELT	84957	1.95784	7.7869e-38	1.48009e-36
TOP2A	7153	1.95783	7.9918e-23	7.00294e-22
PEAR1	375033	1.95735	3.01801e-26	3.22332e-25
APOLD1	81575	1.95679	4.58574e-22	3.81356e-21
SMC4	10051	1.95565	5.40228e-40	1.12994e-38
KLHL33	123103	1.95514	4.32351e-16	2.4738e-15
CD28	940	1.95411	1.18635e-13	5.72227e-13
DTL	51514	1.9538	9.85348e-34	1.55843e-32
SERPINE1	5054	1.95203	2.82847e-13	1.32731e-12
GOLGA6L7	728310	1.95142	1.82182e-05	4.36902e-05
MIR646HG	284757	1.95119	5.76648e-07	1.60474e-06
EPOR	2057	1.95062	9.06336e-30	1.16519e-28
LYZ	4069	1.94853	1.87988e-14	9.61213e-14
CKAP2L	150468	1.94812	2.33248e-23	2.10136e-22
PHTF1	10745	1.94776	3.32895e-45	8.82052e-44
PLEKHG2	64857	1.94511	2.63075e-28	3.13658e-27
GBP1	2633	1.9443	8.15688e-31	1.10114e-29
CHN1	1123	1.94246	1.24088e-24	1.20294e-23
COL6A3	1293	1.94233	9.95683e-19	6.72769e-18
TBX2	6909	1.94199	3.4671e-16	1.99537e-15
LINC00528	200298	1.94198	5.11791e-20	3.73062e-19
SOX17	64321	1.94151	8.51303e-17	5.09034e-16
L3MBTL3	84456	1.93955	6.73863e-53	2.5693e-51
GUCY1A1	2982	1.93835	2.185e-26	2.34635e-25
PLA2G2D	26279	1.93735	2.87704e-05	6.75359e-05
GALNT18	374378	1.93662	1.90093e-55	8.15839e-54
ADGRL4	64123	1.93444	1.26761e-20	9.58071e-20
CASP10	843	1.93346	1.74014e-51	6.20974e-50
MECOM	2122	1.93224	1.4775e-24	1.4264e-23
LIPA	3988	1.93183	2.02451e-23	1.83228e-22
FAM9C	171484	1.93168	4.46068e-05	0.000102357
NCAPG	64151	1.93127	1.25796e-24	1.21904e-23
PCDHB7	56129	1.92822	2.27027e-25	2.3092e-24
RPA4	29935	1.92662	6.64601e-08	2.014e-07
LINC00943	100507206	1.92626	9.31916e-07	2.54368e-06
LINC03026	102724156	1.92626	1.6204e-06	4.31893e-06
FUT4	2526	1.92621	2.74735e-44	6.96267e-43
IL21R-AS1	283888	1.92534	2.5945e-08	8.15159e-08
MIR6757	102466193	1.92521	1.49555e-05	3.6208e-05
PRR11	55771	1.92497	3.15339e-33	4.87899e-32
PTPRG	5793	1.92465	3.19157e-34	5.17559e-33
CHST11	50515	1.92338	2.80213e-32	4.09328e-31
WIPF1	7456	1.9229	1.20866e-35	2.10951e-34
MIR181B1	406955	1.92246	0.000411159	0.00084555
PTPRB	5787	1.92242	1.8165e-32	2.67331e-31
CASP12	100506742	1.91961	2.85181e-13	1.33777e-12
IL12A	3592	1.9195	3.49169e-14	1.75625e-13
AMELX	265	1.91877	0.000155658	0.000336989
RAI14	26064	1.91774	1.05151e-43	2.58807e-42
VIP	7432	1.9166	1.45754e-11	5.99825e-11
DOCK4-AS1	100506413	1.9162	8.6894e-06	2.15695e-05
FAM171B	165215	1.91604	4.43119e-31	6.07144e-30
CEP55	55165	1.91581	1.49672e-21	1.20216e-20
WNT5A	7474	1.91513	2.15278e-24	2.05356e-23
JAK3	3718	1.91254	1.34988e-21	1.08797e-20
FAM124B	79843	1.91087	1.7506e-21	1.39514e-20
PDE10A	10846	1.90963	4.47371e-25	4.4793e-24
CSTF3-DT	338739	1.90927	2.72793e-06	7.1169e-06
TMC1	117531	1.90798	1.35442e-15	7.51797e-15
EPHB1	2047	1.90781	1.71918e-26	1.85939e-25
MAP1S	55201	1.90769	3.63466e-33	5.60333e-32
PLXDC1	57125	1.90766	5.6458e-22	4.66484e-21
EPHA3	2042	1.90553	5.61265e-18	3.61507e-17
REEP1	65055	1.90529	7.16962e-28	8.35e-27
ZNF281	23528	1.90411	2.47916e-31	3.42063e-30
PLAUR	5329	1.90403	7.59341e-28	8.81152e-27
MAP4K2	5871	1.90366	1.82832e-31	2.53354e-30
UBE2J1	51465	1.90187	1.1218e-34	1.864e-33
ACSM2A	123876	1.89956	1.06736e-06	2.89579e-06
AOAH	313	1.89816	7.95277e-18	5.07511e-17
COL15A1	1306	1.89517	2.32459e-19	1.62868e-18
CDKN2B-AS1	100048912	1.89497	9.2788e-20	6.66502e-19
FOXL1	2300	1.89461	1.06145e-17	6.72515e-17
IDO1	3620	1.8938	5.98953e-15	3.17731e-14
ACOT11	26027	1.89372	2.47908e-28	2.95988e-27
SLC45A3	85414	1.89372	8.10564e-33	1.22527e-31
N4BP3	23138	1.89336	1.36888e-25	1.4097e-24
SAMD9	54809	1.89254	4.64191e-20	3.39621e-19
ADAMTS20	80070	1.8897	0.021245	0.0340149
TNPO1	3842	1.8897	7.79429e-38	1.48039e-36
C7orf61	402573	1.88965	1.45506e-22	1.24896e-21
PAPOLB	56903	1.88927	2.5104e-06	6.5755e-06
FBXL7	23194	1.88783	1.54068e-31	2.14191e-30
PDE1A	5136	1.8872	1.40125e-17	8.79539e-17
IKBIP	121457	1.88625	5.98069e-27	6.61646e-26
MYO7A	4647	1.88526	1.5188e-19	1.07797e-18
CAVIN2	8436	1.88409	5.53383e-25	5.4914e-24
LIPI	149998	1.88395	9.60234e-06	2.37207e-05
FAM174B	400451	1.88372	3.65266e-28	4.3188e-27
DPRX	503834	1.88316	0.000258315	0.000545501
PRSS2	5645	1.88311	0.0077189	0.0132927
OR5AK4P	219525	1.8789	0.000216718	0.000461881
CNTNAP2	26047	1.8763	0.000208171	0.00044474
CPT1C	126129	1.87585	3.24356e-30	4.26187e-29
MKI67	4288	1.87523	7.27124e-25	7.1408e-24
CACNG1	786	1.87487	0.00112971	0.00219151
TFPI	7035	1.87202	1.7415e-17	1.08752e-16
MIR6774	102466732	1.87123	0.000945671	0.00185708
DDO	8528	1.87111	3.68212e-25	3.70264e-24
TYMS	7298	1.87096	1.50149e-24	1.44901e-23
CD72	971	1.87044	9.62443e-21	7.33265e-20
TREH	11181	1.86992	4.37626e-07	1.23462e-06
NES	10763	1.86922	5.79015e-21	4.47257e-20
ZNF257	113835	1.86774	1.23198e-21	9.96393e-21
GPR142	350383	1.86692	4.83047e-06	1.23053e-05
KIF20A	10112	1.86489	8.91424e-23	7.77402e-22
SIGLEC8	27181	1.86191	1.41673e-10	5.41945e-10
CSNK1G2-AS1	255193	1.86004	1.0357e-06	2.81349e-06
BTBD17	388419	1.8599	2.77278e-05	6.5202e-05
TRPA1	8989	1.85958	6.81252e-08	2.06178e-07
RGS9	8787	1.85951	2.10612e-20	1.57235e-19
ADPRH	141	1.85912	3.53034e-40	7.45094e-39
GOLGA8G	283768	1.85882	3.40291e-05	7.91912e-05
SPRY3	10251	1.85791	1.2441e-42	2.91909e-41
CD177	57126	1.85649	0.00269657	0.00497347
NDC80	10403	1.85642	2.47898e-24	2.35595e-23
AGBL1-AS1	727915	1.85487	0.010615	0.0178745
RDH8	50700	1.85475	0.000645498	0.0012962
DPY19L1	23333	1.85445	5.09325e-42	1.16413e-40
HECW2-AS1	101927482	1.85411	3.79046e-13	1.76484e-12
CDC42BPA	8476	1.85149	2.27765e-55	9.69402e-54
PRAG1	157285	1.85148	2.0853e-39	4.23707e-38
KIF18A	81930	1.85017	2.26021e-21	1.79125e-20
ELMO1	9844	1.8497	5.14062e-43	1.23096e-41
GIMAP8	155038	1.8496	3.39961e-33	5.25361e-32
BLOC1S5	63915	1.84838	0.0009311	0.00182936
ASPM	259266	1.84767	1.41596e-19	1.00637e-18
PLCB1	23236	1.84745	1.51373e-25	1.557e-24
LINC01501	340515	1.84734	0.0186662	0.0302317
CERKL	375298	1.84672	4.81353e-14	2.39434e-13
ATP11C	286410	1.84654	8.61352e-45	2.24057e-43
SAMD9L	219285	1.84472	2.11154e-23	1.90903e-22
CBLB	868	1.84263	3.3157e-46	9.2242e-45
OLFML2B	25903	1.8426	5.94173e-15	3.1526e-14
CDH17	1015	1.84204	3.62944e-07	1.03177e-06
SOCS2	8835	1.84141	3.86009e-34	6.23602e-33
CCL8	6355	1.8406	2.17416e-11	8.82686e-11
COL10A1	1300	1.83982	1.10554e-07	3.28897e-07
TCFL5	10732	1.83928	7.03091e-39	1.39865e-37
DNASE2B	58511	1.83719	0.000624065	0.00125518
ORAI2	80228	1.83694	8.19725e-34	1.30372e-32
LINC01925	105376854	1.83543	0.0112304	0.0188352
SLFN5	162394	1.83394	6.11417e-24	5.68835e-23
LINC02875	388407	1.83322	1.07468e-11	4.47586e-11
STARD4	134429	1.83275	3.05436e-20	2.2592e-19
SHC1	6464	1.83148	2.95862e-54	1.19004e-52
MS4A7	58475	1.83099	4.56403e-10	1.67152e-09
AJAP1	55966	1.83052	7.82247e-15	4.12063e-14
RRM2	6241	1.83001	1.69047e-22	1.44522e-21
IFNG-AS1	100885789	1.82925	0.000378648	0.000782082
SAMSN1	64092	1.82685	2.96424e-15	1.60842e-14
TCF4	6925	1.82598	5.35404e-42	1.22047e-40
TMTC4	84899	1.8259	5.07471e-44	1.27225e-42
GJD3	125111	1.8258	2.84357e-39	5.75952e-38
KCNA3	3738	1.82557	1.86431e-11	7.61718e-11
FHAD1	114827	1.82464	1.17201e-17	7.39455e-17
ANO4	121601	1.82419	6.57407e-08	1.99268e-07
SLC27A3	11000	1.82322	3.07487e-29	3.83005e-28
MYF6	4618	1.82308	0.00824605	0.0141267
SCN1A	6323	1.823	4.08942e-05	9.42852e-05
BCAR1	9564	1.82223	1.25102e-35	2.17904e-34
LINGO1	84894	1.82165	1.33876e-17	8.41963e-17
TOX2	84969	1.82085	3.17466e-18	2.07609e-17
FNDC1	84624	1.81982	3.64018e-07	1.03459e-06
STC2	8614	1.81805	4.71276e-14	2.34649e-13
MCTP1	79772	1.8174	1.72139e-23	1.56403e-22
PECAM1	5175	1.81614	1.37493e-31	1.92085e-30
RAB31	11031	1.81459	1.54288e-28	1.85944e-27
PRSS23	11098	1.81451	5.32926e-17	3.22957e-16
SCIMP	388325	1.81444	3.83852e-19	2.65813e-18
ADAM10	102	1.81441	2.93817e-39	5.94644e-38
S1PR1	1901	1.8129	2.18396e-23	1.97199e-22
CHRNB4	1143	1.81234	8.24519e-08	2.47752e-07
CSRNP3	80034	1.81094	6.27317e-27	6.93105e-26
FPR3	2359	1.81072	5.4804e-17	3.31632e-16
IL12B	3593	1.80945	4.29058e-08	1.32338e-07
DERL3	91319	1.80846	5.51385e-09	1.83714e-08
PTX3	5806	1.80795	4.77369e-06	1.21679e-05
LINC01146	283587	1.80673	0.000413761	0.000850561
FAM124A	220108	1.80591	5.20557e-36	9.17944e-35
F8	2157	1.80537	3.56587e-19	2.47333e-18
TLR1	7096	1.80438	1.73831e-22	1.48464e-21
MIR874	100126343	1.80435	0.000636971	0.00127974
EDNRA	1909	1.8032	4.63449e-23	4.11309e-22
LINC00996	285972	1.80044	4.84895e-09	1.62299e-08
PCDHB13	56123	1.79966	2.88802e-29	3.60609e-28
GNG2	54331	1.79946	2.09339e-23	1.89329e-22
COTL1	23406	1.79894	1.17592e-32	1.75682e-31
KCNJ8	3764	1.79759	1.94757e-19	1.37354e-18
LRCH2	57631	1.79643	1.39693e-16	8.22618e-16
USHBP1	83878	1.79481	7.85031e-20	5.66274e-19
ST3GAL6	10402	1.79313	2.33331e-42	5.42505e-41
KIF4A	24137	1.79293	6.10509e-30	7.91622e-29
BRINP1	1620	1.79287	1.37087e-07	4.04893e-07
FCGR3B	2215	1.79045	3.9507e-14	1.97782e-13
CBLN4	140689	1.78742	0.000441456	0.000904445
PCBP3	54039	1.78672	1.3924e-14	7.19566e-14
SEC24D	9871	1.78593	2.85815e-31	3.9393e-30
CXCL10	3627	1.78403	1.28041e-06	3.45187e-06
ANKRD6	22881	1.78184	1.55633e-39	3.17233e-38
SACS	26278	1.78141	8.08321e-31	1.09177e-29
LRRC74A	145497	1.78137	2.41655e-07	6.98205e-07
FZD8	8325	1.78085	2.76524e-23	2.47817e-22
MIR3916	100500849	1.78059	1.04192e-15	5.80979e-15
FOXD4L4	349334	1.78027	1.30243e-05	3.17665e-05
IGSF21	84966	1.78027	6.02578e-15	3.19521e-14
GCH1	2643	1.77919	9.65991e-32	1.36819e-30
ACSM2B	348158	1.77909	6.43938e-07	1.78464e-06
CGAS	115004	1.77639	1.51343e-30	2.02069e-29
FNDC3B	64778	1.77456	3.06721e-35	5.26024e-34
FAM162B	221303	1.77455	3.89041e-22	3.24903e-21
GALNT9	50614	1.77204	0.000346168	0.000718703
DPPA4	55211	1.77113	0.00075048	0.00149327
DOCK6	57572	1.77057	4.3141e-40	9.06032e-39
KCNIP1-AS1	105377716	1.76894	0.00119041	0.00230247
NRAS	4893	1.76867	1.2393e-36	2.24883e-35
RIT2	6014	1.7683	0.0156143	0.0255816
PEG10	23089	1.76751	6.09302e-13	2.79326e-12
CENPI	2491	1.76689	4.30211e-28	5.06798e-27
PDGFA	5154	1.76594	2.42817e-39	4.92593e-38
HOXD8	3234	1.76578	4.06278e-35	6.93514e-34
SHCBP1	79801	1.76452	1.00652e-27	1.16114e-26
LINC00924	145820	1.76428	7.43223e-09	2.44704e-08
SLC16A3	9123	1.76341	6.40675e-19	4.3716e-18
DMXL2	23312	1.76326	1.72342e-28	2.07117e-27
SH3RF3	344558	1.76136	9.41795e-36	1.65165e-34
CYP4F30P	100132708	1.76102	0.018782	0.0303952
NKX6-1	4825	1.76052	0.0010029	0.00196155
TRIB2	28951	1.7602	6.78359e-49	2.1511e-47
MELK	9833	1.75765	1.36952e-19	9.74174e-19
INSRR	3645	1.7576	1.30606e-07	3.86598e-07
RIPOR3-AS1	100506175	1.75701	0.016517	0.026964
MMP14	4323	1.75637	3.81203e-44	9.59448e-43
F2RL2	2151	1.75612	6.49429e-12	2.75263e-11
BUB1	699	1.75495	2.90007e-25	2.9335e-24
CLDN5	7122	1.75447	3.20733e-10	1.19116e-09
ITGAV	3685	1.75299	5.10823e-39	1.02653e-37
HIPK2	28996	1.75156	8.17757e-32	1.16403e-30
CCDC42	146849	1.75091	2.49367e-06	6.53368e-06
FDCSP	260436	1.7487	0.00527747	0.0093011
STIL	6491	1.747	2.36521e-28	2.82524e-27
IL12RB1	3594	1.74525	5.55371e-17	3.35765e-16
CDKL5	6792	1.74525	1.01157e-13	4.9116e-13
IGSF6	10261	1.7446	1.04278e-16	6.20052e-16
FGF23	8074	1.74453	0.0125794	0.0209319
OAS2	4939	1.74357	1.77203e-13	8.44548e-13
DENND11	57189	1.74253	5.56143e-33	8.50209e-32
ZFHX4	79776	1.74236	1.0721e-16	6.37193e-16
STARD3NL	83930	1.74147	8.46518e-31	1.14155e-29
SLC2A6	11182	1.74091	1.21077e-19	8.63895e-19
GGNBP1	449520	1.74067	5.39184e-05	0.00012268
GUCY1A2	2977	1.74039	1.49524e-12	6.65355e-12
SELE	6401	1.73954	1.02715e-06	2.79174e-06
LDB2	9079	1.73934	5.24393e-20	3.81572e-19
RNU6-1	26827	1.73825	0.00267111	0.00492937
SSUH2	51066	1.73809	7.45498e-13	3.39516e-12
CD84	8832	1.73758	1.85594e-16	1.08395e-15
ZNF608	57507	1.737	2.65952e-29	3.32888e-28
LINC02101	101928569	1.73674	0.00512182	0.00904669
ITGAX	3687	1.73618	3.071e-16	1.77259e-15
PIK3AP1	118788	1.73571	1.67757e-20	1.25607e-19
ADD3	120	1.73491	1.23118e-26	1.34007e-25
DCLK3	85443	1.73459	5.07511e-13	2.33875e-12
LGMN	5641	1.73454	1.75908e-19	1.24437e-18
ZDHHC14	79683	1.73201	4.18218e-37	7.7313e-36
ACRV1	56	1.73174	3.8753e-10	1.42826e-09
ODF2L	57489	1.73044	1.7892e-40	3.82023e-39
DISC1-IT1	104472714	1.73034	2.58834e-05	6.10497e-05
GAU1	101929549	1.72891	4.4033e-10	1.61543e-09
MIR4435-2HG	541471	1.72557	4.98511e-15	2.65879e-14
PCDHB12	56124	1.7253	8.11495e-28	9.3997e-27
SPHK1	8877	1.72518	4.49683e-21	3.4925e-20
P2RY6	5031	1.72428	9.39103e-20	6.73997e-19
ZNF467	168544	1.72348	3.91701e-27	4.37878e-26
FSIP1	161835	1.72284	1.60863e-14	8.2664e-14
FAM151A	338094	1.7221	5.86259e-14	2.8976e-13
MAGI1-AS1	100873983	1.72147	1.2189e-05	2.98001e-05
CCIN	881	1.72085	1.73565e-10	6.58728e-10
ARHGEF17	9828	1.72014	2.49071e-22	2.10409e-21
CEP295NL	100653515	1.71975	2.60189e-08	8.1738e-08
PLA2G4C	8605	1.71888	3.01066e-25	3.04416e-24
CHRM3-AS2	100506915	1.71808	3.3062e-05	7.70455e-05
SIGLEC14	100049587	1.71781	1.82147e-09	6.32983e-09
PLCL1	5334	1.71502	6.19349e-23	5.46452e-22
KCNG2	26251	1.71293	3.80743e-16	2.18829e-15
MCM10	55388	1.71155	7.35799e-23	6.45639e-22
KLHL4	56062	1.71095	8.69012e-07	2.37756e-06
SLC38A1	81539	1.70978	3.12916e-28	3.71526e-27
DAO	1610	1.70971	0.0144911	0.023871
UTRN	7402	1.70799	4.87756e-39	9.8249e-38
ACSM4	341392	1.70658	2.73675e-11	1.10288e-10
HAGLR	401022	1.70413	9.00483e-25	8.7961e-24
SOCS2-AS1	144481	1.70399	7.12335e-20	5.15141e-19
TPBGL	100507050	1.70364	6.83545e-11	2.67672e-10
KLHL2	11275	1.70337	1.34563e-44	3.46162e-43
IL7R	3575	1.70325	2.96719e-11	1.19293e-10
SH3BP5	9467	1.70301	2.99407e-16	1.73052e-15
RBM12B-AS1	55472	1.70295	4.19197e-17	2.55669e-16
CDK1	983	1.70289	8.39746e-19	5.69435e-18
RGS1	5996	1.70207	4.8798e-06	1.24235e-05
ANXA2R-OT1	648987	1.7019	1.94621e-45	5.26012e-44
PITPNC1	26207	1.70149	1.03642e-28	1.25795e-27
BGN	633	1.70121	6.11765e-15	3.24326e-14
PCDHA1	56147	1.7012	0.000885387	0.00174476
RECQL	5965	1.70049	3.97245e-22	3.31537e-21
HLX	3142	1.70043	3.24667e-27	3.64851e-26
COL18A1	80781	1.69743	5.79239e-25	5.7413e-24
TAFA4	151647	1.69635	0.0074346	0.0128302
PCDHB15	56121	1.69344	5.80262e-22	4.78734e-21
DUSP6	1848	1.6923	2.8041e-34	4.56749e-33
SOCS3	9021	1.69141	5.88511e-09	1.95423e-08
CXXC1P1	392459	1.69093	0.00787022	0.0135273
LRP2	4036	1.69078	0.00156456	0.00298023
SEPTIN11	55752	1.69047	9.35732e-23	8.14933e-22
PTPN4	5775	1.68913	7.88202e-33	1.19499e-31
RFPL3	10738	1.68832	1.7242e-06	4.58416e-06
OXTR	5021	1.68798	1.23384e-10	4.7368e-10
ACKR3	57007	1.68694	8.43851e-21	6.46759e-20
SULF2	55959	1.68678	3.68053e-34	5.95344e-33
CHST6	4166	1.68649	4.17994e-11	1.66353e-10
LZTS1-AS1	100874051	1.68623	0.00460255	0.00818821
HLA-DRB5	3127	1.68607	0.00560986	0.0098456
LINC00563	100861554	1.68515	0.000265457	0.000559612
LINC01729	101929207	1.685	0.012615	0.0209856
ZNF532	55205	1.684	2.99527e-53	1.15929e-51
TNFSF13B	10673	1.68355	1.11656e-17	7.0621e-17
ZFP92	139735	1.68287	5.8646e-18	3.76882e-17
GPR65	8477	1.68246	3.63145e-14	1.8237e-13
ITGAD	3681	1.68186	2.23601e-08	7.06424e-08
GIMAP5	55340	1.6812	3.52055e-05	8.17506e-05
SLC20A1	6574	1.67825	5.06299e-38	9.70262e-37
FIGNL2	401720	1.677	5.22666e-15	2.78473e-14
GDPD4	220032	1.67614	1.55445e-05	3.75702e-05
SLC6A1-AS1	100874090	1.67596	0.000108976	0.000239878
TXNDC2	84203	1.67569	4.65388e-06	1.18767e-05
VCAM1	7412	1.67559	1.09588e-13	5.30085e-13
P2RX5	5026	1.67493	2.67549e-08	8.39372e-08
HDX	139324	1.67365	1.2812e-32	1.9019e-31
FHOD1	29109	1.67353	2.20427e-37	4.11646e-36
C6orf118	168090	1.67325	0.0125471	0.0208822
GPR85	54329	1.67313	1.46189e-13	7.00778e-13
GIMAP4	55303	1.67309	2.30857e-27	2.61495e-26
UBD	10537	1.6729	4.90149e-10	1.79012e-09
MIR1469	100302258	1.67227	1.7288e-05	4.15685e-05
MEX3B	84206	1.67163	5.72781e-23	5.06062e-22
COL18A1-AS2	100874236	1.67033	0.0205816	0.0330415
MAN1A1	4121	1.66997	4.65106e-19	3.2009e-18
GARIN1B	84691	1.66985	9.01122e-05	0.000200074
SGO1	151648	1.66951	5.01928e-25	5.00015e-24
IMPG1	3617	1.66911	1.62161e-12	7.19834e-12
DIAPH3	81624	1.66584	2.20974e-21	1.75288e-20
INPP4B	8821	1.66572	1.5541e-24	1.4964e-23
HTR1B	3351	1.66533	1.13528e-06	3.07355e-06
MIR4489	100616284	1.66523	3.94853e-06	1.01453e-05
GNA12	2768	1.66503	3.06447e-48	9.40333e-47
FASLG	356	1.66467	1.43831e-10	5.4979e-10
OAF	220323	1.66386	2.06037e-19	1.4495e-18
MIR581	693166	1.66328	0.000869671	0.00171643
CLEC1A	51267	1.66287	9.67973e-26	1.00533e-24
INPP4A	3631	1.66219	1.21614e-56	5.51505e-55
UHRF1	29128	1.66032	2.20965e-24	2.10545e-23
TMEM163	81615	1.65929	1.44156e-09	5.05139e-09
CARD6	84674	1.65909	1.11066e-31	1.56617e-30
PREX2	80243	1.65883	2.1742e-12	9.55528e-12
BMP8B	656	1.6566	9.76143e-18	6.19998e-17
QRFPR	84109	1.65532	0.00779621	0.0134153
NAV1	89796	1.65526	1.31638e-43	3.22451e-42
BATF2	116071	1.65523	7.6859e-12	3.23629e-11
GNG7	2788	1.65522	1.78884e-17	1.11653e-16
MPPED2	744	1.65485	8.79056e-15	4.61068e-14
RGS18	64407	1.65436	1.18069e-11	4.89667e-11
GPR31	2853	1.65355	0.0010524	0.00205226
NOTCH4	4855	1.65287	1.57734e-16	9.25029e-16
TGFB1	7040	1.65284	1.487e-29	1.88895e-28
SGTB	54557	1.65237	4.33721e-29	5.36591e-28
MIR4326	100422945	1.65234	1.65473e-05	3.98697e-05
FLT1	2321	1.65155	3.98809e-26	4.23819e-25
IRF8	3394	1.65086	1.61861e-16	9.47934e-16
MEGF6	1953	1.65062	2.42138e-20	1.80193e-19
DEPP1	11067	1.65035	1.56027e-14	8.02597e-14
EGFL7	51162	1.64983	1.84134e-11	7.52934e-11
FCRL3	115352	1.64966	2.32532e-07	6.7268e-07
IGFBP7	3490	1.64722	1.11082e-20	8.42304e-20
HSF5	124535	1.64606	1.35149e-05	3.29131e-05
BMP2K	55589	1.64483	1.35106e-34	2.23478e-33
C2CD4A	145741	1.64463	4.05187e-09	1.36702e-08
ADCY1	107	1.64457	4.9894e-19	3.42822e-18
EBF2	64641	1.64453	6.80897e-10	2.46307e-09
TMEM44	93109	1.64439	8.74409e-23	7.63342e-22
A2M	2	1.64334	1.2465e-18	8.36286e-18
ADAMTSL2	9719	1.64264	8.59716e-14	4.19654e-13
USP13	8975	1.64223	5.39876e-39	1.08184e-37
MGAT4A	11320	1.64163	5.20128e-27	5.78166e-26
RANBP17	64901	1.64095	4.03149e-14	2.0159e-13
ZNF702P	79986	1.64047	1.12222e-20	8.50692e-20
AGPAT5	55326	1.64013	1.19907e-32	1.78932e-31
ARPC4-TTLL3	100526693	1.63972	0.0239624	0.0380281
HOMER3	9454	1.63962	1.13453e-21	9.19027e-21
STAB1	23166	1.63938	9.98473e-15	5.21248e-14
ARL15	54622	1.63848	5.22787e-24	4.87795e-23
EMILIN1	11117	1.63821	8.02624e-14	3.92608e-13
LINC00336	401253	1.63732	0.00344308	0.00624159
GZMB	3002	1.63731	7.335e-13	3.3417e-12
NLRC3	197358	1.6359	9.40596e-22	7.66294e-21
GPRIN1	114787	1.63571	3.59933e-20	2.65158e-19
CTSS	1520	1.63414	2.60003e-17	1.60913e-16
DLEU2	8847	1.63341	3.36594e-27	3.7809e-26
WASIR2	100132169	1.63134	0.00129317	0.00248938
CEP135	9662	1.63128	2.44624e-30	3.23413e-29
EFCAB14	9813	1.63123	1.05001e-37	1.98403e-36
ARHGAP31	57514	1.631	5.19469e-44	1.30106e-42
JSRP1	126306	1.63059	0.000267375	0.000563471
PGM5P2	595135	1.62871	2.86248e-25	2.89662e-24
TIGIT	201633	1.62866	2.18193e-12	9.5876e-12
OSBPL10	114884	1.62773	8.06953e-54	3.18579e-52
SLFN12	55106	1.62771	8.48999e-41	1.84192e-39
UNC5D	137970	1.62558	0.000716941	0.00143053
SNX10	29887	1.6252	2.00609e-16	1.16925e-15
ZNF93	81931	1.62445	7.36237e-29	9.03009e-28
CHST13	166012	1.62386	2.49102e-08	7.84089e-08
KRT24	192666	1.62353	0.00049333	0.0010047
SERPINA1	5265	1.62309	5.47277e-12	2.33239e-11
PCDHGA5	56110	1.6224	1.40334e-11	5.78169e-11
ZSCAN10	84891	1.62193	0.000109278	0.000240502
PDGFB	5155	1.62189	2.31344e-22	1.95756e-21
SLFN12L	100506736	1.62176	2.29086e-12	1.00576e-11
SVIL	6840	1.61963	6.21652e-45	1.62696e-43
LIMD2	80774	1.61938	1.01361e-18	6.84524e-18
RAG1	5896	1.61925	2.52774e-24	2.40051e-23
SLC35G2	80723	1.61839	2.77344e-27	3.12906e-26
DAPK1	1612	1.61822	4.27181e-30	5.58715e-29
PTPRN2	5799	1.61816	1.12351e-32	1.68048e-31
POLR3G	10622	1.61648	6.84988e-15	3.62095e-14
CD180	4064	1.61594	2.18294e-09	7.54402e-09
PDCD1	5133	1.61568	2.99472e-07	8.57422e-07
SCLT1	132320	1.61537	5.90565e-42	1.34382e-40
LAMC1	3915	1.61532	9.3733e-31	1.26202e-29
HELLS	3070	1.61517	1.35272e-27	1.55145e-26
DLC1	10395	1.61349	4.81264e-24	4.50199e-23
PDYN-AS1	727993	1.61325	0.0116417	0.0194765
ZGRF1	55345	1.61099	2.91672e-30	3.83833e-29
VOPP1	81552	1.61001	5.99867e-30	7.79401e-29
DYNLT5	200132	1.6097	1.55646e-14	8.00797e-14
GRK5	2869	1.6092	7.55237e-37	1.38022e-35
MERTK	10461	1.60867	3.69907e-18	2.41287e-17
HS3ST1	9957	1.60866	1.545e-21	1.23939e-20
CCR1	1230	1.60851	8.586e-11	3.33977e-10
WASHC4	23325	1.6078	5.30527e-27	5.89214e-26
E2F3	1871	1.60771	2.05524e-43	4.99141e-42
TLR7	51284	1.60708	1.19768e-09	4.23094e-09
ADGRE5	976	1.60695	7.90038e-27	8.69144e-26
CNTNAP1	8506	1.60642	1.57765e-24	1.51793e-23
IKZF3	22806	1.60625	2.33454e-10	8.77317e-10
CCDC168	643677	1.60611	2.30812e-07	6.6793e-07
PARP15	165631	1.60444	3.47579e-14	1.74896e-13
CA7	766	1.60435	0.00313064	0.00571157
TMEM30A	55754	1.60327	3.4844e-14	1.75294e-13
ZNF469	84627	1.6008	5.2182e-13	2.4021e-12
LBH	81606	1.60071	5.19235e-32	7.47827e-31
EFR3B	22979	1.60007	1.54451e-24	1.48773e-23
NCR1	9437	1.59951	0.00264125	0.00487707
DPYSL3	1809	1.5985	2.33218e-22	1.97277e-21
FOXS1	2307	1.59721	6.51824e-10	2.36224e-09
THY1	7070	1.59686	1.06846e-10	4.1285e-10
MARCKS	4082	1.59671	4.08645e-33	6.2734e-32
SLF1	84250	1.59582	1.04651e-32	1.56988e-31
CDK17	5128	1.5952	1.43817e-38	2.82366e-37
SMC2	10592	1.5948	3.06526e-27	3.45071e-26
UXS1	80146	1.5945	5.1867e-39	1.04149e-37
ARHGEF7	8874	1.59414	2.79203e-50	9.53833e-49
RAD51AP1	10635	1.593	2.94184e-20	2.18102e-19
ASAP1-IT2	100507117	1.59204	8.52994e-05	0.000189931
GIMAP6	474344	1.592	6.76093e-23	5.95492e-22
CIP2A	57650	1.59157	4.91052e-25	4.89752e-24
E2F7	144455	1.59154	4.66403e-20	3.40946e-19
SLC24A1	9187	1.59109	9.11883e-44	2.24656e-42
PCDHGB1	56104	1.59036	7.09464e-11	2.7761e-10
SLC12A3	6559	1.59027	4.03854e-05	9.31961e-05
SNORD11	692058	1.59016	1.64047e-05	3.95373e-05
SYNPO	11346	1.58949	2.97585e-20	2.20495e-19
TRAT1	50852	1.5892	5.17889e-08	1.58402e-07
GP5	2814	1.58878	2.49161e-07	7.18677e-07
FERMT3	83706	1.58858	1.75162e-22	1.4955e-21
LACC1	144811	1.5872	3.14936e-24	2.9798e-23
SPIB	6689	1.58712	2.40171e-08	7.56722e-08
MAP1B	4131	1.58705	7.8151e-33	1.18554e-31
POPDC2	64091	1.58686	7.71934e-17	4.62547e-16
LILRB2	10288	1.58654	1.54843e-08	4.96359e-08
TBC1D30	23329	1.58602	3.77944e-33	5.81253e-32
LY96	23643	1.58569	5.41971e-10	1.97334e-09
TREM1	54210	1.58432	1.12299e-05	2.75448e-05
GPR3	2827	1.58318	1.46587e-16	8.61238e-16
FOXD2-AS1	84793	1.58244	5.13786e-17	3.11727e-16
STMN1	3925	1.58159	2.28981e-27	2.59485e-26
NFILZ	105372267	1.58111	0.0038591	0.00694464
ZFPM2	23414	1.58045	5.51589e-22	4.56486e-21
SPRED1	161742	1.5801	1.26225e-39	2.58938e-38
ARL11	115761	1.57885	2.35737e-27	2.66905e-26
THEMIS	387357	1.57812	8.39624e-07	2.3001e-06
PRKAR1B-AS1	101926963	1.57741	1.85314e-19	1.30874e-18
SPAAR	158376	1.57679	7.43534e-12	3.13801e-11
OPRM1	4988	1.57603	0.021696	0.0346827
SH2D1B	117157	1.57536	3.75212e-08	1.16387e-07
FLRT2	23768	1.57448	1.5535e-38	3.04311e-37
CCDC71L	168455	1.5738	1.14459e-26	1.24741e-25
WWC2	80014	1.57367	6.26433e-33	9.54249e-32
SH3PXD2B	285590	1.57329	6.47016e-40	1.34451e-38
HAPLN3	145864	1.57185	2.89407e-19	2.01609e-18
B3GNT2	10678	1.57153	1.3568e-32	2.01063e-31
CCL4	6351	1.5707	2.16454e-09	7.48345e-09
MIR549A	693132	1.56967	0.0029435	0.00539165
ZNF618	114991	1.56937	7.07573e-33	1.07593e-31
LEF1-AS1	641518	1.56802	1.22743e-09	4.33007e-09
HMMR	3161	1.56702	3.16577e-15	1.7127e-14
CMTM3	123920	1.56683	2.74752e-26	2.93811e-25
TNFRSF21	27242	1.56615	2.86535e-22	2.41421e-21
PCDH9	5101	1.566	1.33819e-08	4.31718e-08
GBP4	115361	1.56598	5.84789e-19	4.002e-18
STARD13	90627	1.56585	1.43663e-37	2.69863e-36
HOXD1	3231	1.56531	1.60984e-13	7.70116e-13
CARD11	84433	1.56483	3.13594e-15	1.69728e-14
POGLUT2	79070	1.56427	6.26928e-27	6.92975e-26
KPNA2	3838	1.56231	8.95773e-26	9.31852e-25
MCM6	4175	1.56176	6.9009e-46	1.90124e-44
LINC02226	729506	1.56119	0.00397052	0.00712912
BRDT	676	1.56089	0.010768	0.0181131
TNC	3371	1.56026	6.92868e-12	2.92803e-11
RTL1	388015	1.56002	0.00564974	0.00991354
BATF3	55509	1.55987	1.06022e-12	4.77751e-12
CDH6	1004	1.55936	3.53179e-11	1.41437e-10
ERAP2	64167	1.55923	1.71089e-08	5.46657e-08
IQSEC1	9922	1.55808	9.66368e-40	1.99038e-38
CD69	969	1.55668	5.48723e-07	1.53152e-06
SYNJ1	8867	1.55598	3.36213e-31	4.62894e-30
GMFG	9535	1.55575	1.76568e-15	9.73117e-15
DOCK5	80005	1.55485	8.58785e-40	1.7745e-38
SHD	56961	1.55427	0.00272888	0.0050292
GRAMD1A	57655	1.55421	4.72779e-28	5.55667e-27
SLAMF7	57823	1.55389	2.81177e-11	1.1325e-10
CEP85L	387119	1.55389	9.54269e-25	9.31085e-24
PRF1	5551	1.55378	3.80152e-12	1.64143e-11
OLFML2A	169611	1.55274	3.29299e-23	2.93983e-22
NUF2	83540	1.55095	8.6281e-21	6.60697e-20
AKT3	10000	1.54992	3.39057e-18	2.21559e-17
SELL	6402	1.5497	2.25966e-13	1.06959e-12
INPP5D	3635	1.5496	7.40093e-35	1.24427e-33
MIR3605	100500853	1.54951	5.13805e-06	1.30499e-05
HOMER1	9456	1.54937	8.27826e-15	4.35267e-14
MAN2A1	4124	1.54821	1.37233e-30	1.83901e-29
SERPINI1	5274	1.54792	1.71836e-17	1.07359e-16
GPR45	11250	1.54786	2.69823e-05	6.35131e-05
COLEC12	81035	1.54755	1.21911e-13	5.87587e-13
LRRC71	149499	1.54732	1.71333e-07	5.01989e-07
GOLIM4	27333	1.5464	1.96959e-29	2.48106e-28
CNTLN	54875	1.54531	6.81502e-37	1.25082e-35
TRIM24	8805	1.54498	1.3982e-44	3.59324e-43
RDX	5962	1.54434	6.26215e-26	6.57846e-25
LCT-AS1	100507600	1.5438	0.00107509	0.00209394
OMG	4974	1.5433	4.91277e-11	1.94763e-10
TRIM71	131405	1.54237	0.00976232	0.0165266
CFAP74	85452	1.54214	2.15031e-08	6.80524e-08
FAM171A1	221061	1.54206	1.20664e-32	1.79852e-31
B4GALT5	9334	1.54168	4.63108e-48	1.41091e-46
HOXD4	3233	1.54084	1.47338e-18	9.8412e-18
TEP1	7011	1.54076	2.6955e-47	7.90208e-46
GOLGA8CP	729786	1.54035	0.000126884	0.000277343
SLAMF8	56833	1.54024	6.97637e-22	5.71812e-21
FERMT2	10979	1.54009	3.17646e-17	1.95502e-16
SLAMF6	114836	1.53985	1.71533e-10	6.51403e-10
ADCY4	196883	1.53979	2.18453e-18	1.44146e-17
CD96	10225	1.53868	2.85574e-12	1.24438e-11
LRRC4	64101	1.53852	6.68564e-16	3.78145e-15
KBTBD8	84541	1.53765	8.00973e-19	5.43787e-18
ZNF792	126375	1.53706	5.80145e-43	1.38274e-41
ITM2C	81618	1.53598	9.30528e-13	4.21013e-12
PCDHGB2	56103	1.53575	8.57228e-12	3.60064e-11
LY6G5C	80741	1.53435	4.79511e-05	0.000109697
DAZL	1618	1.53431	0.000959166	0.00188133
FPR2	2358	1.53394	7.92904e-07	2.1784e-06
SGCE	8910	1.53318	7.01628e-15	3.70586e-14
GBP7	388646	1.5329	9.77427e-07	2.66308e-06
PCDHGB3	56102	1.53276	2.04912e-08	6.49783e-08
LMNTD1	160492	1.53245	0.00318317	0.0058033
TREML2	79865	1.5313	7.8138e-09	2.56739e-08
GRPR	2925	1.53048	2.425e-07	7.0041e-07
ROCK1	6093	1.5301	1.90164e-35	3.28327e-34
BTBD19	149478	1.52978	4.59421e-18	2.97856e-17
FRG2C	100288801	1.52952	0.000310455	0.000647863
FHL3	2275	1.52746	5.36498e-29	6.61508e-28
NSG2	51617	1.52676	0.00118773	0.00229744
C4B	721	1.52602	1.12231e-10	4.32677e-10
PTPN22	26191	1.52599	4.49519e-12	1.93086e-11
ZFYVE16	9765	1.52584	2.47466e-27	2.7969e-26
GTSE1	51512	1.52548	3.23499e-22	2.71493e-21
RHOBTB1	9886	1.52546	1.97815e-35	3.41077e-34
RESF1	55196	1.52453	1.89634e-24	1.81637e-23
TTYH3	80727	1.52432	7.13538e-23	6.26964e-22
MIR4420	100616164	1.52421	0.000626254	0.00125929
PTPN12	5782	1.52413	1.97387e-33	3.07445e-32
LINC01973	400624	1.52339	0.00341868	0.00620043
HCLS1	3059	1.52242	1.25042e-20	9.45363e-20
C1QC	714	1.52196	3.43258e-08	1.06813e-07
LINC00525	84847	1.52122	0.000234372	0.000497411
ZFP69B	65243	1.52067	8.67088e-28	1.00255e-26
DNMT3A	1788	1.52032	1.88062e-40	4.00877e-39
C2CD4C	126567	1.51911	5.06764e-08	1.55087e-07
CEP290	80184	1.51872	6.46535e-27	7.13416e-26
SLC7A7	9056	1.51863	2.18195e-19	1.53209e-18
FER1L6-AS2	157376	1.51831	0.027804	0.0436088
CCR5	1234	1.51829	4.12046e-11	1.64063e-10
TENM3	55714	1.51808	1.22416e-08	3.95929e-08
TMEM171	134285	1.51701	2.42518e-09	8.35077e-09
HTR3E	285242	1.51666	0.0127634	0.0212119
TNFSF4	7292	1.51652	2.56227e-09	8.80388e-09
UNC80	285175	1.51593	1.06467e-07	3.1716e-07
ANKRD44-IT1	101927547	1.51593	8.05378e-05	0.000179908
MIR34A	407040	1.51529	2.06584e-06	5.4585e-06
FXYD6	53826	1.51519	2.2421e-12	9.84863e-12
DNAJC10	54431	1.51486	1.95574e-30	2.59502e-29
CD3G	917	1.51377	5.90525e-11	2.32704e-10
DEPDC1	55635	1.51362	3.26488e-11	1.30932e-10
IL32	9235	1.51307	3.40978e-12	1.47801e-11
TLR2	7097	1.51208	1.27428e-19	9.0794e-19
SIGLEC9	27180	1.50914	2.67467e-12	1.16826e-11
ANKRD36BP2	645784	1.50885	4.44416e-06	1.13686e-05
MGAT5	4249	1.50821	7.89447e-44	1.95055e-42
MIR5587	100847028	1.50765	5.72746e-05	0.000129878
LIM2	3982	1.50685	0.025014	0.0395334
PCTP	58488	1.50675	6.65642e-26	6.97549e-25
MTMR6	9107	1.5067	3.77262e-32	5.4797e-31
MIR4514	100616181	1.50653	0.00973611	0.016486
CCNA2	890	1.50609	8.81765e-23	7.6924e-22
SMARCA5	8467	1.50518	1.32833e-29	1.69325e-28
TSHZ3	57616	1.50478	4.58584e-23	4.07273e-22
FHIP2A	57700	1.50434	1.19519e-33	1.88334e-32
NPR1	4881	1.50363	2.39209e-13	1.12915e-12
SEMA3D	223117	1.50338	5.30752e-06	1.34563e-05
MYH10	4628	1.50308	7.90667e-35	1.32582e-33
SLCO2B1	11309	1.50261	5.52951e-15	2.9418e-14
FAT4	79633	1.50226	1.16457e-16	6.90228e-16
KMO	8564	1.50138	5.51861e-11	2.17904e-10
ADAMTSL1	92949	1.50129	4.09809e-09	1.38196e-08
ASCL3	56676	1.49979	0.00320743	0.0058446
ABHD17B	51104	1.49976	9.49149e-36	1.66341e-34
KCNA4	3739	1.4996	0.00067749	0.00135604
FAM106A	80039	1.499	0.000148602	0.000322531
PHOX2A	401	1.49874	0.00409571	0.00733694
HIP1	3092	1.49848	9.42976e-41	2.0389e-39
PHOSPHO1	162466	1.49675	1.60137e-12	7.10975e-12
CD8A	925	1.49647	4.89334e-10	1.78753e-09
TRPC6	7225	1.49617	1.52e-18	1.01473e-17
EOGT	285203	1.49546	7.5407e-40	1.56064e-38
SKAP2	8935	1.49508	1.44799e-26	1.57205e-25
YWHAH	7533	1.49482	1.68247e-39	3.424e-38
LXN	56925	1.4941	4.32441e-21	3.36369e-20
ITK	3702	1.49319	6.74768e-11	2.6442e-10
ZFHX3	463	1.493	5.54181e-40	1.15723e-38
SLC2A13	114134	1.49292	1.12972e-20	8.55876e-20
FLI1	2313	1.49157	8.49481e-27	9.32137e-26
ROCK2	9475	1.49124	3.42391e-37	6.36628e-36
SUCNR1	56670	1.49089	3.11919e-07	8.91764e-07
CCL21	6366	1.48945	1.50886e-06	4.0355e-06
GPR141	353345	1.48905	9.95527e-12	4.15922e-11
LINC01545	724087	1.4884	7.53195e-06	1.88405e-05
MRO	83876	1.48814	1.69663e-07	4.97267e-07
C3orf70	285382	1.48799	3.25335e-26	3.47178e-25
FAM111B	374393	1.48797	5.52585e-13	2.54052e-12
NR2F2	7026	1.48752	7.68407e-19	5.2237e-18
DCP2	167227	1.48663	1.75199e-30	2.33192e-29
ABCC9	10060	1.48654	1.15716e-12	5.19972e-12
ACSL5	51703	1.48576	7.62111e-27	8.3878e-26
REEP3	221035	1.48562	1.23349e-27	1.41851e-26
HIF1A	3091	1.48513	1.24456e-13	5.99402e-13
ST3GAL1	6482	1.48507	4.34222e-22	3.61692e-21
SMIM43	132332	1.48469	9.75705e-05	0.000215792
CDC25A	993	1.48215	1.06698e-21	8.6656e-21
TMEM244	253582	1.48107	0.00184548	0.00348093
NECTIN3	25945	1.48093	3.74872e-15	2.01615e-14
SNORA2B	677794	1.48076	0.000143975	0.000312859
RPP25	54913	1.4805	1.92816e-21	1.53427e-20
MTHFD1L	25902	1.48017	2.71271e-25	2.74723e-24
CADPS2	93664	1.47992	8.82086e-29	1.0788e-27
SEC14L1	6397	1.47866	4.40763e-38	8.4657e-37
CACNA1C	775	1.47782	1.69775e-16	9.93144e-16
ZNF521	25925	1.47777	3.62801e-22	3.03483e-21
SLC23A2	9962	1.47767	2.52703e-38	4.90512e-37
MIRLET7I	406891	1.47725	7.67479e-06	1.9181e-05
CIT	11113	1.4769	3.35648e-28	3.97779e-27
XRCC2	7516	1.47644	3.82913e-11	1.52867e-10
GZMA	3001	1.47637	7.71533e-09	2.53601e-08
HJURP	55355	1.47599	3.85803e-20	2.8389e-19
MIP	4284	1.47568	0.000244406	0.000517706
CDKN3	1033	1.47495	4.81913e-13	2.22519e-12
CRACD	57482	1.47489	3.20769e-09	1.09219e-08
HDGFL3	50810	1.47381	1.58319e-20	1.18922e-19
CAMKK2	10645	1.47353	2.9444e-41	6.50919e-40
CALU	813	1.47345	1.16689e-18	7.84314e-18
CYTOR	112597	1.47179	3.7513e-12	1.62057e-11
UBAP1L	390595	1.47174	2.02036e-10	7.63301e-10
KCNE4	23704	1.47042	1.98093e-13	9.41135e-13
KLF1	10661	1.46948	0.000168414	0.000363285
PLVAP	83483	1.46932	8.65374e-16	4.85178e-15
CD276	80381	1.46927	1.76877e-26	1.91141e-25
SOCS4	122809	1.46879	9.44452e-29	1.14958e-27
CABP4	57010	1.46697	1.23544e-20	9.34313e-20
PZP	5858	1.46695	3.57003e-08	1.10942e-07
LINC00460	728192	1.46585	0.00664257	0.0115387
MIR3648-2	103504731	1.46521	0.00538452	0.00947542
AKAP13	11214	1.46519	4.14736e-46	1.15129e-44
TMX3	54495	1.46501	1.91165e-25	1.95297e-24
CLIC2	1193	1.46455	1.58677e-14	8.15899e-14
CCL11	6356	1.46451	0.00366514	0.00661651
SIRPD	128646	1.46379	1.03776e-05	2.55447e-05
RAMP2	10266	1.46298	1.17899e-16	6.98454e-16
SH2D1A	4068	1.46291	1.43898e-07	4.24179e-07
GOLGA8F	100132565	1.46287	0.00062874	0.00126409
RB1	5925	1.46213	2.71325e-22	2.28907e-21
SPSB1	80176	1.46186	1.68618e-31	2.3391e-30
COL24A1	255631	1.46025	4.96008e-11	1.96486e-10
ZNF267	10308	1.45959	2.48191e-24	2.35786e-23
CDCP2	200008	1.45956	4.44925e-06	1.13782e-05
GARRE1	9710	1.45887	4.82345e-42	1.10444e-40
LMNB1	4001	1.45839	4.25834e-30	5.57237e-29
ACSL6	23305	1.4581	3.8322e-11	1.52965e-10
SNORD109A	338428	1.4581	0.000841813	0.0016653
LINC01117	102724224	1.45805	1.05585e-10	4.08222e-10
HECTD2	143279	1.45776	1.49027e-26	1.61727e-25
OMP	4975	1.45698	0.00272895	0.0050292
SLC19A1	6573	1.45677	1.36206e-13	6.54393e-13
GXYLT1	283464	1.4566	8.88961e-27	9.74624e-26
LYSMD2	256586	1.45588	2.15778e-31	2.98202e-30
CNTN6	27255	1.45559	0.000372318	0.000769813
COL8A1	1295	1.45559	1.20922e-07	3.59052e-07
THBS1	7057	1.45546	9.33467e-13	4.22268e-12
LINC01128	643837	1.45505	1.06841e-36	1.94276e-35
NPAT	4863	1.45501	6.64712e-22	5.45698e-21
SLC35B4	84912	1.45384	5.70085e-40	1.1885e-38
OR1K1	392392	1.45369	0.00137822	0.00264199
CCDC144A	9720	1.453	8.79444e-05	0.000195566
SCUBE1	80274	1.45296	0.00109637	0.00213298
GPR152	390212	1.45245	0.000887135	0.00174807
NTRK1	4914	1.45233	1.60687e-06	4.2842e-06
GPR171	29909	1.45156	9.98094e-10	3.55331e-09
SIPA1	6494	1.45124	2.51616e-14	1.27814e-13
CSF2RB	1439	1.45102	5.61624e-21	4.34086e-20
CCL3	6348	1.45094	1.00547e-06	2.736e-06
ZXDA	7789	1.45044	1.98191e-32	2.91005e-31
ZNF728	388523	1.4504	0.000190479	0.000408713
MIS18BP1	55320	1.44986	1.37875e-24	1.33357e-23
ADAM9	8754	1.4498	1.32409e-18	8.86486e-18
C1QTNF6	114904	1.44955	7.85968e-16	4.42206e-15
CYBB	1536	1.44955	1.02017e-10	3.94607e-10
PACC1	55248	1.44929	2.34994e-40	4.98841e-39
FCGR2A	2212	1.44899	5.06445e-12	2.16521e-11
ISG20	3669	1.44882	1.25416e-10	4.81123e-10
ELOVL2	54898	1.44832	4.15812e-07	1.17502e-06
PDE3A	5139	1.44797	1.69156e-12	7.50105e-12
AEN	64782	1.44714	3.40772e-31	4.68919e-30
CEP112	201134	1.44636	2.35967e-23	2.12288e-22
ZSWIM6	57688	1.44584	8.76146e-35	1.46245e-33
TBC1D1	23216	1.44577	4.0319e-34	6.50537e-33
GZMK	3003	1.44434	2.24638e-07	6.5058e-07
TRG-AS1	100506776	1.44403	6.75967e-12	2.86133e-11
HTRA4	203100	1.44378	4.39028e-08	1.35251e-07
ITPKB	3707	1.44356	1.43895e-28	1.73581e-27
APP	351	1.44262	1.34942e-31	1.88728e-30
SYDE1	85360	1.44262	3.62854e-23	3.23263e-22
CHST2	9435	1.44172	9.76785e-13	4.41397e-12
BTBD8	284697	1.44163	2.2269e-09	7.69074e-09
GIMAP2	26157	1.44096	2.61605e-19	1.82838e-18
H2AC4	8335	1.44051	0.0230985	0.0367687
LINC01410	103352539	1.44009	1.31149e-13	6.3033e-13
COL5A1	1289	1.43981	7.64417e-12	3.21977e-11
UBE2U	148581	1.43976	0.000160594	0.000347148
ZNF80	7634	1.43936	2.21896e-05	5.27209e-05
RNF133	168433	1.43911	0.000374405	0.000773629
LILRB4	11006	1.43826	1.87402e-08	5.96696e-08
PRKCE	5581	1.43784	8.78001e-36	1.54189e-34
CH25H	9023	1.43775	8.24601e-09	2.70385e-08
LRRC8C	84230	1.43771	7.28212e-26	7.61872e-25
KCNK13	56659	1.43757	3.29202e-13	1.53948e-12
APOA2	336	1.43626	0.00562108	0.00986394
BRCA1	672	1.43595	1.15844e-24	1.12473e-23
SLC26A5-AS1	101927870	1.43492	3.80584e-05	8.81038e-05
PRTFDC1	56952	1.43477	1.26522e-18	8.484e-18
SLA2	84174	1.43476	3.01158e-15	1.63342e-14
ENC1	8507	1.43454	3.17303e-22	2.6673e-21
NIBAN1	116496	1.433	7.41692e-28	8.62625e-27
KLF7	8609	1.43288	4.47641e-28	5.26605e-27
FSD1L	83856	1.43282	1.84239e-21	1.46738e-20
HLA-DQA1	3117	1.43242	9.07392e-05	0.000201396
CDH11	1009	1.43231	8.72859e-12	3.66449e-11
ZNF71	58491	1.43109	2.16425e-45	5.82483e-44
TRIM38	10475	1.43093	5.82903e-47	1.67247e-45
ADRA1B	147	1.4305	6.44735e-06	1.62225e-05
KIF4B	285643	1.42993	1.52547e-09	5.333e-09
GJA4	2701	1.42992	3.00092e-13	1.4054e-12
HK3	3101	1.42955	2.10067e-07	6.1052e-07
RTP3	83597	1.42951	0.00330252	0.00600548
DCLK2	166614	1.42947	1.24434e-21	1.00544e-20
SPRED2	200734	1.42937	2.1542e-34	3.52908e-33
LBR	3930	1.42936	7.35683e-35	1.23767e-33
AGPAT4	56895	1.42919	8.19639e-31	1.10589e-29
FAM107B	83641	1.42917	5.09653e-24	4.75887e-23
SNAI2	6591	1.42887	5.83034e-24	5.4302e-23
IFITM5	387733	1.42867	0.00280933	0.00516583
LHFPL2	10184	1.42847	2.61829e-17	1.62004e-16
CCDC175	729665	1.42838	0.00661042	0.0114868
ANTXR2	118429	1.42761	1.97666e-22	1.68203e-21
ADA	100	1.4276	3.86681e-20	2.84372e-19
MYZAP	100820829	1.42748	1.31735e-12	5.89161e-12
BMI1	648	1.42666	2.07113e-10	7.8177e-10
APC	324	1.42624	5.88567e-25	5.82699e-24
ABCG1	9619	1.42566	1.93559e-28	2.32071e-27
ECT2	1894	1.42543	2.45341e-22	2.07326e-21
PHTF2	57157	1.42529	6.32943e-24	5.88008e-23
MYO5A	4644	1.4246	1.64013e-26	1.77764e-25
RAPGEF2	9693	1.42441	1.54155e-32	2.27783e-31
GTSF1	121355	1.42392	0.000390076	0.000804649
MIR146A	406938	1.42351	6.82181e-05	0.000153539
MPHOSPH9	10198	1.4233	5.31292e-28	6.23009e-27
HCG9	10255	1.42327	0.0109666	0.0184228
DENND5A	23258	1.42315	1.46119e-33	2.29262e-32
SIRPG	55423	1.42308	3.88557e-10	1.43164e-09
CIBAR2	339145	1.4216	0.00162453	0.00308598
ARRB1	408	1.42151	1.45714e-39	2.97489e-38
DRAM1	55332	1.42149	9.18662e-19	6.22203e-18
PPP1R18	170954	1.42108	1.08236e-33	1.70766e-32
APOL4	80832	1.42106	1.71892e-13	8.19846e-13
MSN	4478	1.41952	2.75148e-49	8.91257e-48
SPOCD1	90853	1.41926	1.24865e-05	3.05102e-05
ZPLD1	131368	1.41822	0.00498757	0.00882991
GDF11	10220	1.41802	8.91987e-29	1.08987e-27
FAM171A2	284069	1.41796	1.09499e-12	4.93074e-12
IL2RB	3560	1.41599	6.72592e-15	3.55763e-14
TASL	80231	1.41482	2.04081e-13	9.68506e-13
EOMES	8320	1.41398	4.4877e-08	1.38086e-07
ESCO2	157570	1.41393	5.25453e-17	3.18504e-16
P2RY10	27334	1.41393	2.52861e-09	8.69172e-09
DIP2A-IT1	100862692	1.41389	2.33087e-05	5.52362e-05
CR1	1378	1.41381	6.75485e-06	1.69613e-05
ITGA10	8515	1.41356	3.85984e-17	2.35805e-16
RAPGEF1	2889	1.4132	1.7417e-38	3.40136e-37
TMEM51	55092	1.41277	3.55211e-34	5.75298e-33
LTBP1	4052	1.41247	4.85419e-14	2.41269e-13
SYT6	148281	1.41105	1.65568e-06	4.40882e-06
SPINDOC	144097	1.41036	1.0307e-28	1.25159e-27
APLNR	187	1.40985	5.7982e-08	1.76628e-07
C13orf46	100507747	1.40925	0.00128709	0.0024786
MID1	4281	1.40895	2.36406e-29	2.96921e-28
PCAT5	102578074	1.40889	0.0120642	0.0201387
FUT11	170384	1.40857	1.23285e-33	1.9415e-32
SSH1	54434	1.40714	6.18644e-44	1.53594e-42
CLEC9A	283420	1.40627	9.54075e-08	2.85309e-07
PURPL	643401	1.40609	0.00939895	0.0159505
MEFV	4210	1.40554	4.22008e-09	1.42048e-08
HHEX	3087	1.40345	3.65566e-22	3.05696e-21
CDC25B	994	1.4016	1.82632e-23	1.65701e-22
NCAN	1463	1.40136	0.0290072	0.0453516
IL18BP	10068	1.40017	2.22319e-20	1.65685e-19
MIR186	406962	1.40005	2.0176e-05	4.81646e-05
FOXN2	3344	1.39985	1.09979e-22	9.5118e-22
PHLDA1	22822	1.39972	5.7497e-26	6.05005e-25
ARSJ	79642	1.39933	4.94043e-17	3.00032e-16
HVCN1	84329	1.39904	9.91784e-27	1.08365e-25
FNDC9	408263	1.39888	0.00567207	0.00995001
CEACAM16	388551	1.39855	0.000514787	0.0010464
SAMHD1	25939	1.39784	2.33652e-17	1.44849e-16
NRXN2	9379	1.39706	3.0894e-12	1.34278e-11
PLEK	5341	1.39698	4.81646e-13	2.22476e-12
ADARB2	105	1.3968	0.000180928	0.000388871
IGDCC3	9543	1.39649	9.25508e-05	0.000205239
GABPB1	2553	1.39622	2.70239e-28	3.219e-27
OTOAP1	653786	1.39615	0.000161658	0.00034927
ABCG2	9429	1.39609	5.49992e-17	3.32591e-16
BZW1-AS1	101927795	1.39596	0.00244617	0.0045427
PGAP6	58986	1.39506	4.00114e-21	3.11982e-20
C3AR1	719	1.39479	4.78951e-10	1.75035e-09
EBI3	10148	1.39455	5.52273e-09	1.83938e-08
MIR1915HG	399726	1.39392	9.34266e-17	5.56951e-16
CLEC17A	388512	1.39355	0.00043389	0.000889512
HAMP	57817	1.39152	2.29676e-05	5.44785e-05
CLIC4	25932	1.39071	4.45156e-19	3.06689e-18
TNFSF18	8995	1.39057	0.0018782	0.00353796
EDEM3	80267	1.39012	5.6443e-24	5.26075e-23
FAM72D	728833	1.38966	1.15138e-31	1.62092e-30
TRAM2	9697	1.38926	9.32005e-27	1.02138e-25
OR3A1	4994	1.38845	0.00941287	0.015973
NIBAN3	199786	1.38782	5.51722e-08	1.68429e-07
DENND3	22898	1.38737	5.72135e-18	3.68138e-17
SELENON	57190	1.38731	8.32538e-33	1.257e-31
NLRC5	84166	1.38686	5.30282e-25	5.27032e-24
SDC3	9672	1.38667	6.34375e-19	4.32977e-18
TACC1	6867	1.38566	8.99716e-25	8.79196e-24
HOXB6	3216	1.38566	3.73559e-10	1.37975e-09
TMC7	79905	1.38524	9.25719e-21	7.07179e-20
DIAPH2	1730	1.3851	1.36708e-34	2.25982e-33
FIGNL2-DT	105369971	1.38472	7.91536e-07	2.17534e-06
TICAM2	353376	1.38369	0.000148019	0.000321347
EPB41L2	2037	1.3835	4.04223e-19	2.79315e-18
SLCO2A1	6578	1.38349	8.40705e-14	4.10807e-13
MIR1270	100302179	1.38345	0.00465227	0.00827034
XKR5	389610	1.38167	8.6789e-06	2.15475e-05
CALD1	800	1.38096	5.00014e-22	4.15145e-21
FAP	2191	1.38087	7.51728e-07	2.06927e-06
NRROS	375387	1.38017	9.05439e-17	5.40521e-16
TP53I3	9540	1.37958	2.82774e-19	1.97203e-18
BIRC6-AS2	103752586	1.37957	4.30644e-05	9.90303e-05
BUB1B	701	1.37927	5.41357e-16	3.081e-15
DENND4A	10260	1.37898	3.92698e-27	4.38801e-26
IL21-AS1	100996941	1.37873	0.00889499	0.0151524
PARPBP	55010	1.37777	8.08875e-18	5.15804e-17
CCDC144B	284047	1.37743	5.99106e-06	1.51115e-05
HLA-DRB1	3123	1.37735	0.00335721	0.00609886
RSPH6A	81492	1.37729	0.00102964	0.00200987
ADGRE1	2015	1.37716	0.00102075	0.00199363
OSBPL3	26031	1.37686	9.38396e-35	1.56534e-33
C1QB	713	1.37661	8.06415e-07	2.21339e-06
PGS1	9489	1.37621	6.86965e-39	1.36869e-37
HASPIN	83903	1.37611	1.57935e-18	1.05216e-17
KRT222	125113	1.37577	6.33321e-07	1.75635e-06
PLXNC1	10154	1.37572	2.84631e-19	1.98444e-18
LAG3	3902	1.37565	8.25446e-10	2.96337e-09
APAF1	317	1.37447	4.53986e-27	5.0552e-26
FOXC2	2303	1.37303	1.28368e-06	3.46034e-06
MIR6753	102465451	1.37237	0.000293445	0.00061447
H1-5	3009	1.37177	0.0188832	0.030533
ADA2	51816	1.37141	3.66858e-13	1.7112e-12
FHAD1-AS1	101927417	1.36862	1.04703e-06	2.84364e-06
MIR1281	100302237	1.36859	0.000151315	0.000328142
SLC35A5	55032	1.36831	3.33186e-21	2.61386e-20
SKIL	6498	1.36806	5.60464e-19	3.84065e-18
ACTR2	10097	1.36725	4.97429e-20	3.62799e-19
BCL2A1	597	1.36641	4.20726e-07	1.18865e-06
SLC24A2	25769	1.36562	0.0143333	0.0236324
TXNDC5	81567	1.36543	3.58719e-10	1.3271e-09
SCN1B	6324	1.36521	7.23239e-11	2.82913e-10
CD2	914	1.36502	3.81564e-09	1.29045e-08
TRAF5	7188	1.36472	1.32853e-21	1.07144e-20
TIMELESS	8914	1.36383	1.17146e-42	2.76383e-41
FLACC1	130540	1.36371	2.8826e-15	1.56545e-14
LRRC34	151827	1.36333	5.39323e-22	4.46624e-21
PCDHA2	56146	1.36305	0.000508886	0.00103498
PARP14	54625	1.36275	2.40767e-20	1.79278e-19
TTK	7272	1.36243	4.67302e-12	2.00422e-11
LINC02582	100505817	1.36241	0.00314845	0.00574324
CTBP2	1488	1.36193	9.88888e-47	2.81213e-45
CCDC82	79780	1.36131	6.37744e-32	9.11337e-31
KIF23	9493	1.36076	1.47683e-16	8.67076e-16
GIT2	9815	1.36025	1.30402e-44	3.36133e-43
C15orf39	56905	1.36008	1.24014e-24	1.20268e-23
ARHGAP11A	9824	1.35886	5.76111e-18	3.7051e-17
SMIM21	284274	1.3586	0.01167	0.0195175
PPP1R2B	153743	1.35802	3.6273e-20	2.67142e-19
CR2	1380	1.35791	0.00366078	0.00660958
KLF12	11278	1.35714	1.33943e-19	9.53304e-19
PIK3C2A	5286	1.35637	1.45127e-18	9.69606e-18
PYHIN1	149628	1.3558	3.23725e-08	1.01004e-07
RASA3	22821	1.35497	2.02055e-26	2.17695e-25
SYT16	83851	1.35494	0.0274287	0.0430756
HBEGF	1839	1.35435	9.9557e-12	4.15922e-11
ZNF85	7639	1.35373	3.97888e-26	4.23016e-25
WASF1	8936	1.35365	9.26693e-37	1.68874e-35
RAP1B	5908	1.35344	3.2359e-23	2.88986e-22
LNPEP	4012	1.35286	1.54937e-13	7.41463e-13
MANEA	79694	1.3521	7.09714e-15	3.74779e-14
APLP2	334	1.35176	1.09065e-39	2.24274e-38
DSCC1	79075	1.35123	3.86779e-28	4.57106e-27
CXXC4	80319	1.35077	1.54337e-08	4.94798e-08
VPS13C	54832	1.35053	2.72709e-20	2.02532e-19
CXCR6	10663	1.3504	2.28198e-12	1.00204e-11
CPNE8	144402	1.35031	2.24099e-20	1.66963e-19
GNAI2	2771	1.34953	1.07581e-31	1.51787e-30
POLK	51426	1.34894	1.03609e-18	6.99148e-18
PALM2AKAP2	445815	1.34816	7.45893e-06	1.86652e-05
LINC02181	440390	1.34681	0.00935034	0.0158764
LCK	3932	1.3466	3.22892e-10	1.19866e-09
PKN2-AS1	101927891	1.34617	6.67281e-08	2.02093e-07
PLPPR4	9890	1.34542	9.50682e-11	3.68731e-10
RASSF3	283349	1.34536	1.40915e-32	2.087e-31
CCDC144NL-AS1	440416	1.34518	0.000781733	0.0015516
TMEM52B	120939	1.34475	0.00256938	0.00475291
LUZP1	7798	1.34397	3.49247e-36	6.22281e-35
CCDC150	284992	1.34381	5.1244e-20	3.73428e-19
LYSMD3	116068	1.34251	6.31317e-17	3.79887e-16
ARMCX3	51566	1.34229	5.30838e-27	5.89304e-26
SOX4	6659	1.3422	2.7486e-29	3.43702e-28
SKA1	220134	1.34131	1.85646e-11	7.5863e-11
MIR6881	102465530	1.3412	0.019824	0.0319272
DAB2	1601	1.34078	2.53161e-12	1.10743e-11
LY86	9450	1.34035	1.17116e-08	3.79313e-08
HOXB5	3215	1.33998	4.92959e-08	1.51048e-07
MIR553	693138	1.33974	0.00203632	0.0038184
MIB1	57534	1.33927	6.21974e-25	6.14349e-24
REP15	387849	1.33918	1.37283e-16	8.088e-16
CDKL1	8814	1.33908	1.04942e-29	1.34643e-28
SIRPB2	284759	1.33887	1.47151e-13	7.05255e-13
ADORA2A	135	1.33886	1.71017e-05	4.11322e-05
BTN3A3	10384	1.33759	1.05838e-27	1.21987e-26
MLKL	197259	1.33756	2.60908e-28	3.11219e-27
ASCC3	10973	1.3374	1.87254e-21	1.49047e-20
MGAT2	4247	1.33641	4.2761e-29	5.29286e-28
CPNE2	221184	1.33539	1.6663e-35	2.88472e-34
MIR3145	100423001	1.33529	0.000368748	0.000762924
CD22	933	1.33461	7.85198e-06	1.95913e-05
GPR161	23432	1.33427	6.03197e-33	9.19947e-32
CLEC4C	170482	1.3341	0.00807617	0.0138561
ABHD17C	58489	1.33321	2.84535e-18	1.86454e-17
TLR10	81793	1.33263	2.06459e-06	5.45576e-06
NEDD1	121441	1.33204	1.34049e-24	1.29706e-23
SBK3	100130827	1.33199	0.000263199	0.00055508
ZNF793-AS1	101927720	1.33198	2.52652e-16	1.46657e-15
CFAP206	154313	1.33162	1.143e-11	4.74804e-11
SPRY4-AS1	101926941	1.33134	4.64477e-06	1.18558e-05
PLAT	5327	1.33104	4.9156e-15	2.62281e-14
ICAM2	3384	1.33091	1.97816e-15	1.08625e-14
GBP1P1	400759	1.33069	1.24569e-16	7.36263e-16
LINC01087	101927994	1.33048	0.00640602	0.0111535
SMOC1	64093	1.3299	2.27876e-07	6.59734e-07
SPAG4	6676	1.32985	1.31722e-06	3.54776e-06
PDE6G	5148	1.32903	5.82995e-07	1.62135e-06
CCL18	6362	1.32814	0.00052661	0.00106916
ARSB	411	1.32812	4.86061e-21	3.77047e-20
RP2	6102	1.32776	4.03396e-19	2.78894e-18
TSN	7247	1.32761	1.63206e-27	1.86599e-26
PDE8A	5151	1.32734	7.06281e-44	1.75013e-42
WDR7	23335	1.32699	2.66142e-29	3.32963e-28
AOAH-IT1	100874264	1.32699	0.0257171	0.0405666
TRPM5	29850	1.32695	0.00116204	0.0022515
H2BC14	8342	1.32655	0.0275814	0.0432968
LINC01237	101927289	1.32652	0.00136524	0.00261907
EVI2A	2123	1.32623	1.34579e-09	4.73391e-09
ATM	472	1.32609	1.9851e-19	1.39885e-18
MUC6	4588	1.32579	0.00712273	0.0123235
PIP4K2A	5305	1.32573	5.1695e-36	9.1221e-35
ZNF708	7562	1.32551	7.2312e-28	8.41789e-27
RNF175	285533	1.32503	5.63008e-16	3.20137e-15
GRP	2922	1.32453	0.0105218	0.0177245
YEATS2	55689	1.32372	3.28158e-44	8.27566e-43
PHF19	26147	1.32274	5.75612e-37	1.05875e-35
SPDL1	54908	1.32232	2.8458e-27	3.20788e-26
RASSF2	9770	1.32232	1.53017e-17	9.57883e-17
ITPRIPL1	150771	1.32208	1.54164e-19	1.09387e-18
MTBP	27085	1.32205	4.78912e-23	4.24885e-22
BIN2	51411	1.32193	2.80753e-15	1.52565e-14
PAG1	55824	1.32136	2.67328e-25	2.70945e-24
B3GNT7	93010	1.32101	1.65363e-08	5.28954e-08
SDAD1-AS1	101928809	1.32079	0.00423007	0.00756176
OPRL1	4987	1.31939	3.5761e-10	1.32332e-09
STK17B	9262	1.31916	3.9392e-18	2.5682e-17
FAM72B	653820	1.31868	3.43734e-26	3.66202e-25
CD53	963	1.31842	2.01587e-11	8.21283e-11
C4orf48	401115	1.3183	2.26477e-09	7.81836e-09
SLC45A4	57210	1.31827	1.54274e-13	7.38564e-13
ZNF583	147949	1.31761	3.39223e-27	3.80708e-26
MIR3176	100423037	1.31697	0.000292304	0.000612231
CYGB	114757	1.31686	4.39057e-12	1.8875e-11
C2	717	1.31584	2.43418e-08	7.66575e-08
C4A	720	1.31556	1.13008e-08	3.6661e-08
PWAR1	145624	1.31542	0.00020685	0.000442176
ZNF385D-AS1	100874216	1.31536	0.0155312	0.0254552
CRPPA-AS1	100506025	1.31501	0.000594772	0.00119985
KIF2A	3796	1.31487	1.48524e-21	1.19406e-20
ITGAL	3683	1.31476	1.49955e-09	5.24596e-09
FIRRE	286467	1.3143	2.83285e-07	8.13168e-07
SLC7A11-AS1	641364	1.31411	0.00817439	0.0140143
FYN	2534	1.3141	9.76644e-33	1.46938e-31
SRFBP1	153443	1.31405	4.42934e-20	3.24438e-19
SIRPB1	10326	1.31351	1.01546e-15	5.66964e-15
CCN4	8840	1.31161	1.91077e-09	6.62754e-09
CDCA2	157313	1.31123	4.00877e-14	2.00572e-13
LINC00299	339789	1.31071	0.000175149	0.000377082
WDHD1	11169	1.3103	9.3488e-21	7.13539e-20
SEPTIN6	23157	1.3097	6.18229e-27	6.83654e-26
CHROMR	101927027	1.30911	4.34745e-27	4.84728e-26
LRRC55	219527	1.30868	6.34733e-06	1.59803e-05
HSPA5	3309	1.30797	3.96937e-32	5.75244e-31
CD247	919	1.30699	1.39103e-11	5.7356e-11
NCEH1	57552	1.3068	3.81111e-17	2.33106e-16
TTC7B	145567	1.30605	4.98782e-40	1.0441e-38
KNTC1	9735	1.30561	1.5368e-21	1.23358e-20
BRSK1	84446	1.30522	7.75776e-08	2.33654e-07
ATP8B1-AS1	100505549	1.30509	1.26351e-22	1.08819e-21
FXYD2	486	1.30502	7.82412e-06	1.95275e-05
TGFBR2	7048	1.3048	2.53091e-18	1.66445e-17
CHIC1	53344	1.30342	1.00284e-21	8.15186e-21
SCG2	7857	1.30326	0.0044059	0.00785635
RAB42	115273	1.30275	2.46628e-09	8.48884e-09
KLRC4	8302	1.30176	0.00057944	0.00117058
LINC00629	100506757	1.30129	7.09668e-05	0.000159459
ZMAT3	64393	1.30117	3.79942e-21	2.96976e-20
LILRA1	11024	1.29974	5.1209e-05	0.000116847
ZNF43	7594	1.29918	1.60778e-25	1.65241e-24
CREB5	9586	1.29905	1.42175e-16	8.36274e-16
ATRX	546	1.29902	1.83644e-18	1.21774e-17
MIR421	693122	1.29891	0.000288078	0.000603923
IFNAR2	3455	1.29851	3.85029e-27	4.30607e-26
MEX3A	92312	1.29834	8.53277e-21	6.53788e-20
CASP7	840	1.29815	5.84361e-27	6.4704e-26
DCBLD1	285761	1.29783	1.89675e-34	3.11928e-33
GALNT8	26290	1.29675	3.962e-06	1.01789e-05
PPFIA2-AS1	102724663	1.29657	0.00723933	0.0125125
AURKA	6790	1.29652	3.85658e-17	2.35719e-16
ZNF486	90649	1.29651	1.14721e-19	8.1991e-19
FEZ1	9638	1.29621	1.23606e-15	6.87292e-15
ANKRD20A11P	391267	1.29621	0.0303845	0.0473058
RNF122	79845	1.29326	1.18246e-22	1.01976e-21
UGGT2	55757	1.2932	7.55264e-22	6.18057e-21
KIF15	56992	1.29312	1.57138e-17	9.83198e-17
MTUS1	57509	1.29288	6.82103e-25	6.72186e-24
ANKRD44	91526	1.2924	4.45499e-20	3.26131e-19
KERA	11081	1.29211	0.0159758	0.0261454
AP2B1	163	1.29127	2.03622e-41	4.55254e-40
PTPRK	5796	1.29112	9.63578e-18	6.1217e-17
MIR130B	406920	1.29083	0.0116858	0.0195415
TMEM252	169693	1.29029	7.67844e-07	2.11234e-06
AFAP1	60312	1.2899	8.2626e-27	9.07434e-26
CDC27	996	1.28913	5.64336e-24	5.26075e-23
SP4	6671	1.28864	7.56781e-22	6.19101e-21
RAG2	5897	1.28821	0.0215131	0.0344162
KLRD1	3824	1.28815	4.89429e-08	1.50002e-07
CUBN	8029	1.28799	4.33405e-18	2.81559e-17
CMBL	134147	1.28791	4.58501e-12	1.96779e-11
ERCC6L	54821	1.28762	2.01031e-14	1.02606e-13
SNAI1	6615	1.28752	3.12301e-07	8.92657e-07
GRM1	2911	1.2874	3.88054e-05	8.976e-05
LINC00205	642852	1.28736	2.67883e-23	2.40158e-22
PPFIBP1	8496	1.28721	1.22224e-30	1.64131e-29
NT5DC4	284958	1.28711	2.20048e-05	5.22965e-05
XPR1	9213	1.28682	7.23136e-26	7.5687e-25
NOTCH1	4851	1.28669	2.33984e-23	2.10725e-22
LINC01864	101928886	1.28654	0.0128877	0.0213991
LRRC25	126364	1.28596	5.67277e-09	1.88665e-08
SANBR	84542	1.28587	1.97516e-30	2.61944e-29
BVES-AS1	154442	1.28528	1.37614e-07	4.06402e-07
COL12A1	1303	1.28526	8.06403e-08	2.42593e-07
LINC01587	10141	1.28462	0.000646538	0.00129804
MS4A1	931	1.28423	0.00582309	0.0102003
TRIM22	10346	1.28296	5.10819e-14	2.53402e-13
SEC23A	10484	1.28293	8.50929e-20	6.12086e-19
NLN	57486	1.28276	3.01414e-25	3.04648e-24
ECE1	1889	1.28264	2.13486e-23	1.92875e-22
CFAP58	159686	1.28249	1.80505e-17	1.12638e-16
BISPR	105221694	1.28199	4.30319e-16	2.46273e-15
KCNJ6	3763	1.28198	0.00554184	0.00973823
IGLL5	100423062	1.28127	0.0218386	0.0348997
TMCO3	55002	1.28068	1.36569e-29	1.73915e-28
[truncated: 12,706 more rows]

## Sheet: 2-C3vsC1
	entrez	log2FoldChange	pvalue	padj
IBSP	3381	5.70722	1.2075e-12	2.82536e-11
STATH	6779	5.22362	2.56432e-06	1.67764e-05
SNORA38	677820	4.5322	6.99211e-05	0.000326051
OTOG	340990	4.38946	1.8073e-09	2.26097e-08
LYPD4	147719	4.24601	0.00473049	0.0134697
C3P1	388503	4.09697	4.80543e-05	0.000233233
SPINK9	643394	3.89672	9.91513e-07	7.13838e-06
LINC02475	100506827	3.80936	1.37528e-05	7.62849e-05
MAGEA4	4103	3.75606	0.000123268	0.00054464
MMP12	4321	3.67958	4.85544e-08	4.66624e-07
DMP1	1758	3.64612	1.43376e-05	7.93358e-05
HTN3	3347	3.51179	0.000802669	0.00286473
EIF4E1B	253314	3.43058	0.000376487	0.0014666
PRSS2	5645	3.43003	2.21919e-05	0.000117658
ALPP	250	3.39101	1.9997e-08	2.06498e-07
ADAMTS20	80070	3.32435	0.000311198	0.00124415
KIF25-AS1	100505879	3.3151	1.45935e-07	1.27277e-06
K14	HHV8GK18_gp83	3.22964	9.66639e-06	5.55978e-05
H2BC3	3018	3.22151	1.63353e-05	8.91315e-05
GNAT3	346562	3.20358	9.95625e-08	8.98642e-07
F13B	2165	3.15698	8.16184e-06	4.78214e-05
SCUBE1	80274	3.12647	1.38152e-10	2.15368e-09
ARMC3	219681	3.09925	0.000271386	0.00110095
NLRP5	126206	3.0699	0.0182147	0.0429165
ALPG	251	3.06967	2.46096e-06	1.61931e-05
HTR3C	170572	3.05279	6.71994e-06	4.02667e-05
OR1G1	8390	3.02844	0.0018537	0.00598564
HOXD13	3239	3.02374	6.73792e-06	4.03648e-05
RNA5S6	100169757	3.02056	0.00394187	0.0115426
HSPE1-MOB4	100529241	3.00929	0.00371855	0.0109642
H2AB3	83740	2.99904	1.9955e-08	2.06234e-07
GOLGA6L2	283685	2.9984	0.0132679	0.0327396
LY6H	4062	2.99456	6.6936e-07	5.00583e-06
K15	HHV8GK18_gp85	2.9914	0.000286734	0.00115611
SLC35G3	146861	2.98656	0.000307974	0.00123224
ORF74	HHV8GK18_gp84	2.89063	4.29155e-07	3.36285e-06
GHSR	2693	2.88334	0.000137571	0.000600853
MROH5	389690	2.87327	1.0889e-10	1.72758e-09
H2BC14	8342	2.8548	2.88896e-05	0.00014836
GAGE12G	645073	2.84855	0.00654961	0.0178764
ORF72	HHV8GK18_gp82	2.83787	2.71731e-05	0.000140417
LINC00606	285370	2.83332	1.22923e-05	6.88233e-05
IL13RA2	3598	2.80494	2.03573e-07	1.72158e-06
MYH6	4624	2.79828	0.000943566	0.00330275
LINC00559	100874187	2.7967	0.00938938	0.0244258
ORF75	HHV8GK18_gp86	2.78074	0.000186207	0.000785509
RAB4B	53916	2.77139	0.0145717	0.0354512
TMEM235	283999	2.75835	1.12754e-07	1.00684e-06
ABCC13	150000	2.74121	0.000489257	0.00185126
LINC02685	221122	2.73786	0.00129764	0.00437894
LINC01518	101929397	2.73345	0.00461061	0.0131828
RNU6-1	26827	2.71087	4.80779e-05	0.000233302
ARHGAP36	158763	2.70899	1.80662e-05	9.74528e-05
LINC01915	729950	2.70213	2.01771e-15	7.31362e-14
CCNYL2	414194	2.6742	1.01316e-06	7.27336e-06
VAT1L	57687	2.67088	6.81606e-07	5.08983e-06
CKLF-CMTM1	100529251	2.66864	0.000385204	0.00149545
ECEL1P2	347694	2.64833	1.85474e-05	9.99407e-05
PMCH	5367	2.64109	2.5884e-07	2.12868e-06
K12	HHV8GK18_gp79	2.63919	0.000344429	0.00135774
MS4A15	219995	2.63391	0.000160227	0.000686888
TMEM82	388595	2.61756	1.83047e-06	1.2389e-05
MIR581	693166	2.6153	6.85261e-06	4.0954e-05
NKX2-5	1482	2.61167	0.00311416	0.00940436
RNASE9	390443	2.60813	0.00210695	0.00670243
PIWIL1	9271	2.60638	0.0030479	0.00923649
LRRC38	126755	2.60304	5.12352e-06	3.1506e-05
MMP13	4322	2.58154	7.44039e-08	6.91212e-07
H2AB2	474381	2.58124	1.90038e-07	1.61474e-06
H2AC12	85235	2.57476	0.000508054	0.00191517
LIPC-AS1	101928694	2.57317	1.73836e-07	1.48969e-06
MSANTD3-TMEFF1	100526694	2.57082	0.000100958	0.000455455
K13	HHV8GK18_gp80	2.57025	2.29487e-05	0.000121005
SCN2A	6326	2.5686	2.83862e-10	4.1348e-09
FGB	2244	2.56232	0.00556084	0.015517
GRM8	2918	2.55749	4.32646e-07	3.38703e-06
LINC01648	101929406	2.55238	2.40902e-05	0.000126519
MIR503	574506	2.54736	1.37978e-08	1.46649e-07
LINC02347	100128554	2.53863	2.4335e-05	0.000127644
SCARNA3	677679	2.52312	5.06799e-05	0.000244698
LINC01583	101929690	2.50849	3.62087e-07	2.88508e-06
ESM1	11082	2.50398	3.4272e-05	0.000172862
LANA	HHV8GK18_gp81	2.50151	9.17923e-08	8.34515e-07
SCN1A-AS1	101929680	2.49868	1.40703e-08	1.49354e-07
KCTD16	57528	2.49436	1.08765e-07	9.73988e-07
RIPOR3-AS1	100506175	2.47245	0.00262786	0.00810959
MMP9	4318	2.45969	7.31332e-09	8.22233e-08
ORF2	HHV8GK18_gp09	2.45255	2.54798e-05	0.000132843
QRFPR	84109	2.43618	0.000356683	0.00139901
CLDN14	23562	2.42488	2.45879e-08	2.49894e-07
RNASE10	338879	2.42394	0.00334267	0.00998741
KISS1	3814	2.41185	0.000112665	0.000503328
CBLN4	140689	2.40623	1.53841e-05	8.44018e-05
K2	HHV8GK18_gp10	2.40558	0.00131669	0.00443489
FBXW12	285231	2.4002	0.00036499	0.00142647
GYPA	2993	2.39363	0.00141314	0.00471731
MANCR	100216001	2.39336	4.16963e-08	4.05061e-07
MIR548P	100302288	2.38586	0.00719385	0.0193671
GPR78	27201	2.38309	0.00129869	0.00438131
OIT3	170392	2.38236	1.47637e-09	1.87124e-08
CTCFL	140690	2.382	0.0023779	0.0074449
UNC5D	137970	2.37964	5.64738e-06	3.43735e-05
IQCA1	79781	2.37241	8.37663e-08	7.68793e-07
H2BC7	8343	2.37045	0.000253925	0.00103851
CHRNA7	1139	2.36392	1.55372e-11	2.91706e-10
TRIM71	131405	2.36305	0.000521077	0.0019572
VTRNA1-2	56663	2.36169	0.00804373	0.0213752
RXFP3	51289	2.36144	0.00258018	0.00798616
HOXD12	3238	2.35449	0.0101682	0.0261373
LRRC3B	116135	2.35391	2.04603e-05	0.0001091
CLEC4G	339390	2.3377	7.7783e-06	4.58096e-05
ACOD1	730249	2.33728	4.38293e-05	0.000214763
RAG2	5897	2.33512	0.000317367	0.00126498
SERTM1	400120	2.33452	0.00135465	0.0045493
PDILT	204474	2.33344	0.00535948	0.015022
LINC00507	100862680	2.33321	0.00527621	0.0148217
FAR2P4	440910	2.33273	0.0148549	0.0360423
RMST	196475	2.3294	0.0192913	0.0450879
CHRNA1	1134	2.32602	3.01106e-06	1.95007e-05
CFAP54	144535	2.29759	5.25106e-10	7.19346e-09
COL22A1	169044	2.29592	3.0976e-05	0.000157985
MIR3117	100422871	2.28363	4.65824e-06	2.8943e-05
SCN3A	6328	2.2827	1.09005e-08	1.18619e-07
LINC01182	101929071	2.27817	1.13665e-08	1.22943e-07
vIRF-2	HHV8GK18_gp65	2.2712	0.000853157	0.00302341
PTCHD4	442213	2.26959	8.48097e-09	9.43362e-08
MYBPC2	4606	2.26804	0.000815928	0.00290379
PCDH17	27253	2.26425	6.37931e-09	7.26998e-08
LINC00642	400238	2.25159	0.00214603	0.00680688
H4C13	8368	2.2444	0.0017276	0.00563649
APLN	8862	2.24151	1.31813e-07	1.15846e-06
RNU6-9	101954271	2.23298	0.00120845	0.00411114
F2RL3	9002	2.22406	5.24465e-10	7.19253e-09
H3C7	8968	2.21946	0.0001494	0.000646214
ETS1-AS1	101929517	2.21639	3.52035e-07	2.81572e-06
HMGA2	8091	2.2163	1.68591e-09	2.11862e-08
ORF63	HHV8GK18_gp71	2.2098	0.0067351	0.018299
TBXT	6862	2.2077	0.00600976	0.0166126
CACNG8	59283	2.19529	1.91894e-09	2.38754e-08
ARPC4-TTLL3	100526693	2.19499	0.006853	0.0185771
SYNJ2BP-COX16	100529257	2.19152	0.00414681	0.012054
RPL17-C18orf32	100526842	2.18668	0.000136754	0.000598011
SOX11	6664	2.18041	0.000135477	0.000593464
TEX36	387718	2.16581	0.0115721	0.0291721
LINC00538	100861504	2.16472	0.00113242	0.00388092
GDF15	9518	2.15964	1.99701e-08	2.06305e-07
SCN1A	6323	2.15834	6.60333e-06	3.96247e-05
NME1-NME2	654364	2.15675	0.00061675	0.00227165
TAFA4	151647	2.1476	0.00244899	0.00763839
CEMIP	57214	2.14635	3.94379e-07	3.12254e-06
HTR3E	285242	2.1455	0.00175659	0.00572066
CYP2A13	1553	2.14439	0.0159783	0.0384003
RASGRF2-AS1	102524628	2.14405	4.88938e-09	5.66992e-08
LINC01929	101927229	2.14342	5.57815e-06	3.40135e-05
CYP4F30P	100132708	2.14151	0.0102238	0.0262481
H3C12	8356	2.13844	0.000222575	0.000922479
SEMA7A	8482	2.13753	3.56244e-14	1.07659e-12
SPIC	121599	2.13013	0.000129987	0.000571711
LINC01729	101929207	2.12637	0.00471766	0.0134408
NR1H4	9971	2.1256	0.00937072	0.0243899
BCAT1	586	2.12009	3.85177e-11	6.69072e-10
SEMA3A	10371	2.11101	2.97339e-09	3.58577e-08
DCDC2C	728597	2.10522	7.47327e-05	0.00034598
FGF5	2250	2.10261	0.00188621	0.0060812
ACAN	176	2.09987	1.09919e-05	6.23779e-05
MIR542	664617	2.09954	0.0116681	0.0293847
FFAR3	2865	2.0987	1.69325e-05	9.21094e-05
LINC01704	646268	2.09857	7.70627e-05	0.000355913
ORF44	HHV8GK18_gp47	2.09372	0.000572692	0.00212718
MIR181B1	406955	2.09306	0.00055011	0.00205181
ZNF716	441234	2.092	0.0205144	0.0474645
TM4SF18	116441	2.08131	8.43857e-12	1.66928e-10
SPP1	6696	2.07511	0.000255781	0.00104508
SBK2	646643	2.0729	0.000998936	0.00347185
ADD2	119	2.07285	3.4407e-10	4.92879e-09
SLC26A4	5172	2.07158	4.15234e-11	7.15829e-10
LOXHD1	125336	2.07157	1.12773e-09	1.4611e-08
STC1	6781	2.06983	6.928e-07	5.16419e-06
CALCRL	10203	2.06396	1.96427e-09	2.4391e-08
CREG2	200407	2.05998	8.63466e-07	6.28871e-06
MIR551A	693135	2.05948	0.000581381	0.00215499
SPTA1	6708	2.0582	1.97275e-07	1.67114e-06
ORF62	HHV8GK18_gp69	2.05505	0.0047258	0.0134594
LRP2	4036	2.05421	0.000379603	0.00147782
C6orf118	168090	2.04511	0.00632533	0.0173473
KCNQ3	3786	2.04389	1.00798e-10	1.61313e-09
LINC02538	401286	2.04291	3.85727e-09	4.56808e-08
CNTNAP5	129684	2.04233	0.000807273	0.00287912
RTP3	83597	2.04202	0.00015554	0.000669542
PGM2L1	283209	2.03962	6.59132e-16	2.52028e-14
vIRF-3	HHV8GK18_gp64	2.03837	0.0031714	0.00954503
MORC1	27136	2.03536	0.00230266	0.00724235
BCL2L2-PABPN1	100529063	2.03453	0.0152849	0.0369392
SCN9A	6335	2.03012	3.18035e-10	4.57937e-09
ORF48	HHV8GK18_gp48	2.02921	0.000185701	0.000783769
GRM5	2915	2.029	0.00027185	0.0011023
ADAMTS5	11096	2.02413	7.38723e-13	1.80598e-11
MMP1	4312	2.02102	0.000410556	0.00158309
ORF50	HHV8GK18_gp52	2.0192	1.8747e-05	0.000100951
OR4D6	219983	2.01482	0.000538573	0.00201297
ADARB2	105	2.01045	7.27134e-07	5.38969e-06
PLD5	200150	2.00198	0.000258799	0.00105542
MIR4451	100616349	1.99837	0.0200113	0.0464763
SMIM24	284422	1.99733	0.000626742	0.00230203
ZNF730	100129543	1.99488	4.15772e-11	7.16264e-10
MIR1915	100302129	1.99104	0.000330432	0.00130958
GALNT9	50614	1.98393	0.000192392	0.000809558
ABCA4	24	1.97831	1.42509e-08	1.5108e-07
LINC02355	101927849	1.96584	0.0125731	0.03131
PRND	23627	1.96308	0.000932802	0.003271
H1-8	132243	1.9613	0.000558023	0.00207885
UNC5A	90249	1.95965	1.59081e-07	1.375e-06
LRRC31	79782	1.95707	3.0574e-05	0.000156093
H1-5	3009	1.95626	0.002077	0.00661889
LINC01227	101928276	1.95485	0.00413013	0.0120111
CNTNAP4	85445	1.95453	0.000825685	0.0029356
MIP	4284	1.95089	8.99064e-06	5.21695e-05
PAEP	5047	1.95036	1.8434e-07	1.57165e-06
FILIP1	27145	1.95016	5.65947e-10	7.70664e-09
ZNF560	147741	1.9489	0.00299084	0.00908114
KCNH6	81033	1.9469	0.000839935	0.00298077
ORF4	HHV8GK18_gp02	1.94612	0.0121932	0.0305007
DUXAP8	503637	1.94602	2.26504e-07	1.89191e-06
PLAC1	10761	1.93972	0.000392645	0.00152127
DENND2A	27147	1.93866	3.06577e-13	7.98532e-12
ORF68	HHV8GK18_gp77	1.93337	0.000881745	0.0031111
SCML2	10389	1.92935	8.91821e-19	5.21434e-17
AGBL1	123624	1.92841	6.91476e-06	4.12861e-05
LINC01224	104472717	1.92694	4.33006e-06	2.71189e-05
PURPL	643401	1.92657	0.0010475	0.00362357
ORF11	HHV8GK18_gp08	1.92463	0.00315046	0.00949111
CACNG1	786	1.92345	0.00242879	0.00758295
AGBL1-AS1	727915	1.92265	0.0158312	0.0381198
LCN1	3933	1.92153	0.000492272	0.00186211
LINC01913	388942	1.92008	0.00805386	0.0213931
HOATZ	399949	1.9115	6.47491e-07	4.86404e-06
KCNA4	3739	1.91108	6.16304e-05	0.000291235
SLC22A16	85413	1.91051	8.59139e-08	7.86694e-07
COL18A1-AS2	100874236	1.90778	0.0147076	0.0357352
ADRA1B	147	1.90726	3.06356e-08	3.0554e-07
TGM7	116179	1.90598	0.0129791	0.0321472
DISP3	57540	1.90227	2.5021e-06	1.64164e-05
PROX1	5629	1.90092	2.77487e-08	2.7919e-07
HNF4A	3172	1.89838	0.00959446	0.0248742
CTLA4	1493	1.89313	7.59732e-07	5.60306e-06
PCDHGA4	56111	1.89263	3.39325e-10	4.86359e-09
ORF49	HHV8GK18_gp53	1.89077	0.000535065	0.00200224
MYLK2	85366	1.88904	2.69343e-07	2.20422e-06
PCAT5	102578074	1.88844	0.00213087	0.00676478
GPRIN3	285513	1.88837	1.14746e-09	1.4859e-08
ORF47	HHV8GK18_gp49	1.88694	0.000684333	0.00248662
CCDC60	160777	1.88154	7.76522e-06	4.57648e-05
HOXD11	3237	1.87722	0.000507559	0.00191364
CAMK1G	57172	1.87415	2.37567e-07	1.97576e-06
CTRB1	1504	1.87257	0.00582193	0.0161575
ZNF695	57116	1.87153	8.53327e-10	1.12712e-08
MYPN	84665	1.86983	4.58637e-06	2.85459e-05
RIT2	6014	1.86915	0.0209166	0.0482705
TDO2	6999	1.86771	1.54562e-06	1.06537e-05
ZNF385D-AS1	100874216	1.86692	0.00246239	0.00767353
LINC02915	400360	1.8669	1.33578e-05	7.42585e-05
HOXB9	3219	1.86376	4.3236e-07	3.38585e-06
MYADML	151325	1.8617	0.00544832	0.015237
TEDC2-AS1	729652	1.86069	0.000462679	0.00176028
SNCB	6620	1.85759	1.97035e-06	1.32642e-05
P4HA3-AS1	101928580	1.85578	0.000323516	0.00128663
CMKLR2	2825	1.85517	5.70818e-11	9.55797e-10
GAS2L3	283431	1.85139	8.09883e-15	2.70857e-13
ZP2	7783	1.85021	0.000233885	0.000964416
EPHX4	253152	1.84678	3.38347e-14	1.02373e-12
CFAP65	255101	1.84564	0.0072236	0.019443
DRC7	84229	1.84327	1.04275e-05	5.95519e-05
MYZAP	100820829	1.84211	4.30882e-17	1.96506e-15
LINC02181	440390	1.83734	0.00175467	0.00571643
PCDH12	51294	1.83681	1.43855e-11	2.72531e-10
GPR182	11318	1.83557	1.83738e-09	2.29517e-08
NEK10	152110	1.83351	9.56524e-10	1.25222e-08
CORO6	84940	1.8297	1.01171e-10	1.61532e-09
PI3	5266	1.82873	0.00303656	0.00920437
PRKCQ-AS1	439949	1.82733	2.34075e-09	2.86965e-08
ROPN1L	83853	1.82531	2.49924e-12	5.51349e-11
SMAD1-AS2	101927659	1.82468	4.35338e-05	0.00021344
OMP	4975	1.82436	0.000866095	0.00306148
CNTN6	27255	1.82314	3.98588e-05	0.000197639
CLDN5	7122	1.82256	2.18688e-09	2.69154e-08
ZMAT4	79698	1.81833	0.000665909	0.00242706
OTOGL	283310	1.81789	6.55937e-11	1.08672e-09
NFIA-AS2	100996570	1.81666	3.96538e-07	3.13765e-06
LINC01968	100507391	1.81415	0.00541631	0.015161
SCHIP1	29970	1.81366	0.000619627	0.00228057
AFAP1L1	134265	1.81306	3.10374e-15	1.09341e-13
PIEZO2	63895	1.81302	3.32789e-09	3.98631e-08
SEC14L4	284904	1.81211	0.00134545	0.00452264
LINC02864	400655	1.81143	0.00851263	0.0224453
LINC01529	644050	1.80981	0.000957697	0.00334381
PDE4B-AS1	101927139	1.80977	0.00488107	0.0138435
LINC01624	401289	1.8095	0.000395676	0.00153089
CPA6	57094	1.80854	0.00130471	0.00439925
TMEM26	219623	1.80716	2.11806e-07	1.78279e-06
NOS2	4843	1.80505	5.53059e-06	3.37363e-05
KCNK17	89822	1.80419	0.000258839	0.00105542
TPO	7173	1.80188	3.19433e-08	3.16318e-07
PTX4	390667	1.8007	8.05529e-05	0.000370804
RNU1-1	26871	1.79628	0.00845356	0.0223193
OPCML	4978	1.79159	7.64905e-07	5.638e-06
LMNTD1	160492	1.7904	0.00181049	0.00586497
LYVE1	10894	1.79011	4.88327e-08	4.69119e-07
LRRIQ4	344657	1.78944	2.16617e-06	1.44199e-05
GPR137C	283554	1.78925	1.0261e-11	1.99982e-10
ERFE	151176	1.78903	2.57924e-06	1.68653e-05
MYL2	4633	1.78306	0.00173469	0.00565817
GNG11	2791	1.78271	1.41072e-12	3.25185e-11
PDPN	10630	1.78176	1.17712e-11	2.26598e-10
CHRFAM7A	89832	1.78152	2.38034e-11	4.32652e-10
ZBTB8B	728116	1.78094	0.0146082	0.0355229
KCNF1	3754	1.78084	3.11104e-05	0.000158606
RASGRP3	25780	1.78032	1.81663e-10	2.75912e-09
GABRD	2563	1.77801	3.81194e-08	3.73496e-07
ANGPTL3	27329	1.77753	0.000396668	0.00153425
FSD1	79187	1.77713	1.11897e-05	6.32997e-05
LRRN2	10446	1.77693	4.90507e-08	4.71033e-07
KRTAP5-AS1	338651	1.77652	0.00178742	0.00579697
MRC1	4360	1.77595	8.24111e-09	9.18593e-08
CFAP161	161502	1.77537	3.53274e-10	5.04867e-09
ADAMTS7	11173	1.77164	1.59315e-10	2.45763e-09
GOLGA8EP	390535	1.7694	6.70282e-05	0.00031367
H3C3	8352	1.76814	0.000394431	0.00152631
CDC20B	166979	1.76791	0.00132959	0.00447471
DPRX	503834	1.76779	0.00121789	0.00413934
KBTBD11	9920	1.76764	2.46894e-12	5.45145e-11
CCDC26	728724	1.76437	0.00325008	0.00975724
TMEM233	387890	1.76421	3.93883e-08	3.84427e-07
LINC01845	285627	1.76261	0.000806064	0.00287562
OPN5	221391	1.76085	0.000159315	0.00068356
ASCL3	56676	1.76061	0.00194525	0.00624636
NKX6-1	4825	1.75861	0.00221275	0.00699393
MOBP	4336	1.74555	1.72216e-06	1.17257e-05
SH2D4B	387694	1.74538	1.46825e-10	2.28179e-09
CLEC4M	10332	1.74358	0.00584571	0.0162127
HMGA2-AS1	100129940	1.73852	3.00204e-07	2.43453e-06
KASH5	147872	1.73807	0.00461079	0.0131828
H2AC4	8335	1.73674	0.0112893	0.0285829
DYSF	8291	1.73643	1.96024e-12	4.40579e-11
TBXA2R	6915	1.73636	1.13561e-10	1.796e-09
RGS8	85397	1.73169	6.69685e-05	0.000313507
MIR4514	100616181	1.731	0.00766482	0.0204921
KNL1	57082	1.72712	6.63399e-10	8.93185e-09
ST6GAL2	84620	1.7223	2.54625e-05	0.000132781
LINC01558	26238	1.72172	2.07551e-08	2.13799e-07
K8	HHV8GK18_gp54	1.72107	0.0162297	0.038889
MIR874	100126343	1.71944	0.00300013	0.00910274
ZNF99	7652	1.71735	5.32678e-07	4.07974e-06
UNC45B	146862	1.71522	4.79513e-07	3.71682e-06
MUC13	56667	1.71115	0.00572235	0.0159128
BLOC1S5	63915	1.70621	0.00401231	0.0117297
GOLGA8F	100132565	1.70312	0.000238327	0.000979833
TMEM171	134285	1.7028	5.34491e-10	7.30606e-09
CCDC175	729665	1.70274	0.00324388	0.00973981
NRXN3	9369	1.69589	1.27094e-08	1.36177e-07
LINC01989	101927239	1.69273	0.0126897	0.0315456
CCDC83	220047	1.69146	0.0053607	0.0150225
MIR3681HG	100506457	1.68884	0.000199731	0.00083623
STEAP1B	401312	1.68688	0.00470029	0.013399
PPP3R2	5535	1.68435	0.00621394	0.017081
ZCCHC12	170261	1.68422	0.000251462	0.00102928
MUC19	283463	1.68219	0.00169167	0.00553263
ITGA9	3680	1.67926	2.66224e-11	4.78683e-10
DNAJC12	56521	1.67792	9.15839e-08	8.32922e-07
SEMA3D	223117	1.67678	3.25516e-06	2.09303e-05
SLC2A7	155184	1.67543	1.01021e-06	7.25428e-06
STOML3	161003	1.67398	0.0137815	0.0337902
UNC80	285175	1.66984	5.14133e-08	4.92213e-07
ITGA1	3672	1.66936	6.94028e-09	7.84158e-08
SCN11A	11280	1.66681	0.000335904	0.00132769
OR1K1	392392	1.66429	0.000902901	0.00317815
MCAM	4162	1.66339	5.56432e-13	1.39014e-11
HOXD10	3236	1.66323	2.12122e-09	2.61715e-08
APOA2	336	1.6612	0.00381571	0.0112085
LAYN	143903	1.65905	1.24836e-11	2.39393e-10
LINC01732	101928973	1.65223	0.00610206	0.0168154
MROH2B	133558	1.65002	6.37038e-05	0.000299846
MIRLET7C	406885	1.64841	0.00538896	0.0150878
CENPE	1062	1.64739	1.31447e-12	3.05853e-11
ARHGAP18	93663	1.64727	3.23354e-19	2.00264e-17
SV2A	9900	1.64247	1.69098e-13	4.6053e-12
TMEFF1	8577	1.6424	0.000190226	0.000801114
ORF56	HHV8GK18_gp60	1.64071	0.011668	0.0293847
NPNT	255743	1.63984	1.8106e-13	4.89729e-12
DOCK9-AS1	100874096	1.63961	0.000194763	0.000818571
ZNF729	100287226	1.63823	0.00321627	0.00966616
PVALEF	388428	1.63741	0.0123553	0.030858
ADGRF5	221395	1.63722	1.59459e-10	2.45834e-09
TMED7-TICAM2	100302736	1.63239	0.00716722	0.0193058
LINC02226	729506	1.63108	0.00580773	0.0161235
STK32B	55351	1.62844	2.23812e-12	4.97244e-11
FN1	2335	1.62761	1.19069e-09	1.53949e-08
ORF67A	HHV8GK18_gp73	1.62451	0.0147376	0.0357958
ADAMTS4	9507	1.62318	9.30065e-06	5.37283e-05
TRPM5	29850	1.62212	0.000234178	0.000965305
ORF61	HHV8GK18_gp66	1.6207	0.0143856	0.0350392
C2orf50	130813	1.62031	1.51596e-06	1.04694e-05
ZSCAN10	84891	1.61946	0.000254123	0.00103915
ORF64	HHV8GK18_gp72	1.61899	0.0149168	0.0361821
CATSPER4	378807	1.61767	0.013345	0.0329072
PCSK6	5046	1.61762	9.43197e-17	4.08605e-15
NFE4	58160	1.61666	0.0064609	0.0176727
CHSY3	337876	1.61569	2.98516e-10	4.32563e-09
CCDC141	285025	1.61417	6.64048e-07	4.97055e-06
PXDN	7837	1.61271	2.22562e-09	2.73385e-08
DYRK3	8444	1.61182	1.35211e-14	4.33695e-13
CYP46A1	10858	1.60977	1.30213e-07	1.14561e-06
MYH7	4625	1.60507	0.00942141	0.024499
INHBB	3625	1.60503	1.90522e-11	3.51646e-10
SLC4A7	9497	1.60449	1.07559e-12	2.55484e-11
CMBL	134147	1.6036	2.60026e-15	9.25139e-14
TNFRSF10C	8794	1.60313	1.65459e-15	6.09428e-14
LINC00536	100859921	1.60051	0.0122615	0.0306514
ZAN	7455	1.59929	0.00193675	0.00622416
DAB1	1600	1.59909	0.000628203	0.00230677
CDH17	1015	1.59838	2.55494e-05	0.000133123
RGS17	26575	1.59779	2.50379e-10	3.68343e-09
PCDHB8	56128	1.59733	2.27997e-10	3.38788e-09
CLDN24	100132463	1.59434	3.33284e-06	2.13855e-05
FRG2C	100288801	1.59394	0.000415715	0.00160076
FER1L6	654463	1.59368	0.000480378	0.00182014
PRDM8	56978	1.5913	1.44733e-08	1.5292e-07
CENPK	64105	1.58625	3.61109e-13	9.30904e-12
GGNBP1	449520	1.58541	0.000453395	0.00172887
BCL6B	255877	1.58303	1.50524e-11	2.84093e-10
THSD7A	221981	1.58244	2.72298e-08	2.74409e-07
GRIK3	2899	1.58211	2.23948e-05	0.000118633
UCP1	7350	1.58203	0.000361861	0.001416
GRAPL	400581	1.57977	1.89616e-07	1.6128e-06
ANGPT2	285	1.57821	8.23723e-10	1.08974e-08
SAMD14	201191	1.57791	4.51927e-12	9.47007e-11
COL4A1	1282	1.57656	8.1167e-08	7.47947e-07
CCDC179	100500938	1.57476	0.00891512	0.023347
MPPED2	744	1.57456	7.93267e-12	1.57917e-10
TNFRSF4	7293	1.57354	1.24931e-08	1.33974e-07
NR5A2	2494	1.5733	5.66977e-11	9.49998e-10
LMOD3	56203	1.57164	7.9042e-05	0.000364249
PHEX	5251	1.57106	7.69029e-10	1.02332e-08
SIGLEC12	89858	1.56471	0.00051692	0.00194362
RPL3L	6123	1.56318	0.0121567	0.0304319
H4C2	8366	1.56091	0.0199893	0.0464338
NETO2	81831	1.5607	6.6967e-09	7.59374e-08
HSPA12B	116835	1.56024	1.42477e-11	2.70739e-10
PCAT19	100505495	1.55843	3.59926e-11	6.2948e-10
STK33	65975	1.55824	2.72843e-07	2.23214e-06
PCDHAC2	56134	1.55789	3.98619e-05	0.000197639
KDR	3791	1.55511	6.12556e-12	1.25324e-10
RASL10A	10633	1.55364	1.33419e-10	2.08378e-09
ZNF728	388523	1.55228	0.000170881	0.000727709
CREM	1390	1.55174	6.10438e-16	2.3629e-14
ISLR2	57611	1.54901	2.17794e-05	0.000115642
FAM126A	84668	1.54782	3.68047e-12	7.89712e-11
ORF67	HHV8GK18_gp74	1.54741	0.00442268	0.012732
SMOC1	64093	1.54408	3.4334e-08	3.38922e-07
FOXD4L4	349334	1.54336	0.000314525	0.00125505
FLT4	2324	1.54322	4.49467e-07	3.50444e-06
NID1	4811	1.54204	4.43528e-10	6.17713e-09
SLC6A17	388662	1.5417	9.26937e-14	2.62124e-12
CYTL1	54360	1.5405	1.03114e-07	9.26035e-07
MDS2	259283	1.53559	0.000291729	0.00117436
GOLGA8G	283768	1.53451	0.00101456	0.00352175
AATK	9625	1.53334	1.17499e-12	2.76475e-11
MIR491	574444	1.53328	0.00778302	0.0207572
WSCD1	23302	1.53237	1.38257e-09	1.76125e-08
LINC00336	401253	1.53181	0.0109898	0.0279402
CFAP74	85452	1.53092	1.62298e-07	1.39907e-06
PGF	5228	1.53058	4.95201e-13	1.24835e-11
HAR1B	768097	1.52898	0.00204737	0.00653527
GRAP	10750	1.52775	4.42645e-09	5.17616e-08
DLL4	54567	1.52244	2.71193e-10	3.97797e-09
MEF2C	4208	1.52227	4.61807e-13	1.17005e-11
ODF3L2	284451	1.51991	1.63742e-05	8.93052e-05
C16orf78	123970	1.51921	0.00176087	0.00573142
ITGA9-AS1	101928153	1.5185	1.52586e-16	6.48697e-15
GRPEL2	134266	1.51352	7.31506e-24	9.22028e-22
MYCT1	80177	1.51242	9.56913e-11	1.54355e-09
MIR4326	100422945	1.51218	0.000160975	0.000689976
WWC2-AS1	101928734	1.51134	0.0088526	0.0232027
ARHGAP29	9411	1.51102	5.48325e-16	2.13235e-14
LINC02078	100652929	1.51092	0.0114201	0.0288527
NRIP1	8204	1.5084	3.21772e-15	1.12881e-13
MIR126	406913	1.50817	1.48985e-05	8.19873e-05
KBTBD11-AS1	101928058	1.50807	0.000147188	0.000637969
ORF46	HHV8GK18_gp50	1.50736	0.00334892	0.0100049
NOX4	50507	1.50649	5.35217e-08	5.10645e-07
MIR146A	406938	1.50629	6.70483e-05	0.000313705
TRPM8	79054	1.50455	0.0020936	0.00666587
LMO2	4005	1.50446	4.25328e-17	1.95037e-15
NALF1	728215	1.50214	1.018e-06	7.29976e-06
SPDYC	387778	1.50211	0.0019276	0.00619872
MMP10	4319	1.50021	0.00469916	0.0133973
MAGED4B	81557	1.49984	5.25021e-10	7.19346e-09
FSCN1	6624	1.49679	1.54122e-16	6.51912e-15
CETP	1071	1.49598	1.8173e-09	2.27234e-08
KANK3	256949	1.49513	4.4859e-10	6.23033e-09
GIPC3	126326	1.4944	2.58128e-10	3.79298e-09
IGFBP5	3488	1.49347	8.50865e-08	7.80053e-07
MIR130B	406920	1.49311	0.00943318	0.0245247
LRFN2	57497	1.4913	0.00338799	0.0101095
GRASLND	386597	1.49129	7.8431e-09	8.78252e-08
PCDHGA3	56112	1.4907	7.47399e-12	1.49799e-10
SNORA2B	677794	1.48941	0.000415359	0.00159988
MIR4420	100616164	1.48714	0.00178246	0.00578389
C20orf204	284739	1.48651	4.8957e-14	1.45669e-12
IL12A	3592	1.48296	2.59235e-08	2.62194e-07
CDH5	1003	1.48238	5.57992e-11	9.37322e-10
H2AC14	8331	1.48145	0.00013718	0.000599311
SGO2	151246	1.47992	8.45563e-14	2.40468e-12
POLR3G	10622	1.47815	5.22364e-11	8.81886e-10
NR2F1-AS1	441094	1.47763	2.71643e-10	3.98225e-09
LINC01775	101928602	1.4767	0.000330786	0.00131046
TMEM217	221468	1.47574	2.47637e-13	6.51099e-12
SNORA11D	100124541	1.47561	0.000725179	0.00261797
KIF14	9928	1.47537	3.81956e-09	4.52983e-08
LYPD1	116372	1.47325	5.41549e-07	4.14047e-06
GALNT4	8693	1.47017	3.84949e-05	0.000191657
LINC00839	84856	1.46664	2.72824e-11	4.89502e-10
ERG	2078	1.46577	1.97648e-13	5.30793e-12
PCDHA1	56147	1.46457	0.00655293	0.0178835
LINC02345	101928227	1.46278	0.00121549	0.00413174
LAMA4	3910	1.46262	4.98815e-13	1.2562e-11
LINC02753	101928443	1.46038	0.00968693	0.0250776
TRPC4	7223	1.45966	3.41986e-06	2.18716e-05
RBPJL	11317	1.45947	0.00751316	0.0201317
PNP	4860	1.45825	3.68426e-15	1.27995e-13
ANKRD18DP	348840	1.45819	0.000238154	0.000979279
STARD6	147323	1.45713	0.00108035	0.00372334
CCIN	881	1.45708	2.76341e-07	2.25854e-06
ZNF257	113835	1.45654	2.34005e-12	5.18512e-11
MIR933	100126350	1.45588	0.0108356	0.0275846
KCNIP1-AS1	105377716	1.45579	0.0129746	0.0321392
METTL4	64863	1.45499	2.2432e-18	1.25036e-16
WASIR2	100132169	1.45474	0.00729167	0.0196052
CD200	4345	1.45424	4.46239e-10	6.21144e-09
MIR3145	100423001	1.45388	0.000331097	0.00131137
AKAP12	9590	1.45372	6.19389e-08	5.84505e-07
ORF66	HHV8GK18_gp75	1.4533	0.012269	0.0306664
KLHL5	51088	1.4525	3.93588e-16	1.56953e-14
GBX2	2637	1.45236	0.00060033	0.00221834
LGI2	55203	1.45034	3.33503e-06	2.1389e-05
RXFP1	59350	1.4491	0.000102701	0.000462484
MIR4435-1	100616499	1.4468	0.012194	0.0305007
PPP1R13B-DT	145216	1.44653	0.000421135	0.00161791
CARD8-AS1	100505812	1.44586	5.27787e-15	1.7914e-13
MIR302C	442895	1.44512	0.0142616	0.0347811
C16orf89	146556	1.44492	6.89392e-07	5.14247e-06
MIR644A	693229	1.44023	0.0085931	0.0226266
PPM1F	9647	1.43996	1.20674e-22	1.27716e-20
NRP2	8828	1.43993	1.81001e-10	2.75154e-09
FIGNL2	401720	1.4377	4.57249e-10	6.34006e-09
KRT24	192666	1.4359	0.00358736	0.0106274
PANTR1	100506421	1.43581	0.00401841	0.0117434
H4C3	8364	1.4345	0.0078188	0.0208438
RET	5979	1.43398	1.0811e-08	1.17696e-07
LRRN4CL	221091	1.43362	5.62306e-12	1.15515e-10
ADD3	120	1.43349	6.09004e-16	2.361e-14
NR2F1	7025	1.43311	1.44215e-08	1.52502e-07
RAPGEF5	9771	1.43206	2.12369e-13	5.66085e-12
APOLD1	81575	1.43179	8.90484e-11	1.4457e-09
MMP16	4325	1.4312	1.28147e-06	8.9961e-06
MIR103A2	406896	1.43095	0.0061727	0.0169844
MIR4477B	100616194	1.42688	3.06313e-05	0.000156354
OR51B5	282763	1.42612	0.00516774	0.0145578
COL4A2	1284	1.42557	1.25034e-07	1.10314e-06
EPHB1	2047	1.42453	2.31423e-13	6.12964e-12
GARIN1B	84691	1.42295	0.00147167	0.00488909
TNFSF11	8600	1.42277	1.65862e-05	9.03436e-05
MAGED4	728239	1.42174	2.87682e-09	3.47923e-08
TIE1	7075	1.41945	1.21352e-09	1.56417e-08
HECW2	57520	1.41891	2.69247e-13	7.04225e-12
MMP17	4326	1.41658	2.10667e-08	2.16742e-07
STC2	8614	1.41427	7.17356e-08	6.6915e-07
LY86-AS1	285780	1.41422	0.0106352	0.0271459
APBA2	321	1.4142	1.01008e-10	1.61478e-09
TRIL	9865	1.41345	1.46427e-10	2.27701e-09
SCARNA5	677775	1.41334	0.0100069	0.0257889
MIR887	100126347	1.4132	0.0177912	0.0420797
EYA1	2138	1.41305	0.000659734	0.00240735
RASGRF2	5924	1.41147	7.32471e-13	1.79245e-11
N4BP3	23138	1.40983	9.29418e-13	2.22874e-11
PCDHGA1	56114	1.4097	2.41657e-07	2.00645e-06
PCDH9	5101	1.40923	2.41312e-06	1.59034e-05
KNG1	3827	1.40865	0.00593195	0.0164265
PIWIL3	440822	1.40753	0.00490327	0.013897
PRR29	92340	1.405	4.51625e-11	7.73251e-10
TP53I11	9537	1.40239	1.01892e-19	6.70802e-18
CLRN3	119467	1.40153	0.0113771	0.0287644
TOR4A	54863	1.40036	5.08283e-11	8.59694e-10
FBN2	2201	1.39872	2.53122e-06	1.65775e-05
KIF17	57576	1.39747	2.93142e-12	6.38825e-11
IPCEF1	26034	1.39689	1.69865e-13	4.62118e-12
DLGAP3	58512	1.39567	1.37224e-08	1.46095e-07
SULT1C4	27233	1.39475	2.61164e-07	2.14498e-06
PRR29-AS1	400612	1.39438	9.37526e-08	8.50795e-07
RPS6KA2-IT1	100874353	1.39403	4.59861e-06	2.8615e-05
ADGRE1	2015	1.39239	0.00228914	0.00720432
NOVA2	4858	1.39141	4.3878e-10	6.1178e-09
ANO4	121601	1.38811	0.000119478	0.000529951
DLGAP5	9787	1.38808	2.50388e-09	3.05684e-08
EXOC3L1	283849	1.38552	2.5755e-13	6.75746e-12
LINC00636	285205	1.38358	3.90743e-05	0.000194156
FEZ1	9638	1.38102	4.93626e-15	1.68203e-13
PPEF1	5475	1.38061	0.000274905	0.00111361
MIR8083	102466879	1.37898	0.00328906	0.00985185
LRRC34	151827	1.37563	1.0293e-19	6.75863e-18
TAFA5	25817	1.37508	1.26719e-07	1.11722e-06
ITGA5	3678	1.37436	1.4319e-14	4.56369e-13
CHST7	56548	1.37418	7.4844e-11	1.2246e-09
LINC01146	283587	1.373	0.0110261	0.0280238
MYO1B	4430	1.37226	4.64824e-13	1.17414e-11
LINC00888	100505687	1.37129	1.24923e-13	3.48935e-12
ZNF208	7757	1.36977	1.15085e-06	8.15678e-06
EFR3B	22979	1.3692	4.6182e-16	1.81281e-14
LINC01117	102724224	1.36901	1.20909e-08	1.3005e-07
MUC6	4588	1.36793	0.00913272	0.0238397
C2CD4B	388125	1.36787	3.10854e-06	2.00751e-05
RCSD1	92241	1.36708	1.10104e-11	2.12604e-10
PCLO	27445	1.36624	3.90572e-11	6.77505e-10
NOS3	4846	1.36621	3.26582e-13	8.48875e-12
GOLGA8CP	729786	1.36595	0.00112042	0.00384349
GOLGA6L7	728310	1.36309	0.00400295	0.0117051
PCDHGB3	56102	1.36181	3.53465e-06	2.25425e-05
CYP8B1	1582	1.36155	2.85081e-05	0.000146711
HOXD9	3235	1.36104	3.29854e-10	4.73597e-09
LRRC70	100130733	1.36062	1.22374e-09	1.57572e-08
ZEB1	6935	1.3596	2.49343e-11	4.50921e-10
PRR11	55771	1.35901	4.48534e-15	1.53487e-13
BVES	11149	1.35845	1.42992e-11	2.71307e-10
MIR10B	406903	1.35705	0.0150713	0.0365003
CDR2L	30850	1.35606	1.57965e-16	6.65922e-15
SV2B	9899	1.35469	8.59251e-07	6.25983e-06
POTEM	641455	1.35226	0.00430348	0.0124403
SNORD98	692211	1.35223	0.000874651	0.00308868
GNG2	54331	1.35188	6.37393e-12	1.29876e-10
ADAM19	8728	1.34907	2.14792e-07	1.80361e-06
VLDLR	7436	1.34745	1.93177e-14	6.05683e-13
TRIB3	57761	1.34742	8.96634e-13	2.15631e-11
ROBO4	54538	1.34729	2.78104e-10	4.06272e-09
TSPAN18	90139	1.34641	2.42291e-10	3.57704e-09
SGCE	8910	1.34624	3.56951e-10	5.08716e-09
CENPF	1063	1.34516	7.00607e-12	1.41606e-10
TMOD2	29767	1.34438	7.42372e-15	2.49276e-13
KCNN1	3780	1.34338	0.000578038	0.00214449
CCNJL	79616	1.34334	2.69594e-12	5.92139e-11
TLNRD1	59274	1.34214	1.80023e-15	6.59201e-14
PCDHGB1	56104	1.34087	2.13958e-07	1.79729e-06
SYT11	23208	1.34068	9.24431e-14	2.6171e-12
HYAL2	8692	1.34024	5.96088e-18	3.14111e-16
FAM43A	131583	1.33919	2.39752e-15	8.56652e-14
DIPK2B	79742	1.33844	6.42728e-12	1.30785e-10
TLR4	7099	1.33814	2.02745e-08	2.09105e-07
TSPAN15	23555	1.33789	2.6939e-11	4.83688e-10
CDYL2	124359	1.33739	1.22123e-16	5.20954e-15
RPS6KA2	6196	1.33733	1.13941e-17	5.72743e-16
ECSCR	641700	1.33714	5.5965e-11	9.38977e-10
FJX1	24147	1.33606	1.2762e-14	4.12511e-13
EPOR	2057	1.3353	6.31731e-13	1.55962e-11
ST3GAL6	10402	1.33484	1.00706e-20	7.86917e-19
ACKR3	57007	1.33458	1.17925e-11	2.26835e-10
INSR	3643	1.33451	4.40323e-16	1.74205e-14
ALPK3	57538	1.33297	5.53409e-07	4.22176e-06
CYRIA	81553	1.33016	1.55977e-13	4.27582e-12
PRRG1	5638	1.32968	4.68854e-14	1.4017e-12
SLC19A1	6573	1.32879	5.21538e-10	7.16023e-09
P4HA3	283208	1.32873	0.000103797	0.000467088
ZNF93	81931	1.32871	1.69944e-17	8.39118e-16
DEPDC1	55635	1.32748	7.16139e-08	6.68512e-07
HCCAT5	283902	1.32717	0.000326002	0.00129487
MIR5191	100847050	1.32704	0.0100839	0.0259446
NID2	22795	1.32675	4.7127e-07	3.65971e-06
PRMT8	56341	1.32609	0.00278758	0.0085301
H2BC10	8346	1.32485	0.01785	0.0421951
SPRY4	81848	1.32407	3.11749e-10	4.4992e-09
MIR548L	100302275	1.32381	0.00917829	0.0239487
DDO	8528	1.32331	4.16459e-12	8.8078e-11
FSIP1	161835	1.32255	1.2575e-08	1.34794e-07
HOXD1	3231	1.32191	5.04511e-09	5.83163e-08
PEG10	23089	1.32154	7.37027e-07	5.45645e-06
H1-4	3008	1.32037	0.020204	0.0468543
CA7	766	1.32014	0.0217646	0.0499836
PRECSIT	283487	1.31966	4.96982e-14	1.47699e-12
MAP4K4	9448	1.31916	3.28106e-19	2.02706e-17
GYPC	2995	1.31644	6.88318e-10	9.23267e-09
SLC39A14	23516	1.31434	4.3784e-13	1.1127e-11
GLT8D2	83468	1.31258	9.08832e-10	1.19602e-08
SCGB3A1	92304	1.31142	9.91564e-05	0.000448214
S1PR3	1903	1.31067	3.98782e-12	8.48026e-11
SLC27A3	11000	1.3103	1.33115e-13	3.69759e-12
KLF17	128209	1.31019	0.0166105	0.0396612
MARCHF4	57574	1.30989	0.00234172	0.0073495
MMP25	64386	1.30826	5.10603e-10	7.01778e-09
UBE2E1-AS1	100874092	1.30798	0.000199577	0.000835723
VASH1	22846	1.30771	4.13027e-10	5.78768e-09
TRIML2	205860	1.30659	0.0155132	0.0374224
H2AC17	8336	1.30635	0.000374338	0.00145913
PKD1L3	342372	1.30617	1.3154e-09	1.6851e-08
ZPLD1	131368	1.30575	0.015353	0.0370643
TNFAIP8L1	126282	1.30487	6.6745e-14	1.93769e-12
SLC2A3	6515	1.30466	4.53122e-08	4.37141e-07
CD80	941	1.30341	2.22986e-07	1.86563e-06
PCDHGA5	56110	1.30283	4.10471e-07	3.23667e-06
CCDC102B	79839	1.30163	6.68428e-07	5.00035e-06
TENM3	55714	1.30154	7.14485e-06	4.24779e-05
STMN1	3925	1.30117	2.921e-16	1.17416e-14
ITGB1	3688	1.30036	1.38176e-13	3.8297e-12
PTX3	5806	1.29971	0.00257938	0.0079855
CFI	3426	1.29872	1.8845e-09	2.35052e-08
DCHS1	8642	1.29828	3.80411e-10	5.37569e-09
TMEM51-AS2	727684	1.29811	0.00870504	0.0228877
RSPH6A	81492	1.29763	0.00352878	0.0104736
LINC01163	101927381	1.29749	0.0127527	0.0316741
LGALS1	3956	1.29736	7.16963e-08	6.69032e-07
GDPD4	220032	1.29672	0.00118575	0.00404489
GPRC5B	51704	1.29659	1.05358e-10	1.67684e-09
PCTP	58488	1.29652	7.56171e-17	3.32172e-15
RNF182	221687	1.29528	2.08876e-06	1.39713e-05
LYN	4067	1.29509	4.91894e-13	1.24126e-11
LRRC10B	390205	1.29419	0.000111318	0.000497984
LINC00960	401074	1.29334	1.4989e-05	8.24496e-05
FCMR	9214	1.2928	1.93742e-07	1.64288e-06
LINC00629	100506757	1.29268	0.000159102	0.000682882
IGF1	3479	1.29197	3.60693e-05	0.000180909
UNC5B	219699	1.28989	2.08861e-12	4.6609e-11
PCDHA2	56146	1.28937	0.00186674	0.00602387
SPOCD1	90853	1.28908	0.000240608	0.000988426
ZNF676	163223	1.28774	0.000190272	0.000801174
MROCKI	285758	1.28707	1.01525e-06	7.2863e-06
SP6	80320	1.28549	1.72846e-09	2.16774e-08
C18orf54	162681	1.28449	6.30792e-14	1.83765e-12
HECW2-AS1	101927482	1.28432	1.30878e-06	9.175e-06
TYMS	7298	1.28365	8.15218e-11	1.32866e-09
LINC02582	100505817	1.2833	0.0100182	0.02581
H2AC16	8332	1.28247	0.0191609	0.0448417
BMP2	650	1.28195	4.74048e-09	5.50998e-08
C4orf45	152940	1.28174	0.00464495	0.0132653
PRKG1	5592	1.28082	9.99095e-09	1.09243e-07
ERICH4	100170765	1.2784	0.00016634	0.000709938
ACKR2	1238	1.27796	4.08471e-06	2.56913e-05
RGS9	8787	1.2766	2.97349e-09	3.58577e-08
PALD1	27143	1.27633	2.66412e-11	4.78683e-10
LRRC74A	145497	1.27521	0.000285603	0.00115248
ST8SIA4	7903	1.27478	1.37834e-07	1.20631e-06
POPDC3	64208	1.27077	3.93668e-05	0.000195455
HID1-AS1	102723641	1.27047	3.55003e-07	2.83447e-06
FERMT2	10979	1.27023	1.76026e-10	2.68731e-09
ALG14-AS1	101928098	1.27017	0.0102453	0.0262925
BTNL3	10917	1.26997	0.0205575	0.0475511
CHST6	4166	1.26836	3.35835e-06	2.15072e-05
CEMIP2	23670	1.2677	1.77448e-10	2.70573e-09
ETS1	2113	1.26761	1.83084e-10	2.77648e-09
IL24	11009	1.26733	0.000191496	0.00080592
SORCS1	114815	1.26638	5.12824e-06	3.15274e-05
PPFIA2-AS1	102724663	1.26629	0.0136897	0.033602
CAVIN2	8436	1.26609	1.95636e-10	2.95432e-09
PLAUR	5329	1.26566	2.17003e-11	3.97015e-10
UACA	55075	1.26433	5.76033e-13	1.4334e-11
CKAP2L	150468	1.26398	1.70049e-09	2.13425e-08
TBX1	6899	1.26195	4.88106e-07	3.77526e-06
ADGRL4	64123	1.26152	2.58107e-08	2.61157e-07
ATP11A-AS1	100874205	1.26032	0.00908614	0.023733
CYP4Z1	199974	1.25982	0.00528514	0.0148435
SGIP1	84251	1.25981	2.31611e-06	1.53407e-05
ZNF702P	79986	1.25971	1.74452e-11	3.24131e-10
PLCB1	23236	1.25771	5.74285e-11	9.60959e-10
CCNE2	9134	1.25696	6.15347e-10	8.31614e-09
SPAAR	158376	1.25634	3.75237e-07	2.98228e-06
MFAP3	4238	1.25588	2.22751e-12	4.95324e-11
LCT	3938	1.2558	0.00597975	0.0165406
ECI2-DT	100507506	1.25554	2.66034e-10	3.90687e-09
ST7-AS2	93654	1.25527	0.00367574	0.0108494
SOCS3-DT	101928674	1.2552	2.49173e-05	0.000130399
PCDHA8	56140	1.25494	0.0133635	0.0329464
GABRR2	2570	1.25348	1.52149e-06	1.04989e-05
LAPTM5	7805	1.25276	9.2884e-10	1.22043e-08
ADAMTS19	171019	1.25051	0.0055623	0.0155192
CDK1	983	1.24965	2.18045e-09	2.68493e-08
LIMS4	100288695	1.24827	1.02408e-14	3.33597e-13
LINC01237	101927289	1.2456	0.00416246	0.0120883
LIMS3	96626	1.24533	5.1189e-12	1.06026e-10
CAVIN3	112464	1.24402	9.7415e-08	8.81479e-07
FIGNL2-DT	105369971	1.2421	2.77526e-05	0.000143146
FGD5	152273	1.24147	8.36383e-12	1.65711e-10
CLSPN	63967	1.24126	1.60119e-12	3.65115e-11
ELAPOR2	222223	1.2403	6.29547e-11	1.04506e-09
ASPM	259266	1.23902	2.29965e-08	2.35054e-07
ZNF793-AS1	101927720	1.23796	4.18973e-13	1.06583e-11
MIR1469	100302258	1.23715	0.00177016	0.00575289
RBM38	55544	1.23651	2.06832e-16	8.56099e-15
MIR4477A	100616184	1.23636	1.15076e-05	6.4937e-05
H2AC13	8329	1.23581	0.00142559	0.0047557
SCRN1	9805	1.23557	6.83056e-17	3.03778e-15
HOXD8	3234	1.23516	1.24181e-15	4.63516e-14
ST6GALNAC3	256435	1.23515	1.76198e-09	2.20758e-08
LINC02104	101926940	1.23473	0.00086263	0.00305181
ARHGEF15	22899	1.23422	1.20432e-09	1.55422e-08
REEP3	221035	1.23337	1.03491e-16	4.46793e-15
LRRTM2	26045	1.23315	4.35514e-08	4.21125e-07
RNASE8	122665	1.23313	0.0184232	0.0433458
LINC02159	285629	1.2321	3.17911e-05	0.000161768
PTPRM	5797	1.23204	1.38919e-14	4.44453e-13
KIT	3815	1.23203	9.7714e-11	1.57315e-09
PODXL	5420	1.23155	4.60305e-10	6.37891e-09
HOMER3	9454	1.23083	4.57432e-11	7.81592e-10
SMAD1	4086	1.23008	3.33462e-15	1.16656e-13
STARD4	134429	1.22894	1.23854e-08	1.33046e-07
CCDC88A	55704	1.22366	1.27607e-11	2.44146e-10
C1orf167	284498	1.22345	0.00420699	0.0122064
KCNE3	10008	1.22344	1.43931e-07	1.25629e-06
TRIM6	117854	1.22255	4.71185e-17	2.14107e-15
ZNF467	168544	1.22175	1.97384e-12	4.42447e-11
SHE	126669	1.22171	7.92644e-14	2.26704e-12
TOP2A	7153	1.22141	1.79797e-08	1.87442e-07
LIPC	3990	1.2199	2.801e-06	1.82203e-05
LGMN	5641	1.21976	6.0563e-09	6.92389e-08
CPT1C	126129	1.21971	6.97464e-12	1.41199e-10
CD34	947	1.21826	2.31876e-09	2.84408e-08
TSN	7247	1.21788	5.96624e-20	4.12262e-18
PCDHGA12	26025	1.21768	9.16271e-06	5.30417e-05
RTN1	6252	1.21592	9.32126e-10	1.22347e-08
TNXB	7148	1.21588	0.000121849	0.000538847
ARHGAP6	395	1.2152	1.77634e-10	2.70692e-09
ENPEP	2028	1.21346	6.96511e-06	4.1557e-05
CYP26C1	340665	1.21289	0.00178736	0.00579697
SLC2A14	144195	1.21238	6.84584e-06	4.09331e-05
CCM2L	140706	1.21217	9.30963e-11	1.50751e-09
RAB39B	116442	1.21148	7.29807e-06	4.3317e-05
MARCKSL1	65108	1.21109	7.1907e-12	1.45104e-10
EGFL7	51162	1.21085	6.29185e-06	3.79189e-05
RASIP1	54922	1.21024	1.91596e-11	3.52902e-10
SERPINA5	5104	1.20921	0.00606858	0.0167365
FAM174B	400451	1.20917	8.32545e-11	1.35514e-09
RFX4	5992	1.20851	0.0154259	0.0372225
FGF12	2257	1.20841	1.03227e-06	7.39147e-06
MELK	9833	1.20784	8.22228e-09	9.17027e-08
RAMP2	10266	1.20706	3.58413e-10	5.10509e-09
CEACAM21	90273	1.20649	4.44559e-06	2.77316e-05
RPSAP52	204010	1.20624	0.00240921	0.00752838
RFLNB	359845	1.20622	7.07637e-14	2.04725e-12
JCAD	57608	1.20581	3.49329e-10	4.99841e-09
RANBP17	64901	1.20439	2.44219e-07	2.02504e-06
KCNN2	3781	1.20428	2.32409e-07	1.93672e-06
SP7	121340	1.20088	0.0154352	0.0372414
HHIPL1	84439	1.20002	9.75318e-10	1.27284e-08
DPYSL3	1809	1.19975	2.25114e-11	4.10955e-10
MIR6511A3	102465683	1.19894	0.00575171	0.0159891
MAP1S	55201	1.19834	4.20603e-12	8.87299e-11
KLHL33	123103	1.19808	1.71808e-06	1.17073e-05
MAP4K2	5871	1.19799	1.42596e-11	2.70759e-10
ANKRD6	22881	1.19739	2.39068e-16	9.81431e-15
PTPRG	5793	1.19699	3.25634e-12	7.02915e-11
OR51E1	143503	1.19579	0.000338632	0.00133741
PCDHB15	56121	1.19544	2.2748e-10	3.38227e-09
C2CD4C	126567	1.19543	7.27811e-05	0.000337881
MAP3K7CL	56911	1.19517	6.28763e-16	2.4189e-14
LRRC19	64922	1.19421	0.000110658	0.000495384
LOX	4015	1.19419	4.65032e-06	2.8908e-05
TAL1	6886	1.19307	1.86941e-10	2.83155e-09
GPR4	2828	1.19246	1.57744e-06	1.08462e-05
PROB1	389333	1.192	5.8575e-10	7.95042e-09
KIF18A	81930	1.19176	9.39625e-09	1.03462e-07
SH2D3C	10044	1.19173	9.48094e-10	1.24183e-08
CXCR4	7852	1.18963	0.000356585	0.00139885
PTPN4	5775	1.18953	1.04326e-14	3.38965e-13
ZGRF1	55345	1.18952	3.96243e-15	1.37278e-13
DGKD	8527	1.18835	2.29201e-13	6.07721e-12
PCDHB12	56124	1.18697	1.19963e-12	2.80956e-11
SPRY3	10251	1.18696	2.62902e-16	1.07225e-14
RAB43	339122	1.18581	2.44955e-07	2.02846e-06
PDE4B	5142	1.18562	3.69508e-10	5.23933e-09
SLC8A1-AS1	100128590	1.18496	0.00409927	0.0119381
SLC41A1	254428	1.18391	1.55373e-12	3.55585e-11
ETV1	2115	1.18337	1.24365e-09	1.59889e-08
CHST15	51363	1.18336	3.59558e-11	6.29364e-10
SLC5A4	6527	1.18295	4.71553e-06	2.92699e-05
MYO7A	4647	1.18295	1.75834e-07	1.50476e-06
IL2RA	3559	1.18281	0.000615153	0.00226643
SOX18	54345	1.18251	1.3258e-06	9.28651e-06
SSH2	85464	1.18248	9.75846e-19	5.66601e-17
LIMS1	3987	1.18108	5.01353e-14	1.48646e-12
APH1B	83464	1.18086	5.19061e-20	3.62663e-18
LINC02688	101927503	1.18074	0.0210037	0.048449
RNF113B	140432	1.18022	0.0133874	0.0329941
CDC42EP2	10435	1.17866	4.26129e-07	3.34332e-06
HSF5	124535	1.17849	0.00268026	0.00824693
SOX30	11063	1.17819	1.22575e-06	8.63881e-06
MTOR-AS1	100873935	1.1775	0.00663476	0.0180753
PCDHA3	56145	1.17691	0.000382932	0.00148847
CDH26	60437	1.17648	1.12656e-08	1.21957e-07
OPN1SW	611	1.17619	0.0164967	0.0394233
EMID1	129080	1.17504	1.5053e-06	1.04072e-05
LINC01235	401492	1.17439	0.00307028	0.00929086
ADGRE2	30817	1.17439	4.95755e-12	1.03281e-10
LINC01273	101927541	1.17416	0.00358081	0.0106117
CASP5	838	1.174	8.26229e-05	0.000379844
ABHD17C	58489	1.17362	1.79319e-12	4.05944e-11
SH3TC1	54436	1.17352	5.4051e-08	5.14715e-07
PCDH10	57575	1.17313	0.00216063	0.00684714
CHEK1	1111	1.17269	4.02555e-17	1.85272e-15
RFX8	731220	1.17144	9.72568e-07	7.00802e-06
CEP55	55165	1.17129	6.82137e-08	6.38435e-07
ACOT11	26027	1.17088	1.6482e-10	2.53164e-09
MAP1B	4131	1.17032	7.09204e-16	2.70349e-14
ERC2	26059	1.16701	3.57199e-06	2.27517e-05
RGS3	5998	1.16596	7.88959e-14	2.25907e-12
CHST1	8534	1.16508	0.000139026	0.000606363
PHACTR2	9749	1.16454	7.14152e-11	1.17694e-09
DIAPH3	81624	1.16445	6.2179e-10	8.39869e-09
TREM1	54210	1.16272	0.0026117	0.00806977
HOXB5	3215	1.16158	1.11622e-05	6.31872e-05
SEPTIN11	55752	1.16065	6.4426e-10	8.68349e-09
NCAPG	64151	1.16064	1.17722e-08	1.26949e-07
BCYRN1	618	1.15976	0.00219325	0.00694087
SPATA13-AS1	100874231	1.15923	0.0175209	0.041515
TCIM	56892	1.15864	1.09316e-05	6.20918e-05
MAD2L1	4085	1.15789	9.79223e-08	8.85431e-07
STARD3NL	83930	1.15673	1.70179e-12	3.86609e-11
FAM124A	220108	1.15651	7.41706e-14	2.13596e-12
ACVRL1	94	1.1558	1.96807e-08	2.03651e-07
TBC1D9	23158	1.15557	8.6164e-12	1.70043e-10
ARRB1	408	1.15511	9.73866e-23	1.04839e-20
DCHS2	54798	1.155	0.00190779	0.00614578
ACSM4	341392	1.15329	1.06292e-05	6.05521e-05
RHOJ	57381	1.15216	1.23838e-09	1.59294e-08
TRIM24	8805	1.15151	5.91017e-22	5.51096e-20
SLC45A3	85414	1.15105	1.91203e-11	3.52642e-10
RAD51AP1	10635	1.15052	5.77815e-10	7.85546e-09
HLX	3142	1.14968	1.54905e-11	2.91265e-10
CAMKK2	10645	1.14813	6.6418e-22	6.08016e-20
GNG7	2788	1.14748	5.38725e-08	5.13406e-07
KCNQ1	3784	1.1469	1.49663e-07	1.30031e-06
BVES-AS1	154442	1.14589	5.38098e-06	3.29439e-05
GJC2	57165	1.14565	3.53181e-07	2.82129e-06
ANTXR2	118429	1.14516	7.54596e-13	1.84299e-11
MIR3153	100422936	1.14457	0.0168721	0.0402092
NDC80	10403	1.14403	5.97108e-09	6.83269e-08
SNTB1	6641	1.14372	1.74651e-15	6.40463e-14
NINL	22981	1.14212	3.85982e-08	3.77744e-07
SMC4	10051	1.14155	1.2637e-12	2.94586e-11
NPR1	4881	1.14145	3.4289e-07	2.75575e-06
CDC42BPA	8476	1.14052	7.23548e-19	4.26027e-17
NES	10763	1.14044	1.49555e-07	1.29982e-06
RPA4	29935	1.13973	0.00170298	0.00556197
SNORD109A	338428	1.13893	0.0121445	0.0304074
KCNG2	26251	1.13866	4.36868e-07	3.41688e-06
NRAS	4893	1.13669	8.90393e-14	2.52359e-12
PCDHB13	56123	1.13623	3.71315e-11	6.47685e-10
PTP4A3	11156	1.1354	1.72218e-06	1.17257e-05
AVPR1A	552	1.13402	1.18236e-05	6.65404e-05
IKBIP	121457	1.13365	2.62613e-09	3.19763e-08
FANCB	2187	1.133	5.87922e-10	7.97128e-09
PCDHB7	56129	1.13196	8.94908e-09	9.90162e-08
ONECUT2	9480	1.13168	0.0137825	0.0337902
TMSB4X	7114	1.13146	1.84122e-09	2.29882e-08
PCDHGA2	56113	1.12963	7.25773e-06	4.31184e-05
USP13	8975	1.12863	1.16572e-16	4.98123e-15
ITGB3	3690	1.12715	3.43946e-07	2.76247e-06
FAM72D	728833	1.12589	2.28892e-19	1.45349e-17
SALL4	57167	1.12534	0.0025249	0.00784438
CD93	22918	1.12487	8.5973e-08	7.86743e-07
PCDHGB2	56103	1.12415	3.26386e-06	2.09701e-05
STRIP2	57464	1.12115	1.11197e-09	1.44366e-08
RAI14	26064	1.12049	1.06388e-13	2.98827e-12
HDX	139324	1.11979	4.99389e-14	1.48239e-12
PTPRE	5791	1.11963	1.59247e-13	4.34645e-12
ITPKB	3707	1.11868	3.23063e-15	1.13176e-13
TSIX	9383	1.11864	0.0156769	0.0377729
ADAMTS9	56999	1.11777	2.95141e-08	2.95294e-07
DOCK4	9732	1.11693	8.58726e-11	1.39685e-09
ELK3	2004	1.11692	2.47553e-10	3.64613e-09
OXCT2	64064	1.1169	3.65629e-05	0.000183311
UCHL1	7345	1.11684	4.98228e-05	0.00024093
FAM124B	79843	1.11633	2.39877e-07	1.99299e-06
ZNF281	23528	1.11624	3.02634e-10	4.37772e-09
LINC00924	145820	1.11555	0.000637125	0.00233368
HBEGF	1839	1.11535	2.57264e-07	2.11989e-06
TBX2	6909	1.11523	1.70041e-05	9.23589e-05
PKN2-AS1	101927891	1.11494	1.23231e-05	6.89647e-05
MKI67	4288	1.11337	2.01099e-08	2.07494e-07
STARD4-AS1	100505678	1.11307	6.23891e-05	0.000294376
LINC02875	388407	1.1126	4.94253e-05	0.000239285
IGF2BP2-AS1	646600	1.11216	0.0169833	0.0404207
MAGI1-AS1	100873983	1.11129	0.00489853	0.0138867
PLEKHO2	80301	1.11106	1.16482e-10	1.83871e-09
TLR8	51311	1.11099	0.000151093	0.000652411
LINC01085	152742	1.1105	0.0016519	0.00542055
KCNJ2	3759	1.1099	2.32309e-08	2.37352e-07
SRGAP1	57522	1.10861	7.26669e-14	2.09506e-12
RGS16	6004	1.10851	1.76425e-05	9.53309e-05
TRAPPC3L	100128327	1.10845	0.00037951	0.00147769
ASAP1-IT2	100507117	1.10561	0.0093615	0.0243772
BRCA2	675	1.10347	3.80042e-07	3.01665e-06
KCNJ8	3764	1.10337	3.6163e-07	2.88236e-06
APP	351	1.10257	2.67215e-16	1.08455e-14
TNIK	23043	1.10249	3.32601e-08	3.28579e-07
TSPAN12	23554	1.10241	2.26564e-06	1.50302e-05
LINGO1	84894	1.10217	1.7899e-06	1.21341e-05
ADAM10	102	1.10214	2.73824e-13	7.14706e-12
CLIC2	1193	1.10117	1.16475e-07	1.03564e-06
MYL4	4635	1.10112	2.06384e-06	1.38267e-05
BCAR1	9564	1.09986	4.40613e-12	9.24072e-11
SPC25	57405	1.09953	5.24743e-07	4.02511e-06
SMYD2	56950	1.09938	1.30234e-11	2.48794e-10
SGTB	54557	1.09832	5.99469e-12	1.22832e-10
CMTM1	113540	1.09826	2.24681e-08	2.30216e-07
RAP1B	5908	1.09735	1.56565e-13	4.28724e-12
KLHL3	26249	1.09637	1.30276e-10	2.04232e-09
OAF	220323	1.09591	5.26721e-08	5.03496e-07
FMNL3	91010	1.09574	1.5131e-09	1.91393e-08
ARAP3	64411	1.09435	7.63199e-09	8.55758e-08
CDK6-AS1	101927497	1.09423	0.000533288	0.00199776
PKIG	11142	1.09412	5.07167e-13	1.27595e-11
RNF165	494470	1.09317	2.48602e-06	1.63281e-05
TOX2	84969	1.09179	1.40003e-06	9.75473e-06
MIR548V	100422850	1.09108	0.0206328	0.0477032
CENPI	2491	1.09102	1.27891e-10	2.0087e-09
PRKCQ	5588	1.08984	1.89296e-08	1.96527e-07
PLAT	5327	1.08956	3.98579e-09	4.70251e-08
LRRIQ1	84125	1.0889	0.0105163	0.026896
PDGFB	5155	1.08864	2.07081e-09	2.56251e-08
SMC2	10592	1.08839	1.13472e-11	2.1894e-10
FXYD2	486	1.08805	0.000366501	0.00143148
LYPD8	646627	1.08801	0.0181994	0.0428996
HMHB1	57824	1.08736	0.0109239	0.0277867
KIF4A	24137	1.08708	1.32343e-10	2.06956e-09
H3C1	8350	1.08657	0.0180212	0.0425316
FAM171B	165215	1.08489	1.31818e-09	1.68779e-08
NAALAD2	10003	1.08393	1.62313e-07	1.39907e-06
PPP1R16B	26051	1.08348	1.75013e-07	1.49876e-06
LINC00299	339789	1.08341	0.00251892	0.00783119
PLXND1	23129	1.08216	3.25675e-08	3.21991e-07
LOXL2	4017	1.07986	1.58591e-06	1.09015e-05
DGKH	160851	1.07906	1.27713e-15	4.75991e-14
GPR3	2827	1.0787	5.5626e-08	5.29312e-07
C3orf80	401097	1.07865	0.000157951	0.000678291
EFCAB14-AS1	100130197	1.0786	0.000793781	0.00283867
PLEKHG1	57480	1.07803	2.4163e-13	6.36639e-12
PECAM1	5175	1.07666	2.15087e-10	3.21249e-09
OLFML2A	169611	1.07646	2.83207e-10	4.12764e-09
TP53I3	9540	1.07611	1.20574e-10	1.89972e-09
SLC2A6	11182	1.07583	2.12664e-07	1.78854e-06
CALU	813	1.07405	3.87545e-09	4.58528e-08
IQSEC3	440073	1.07403	0.000394301	0.00152604
DOCK4-AS1	100506413	1.07364	0.0131296	0.0324623
FIRRE	286467	1.07342	5.95599e-05	0.000282729
ZNF578	147660	1.0724	1.35316e-12	3.13982e-11
UBE2J1	51465	1.07217	2.14283e-10	3.20314e-09
HEY1	23462	1.07153	8.27073e-08	7.60186e-07
PKN1	5585	1.07145	3.86804e-06	2.44638e-05
SALRNA2	104548973	1.0712	0.00976556	0.0252499
BRSK1	84446	1.07031	4.52026e-05	0.000220974
FKBP1A	2280	1.06999	2.21768e-11	4.05143e-10
LAIR2	3904	1.06903	0.00618064	0.0170025
CASP12	100506742	1.06871	0.000139113	0.000606635
LRRC73	221424	1.06854	0.000408144	0.00157548
C3orf70	285382	1.06837	1.97968e-12	4.4336e-11
ARHGAP26-AS1	100874239	1.06754	0.0153295	0.0370286
HOMER1	9456	1.06747	8.25627e-07	6.04472e-06
CASP4LP	643733	1.06667	0.000122286	0.000540682
ACOT9	23597	1.06651	7.99372e-17	3.48707e-15
C7orf61	402573	1.06523	6.16333e-08	5.8184e-07
KIF3C	3797	1.06479	4.98938e-12	1.03772e-10
CD276	80381	1.06395	1.54344e-12	3.53554e-11
USHBP1	83878	1.0638	6.62858e-07	4.96312e-06
TMEM255B	348013	1.06372	3.82451e-07	3.03384e-06
COLEC12	81035	1.06348	2.98761e-06	1.93589e-05
ODF2L	57489	1.06285	4.84284e-14	1.44267e-12
GALNT18	374378	1.06253	2.38703e-15	8.54122e-14
MIR6132	102466616	1.0623	0.00160682	0.00528784
LEPR	3953	1.06077	2.25562e-05	0.000119262
RPP25	54913	1.06012	3.68242e-10	5.22728e-09
PGAP4	84302	1.06001	8.3118e-12	1.6486e-10
KCNJ10	3766	1.05979	0.00085934	0.00304232
CCL8	6355	1.0594	0.000374204	0.00145884
NUF2	83540	1.05928	2.52886e-09	3.08369e-08
MIR6756	102465453	1.05851	0.0154203	0.0372125
DTL	51514	1.05839	1.04906e-09	1.36481e-08
KPNA2	3838	1.05724	6.90141e-11	1.14112e-09
EFCAB14	9813	1.05697	2.47152e-14	7.65348e-13
AADACP1	201651	1.05681	0.00342408	0.0101991
KLHL23	151230	1.05643	0.00439109	0.0126571
BCHE	590	1.05491	8.2893e-07	6.06182e-06
SLC2A13	114134	1.05489	1.12348e-09	1.45634e-08
PRTFDC1	56952	1.05471	2.11055e-09	2.60682e-08
DNAH14	127602	1.05456	6.23783e-08	5.87866e-07
TNFAIP6	7130	1.05423	0.000949727	0.00332107
CEP112	201134	1.05391	2.32869e-11	4.24495e-10
STEAP1B-AS1	100506178	1.05382	0.000572142	0.00212545
REEP1	65055	1.05378	1.92854e-08	1.99725e-07
LRCH2	57631	1.0532	6.48194e-06	3.89896e-05
NME5	8382	1.05244	7.84848e-05	0.000361877
H19	283120	1.0522	0.00210684	0.00670243
MYCBPAP	84073	1.05217	0.00275322	0.0084414
SH3BP5	9467	1.05215	3.46504e-06	2.21379e-05
SOCS2	8835	1.05167	1.41002e-10	2.19674e-09
CIT	11113	1.05131	4.62453e-13	1.17051e-11
TFPI	7035	1.05112	1.18937e-05	6.69051e-05
TRIM2	23321	1.05112	1.77496e-12	4.02181e-11
ACRV1	56	1.04976	0.000126613	0.000557947
CXXC4	80319	1.04942	4.055e-05	0.000200417
TLL2	7093	1.04898	0.00153693	0.00507917
ANO7	50636	1.04845	6.74088e-09	7.63692e-08
DIAPH2	1730	1.0483	9.96509e-18	5.06505e-16
PWAR1	145624	1.04823	0.00391585	0.0114731
LBH	81606	1.04804	1.53002e-12	3.51442e-11
TMEM30A	55754	1.04801	5.5825e-06	3.40282e-05
MIR186	406962	1.04737	0.00257237	0.00796676
MCM6	4175	1.04729	1.62547e-18	9.28739e-17
GRPR	2925	1.04691	0.000408796	0.00157727
CEP170	645455	1.04492	2.07849e-08	2.14018e-07
VIP	7432	1.04483	0.000519547	0.00195174
MMP14	4323	1.04473	3.07371e-14	9.37931e-13
RFPL3	10738	1.04462	0.0027239	0.00836478
SEMA6A	57556	1.0444	3.49546e-11	6.12694e-10
GASK1B	51313	1.04435	3.9539e-06	2.49687e-05
BCAP29	55973	1.0441	3.62508e-15	1.26114e-13
ST3GAL2	6483	1.04372	2.99646e-12	6.51867e-11
ZNF726	730087	1.04292	6.02721e-08	5.69847e-07
TUBA1A	7846	1.0429	1.12476e-10	1.78108e-09
SLC9A3R2	9351	1.04289	1.61419e-05	8.82877e-05
FOXD2-AS1	84793	1.04273	1.60694e-07	1.38702e-06
DNAJC22	79962	1.04244	1.36154e-05	7.55732e-05
FCGR3A	2214	1.04153	0.00141435	0.00472071
TEK	7010	1.04	8.98064e-08	8.17942e-07
LY96	23643	1.03998	0.000184713	0.000779994
CPVL-AS2	100506497	1.03997	3.2994e-07	2.65934e-06
CHIC1	53344	1.03844	1.8255e-12	4.12513e-11
NR1I2	8856	1.03843	0.0194845	0.0454521
S1PR1	1901	1.03829	1.6439e-07	1.41455e-06
GRK5	2869	1.03657	5.75735e-14	1.68508e-12
HTR1F	3355	1.0364	0.000167964	0.000716258
KIF20A	10112	1.03635	4.45173e-07	3.47534e-06
TNPO1	3842	1.03593	1.01351e-10	1.61717e-09
GTSF1	121355	1.03509	0.0163815	0.0392003
LETR1	400456	1.03485	1.85637e-06	1.25474e-05
ARHGEF7	8874	1.03481	6.6206e-19	3.91662e-17
RECQL	5965	1.03444	6.4705e-08	6.08776e-07
PHLDA1	22822	1.03394	8.69436e-13	2.09556e-11
CFL2	1073	1.0336	1.91269e-07	1.62465e-06
SKA3	221150	1.0325	3.90566e-06	2.46827e-05
FAM151A	338094	1.03231	5.92915e-06	3.59403e-05
DIP2A-IT1	100862692	1.0302	0.00235343	0.00738165
BICD1	636	1.0298	2.36644e-10	3.49572e-09
STIL	6491	1.02979	1.32162e-09	1.69047e-08
SCN1B	6324	1.02968	6.25262e-06	3.76915e-05
NEK2	4751	1.02967	3.357e-06	2.15072e-05
FZD4	8322	1.02949	2.66129e-08	2.68841e-07
MTMR6	9107	1.02884	1.27084e-13	3.54183e-12
ABI3	51225	1.02827	1.704e-08	1.78089e-07
TXNDC2	84203	1.02821	0.00448496	0.0128876
LINC01545	724087	1.02711	0.00198564	0.00636579
NRSN2	80023	1.02694	2.31603e-09	2.84351e-08
MCM10	55388	1.02685	2.88479e-08	2.89205e-07
MIR646HG	284757	1.02544	0.0123187	0.0307758
TLR1	7096	1.02451	3.19398e-07	2.58103e-06
GPIHBP1	338328	1.02424	0.000968855	0.00337618
ADGRD1	283383	1.02374	0.00118992	0.00405803
KALRN	8997	1.02295	3.36922e-11	5.92223e-10
DOCK6	57572	1.02147	2.3768e-12	5.25726e-11
TCFL5	10732	1.02063	2.74596e-11	4.9233e-10
ZNF85	7639	1.02018	7.2185e-14	2.08356e-12
DBN1	1627	1.01867	2.3562e-07	1.96087e-06
PBK	55872	1.01792	2.55548e-07	2.10783e-06
ECT2	1894	1.01735	1.56261e-10	2.41645e-09
MIRLET7A1	406881	1.01731	0.0175016	0.0414888
TTK	7272	1.01731	1.74988e-06	1.18949e-05
PKN3	29941	1.0172	1.9364e-08	2.00457e-07
NECTIN3	25945	1.01713	6.1535e-07	4.64764e-06
SLC38A1	81539	1.017	1.89933e-09	2.36666e-08
SHCBP1	79801	1.01696	4.98116e-09	5.76302e-08
SNX4	8723	1.01691	4.95601e-12	1.03281e-10
THAP10	56906	1.01684	5.36208e-14	1.57861e-12
RELT	84957	1.0165	6.85147e-10	9.19997e-09
ARL15	54622	1.01645	8.17441e-09	9.12907e-08
GDPD5	81544	1.01549	3.74303e-06	2.37387e-05
ZNF71	58491	1.01515	9.91734e-21	7.79802e-19
ZNF492	57615	1.01514	3.4501e-05	0.000173878
MGAT5	4249	1.01395	1.00584e-17	5.09689e-16
RASD1	51655	1.01372	8.69099e-06	5.06732e-05
SNCG	6623	1.01244	9.8602e-06	5.66216e-05
CCN3	4856	1.01091	4.42857e-06	2.76529e-05
MND1	84057	1.01091	2.60234e-06	1.7003e-05
SERPINI1	5274	1.01069	2.92943e-07	2.38181e-06
SH2B3	10019	1.00979	7.00629e-09	7.90804e-08
FBXL7	23194	1.00945	8.75583e-09	9.70922e-08
CABP4	57010	1.00909	1.64261e-09	2.06835e-08
ELMO1	9844	1.00907	5.14416e-12	1.06373e-10
PTPRB	5787	1.00869	1.11906e-08	1.2146e-07
ANLN	54443	1.00763	1.10467e-05	6.26462e-05
E2F7	144455	1.00742	5.2354e-08	5.00837e-07
MIR4645	100616285	1.0072	0.0205925	0.0476189
STARD8	9754	1.00714	1.78399e-07	1.5241e-06
TMTC4	84899	1.00629	1.41182e-12	3.25185e-11
PHOSPHO1	162466	1.00604	1.07249e-05	6.10423e-05
CMTM3	123920	1.00588	4.09918e-10	5.75376e-09
MERTK	10461	1.00438	5.94879e-07	4.50524e-06
LDB2	9079	1.00336	1.24942e-06	8.79081e-06
TPX2	22974	1.00311	5.02055e-10	6.90408e-09
KLHL2	11275	1.00106	3.01145e-14	9.24554e-13
ZNF608	57507	1.00096	2.39646e-09	2.93651e-08
DPH3	285381	0.999306	2.07528e-10	3.11633e-09
PITX3	5309	0.9987	0.0024705	0.00769577
SNX10	29887	0.998437	3.31139e-06	2.12537e-05
RECK	8434	0.99734	1.99677e-07	1.6892e-06
APLP2	334	0.997213	5.05808e-19	3.03521e-17
B3GNT2	10678	0.996801	3.87195e-12	8.26554e-11
CSPG4	1464	0.99678	7.16299e-06	4.25757e-05
BLM	641	0.995711	6.47397e-08	6.08873e-07
SKA1	220134	0.995011	1.17906e-06	8.33929e-06
SCLT1	132320	0.994988	8.33944e-15	2.77793e-13
TMC1	117531	0.994546	2.69983e-05	0.000139744
DAPK1	1612	0.993409	1.27847e-10	2.0087e-09
PHTF1	10745	0.993218	2.36354e-11	4.29911e-10
CSGALNACT1	55790	0.993036	4.17202e-08	4.05137e-07
CREB5	9586	0.992816	6.4207e-09	7.31382e-08
HEG1	57493	0.992713	3.29212e-09	3.94913e-08
RBM24	221662	0.992498	0.00755173	0.0202264
PPP1R2B	153743	0.99143	2.88361e-10	4.19545e-09
DOCK8	81704	0.991284	2.1143e-09	2.60989e-08
HSPA13	6782	0.991021	3.50635e-06	2.23734e-05
GNPNAT1	64841	0.990397	1.11179e-14	3.60296e-13
MIR7856	102465842	0.989177	0.0142581	0.0347811
FES	2242	0.988537	7.78929e-08	7.21134e-07
TEX38	374973	0.98805	0.0150096	0.0363824
ZFYVE16	9765	0.98776	1.20127e-10	1.89387e-09
FAM162B	221303	0.987165	4.88951e-07	3.77565e-06
DUSP6	1848	0.987055	6.21954e-11	1.03451e-09
LIPA	3988	0.986631	3.04264e-06	1.969e-05
SPATC1L	84221	0.986342	0.0153394	0.0370458
KLF2	10365	0.986241	2.54476e-05	0.000132758
DMTN	2039	0.985833	9.62399e-09	1.05691e-07
CCDC188	388849	0.985582	6.00202e-07	4.54007e-06
ADGRE5	976	0.985314	1.62705e-09	2.04979e-08
CCDC150	284992	0.985114	2.05098e-10	3.08606e-09
BTBD8	284697	0.98486	8.00852e-05	0.000368854
GLDC	2731	0.984744	0.0087565	0.0230006
AP2B1	163	0.984085	4.34215e-21	3.5827e-19
GJC1	10052	0.983991	3.87964e-06	2.45306e-05
IL12B	3593	0.981014	0.00312044	0.00941765
NEURL1	9148	0.980912	0.000115826	0.000515299
FAM72A	729533	0.980429	1.31932e-13	3.66879e-12
ACSL3	2181	0.98015	3.60126e-11	6.2948e-10
LINC01257	116437	0.979654	0.0208258	0.048083
PAQR8	85315	0.979384	1.8771e-12	4.22651e-11
GXYLT1	283464	0.97935	3.27783e-11	5.77373e-10
CDKN2B-AS1	100048912	0.979121	3.66954e-06	2.33138e-05
FAM72C	554282	0.97908	8.27111e-13	2.00255e-11
PEAK1	79834	0.978745	1.08608e-10	1.72419e-09
SH3RF3	344558	0.97867	1.62071e-10	2.49554e-09
SEMA6B	10501	0.978217	5.11491e-05	0.000246631
DISC1	27185	0.97766	0.000120925	0.00053542
FUT4	2526	0.976927	4.40269e-11	7.5587e-10
DYNLT5	200132	0.976925	1.19114e-05	6.69895e-05
MSR1	4481	0.976858	0.0026021	0.00804491
CDKN3	1033	0.976207	9.39621e-06	5.4168e-05
TUBB6	84617	0.975491	8.13541e-13	1.9716e-11
GNGT2	2793	0.97536	1.74002e-08	1.81778e-07
TCF4	6925	0.975038	2.99035e-11	5.31587e-10
MIR3667HG	348645	0.974722	0.00014143	0.000615348
FBXL19-AS1	283932	0.974682	1.53401e-10	2.37933e-09
KIF25	3834	0.974481	3.34551e-05	0.000169355
HOXD4	3233	0.974321	2.57911e-07	2.12383e-06
ATPSCKMT	134145	0.973654	4.7531e-11	8.08832e-10
FAM72B	653820	0.972945	1.36346e-13	3.78314e-12
LILRB1	10859	0.972742	0.00188922	0.00608936
FAM171A2	284069	0.972661	4.7708e-06	2.9591e-05
SPHK1	8877	0.97119	1.13202e-06	8.0324e-06
ROCK2	9475	0.970962	2.56365e-14	7.92898e-13
PTCRA	171558	0.970931	0.000778777	0.00279098
KIF20B	9585	0.96977	4.06526e-07	3.21061e-06
FHIP2A	57700	0.969483	7.67499e-13	1.86723e-11
PDE9A	5152	0.96926	5.35275e-05	0.000256914
CDKN2A	1029	0.969112	5.10416e-06	3.13947e-05
GALNT7	51809	0.96911	7.78578e-09	8.72223e-08
SHANK3	85358	0.969068	2.39906e-06	1.58274e-05
SOCS3	9021	0.968944	0.00225545	0.00710988
PPP2R3C	55012	0.968859	1.52514e-11	2.87417e-10
MIR4435-2HG	541471	0.968245	5.40872e-05	0.000259203
PCDHGA6	56109	0.968023	1.26173e-07	1.11279e-06
CEP57L1	285753	0.968002	1.05822e-13	2.9757e-12
NPPC	4880	0.967889	0.00700279	0.0189218
DSCC1	79075	0.96669	1.42549e-13	3.94217e-12
HOXB8	3218	0.965812	0.00144546	0.00481238
ASAP1	50807	0.965159	6.83767e-12	1.38537e-10
SMS	6611	0.964805	2.90275e-17	1.3686e-15
PLA2G4C	8605	0.964421	8.42638e-08	7.73076e-07
LAMC1	3915	0.963803	2.92437e-10	4.24736e-09
B3GNT7	93010	0.963621	0.000148757	0.000643657
GMFG	9535	0.963054	6.22602e-06	3.75673e-05
GNA12	2768	0.962307	8.81335e-15	2.91259e-13
H2AC11	8969	0.962097	0.00825909	0.0218688
GRAMD1A	57655	0.960619	4.61723e-10	6.39503e-09
BRCA1	672	0.960616	2.23045e-10	3.32224e-09
N6AMT1	29104	0.959395	7.75707e-12	1.5479e-10
PLXNA2	5362	0.959213	1.42311e-12	3.27484e-11
RRM2	6241	0.959156	2.43887e-06	1.60562e-05
PRKCZ	5590	0.957847	2.1039e-10	3.15183e-09
SPSB4	92369	0.957352	0.00450194	0.0129216
HMMR	3161	0.95706	7.57571e-06	4.47425e-05
UTRN	7402	0.956862	1.93906e-11	3.56842e-10
RAP1GDS1	5910	0.956561	1.27124e-14	4.11439e-13
SLC40A1	30061	0.955934	0.000650975	0.0023785
RGS7BP	401190	0.955086	0.0105975	0.0270683
SLC35A5	55032	0.954303	1.31172e-09	1.6824e-08
RPE65	6121	0.953503	0.0100459	0.0258629
TRAK2	66008	0.95309	6.14481e-12	1.25616e-10
CCT5	22948	0.952994	2.08739e-10	3.13145e-09
DNAJC10	54431	0.952658	3.71061e-11	6.47685e-10
NLN	57486	0.952481	1.23267e-12	2.88154e-11
CDC25A	993	0.951628	7.05789e-09	7.95296e-08
B3GNT8	374907	0.95143	1.65364e-06	1.12989e-05
ZNF98	148198	0.951308	0.00100877	0.00350504
ATP11A	23250	0.951251	5.7666e-11	9.63649e-10
MTBP	27085	0.949945	2.94451e-11	5.253e-10
HOXB6	3216	0.948683	7.2329e-05	0.000335968
RAG1	5896	0.947607	9.24975e-09	1.02163e-07
RASSF9	9182	0.947582	4.59996e-07	3.57992e-06
SLF1	84250	0.946949	5.5829e-11	9.37322e-10
MECOM	2122	0.946346	4.00193e-06	2.5237e-05
EPB41L4A-DT	54508	0.946229	6.06615e-11	1.01034e-09
CBLB	868	0.945848	1.563e-11	2.9301e-10
SLC35G2	80723	0.945328	4.56103e-09	5.31618e-08
MIR1915HG	399726	0.945185	1.34435e-07	1.17944e-06
ABCG1	9619	0.94434	1.75228e-11	3.25218e-10
SOCS4	122809	0.943997	4.53348e-11	7.7567e-10
KCNN3	3782	0.943922	0.000354219	0.00139065
CEP290	80184	0.943813	7.28719e-10	9.73812e-09
DOCK5	80005	0.943018	1.71436e-13	4.65885e-12
SACS	26278	0.94212	1.89843e-08	1.96932e-07
PARPBP	55010	0.941268	3.65108e-08	3.58996e-07
ZFHX4	79776	0.940907	3.59719e-05	0.000180457
PRR5L	79899	0.940771	9.81238e-07	7.06644e-06
DNAJC18	202052	0.94076	3.80113e-10	5.37569e-09
CD36	948	0.940488	0.00201657	0.00644682
ACSM2A	123876	0.940449	0.0184437	0.0433898
MOB1B	92597	0.940072	3.66942e-10	5.21177e-09
DYRK4	8798	0.939435	4.44331e-09	5.19346e-08
HAGLR	401022	0.939098	1.43136e-07	1.25053e-06
PLOD2	5352	0.938583	1.39521e-05	7.73223e-05
HOXA11-AS	221883	0.938492	0.000366274	0.00143126
PLK2	10769	0.938415	4.30585e-09	5.0469e-08
RXFP4	339403	0.937539	0.0215708	0.0496114
TMEM44	93109	0.937009	2.48744e-07	2.05577e-06
FOXD2	2306	0.93646	6.83881e-06	4.09008e-05
SBK3	100130827	0.936361	0.014665	0.0356437
PHF19	26147	0.936262	1.10672e-16	4.75339e-15
CNTLN	54875	0.936103	9.46545e-13	2.26548e-11
OLFM1	10439	0.936081	6.69825e-05	0.000313514
PTPN5	84867	0.936073	0.011866	0.0298081
CPAMD8	27151	0.935908	0.000458099	0.00174495
C2CD4A	145741	0.935877	0.00143764	0.00479017
CCDC168	643677	0.935378	0.00246848	0.00769152
ADAMTS6	11174	0.934663	0.000338962	0.00133851
ORC6	23594	0.934045	4.64618e-10	6.43157e-09
SYNJ1	8867	0.933955	1.24963e-10	1.96517e-09
MIR34A	407040	0.933741	0.00342968	0.0102121
TNS3	64759	0.933526	1.01712e-09	1.32394e-08
UXS1	80146	0.933476	1.84028e-12	4.15106e-11
BCL2L11	10018	0.933227	2.34474e-11	4.268e-10
UGGT2	55757	0.933187	1.70562e-10	2.60866e-09
CISD1	55847	0.932767	1.54717e-07	1.34064e-06
SYN3	8224	0.932067	5.83077e-06	3.53953e-05
MTMR2	8898	0.931748	6.21746e-13	1.53648e-11
WNT5A	7474	0.930441	5.22981e-06	3.20889e-05
FXYD6	53826	0.93041	7.72767e-05	0.000356704
DEPP1	11067	0.930333	7.24546e-05	0.000336489
ADAM9	8754	0.930216	2.205e-07	1.8473e-06
MINDY4	84182	0.929834	0.000449587	0.00171591
GCOM1	145781	0.92965	0.00289291	0.0088201
NT5E	4907	0.929389	0.00057159	0.00212371
NCEH1	57552	0.929152	3.21452e-08	3.1794e-07
BMP8B	656	0.928867	8.01078e-06	4.70793e-05
IL4I1	259307	0.928787	0.00239674	0.00749219
SGO1	151648	0.928383	4.21882e-08	4.09048e-07
MZT1	440145	0.928172	1.41036e-07	1.23304e-06
PDGFA	5154	0.928048	2.12837e-10	3.18531e-09
TMIGD3	57413	0.927652	0.0165122	0.0394565
TRIP13	9319	0.927521	9.45468e-09	1.03968e-07
DAPK3	1613	0.927111	5.89868e-07	4.47404e-06
TRMT10A	93587	0.927101	5.61982e-12	1.15515e-10
RDX	5962	0.926497	6.73747e-09	7.63651e-08
ZDHHC14	79683	0.926276	3.16251e-10	4.56154e-09
CDKL1	8814	0.925984	3.45506e-13	8.93435e-12
SVIL	6840	0.924894	1.73611e-13	4.70268e-12
CLEC1A	51267	0.924409	6.52896e-08	6.13815e-07
PIGK	10026	0.924404	2.49252e-08	2.52707e-07
DPY19L1	23333	0.924226	3.99948e-10	5.62642e-09
ATP11C	286410	0.924073	9.52308e-11	1.5381e-09
MGLL	11343	0.9237	2.72249e-08	2.74409e-07
MIRLET7I	406891	0.923535	0.00578364	0.0160655
BCL2A1	597	0.923419	0.00154734	0.00510819
CEACAM1	634	0.923399	5.00337e-06	3.08504e-05
EPHB4	2050	0.923032	8.75346e-13	2.10713e-11
PIK3CG	5294	0.922891	9.10723e-06	5.27811e-05
HELLS	3070	0.92285	5.64836e-09	6.48411e-08
TUBB3	10381	0.922774	0.000136597	0.000597451
TECPR1	25851	0.92172	2.84554e-09	3.44307e-08
RNF216-IT1	100874342	0.921487	0.00887787	0.0232592
LXN	56925	0.921201	8.24536e-08	7.58409e-07
NAV3	89795	0.920196	1.60802e-08	1.6862e-07
BUB1	699	0.920128	4.25548e-07	3.3398e-06
RHCE	6006	0.919944	0.0030631	0.00927249
MEGF6	1953	0.919506	2.39493e-06	1.58043e-05
SCARF1	8578	0.919265	1.40235e-07	1.22647e-06
ASRGL1	80150	0.919236	1.75018e-05	9.46525e-05
TNIP3	79931	0.918975	0.00217596	0.00689398
FAM111B	374393	0.918961	3.80002e-05	0.000189608
CDCA2	157313	0.917927	8.7127e-07	6.34002e-06
AGPAT4	56895	0.917763	7.44284e-12	1.4957e-10
MCTP1	79772	0.917079	3.65763e-06	2.32444e-05
PTGES3L	100885848	0.915317	0.00464556	0.0132655
ITGB3BP	23421	0.914587	8.81436e-07	6.40842e-06
ADAMTSL3	57188	0.913977	8.41855e-05	0.000386461
DMXL2	23312	0.91381	1.29095e-07	1.13657e-06
MMP11	4320	0.913227	0.00437247	0.0126124
LIX1	167410	0.913154	0.0029806	0.00905444
ADPRH	141	0.91308	1.5966e-09	2.01446e-08
DLC1	10395	0.9118	1.56539e-07	1.35469e-06
DGKI	9162	0.9115	0.000247924	0.00101629
RNF148	378925	0.91073	0.00765613	0.0204754
ZNF618	114991	0.910114	1.66312e-10	2.54988e-09
ZMAT3	64393	0.909979	1.31195e-09	1.6824e-08
CENPQ	55166	0.909758	2.40377e-08	2.44599e-07
STS	412	0.909558	2.55879e-09	3.11715e-08
ABHD17B	51104	0.90914	2.84409e-12	6.20872e-11
CCDC82	79780	0.908922	4.64101e-13	1.17349e-11
LTBP1	4052	0.908811	8.81937e-06	5.13263e-05
LETM2	137994	0.908781	3.20243e-11	5.66078e-10
GTSE1	51512	0.908589	8.03949e-08	7.42469e-07
GRB10	2887	0.908494	3.53445e-10	5.04867e-09
CCDC136	64753	0.907697	3.09826e-06	2.0019e-05
ICAM2	3384	0.907577	5.92344e-07	4.49011e-06
SCAMP5	192683	0.90705	0.000327244	0.00129877
RAPGEF2	9693	0.906062	3.92814e-12	8.37124e-11
LINC01132	100506810	0.905882	4.9343e-05	0.000238932
ZBTB47	92999	0.905539	3.87358e-07	3.07083e-06
SYDE1	85360	0.905436	1.03239e-08	1.12638e-07
SHC1	6464	0.90515	2.04706e-12	4.57633e-11
ARHGAP23	57636	0.902947	1.42192e-10	2.2139e-09
CPNE2	221184	0.902368	1.01163e-14	3.29971e-13
GUCY1A2	2977	0.901962	0.000756713	0.0027189
PWP2	5822	0.901165	2.38616e-08	2.43103e-07
CH25H	9023	0.900711	0.000849661	0.0030123
LINC01600	154386	0.900512	0.0041028	0.0119469
ACSM2B	348158	0.900278	0.0133411	0.0329009
PIMREG	54478	0.900024	2.66609e-06	1.73924e-05
GRM3	2913	0.89999	0.000667419	0.00243114
MYH10	4628	0.899853	1.35097e-11	2.57495e-10
PON2	5445	0.89976	6.706e-11	1.11028e-09
TMSB10	9168	0.899126	2.52192e-05	0.000131704
SNX2	6643	0.899057	7.23222e-11	1.18799e-09
SMARCA5	8467	0.8986	6.02914e-10	8.16571e-09
ADAMTS14	140766	0.897532	0.00100257	0.00348399
FAR2	55711	0.897306	0.00015657	0.000673048
CCNA2	890	0.896886	6.0025e-08	5.68154e-07
PLK4	10733	0.896734	8.15621e-09	9.1128e-08
ENC1	8507	0.896143	2.57756e-08	2.60908e-07
CFAP58	159686	0.895904	8.5304e-09	9.4844e-08
TDRD10	126668	0.895328	1.05862e-05	6.03762e-05
STARD13	90627	0.895006	1.52864e-11	2.87644e-10
RNF144A	9781	0.894626	3.25186e-10	4.67689e-09
MOSPD1	56180	0.894565	7.85241e-10	1.04268e-08
GNAI2	2771	0.894359	1.12929e-12	2.66975e-11
MRO	83876	0.893567	0.00347128	0.0103262
ALG10	84920	0.893334	5.24305e-08	5.01378e-07
PGM5P2	595135	0.893055	9.25838e-08	8.40796e-07
LY6G5C	80741	0.892997	0.0179679	0.042432
SCN3B	55800	0.891587	9.59509e-05	0.000435529
GRM1	2911	0.891574	0.00586724	0.0162635
SANBR	84542	0.891496	1.53382e-13	4.20927e-12
IQCK	124152	0.891494	1.40679e-13	3.89476e-12
RAB39A	54734	0.89075	0.000189746	0.000799362
SLFN12	55106	0.890509	1.01486e-11	1.97945e-10
PVR	5817	0.890308	1.42913e-13	3.9479e-12
FNBP1L	54874	0.890224	2.74774e-10	4.02109e-09
PTPN12	5782	0.889656	1.09675e-10	1.73783e-09
SIGLEC8	27181	0.889404	0.00412081	0.0119914
GUCY1B1	2983	0.888538	3.84632e-05	0.000191575
POGLUT2	79070	0.887401	1.43389e-08	1.51821e-07
CD300LF	146722	0.886104	0.00409026	0.0119159
ESCO2	157570	0.885997	7.3787e-07	5.45958e-06
WWC2	80014	0.885896	5.49794e-10	7.4989e-09
THEMIS2	9473	0.885318	1.01482e-05	5.8076e-05
TPM3	7170	0.885302	4.35974e-14	1.30808e-12
SKAP2	8935	0.885	6.33359e-09	7.22115e-08
CRYZL2P	730102	0.884569	8.58891e-12	1.69634e-10
UBTD1	80019	0.884468	7.41789e-07	5.47888e-06
WASHC4	23325	0.883938	5.65423e-08	5.3742e-07
HOXB-AS3	404266	0.883823	0.00851422	0.0224472
SPRY4-AS1	101926941	0.882624	0.00258184	0.00798919
CARD8	22900	0.882219	3.37538e-11	5.92889e-10
ZNF678	339500	0.881909	2.06384e-09	2.55514e-08
GJD3	125111	0.881841	4.88334e-09	5.66815e-08
GDF11	10220	0.881705	1.34464e-10	2.0988e-09
BIRC6-AS2	103752586	0.880894	0.00862545	0.0227046
RHOC	389	0.880858	1.18784e-07	1.05244e-06
MIR3916	100500849	0.880563	0.000149097	0.000645014
CACNA1A	773	0.880458	2.0393e-05	0.00010881
LAMB1	3912	0.879931	7.48399e-11	1.2246e-09
GATD3	8209	0.879582	9.25176e-06	5.34828e-05
WDHD1	11169	0.879491	6.21024e-09	7.09341e-08
AURKA	6790	0.878737	1.04435e-07	9.37221e-07
KIF11	3832	0.878733	3.29392e-07	2.65578e-06
ERCC6L	54821	0.878653	8.28378e-07	6.05955e-06
LINC01128	643837	0.876663	1.95372e-12	4.39508e-11
YWHAH	7533	0.876015	1.5342e-12	3.5208e-11
SNX25	83891	0.876003	9.69551e-14	2.73741e-12
TACC1	6867	0.875703	2.63379e-09	3.20384e-08
HK3	3101	0.875616	0.0034769	0.0103392
MCM5	4174	0.875445	3.61903e-10	5.14896e-09
KCTD17	79734	0.875018	8.96544e-06	5.20797e-05
HDGFL3	50810	0.874995	3.85925e-07	3.06044e-06
CASP10	843	0.874965	3.16467e-10	4.56203e-09
KANK2	25959	0.874625	5.1524e-07	3.9607e-06
FHOD1	29109	0.874051	8.58678e-10	1.1318e-08
LINC00472	79940	0.873694	3.16095e-06	2.03768e-05
NOL4L	140688	0.873321	1.24771e-08	1.33917e-07
MAN1A1	4121	0.87326	1.90857e-05	0.000102577
HMGB3	3149	0.87324	5.06638e-08	4.8578e-07
PPP1R2	5504	0.873064	1.0084e-10	1.61313e-09
BAX	581	0.872936	4.03001e-07	3.18578e-06
ST8SIA1	6489	0.872935	3.20209e-08	3.16947e-07
FNDC3B	64778	0.87266	2.25797e-08	2.31264e-07
GABPB1	2553	0.872384	1.80525e-10	2.74764e-09
AGPAT5	55326	0.871667	4.93907e-09	5.72489e-08
ASL	435	0.871657	3.42595e-07	2.75426e-06
PGM5	5239	0.871531	1.89442e-05	0.00010186
EXTL2	2135	0.871474	1.886e-10	2.85495e-09
TRIOBP	11078	0.87142	5.50427e-13	1.37788e-11
ZBTB46	140685	0.871416	5.62269e-07	4.28284e-06
FYN	2534	0.871281	4.08336e-13	1.04088e-11
SUCNR1	56670	0.870175	0.00553733	0.0154617
NCAM1	4684	0.870088	0.0036138	0.0106943
EXO1	9156	0.869636	1.14745e-06	8.13496e-06
JMJD1C-AS1	84989	0.868477	8.7621e-06	5.10285e-05
STAB1	23166	0.868222	0.00017369	0.000738419
SCIN	85477	0.868166	0.000315259	0.00125778
HAUS1	115106	0.867938	4.01873e-07	3.17786e-06
SMIM30	401397	0.867538	9.94345e-07	7.15056e-06
LRRC49	54839	0.866989	1.31143e-10	2.05335e-09
ARMT1	79624	0.866586	4.40468e-08	4.25588e-07
PTK2	5747	0.866282	6.22584e-16	2.4025e-14
P3H1	64175	0.866174	1.02958e-07	9.24961e-07
TMEM204	79652	0.865958	3.47703e-07	2.78907e-06
CD163L1	283316	0.865735	0.000420135	0.00161431
ZFPM2	23414	0.865405	1.03513e-06	7.40986e-06
PACSIN2	11252	0.865352	2.64361e-16	1.07646e-14
IQSEC1	9922	0.864829	1.81705e-11	3.36115e-10
TMX3	54495	0.864816	1.60316e-08	1.68181e-07
GOLIM4	27333	0.864757	7.31264e-09	8.22233e-08
ANXA2R-OT1	648987	0.864222	5.98277e-12	1.22703e-10
SOX17	64321	0.863468	0.000637699	0.00233509
SPDL1	54908	0.863219	5.05617e-11	8.55762e-10
CCDC18	343099	0.863144	1.30071e-11	2.48671e-10
SVIP	258010	0.863135	1.19722e-07	1.05962e-06
SLC16A3	9123	0.86307	6.41717e-05	0.000301653
ADGRA2	25960	0.863057	1.32078e-05	7.34895e-05
EOGT	285203	0.862835	2.11422e-12	4.71388e-11
SLC45A4	57210	0.861976	9.33599e-06	5.38828e-05
ECE1	1889	0.861815	8.34893e-10	1.10335e-08
SH2D1B	117157	0.861402	0.00361577	0.0106989
TLR2	7097	0.861082	1.98345e-06	1.33416e-05
ZNF792	126375	0.859586	6.12244e-13	1.51598e-11
RAD51	5888	0.859399	3.8662e-09	4.5765e-08
PLK1	5347	0.859341	8.53311e-07	6.22709e-06
FBLIM1	54751	0.859299	1.84847e-08	1.92227e-07
TCF19	6941	0.858586	8.0967e-08	7.46653e-07
WASF1	8936	0.858011	6.26174e-14	1.82632e-12
PEA15	8682	0.85781	1.07502e-13	3.0162e-12
APC	324	0.857696	1.20071e-08	1.29315e-07
SPC24	147841	0.857686	5.57873e-06	3.40135e-05
FPR2	2358	0.857661	0.00926517	0.0241654
TPD52L2	7165	0.857473	3.85561e-11	6.69275e-10
SUSD1	64420	0.857246	1.55977e-08	1.63903e-07
SGCB	6443	0.856962	7.27005e-08	6.77646e-07
SYNJ2BP	55333	0.856629	4.9845e-11	8.45914e-10
GCH1	2643	0.85638	1.97406e-07	1.67169e-06
MMP15	4324	0.856335	1.93089e-07	1.6379e-06
RASSF3	283349	0.856285	3.40279e-12	7.32638e-11
TMEM51	55092	0.856115	7.29724e-12	1.47041e-10
CD28	940	0.855931	0.00268589	0.00826221
SLFN5	162394	0.855866	1.53843e-05	8.44018e-05
CNRIP1	25927	0.855561	3.51596e-07	2.8149e-06
BUB1B	701	0.855558	3.20564e-06	2.06278e-05
ABCC9	10060	0.855558	0.000174203	0.000740222
DTNBP1	84062	0.855485	1.57712e-11	2.95436e-10
DSCR9	257203	0.855092	4.75537e-05	0.000231116
LINC01686	284648	0.855037	0.000102024	0.000459849
CDC25C	995	0.854946	1.03114e-05	5.89426e-05
PCDHGB4	8641	0.854455	3.00582e-05	0.000153711
KIF23	9493	0.853807	1.64219e-06	1.12451e-05
MICAL2	9645	0.853379	2.17503e-07	1.82463e-06
RNF175	285533	0.853077	1.02467e-06	7.34334e-06
NEDD1	121441	0.852983	1.47047e-09	1.8647e-08
DENND3	22898	0.852732	1.09357e-06	7.78817e-06
MAP3K11	4296	0.852336	1.10419e-06	7.85492e-06
H2AZ1	3015	0.851949	1.18306e-07	1.04895e-06
PLEKHA8P1	51054	0.851312	4.41882e-14	1.32422e-12
FZD8	8325	0.850775	1.15533e-05	6.51072e-05
TRIM9	114088	0.850715	0.00210963	0.00670926
ARHGAP11A	9824	0.849724	4.06806e-07	3.2108e-06
SEC23A	10484	0.849339	3.15155e-08	3.12329e-07
COL4A2-AS1	100874203	0.848637	0.0154809	0.0373479
DOCK10	55619	0.847846	1.26444e-06	8.8865e-06
HECTD2	143279	0.84743	9.70094e-09	1.06443e-07
PCDHB14	56122	0.846992	6.31784e-10	8.52449e-09
INPP4B	8821	0.846781	1.5564e-06	1.07133e-05
ASAP2	8853	0.846668	7.51152e-14	2.15821e-12
ITGAV	3685	0.84656	7.22148e-09	8.13e-08
DCP2	167227	0.846476	1.88844e-09	2.35426e-08
FANCM	57697	0.846395	1.32879e-09	1.69878e-08
PDIA5	10954	0.846123	1.28989e-09	1.65665e-08
GLIPR2	152007	0.845931	8.96213e-06	5.20725e-05
PARVB	29780	0.84583	1.4348e-05	7.93763e-05
RAB11FIP5	26056	0.845691	4.76162e-10	6.56601e-09
CYTOR	112597	0.845613	0.000244076	0.00100166
SLC35E4	339665	0.845451	6.47402e-07	4.86404e-06
CARD6	84674	0.845403	3.67244e-08	3.60814e-07
PHTF2	57157	0.845204	3.63687e-08	3.5788e-07
CAMSAP2	23271	0.845079	7.05668e-09	7.95296e-08
FGF1	2246	0.844946	3.68785e-05	0.000184598
IFNAR1	3454	0.844916	1.84801e-13	4.98427e-12
CALM1	801	0.84443	1.81186e-13	4.89729e-12
MRPL15	29088	0.844205	1.58662e-08	1.66585e-07
PRAG1	157285	0.843926	2.72915e-08	2.74921e-07
BTBD10	84280	0.843826	2.01663e-11	3.70572e-10
CRIP2	1397	0.843705	5.71706e-05	0.000272367
ARHGAP25	9938	0.843687	2.29476e-08	2.34649e-07
CALR	811	0.843534	2.71095e-08	2.73527e-07
FCER1G	2207	0.84348	0.00376877	0.0110911
DCLK3	85443	0.843222	0.000927609	0.00325391
HJURP	55355	0.842604	1.06537e-06	7.60897e-06
GNAQ	2776	0.842566	1.13921e-11	2.19536e-10
EPHA3	2042	0.841787	0.000412595	0.00159021
DIMT1	27292	0.841564	1.80309e-10	2.74602e-09
SPRED2	200734	0.841467	3.23029e-11	5.70199e-10
OSBPL10	114884	0.841372	1.59919e-13	4.36005e-12
GPR85	54329	0.841168	0.000460834	0.00175404
AMZ1	155185	0.840926	0.00058036	0.00215152
RAB17	64284	0.840339	0.000944156	0.00330358
MID1	4281	0.84026	6.10789e-10	8.25899e-09
LINC01410	103352539	0.840151	4.74579e-05	0.000230695
GPSM1	26086	0.839888	5.42364e-05	0.000259868
GLIS3	169792	0.839772	6.08398e-06	3.6781e-05
G6PC3	92579	0.839758	1.92283e-07	1.63161e-06
ROCK1	6093	0.83959	3.82787e-10	5.40317e-09
ZNF69	7620	0.839453	5.89874e-11	9.84865e-10
TIMP3	7078	0.839376	1.24003e-06	8.73451e-06
BIN1	274	0.83921	9.32421e-05	0.000424309
PCDHB6	56130	0.839079	5.03088e-06	3.09972e-05
ADCY4	196883	0.837917	9.32361e-06	5.38237e-05
PSIP1	11168	0.837425	1.58807e-10	2.45129e-09
SLC9A9	285195	0.837268	6.81703e-09	7.71623e-08
ZNF233	353355	0.83708	4.15761e-10	5.82274e-09
LINC00664	400680	0.836773	0.0117595	0.0295732
IMPG1	3617	0.836576	0.000488347	0.0018481
LYSMD3	116068	0.836389	1.66306e-06	1.13509e-05
EXTL3	2137	0.835973	2.85999e-12	6.23801e-11
TNFRSF10D	8793	0.835973	4.59529e-05	0.000224336
ERAP2	64167	0.835972	0.00559115	0.015586
TXNDC9	10190	0.83595	2.61409e-07	2.14629e-06
PCDHA7	56141	0.835764	0.00472363	0.0134548
ARHGAP31	57514	0.835593	5.76343e-11	9.63649e-10
ZNF230-DT	101928063	0.834434	0.000916284	0.00322031
MRPL17	63875	0.834122	1.50996e-07	1.31007e-06
LRRC40	55631	0.833703	5.48036e-07	4.18523e-06
SCAI	286205	0.833297	1.3544e-10	2.11271e-09
ITGA4	3676	0.8332	0.00113134	0.00387775
PROS1	5627	0.833131	1.10583e-07	9.88155e-07
CCNB1	891	0.832185	5.73518e-06	3.48234e-05
FAM78A	286336	0.832162	1.7509e-05	9.46711e-05
ZNF583	147949	0.831553	1.04578e-10	1.6676e-09
RALA	5898	0.83139	1.85073e-12	4.17088e-11
TBC1D1	23216	0.831298	1.21234e-10	1.90892e-09
BMERB1	89927	0.831228	1.59451e-08	1.67343e-07
CKS2	1164	0.830927	0.00023644	0.000973671
PITPNC1	26207	0.830911	5.65334e-07	4.30227e-06
NKAIN4	128414	0.830324	0.0116074	0.0292523
ZNF341-AS1	101929746	0.829796	3.97903e-05	0.000197401
ADAMTSL1	92949	0.829558	0.00284663	0.00869379
TGFB1I1	7041	0.828069	5.4535e-06	3.33228e-05
MCF2L	23263	0.82754	1.46842e-07	1.27957e-06
RAMP2-AS1	100190938	0.827286	9.72583e-05	0.000440826
INKA2	55924	0.827237	5.70267e-10	7.76126e-09
PGAP6	58986	0.826966	2.78825e-07	2.2781e-06
LILRB2	10288	0.826061	0.00606578	0.0167306
NUSAP1	51203	0.825528	4.38829e-06	2.74219e-05
PCBP3	54039	0.824761	0.000972344	0.00338787
HTR7P1	93164	0.824533	2.25185e-10	3.35211e-09
EDA2R	60401	0.823875	0.000117435	0.000521902
SPTBN1	6711	0.823501	4.18396e-11	7.19796e-10
LMBR1L	55716	0.823256	4.04725e-10	5.68406e-09
ZWILCH	55055	0.82249	2.16787e-08	2.22582e-07
RIMKLB	57494	0.822135	8.08337e-13	1.96088e-11
FKBP3	2287	0.822065	1.07693e-06	7.68062e-06
APBB2	323	0.821906	2.14173e-10	3.20314e-09
ACTR2	10097	0.82183	4.47903e-07	3.49339e-06
RALB	5899	0.82183	1.26612e-11	2.42428e-10
SH3PXD2B	285590	0.821702	2.30268e-10	3.41562e-09
SPINDOC	144097	0.821498	1.756e-09	2.20119e-08
ARMCX3	51566	0.820963	1.48291e-09	1.87764e-08
DENND11	57189	0.820798	8.57537e-08	7.85883e-07
NPAT	4863	0.8206	5.87618e-07	4.45832e-06
TUBB	203068	0.820308	4.55769e-11	7.79281e-10
MS4A7	58475	0.820216	0.01048	0.0268099
ZNF43	7594	0.819985	9.95397e-10	1.29769e-08
BIRC5	332	0.819926	2.80709e-05	0.000144639
C4orf46	201725	0.819769	4.16725e-10	5.83298e-09
TMEM163	81615	0.819643	0.00469228	0.0133798
RSU1	6251	0.819244	8.64891e-09	9.60339e-08
SPAG5	10615	0.819177	2.28127e-10	3.38788e-09
NREP	9315	0.818797	0.000108196	0.00048533
HDAC1	3065	0.818662	1.59509e-12	3.64055e-11
FSD1L	83856	0.818578	3.58032e-07	2.85549e-06
SUV39H2	79723	0.818476	1.27768e-08	1.3684e-07
MAN2A1	4124	0.817955	2.46501e-08	2.50425e-07
TFEC	22797	0.817752	0.00634509	0.0173901
ERGIC1	57222	0.817263	7.86613e-18	4.06817e-16
SAMD9	54809	0.816785	0.000276554	0.00111974
ZNF486	90649	0.816519	1.03341e-07	9.27735e-07
SESTD1	91404	0.816112	1.09764e-07	9.81539e-07
AKT3	10000	0.815978	2.18511e-05	0.000115998
NIBAN1	116496	0.81567	1.10952e-08	1.20529e-07
RP2	6102	0.814897	4.12178e-07	3.24707e-06
ZNF268	10795	0.814775	3.69279e-10	5.23904e-09
SHROOM4	57477	0.814143	6.90361e-06	4.12391e-05
TSPAN11	441631	0.814101	0.000237504	0.00097677
FOXM1	2305	0.814085	3.9722e-08	3.87533e-07
COLGALT1	79709	0.813911	7.26462e-11	1.19253e-09
PCDHB10	56126	0.813511	3.70724e-09	4.40288e-08
ATAD2	29028	0.812909	2.22548e-07	1.86321e-06
CCT8	10694	0.812824	4.18609e-08	4.06189e-07
MEX3A	92312	0.812683	3.7191e-08	3.6497e-07
KIF15	56992	0.812167	5.21106e-07	4.00334e-06
FBXO43	286151	0.811945	3.11496e-05	0.000158774
HLTF	6596	0.811359	6.26788e-08	5.90377e-07
CORO1C	23603	0.810748	1.33108e-10	2.08022e-09
GIMAP4	55303	0.810685	1.44431e-06	1.00298e-05
TBC1D30	23329	0.810264	6.84787e-09	7.74414e-08
CENPN	55839	0.810215	3.63307e-09	4.32298e-08
UHRF1	29128	0.810024	3.68096e-06	2.33805e-05
LACC1	144811	0.809943	1.77787e-06	1.2059e-05
SAE1	10055	0.809245	1.39165e-12	3.21721e-11
INHBA	3624	0.808207	0.00700773	0.018931
CDC27	996	0.807606	6.25159e-09	7.1374e-08
DLEU2	8847	0.807102	2.94492e-07	2.3931e-06
LRP2BP	55805	0.807099	1.20578e-07	1.06683e-06
L3MBTL3	84456	0.806887	2.94443e-09	3.55414e-08
RTCA	8634	0.806217	1.65812e-12	3.77753e-11
KIF4B	285643	0.805676	0.000863523	0.00305411
B3GLCT	145173	0.805675	7.84154e-10	1.04179e-08
KCNJ2-AS1	400617	0.805611	6.22331e-06	3.756e-05
ATP8A2	51761	0.805361	0.00210192	0.00669068
ST3GAL1	6482	0.805333	1.5107e-06	1.04388e-05
PTPRN2	5799	0.805169	3.86891e-08	3.78486e-07
RADIL	55698	0.805104	0.00698574	0.0188859
CD99L2	83692	0.804787	7.52161e-08	6.97982e-07
VPS26C	10311	0.80415	2.41091e-15	8.60212e-14
GRM2	2912	0.80389	0.00305864	0.00926301
GINS1	9837	0.803603	1.3786e-08	1.46647e-07
C4orf48	401115	0.803473	0.000699816	0.00253736
LTN1	26046	0.802711	3.61834e-06	2.30236e-05
LRP6	4040	0.802706	7.17258e-11	1.18129e-09
C2orf74-DT	339803	0.802633	3.74504e-08	3.67084e-07
FHL3	2275	0.801959	6.66986e-08	6.25655e-07
POLK	51426	0.801644	1.34728e-06	9.42118e-06
CCDC85B	11007	0.800917	0.000943913	0.0033035
MIB1	57534	0.800838	1.48978e-08	1.57024e-07
POPDC2	64091	0.800549	9.932e-05	0.000448711
FLT1	2321	0.800353	2.51097e-06	1.64704e-05
ITSN1	6453	0.799909	8.19734e-10	1.08503e-08
LEPROTL1	23484	0.799726	4.09928e-09	4.8228e-08
EFCC1	79825	0.799523	0.000618327	0.002277
DPYSL2	1808	0.798716	1.726e-10	2.63822e-09
GJA5	2702	0.798709	0.00342145	0.0101949
RB1	5925	0.798177	1.12103e-06	7.95891e-06
SIPA1	6494	0.79801	0.000121824	0.000538832
SNAP23	8773	0.796845	3.06685e-08	3.05746e-07
ZNF521	25925	0.796713	1.61337e-06	1.10659e-05
COL12A1	1303	0.796137	0.00233207	0.00732291
PRUNE2	158471	0.795034	4.148e-05	0.000204461
OAZ3	51686	0.793811	2.55895e-06	1.67457e-05
FZD9	8326	0.793464	4.54486e-05	0.00022209
SLC35A1	10559	0.792368	4.95262e-09	5.73265e-08
TOR1A	1861	0.792324	2.00147e-13	5.36928e-12
GPR180	160897	0.792125	9.97882e-09	1.09158e-07
FOXN2	3344	0.792002	3.21095e-07	2.59305e-06
MCM3AP	8888	0.791719	4.28269e-12	9.02711e-11
SOCS2-AS1	144481	0.79146	1.74455e-05	9.43684e-05
ZNF90	7643	0.791233	1.13261e-07	1.01028e-06
RIPOR1	79567	0.791226	2.88952e-07	2.35547e-06
SRFBP1	153443	0.791205	3.02253e-07	2.45036e-06
RHOBTB1	9886	0.791091	2.63073e-09	3.20168e-08
ORC1	4998	0.790805	1.79117e-07	1.5292e-06
NT5DC4	284958	0.790342	0.00962443	0.0249416
ZNF483	158399	0.790086	4.8997e-06	3.03006e-05
RP1L1	94137	0.79006	0.000695018	0.00252143
ZNF382	84911	0.790056	1.19043e-06	8.41114e-06
MIS18BP1	55320	0.789736	2.8506e-07	2.32677e-06
VPS37A	137492	0.789733	1.29295e-10	2.0282e-09
WDR54	84058	0.789535	3.51093e-07	2.81177e-06
MEX3B	84206	0.788806	1.44415e-05	7.98228e-05
PIK3C2A	5286	0.788011	2.76752e-06	1.80165e-05
EXOC5	10640	0.787948	8.71658e-08	7.96495e-07
CHM	1121	0.787865	3.52636e-07	2.81873e-06
TAMALIN	160622	0.787713	4.55885e-05	0.000222687
MAPRE2	10982	0.78766	3.63803e-09	4.32682e-08
TTF1	7270	0.787536	2.6254e-17	1.25195e-15
F2R	2149	0.786909	1.2589e-05	7.03082e-05
DCUN1D4	23142	0.786722	1.63029e-10	2.50875e-09
IFTAP	119710	0.786188	2.18591e-06	1.45397e-05
ATP4B	496	0.785733	0.019005	0.0445268
TMCO3	55002	0.78515	1.94377e-10	2.93708e-09
CASKIN2	57513	0.785064	3.51986e-09	4.20022e-08
EPB41L2	2037	0.78487	3.35859e-06	2.15072e-05
VRK1	7443	0.784828	2.49107e-09	3.04501e-08
IGSF21	84966	0.783394	0.00140065	0.00468245
SIGLEC7	27036	0.783312	0.0175171	0.0415132
CFAP206	154313	0.783268	6.34342e-05	0.000298746
CNTNAP1	8506	0.783128	4.36665e-06	2.73071e-05
TBCD	6904	0.781903	8.11593e-08	7.47947e-07
PRR16	51334	0.78109	0.000288077	0.00116115
TMEM263	90488	0.780901	6.08307e-08	5.74696e-07
CEP41	95681	0.780248	6.44366e-09	7.32999e-08
DRAM1	55332	0.780185	8.10331e-06	4.75228e-05
DCLK2	166614	0.780134	1.32886e-06	9.30536e-06
XKR5	389610	0.780074	0.0135038	0.0332238
UBE2T	29089	0.779956	4.89443e-05	0.000237185
UNC5B-AS1	728978	0.779573	0.0128254	0.0318202
C3AR1	719	0.779307	0.00139042	0.00465135
KNOP1	400506	0.77886	3.11311e-15	1.09518e-13
FGFR4	2264	0.77857	0.000508455	0.0019161
ZIK1	284307	0.77854	3.27133e-10	4.69959e-09
NLK	51701	0.778531	1.19359e-12	2.80064e-11
AJAP1	55966	0.778528	0.00192577	0.00619364
MYRF	745	0.778355	0.00261484	0.00807835
ZXDA	7789	0.778137	2.84376e-09	3.44257e-08
VOPP1	81552	0.777856	4.56799e-07	3.55724e-06
SLCO3A1	28232	0.77783	2.93687e-10	4.26305e-09
CRMP1	1400	0.777752	2.5849e-07	2.1272e-06
SERPINB9	5272	0.777644	1.46509e-05	8.08554e-05
GNLY	10578	0.777392	0.0102514	0.0263055
GNS	2799	0.77734	8.18031e-09	9.13159e-08
TRAF5	7188	0.777264	5.53024e-07	4.22011e-06
CCPG1	9236	0.777108	1.78204e-08	1.85936e-07
LZTS3	9762	0.776791	1.43132e-06	9.95886e-06
FCGR1A	2209	0.776782	0.00788154	0.0209935
NOTCH4	4855	0.775443	0.000356945	0.00139938
HIF1A	3091	0.774857	0.00039349	0.00152384
WDR7	23335	0.774551	1.48066e-09	1.87573e-08
SYNM	23336	0.774523	3.68961e-05	0.00018465
ARRDC3	57561	0.774454	1.01739e-05	5.82099e-05
CHML	1122	0.77396	1.48215e-06	1.0267e-05
ZNF738	148203	0.773547	9.47747e-11	1.53271e-09
PAFAH1B2	5049	0.773407	1.11865e-12	2.64708e-11
ZNF670	93474	0.773334	9.24682e-08	8.40051e-07
PRKCE	5581	0.772655	5.00181e-10	6.88208e-09
ZWINT	11130	0.772377	7.17938e-07	5.3294e-06
ANKRD26	22852	0.772069	9.27669e-08	8.42155e-07
DYNC1I1	1780	0.771999	1.6793e-07	1.44154e-06
LCP2	3937	0.771617	1.5701e-05	8.60264e-05
NHSL2	340527	0.77151	1.88278e-05	0.000101299
H2AC15	8330	0.771381	0.00393055	0.0115148
HSPA5	3309	0.771216	1.83234e-10	2.77707e-09
CDCA5	113130	0.771156	1.71807e-05	9.31772e-05
CUBN	8029	0.771143	1.37221e-06	9.58216e-06
DDIAS	220042	0.770812	2.85513e-05	0.000146903
SNX14	57231	0.770441	1.10053e-12	2.60914e-11
GINS4	84296	0.77044	2.85204e-08	2.8661e-07
SLC22A4	6583	0.770148	2.25323e-07	1.8833e-06
BTBD3	22903	0.770082	2.3664e-08	2.41385e-07
PGS1	9489	0.770043	1.55629e-11	2.91971e-10
COMMD8	54951	0.769626	8.90744e-06	5.18028e-05
PRKAR1B	5575	0.769407	8.31052e-06	4.86244e-05
TRDMT1	1787	0.769326	8.76566e-09	9.71582e-08
FRMD4B	23150	0.769215	4.63268e-09	5.39468e-08
DLGAP1	9229	0.769206	0.020115	0.046675
WIPF1	7456	0.768537	4.85997e-06	3.00771e-05
TCEA2	6919	0.768384	0.000151852	0.000654903
FKBP7	51661	0.768291	0.000121431	0.000537472
ADAMTS1	9510	0.768139	0.000600463	0.0022185
UBE2S	27338	0.768132	0.000159147	0.000682957
PDE1A	5136	0.768079	0.00137443	0.00460769
PCDHGA8	9708	0.767833	1.7185e-05	9.31803e-05
HDAC9	9734	0.767827	0.000148152	0.00064137
C2CD6	151254	0.767713	0.002355	0.00738472
IPMK	253430	0.767587	6.04896e-06	3.6587e-05
HABP4	22927	0.767394	4.91784e-07	3.79434e-06
FAM107B	83641	0.767144	6.35284e-07	4.78523e-06
KCNIP1	30820	0.766795	0.00638234	0.0174807
C8orf58	541565	0.766541	3.3337e-07	2.68441e-06
GIMAP8	155038	0.766246	4.94915e-06	3.05386e-05
SYCP2	10388	0.765087	1.69737e-05	9.22539e-05
KIF2C	11004	0.764718	3.02421e-06	1.95758e-05
SNRK	54861	0.764649	4.28272e-09	5.02214e-08
DPY19L4	286148	0.764629	2.34864e-07	1.95587e-06
ARL11	115761	0.764011	7.32567e-07	5.42675e-06
INAFM2	100505573	0.763944	1.14863e-09	1.48664e-08
STAU2	27067	0.763573	3.85103e-09	4.56284e-08
RPS27L	51065	0.76305	2.60931e-06	1.70425e-05
CRACD	57482	0.762525	0.00369195	0.0108922
FAT4	79633	0.762342	0.000112673	0.000503328
JAM3	83700	0.762327	3.57243e-09	4.25687e-08
UBE2W	55284	0.761933	8.9376e-07	6.48674e-06
PCDHGA7	56108	0.761191	7.29679e-05	0.000338497
C1orf198	84886	0.761176	2.3462e-10	3.46992e-09
KIAA1614	57710	0.761096	2.98481e-07	2.42213e-06
ECI2	10455	0.760569	5.14259e-07	3.95437e-06
BAIAP2-DT	440465	0.760013	3.52791e-08	3.47704e-07
SREK1IP1	285672	0.759036	5.00505e-06	3.08532e-05
GMFB	2764	0.75811	1.82322e-05	9.83269e-05
FAM171A1	221061	0.758015	6.84401e-08	6.40314e-07
CLIC4	25932	0.757946	8.28588e-06	4.84915e-05
CCDC28A-AS1	100507462	0.756946	9.61922e-05	0.000436546
MANEA	79694	0.756483	6.02897e-05	0.000285707
ZNF100	163227	0.756481	8.92061e-07	6.47816e-06
KRT222	125113	0.756408	0.0106485	0.0271742
EFCAB13-DT	102724508	0.755977	0.000699463	0.00253682
DNAL1	83544	0.755857	1.66023e-10	2.54701e-09
YES1	7525	0.755716	8.30581e-07	6.07035e-06
FDX1	2230	0.755593	4.11964e-10	5.77602e-09
CEP19	84984	0.755495	9.91933e-07	7.13936e-06
CTBP2	1488	0.755364	2.04379e-13	5.47697e-12
HHEX	3087	0.755071	1.50282e-06	1.03958e-05
ADAMTS12	81792	0.754368	0.0035675	0.0105748
DENND5A	23258	0.754326	4.19109e-09	4.9262e-08
MIR4444-2	100846999	0.754237	0.00279799	0.00855669
CRPPA	729920	0.754061	2.3707e-06	1.56608e-05
HS3ST1	9957	0.753485	2.09464e-05	0.000111384
CDC42	998	0.753449	9.19024e-08	8.35213e-07
TRIM38	10475	0.752826	3.13701e-12	6.79497e-11
PTHLH	5744	0.752452	0.00600652	0.0166055
GIMAP6	474344	0.752212	1.95384e-05	0.000104808
MAGED1	9500	0.751879	1.10461e-08	1.20099e-07
TMEM184B	25829	0.751619	1.3905e-09	1.77045e-08
IBTK	25998	0.751585	2.98718e-08	2.98635e-07
PLEKHO1	51177	0.751438	0.000296933	0.0011929
CSRNP3	80034	0.751353	3.12675e-05	0.00015931
COMMD2	51122	0.751306	3.09888e-08	3.08418e-07
C1orf112	55732	0.75118	5.10994e-09	5.90385e-08
ARHGEF10	9639	0.750777	1.09667e-12	2.60244e-11
LUZP1	7798	0.750531	1.14918e-10	1.81631e-09
C1QC	714	0.750482	0.0126931	0.031551
ZCCHC10	54819	0.749734	1.01968e-07	9.17711e-07
GNA15-DT	100996351	0.749722	0.00586693	0.0162635
POLQ	10721	0.749637	1.97305e-05	0.00010568
CLIP2	7461	0.749429	3.72467e-06	2.36401e-05
DARS2	55157	0.748841	9.99855e-11	1.60149e-09
UNC13A	23025	0.74828	0.0192163	0.044949
KLC1	3831	0.748245	2.52808e-12	5.56732e-11
TMEM231	79583	0.7482	3.15817e-11	5.59043e-10
TMEM132B	114795	0.748182	0.000523703	0.00196618
ADA	100	0.747748	9.28497e-06	5.36501e-05
SLC16A13	201232	0.747598	3.75037e-05	0.000187429
NAT1	9	0.747291	2.06851e-07	1.74754e-06
SNAPC3	6619	0.747184	9.87195e-11	1.58616e-09
ELFN1	392617	0.747	0.000391553	0.00151751
CADPS2	93664	0.746366	2.13717e-07	1.79587e-06
KLRB1	3820	0.745672	0.00712834	0.0192183
SLC43A3	29015	0.74566	4.56043e-09	5.31618e-08
HASPIN	83903	0.745549	4.51345e-06	2.81129e-05
TAF13	6884	0.745367	8.52239e-05	0.000390728
TUBA1B	10376	0.745112	4.4226e-07	3.45582e-06
CPEB2	132864	0.745091	1.35232e-05	7.5128e-05
PTPRK	5796	0.74488	4.90253e-06	3.03031e-05
MAGI1	9223	0.74468	8.01139e-11	1.30827e-09
ZNF449	203523	0.744524	2.42755e-09	2.97025e-08
CTIF	9811	0.744259	2.97036e-05	0.000152175
SELENON	57190	0.744192	4.34463e-09	5.08285e-08
AGAP1	116987	0.744066	9.40441e-09	1.03467e-07
CDH6	1004	0.743857	0.00359271	0.0106394
LBR	3930	0.743846	3.70455e-09	4.40176e-08
VPS13A	23230	0.743845	4.60645e-05	0.000224749
KHDRBS3	10656	0.743743	7.69477e-06	4.53816e-05
CDC25B	994	0.743702	1.18168e-06	8.35167e-06
PRKAA1	5562	0.743489	2.33877e-07	1.9483e-06
C15orf39	56905	0.743384	2.6767e-07	2.19339e-06
IL6ST	3572	0.743202	8.98698e-06	5.21692e-05
MXRA7	439921	0.743081	1.35987e-06	9.5013e-06
FKBP10	60681	0.742982	0.000579643	0.0021495
PDE8A	5151	0.742634	7.86599e-13	1.91185e-11
ATRX	546	0.742096	4.35024e-06	2.72384e-05
TMEM47	83604	0.741544	0.000113431	0.000506172
ARPC5	10092	0.741459	1.14586e-07	1.02059e-06
PXN	5829	0.741437	4.10813e-08	3.99551e-07
ANGPT1	284	0.741284	0.00228725	0.00719928
PAK2	5062	0.741225	1.30959e-09	1.68109e-08
ASCC3	10973	0.741123	1.28242e-06	9.00026e-06
TRPC6	7225	0.741108	5.84715e-05	0.000278036
KIAA1549	57670	0.74092	5.01883e-05	0.00024251
HMOX1	3162	0.740353	0.00363576	0.0107466
GABPA	2551	0.740128	5.83243e-06	3.53967e-05
CCNB2	9133	0.740098	1.99966e-05	0.000106968
BEX3	27018	0.739889	4.85902e-07	3.76053e-06
PIF1	80119	0.739816	0.000202166	0.000846002
GSDME	1687	0.739574	0.000144696	0.000628496
[truncated: 7,774 more rows]

## Sheet: 3-C4vsC1
	entrez	log2FoldChange	pvalue	padj
KCTD16	57528	4.53336	3.44632e-23	1.48021e-21
CLPS	1208	20.4916	4.89772e-17	9.96346e-16
MMP12	4321	5.19256	7.8322e-16	1.37285e-14
ACOD1	730249	4.43889	1.09105e-13	1.43507e-12
OTOG	340990	4.93877	1.30458e-12	1.4874e-11
CXCL8	3576	4.58792	8.74558e-12	8.88479e-11
HTR3C	170572	4.5558	2.95553e-11	2.81235e-10
ORF70	HHV8GK18_gp12	4.73296	1.5594e-09	1.16551e-08
K15	HHV8GK18_gp85	4.45208	1.61726e-08	1.03802e-07
MAGEA4	4103	4.65438	7.74103e-07	3.8113e-06
LYPD4	147719	4.71034	0.0010125	0.00271445
SLC6A18	348932	4.85383	0.0351094	0.0635159
HTN1	3346	4.22077	3.66326e-06	1.59856e-05
ORF63	HHV8GK18_gp71	4.12315	1.89997e-07	1.0367e-06
F13B	2165	4.09249	1.74423e-09	1.29401e-08
ORF72	HHV8GK18_gp82	4.08664	2.57477e-10	2.14632e-09
CD5L	922	4.00872	1.57415e-12	1.77858e-11
GAGE2E	729428	3.99892	0.00568354	0.0127536
DNTT	1791	3.89365	2.52449e-06	1.13684e-05
NLRP5	126206	3.84333	0.00193874	0.00487318
MYBPC2	4606	3.83142	3.66364e-09	2.59444e-08
LINC02475	100506827	3.82487	3.46711e-06	1.51746e-05
SLITRK1	114798	3.81738	0.00353911	0.00837037
CRX	1406	3.7668	0.00771064	0.0167219
ORF64	HHV8GK18_gp72	3.75106	4.64915e-09	3.2348e-08
MAGEB2	4113	3.7476	0.000742235	0.00204903
KIF25-AS1	100505879	3.70553	5.36561e-10	4.28447e-09
H2AB3	83740	3.70092	4.14164e-13	5.02344e-12
DMRTC2	63946	3.62409	0.0192372	0.0374603
ORF68	HHV8GK18_gp77	3.61641	1.1606e-10	1.01788e-09
CNTNAP4	85445	3.60829	2.48218e-10	2.07397e-09
ORF60	HHV8GK18_gp67	3.54849	1.58506e-09	1.18327e-08
RNASE9	390443	3.53421	1.25728e-05	4.96713e-05
ADGRE1	2015	3.53194	7.74209e-16	1.35896e-14
ORF62	HHV8GK18_gp69	3.52408	6.03842e-07	3.03774e-06
ORF75	HHV8GK18_gp86	3.52068	7.34587e-07	3.63319e-06
MUC17	140453	3.51396	0.00416987	0.0096998
ECEL1P2	347694	3.5091	3.0408e-09	2.17238e-08
PRG3	10394	3.50653	0.012417	0.0254832
SERTM1	400120	3.50392	9.66333e-07	4.68468e-06
STATH	6779	3.49463	0.000655408	0.00183314
RNA5S6	100169757	3.47468	0.000506508	0.00145214
EIF4E1B	253314	3.46218	0.000161954	0.000514671
HOXD13	3239	3.4588	6.07956e-08	3.58724e-07
NLRP13	126204	3.45603	0.0423031	0.0746931
LINC00642	400238	3.43879	1.8481e-06	8.52129e-06
ALPG	251	3.43521	2.99417e-08	1.84347e-07
HSPE1-MOB4	100529241	3.42643	0.000531628	0.00151687
ORF74	HHV8GK18_gp84	3.4124	3.70662e-10	3.02057e-09
VAT1L	57687	3.4043	3.45566e-11	3.26349e-10
IL21	59067	3.40358	8.35055e-06	3.40969e-05
NKX2-5	1482	3.39244	6.13456e-05	0.000211364
TAFA4	151647	3.37677	9.71721e-07	4.70716e-06
ORF67	HHV8GK18_gp74	3.37459	1.96424e-10	1.66788e-09
SCUBE1	80274	3.37313	3.86301e-13	4.70597e-12
GHSR	2693	3.3721	3.17016e-06	1.39837e-05
H2AC12	85235	3.33004	2.56648e-06	1.15306e-05
MAGEA1	4100	3.32931	0.042455	0.0749032
IQCA1	79781	3.32466	3.85958e-15	6.17411e-14
MYH6	4624	3.3246	3.89895e-05	0.000139551
TDO2	6999	3.29844	5.69294e-18	1.31126e-16
LRRC38	126755	3.28445	1.71585e-09	1.27371e-08
ORF55	HHV8GK18_gp59	3.27159	7.9161e-06	3.24975e-05
ZNF560	147741	3.27109	2.70296e-07	1.43823e-06
RAB4B	53916	3.24763	0.0026992	0.00656493
K14	HHV8GK18_gp83	3.2337	2.51206e-06	1.13185e-05
K13	HHV8GK18_gp80	3.21213	3.04664e-08	1.87439e-07
HTN3	3347	3.2035	0.00111406	0.00296098
NANOS2	339345	3.2024	0.00150912	0.00388278
GYPA	2993	3.20192	1.07357e-05	4.30028e-05
K2	HHV8GK18_gp10	3.20087	7.69594e-06	3.16662e-05
ORF34	HHV8GK18_gp38	3.20014	0.000691342	0.00192207
ALPP	250	3.19285	1.2846e-08	8.3758e-08
GOLGA6L2	283685	3.19221	0.00566487	0.0127209
CLEC4M	10332	3.1885	1.33534e-07	7.45312e-07
CEMIP	57214	3.18643	3.26958e-15	5.28762e-14
LINC01915	729950	3.17744	1.01315e-22	4.17975e-21
GAGE12J	729396	3.17732	0.0144449	0.0291092
SNORA38	677820	3.16632	0.00291017	0.00702085
LINC01583	101929690	3.166	1.74376e-11	1.70721e-10
DCDC2C	728597	3.15775	6.31508e-10	5.00319e-09
FFAR3	2865	3.13927	1.69759e-11	1.66526e-10
CCNYL2	414194	3.12122	1.95859e-09	1.44153e-08
LINC02349	100506530	3.1022	0.000931991	0.00252006
LINC01501	340515	3.09668	0.000208026	0.000645782
ADAMTS20	80070	3.08866	0.000412566	0.00120751
WT1	7490	3.08706	6.90404e-07	3.43599e-06
SEMA3A	10371	3.08303	1.2087e-19	3.41801e-18
LY6H	4062	3.0777	8.72456e-08	5.00316e-07
ARMC3	219681	3.07769	0.000140651	0.000452243
IFNG-AS1	100885789	3.05876	9.82145e-09	6.5217e-08
FGF16	8823	3.05847	2.42578e-06	1.09455e-05
CLEC4G	339390	3.05738	9.33665e-10	7.21254e-09
ORF2	HHV8GK18_gp09	3.04371	4.34701e-08	2.61941e-07
SOX11	6664	3.03733	2.69756e-08	1.66987e-07
vIRF-2	HHV8GK18_gp65	3.02941	3.24158e-06	1.42747e-05
MIR548P	100302288	3.02588	0.000354795	0.00105056
IL2RA	3559	3.01654	7.77762e-20	2.25533e-18
SEMA3D	223117	3.01433	2.11187e-18	5.13294e-17
OR8G5	219865	3.00868	0.0144053	0.0290433
ORF66	HHV8GK18_gp75	3.00632	7.19894e-08	4.2003e-07
OR4D6	219983	2.98525	1.66437e-07	9.17523e-07
DAO	1610	2.97475	6.89641e-05	0.000234999
LINC02101	101928569	2.97454	8.71087e-06	3.54527e-05
OR1F1	4992	2.97405	0.0154983	0.0309594
K12	HHV8GK18_gp79	2.97365	2.42883e-05	9.03357e-05
CLDN14	23562	2.96906	8.66863e-13	1.01039e-11
LRRC3B	116135	2.95833	2.08344e-08	1.31469e-07
PMCH	5367	2.9526	1.28313e-09	9.72935e-09
LINC02685	221122	2.95254	0.000268906	0.000815102
LINC01518	101929397	2.95248	0.00130615	0.00341344
XKRY	9082	2.93639	0.030463	0.0560645
ORF44	HHV8GK18_gp47	2.93553	4.52686e-07	2.32251e-06
UNC45B	146862	2.92891	4.75488e-19	1.24626e-17
LYZL4	131375	2.92138	0.0441247	0.0773917
SCN2A	6326	2.90191	7.92332e-14	1.06621e-12
SSX1	6756	2.88684	0.0118136	0.0243905
CCDC141	285025	2.88576	1.60923e-20	5.10942e-19
ORF56	HHV8GK18_gp60	2.88382	4.41935e-06	1.89585e-05
AGBL1-AS1	727915	2.87804	0.000205236	0.000637909
HOXD12	3238	2.87694	0.0010734	0.00286123
ORF54	HHV8GK18_gp58	2.87523	6.88577e-05	0.000234668
FGB	2244	2.874	0.00105117	0.00280944
MUC13	56667	2.87186	1.44061e-06	6.77572e-06
GAGE12G	645073	2.86567	0.00406643	0.00947955
TLR8	51311	2.86262	2.19118e-24	1.07979e-22
CTLA4	1493	2.85993	5.42406e-15	8.50854e-14
H2AB2	474381	2.85641	1.10693e-09	8.45208e-09
MMP13	4322	2.85374	4.60168e-10	3.70304e-09
GPRIN3	285513	2.84541	8.03931e-22	2.98741e-20
CHRNA7	1139	2.84521	1.70192e-17	3.66118e-16
DUXAP8	503637	2.84002	2.72043e-15	4.43959e-14
UNC5D	137970	2.83258	1.26792e-08	8.27992e-08
MIXL1	83881	2.83045	8.33706e-13	9.75821e-12
OR1G1	8390	2.81357	0.00233385	0.00576749
NRSN1	140767	2.81105	0.000694731	0.00192978
VAX1	11023	2.79689	0.00517321	0.0117196
H2BC3	3018	2.79627	4.47643e-05	0.000158568
CTCFL	140690	2.79326	0.000182773	0.000574425
ACAN	176	2.79305	9.31524e-10	7.20044e-09
MROH2B	133558	2.78722	8.82899e-12	8.96226e-11
CFAP54	144535	2.78175	3.39343e-15	5.47379e-14
LINC02347	100128554	2.7754	8.96929e-07	4.37187e-06
HOXD11	3237	2.77462	7.9056e-08	4.57325e-07
ZNF728	388523	2.77332	1.33131e-11	1.32146e-10
SERTM2	401613	2.75842	0.00184448	0.00465818
MORC1	27136	2.75496	1.90854e-05	7.24673e-05
F2RL3	9002	2.75444	8.09313e-16	1.41463e-14
AKR1D1	6718	2.74792	0.0205707	0.039721
vIRF-4	HHV8GK18_gp63	2.7474	1.29815e-05	5.11491e-05
MRGPRX4	117196	2.74693	0.0378119	0.0677455
DUXA	503835	2.74201	0.0227857	0.0434258
SCHIP1	29970	2.74063	6.93427e-08	4.05437e-07
SCN10A	6336	2.73364	0.00840715	0.0180483
KCNK17	89822	2.73095	7.70225e-09	5.20322e-08
C3P1	388503	2.72142	0.00340986	0.00810245
TMEM235	283999	2.71814	3.84039e-08	2.32847e-07
ADD2	119	2.71734	7.0185e-18	1.5975e-16
CTRB2	440387	2.71442	0.00070864	0.00196494
BLOC1S5	63915	2.7137	2.66227e-06	1.19097e-05
HOXB9	3219	2.70347	1.79368e-14	2.61727e-13
CHRNA1	1134	2.70162	1.27117e-08	8.2925e-08
LIPC-AS1	101928694	2.69332	3.38516e-09	2.40811e-08
KCNJ10	3766	2.68571	2.0652e-18	5.02439e-17
NAA11	84779	2.68559	0.00828128	0.017804
ARHGAP36	158763	2.68259	4.69854e-06	2.0067e-05
PCDHA1	56147	2.68236	5.28994e-07	2.6887e-06
SNCB	6620	2.67814	7.27646e-13	8.5688e-12
CST1	1469	2.66182	0.00980682	0.0207005
TEX19	400629	2.65846	0.00238413	0.00588015
PTCHD4	442213	2.6536	1.72271e-12	1.93944e-11
vIRF-1	HHV8GK18_gp62	2.64249	1.96694e-05	7.4583e-05
PROX1	5629	2.64086	6.62823e-16	1.17082e-14
RXFP3	51289	2.63706	0.000413481	0.00120998
LINC01204	101927528	2.62953	2.26518e-05	8.48148e-05
GOLGA8CP	729786	2.61434	5.74686e-10	4.57324e-09
BCYRN1	618	2.60997	1.2579e-12	1.43744e-11
ADAMTS5	11096	2.60653	4.18038e-22	1.60577e-20
CASP5	838	2.60034	1.32438e-19	3.72834e-18
SPACA3	124912	2.59634	0.00692616	0.015202
PCDH17	27253	2.59514	3.26353e-12	3.52234e-11
ARPC4-TTLL3	100526693	2.59007	0.00083327	0.00227505
SCN1A	6323	2.58895	1.25067e-08	8.17582e-08
SPIC	121599	2.58832	1.1156e-06	5.34123e-06
PRAMEF20	645425	2.58704	0.0315578	0.0578123
BRINP3	339479	2.58654	2.2569e-05	8.4531e-05
ORF69	HHV8GK18_gp78	2.58142	2.133e-06	9.73295e-06
ORF47	HHV8GK18_gp49	2.5799	1.19355e-06	5.68833e-06
LINC01502	100130954	2.57359	1.90092e-05	7.21999e-05
MROH5	389690	2.55985	1.47691e-09	1.10914e-08
LINC00559	100874187	2.5598	0.0124621	0.0255675
CXCL5	6374	2.55819	7.14767e-06	2.96094e-05
H4C2	8366	2.55818	7.46004e-05	0.000253083
IBSP	3381	2.55736	0.000693748	0.00192727
ANKRD36BP2	645784	2.55556	7.82108e-14	1.0543e-12
BCAT1	586	2.5554	7.49998e-17	1.49422e-15
GOLGA8F	100132565	2.55492	3.20352e-08	1.96224e-07
H2BC14	8342	2.55422	4.72272e-05	0.000166446
SCN3A	6328	2.55041	2.29521e-11	2.21681e-10
SPP1	6696	2.5502	2.56105e-06	1.15082e-05
ZP2	7783	2.54605	1.15732e-07	6.50144e-07
RTP1	132112	2.54487	0.0145135	0.029231
RMST	196475	2.53909	0.00745508	0.0162282
ADARB2	105	2.53865	5.34485e-11	4.93067e-10
ANO4	121601	2.53838	2.4741e-13	3.08658e-12
ZNF99	7652	2.53831	1.33961e-14	1.99061e-13
HAR1B	768097	2.53831	1.48514e-07	8.23342e-07
LINC02999	102546229	2.5366	0.0227871	0.0434258
DRC7	84229	2.53452	2.99172e-10	2.4709e-09
MYL2	4633	2.53412	3.84945e-06	1.67138e-05
MS4A8	83661	2.52941	0.028699	0.0532123
PANX3	116337	2.5292	0.0103898	0.0217753
MRC1	4360	2.52887	8.73843e-18	1.96756e-16
IL13RA2	3598	2.52584	9.52968e-07	4.62525e-06
LINC01205	401082	2.52442	0.0436776	0.0767364
CFAP161	161502	2.522	1.18689e-20	3.83643e-19
HOATZ	399949	2.52102	6.00866e-12	6.22791e-11
ORF59	HHV8GK18_gp70	2.52046	6.45076e-05	0.000221347
PCAT5	102578074	2.52038	2.15004e-05	8.08539e-05
LINC02209	286135	2.51958	0.0311626	0.0571885
SLC26A4	5172	2.51592	4.73685e-17	9.65971e-16
vIRF-3	HHV8GK18_gp64	2.51514	0.000136095	0.000439
CR1	1378	2.51499	1.50304e-14	2.21769e-13
GTSF1	121355	2.51202	1.49298e-09	1.1202e-08
PRKCQ-AS1	439949	2.50342	1.08203e-17	2.40608e-16
ORF61	HHV8GK18_gp66	2.50341	7.66032e-05	0.000259408
LINC00507	100862680	2.50228	0.00165728	0.00422582
LHX8	431707	2.49323	0.0211116	0.0406154
RBM46	166863	2.49321	0.0109575	0.0228222
FILIP1	27145	2.48916	1.20017e-16	2.33182e-15
IL1B	3553	2.4865	1.0714e-09	8.2083e-09
HBG1	3047	2.48514	0.00371607	0.00874638
LOX	4015	2.48162	2.28956e-23	9.98766e-22
STK33	65975	2.48102	1.34929e-17	2.94526e-16
MSANTD5	102724657	2.48069	0.00291083	0.00702177
ABCC13	150000	2.47966	0.000773559	0.00212848
LINC01667	441058	2.47966	0.0124882	0.0256021
C6orf118	168090	2.4794	0.000520401	0.00148738
OPRM1	4988	2.4784	0.000671818	0.00187486
COL22A1	169044	2.47708	2.52974e-06	1.139e-05
ZNF730	100129543	2.47349	7.41922e-18	1.68261e-16
OR10V1	390201	2.4725	0.000486759	0.00140161
ZNF556	80032	2.47181	0.000139995	0.000450306
PIEZO2	63895	2.46811	3.54031e-17	7.35721e-16
K7	HHV8GK18_gp18	2.46608	0.000504623	0.00144723
CNTNAP5	129684	2.46478	2.09887e-05	7.90716e-05
GABRB2	2561	2.4591	2.79024e-06	1.24555e-05
LINC01235	401492	2.45538	9.45295e-11	8.39917e-10
TMEM26	219623	2.45524	1.5607e-13	2.00652e-12
SCN9A	6335	2.44516	2.19837e-15	3.62536e-14
CLRN3	119467	2.44494	8.37105e-06	3.4175e-05
SLC22A16	85413	2.4443	6.93123e-13	8.18917e-12
HMGA2-AS1	100129940	2.44078	5.09811e-14	7.03775e-13
LINC00689	154822	2.43483	1.73415e-06	8.04472e-06
IFNG	3458	2.43402	1.12476e-10	9.8748e-10
LILRB1	10859	2.43349	5.39695e-16	9.67631e-15
DNAJC12	56521	2.43089	5.52817e-16	9.87629e-15
OR6M1	390261	2.42937	0.0477038	0.082755
LINC00606	285370	2.42731	3.74466e-05	0.00013447
LYVE1	10894	2.42505	1.03286e-14	1.55791e-13
KISS1	3814	2.42471	3.29368e-05	0.00011949
H2AC4	8335	2.41991	0.000226069	0.000697221
HNF1B	6928	2.41864	0.00163878	0.00418386
LINC01648	101929406	2.41648	1.55235e-05	6.01353e-05
GPR182	11318	2.41613	1.17269e-16	2.2802e-15
ORF67A	HHV8GK18_gp73	2.41554	0.000154467	0.000493001
PCDHA2	56146	2.40993	2.63002e-09	1.90606e-08
MIR181B1	406955	2.40979	3.32844e-05	0.000120699
RGS8	85397	2.40699	7.95965e-09	5.3569e-08
ORF46	HHV8GK18_gp50	2.40652	1.01606e-06	4.90113e-06
RTP3	83597	2.40416	2.59613e-06	1.16471e-05
PCDH9	5101	2.40315	4.27735e-17	8.78696e-16
STC1	6781	2.39963	1.71512e-09	1.27354e-08
LANA	HHV8GK18_gp81	2.39952	7.63823e-08	4.4329e-07
SLC35G3	146861	2.39905	0.00205389	0.00513585
CPA6	57094	2.39769	8.20053e-06	3.35608e-05
SEMA7A	8482	2.38807	8.03049e-19	2.04496e-17
LGI2	55203	2.38805	1.15003e-15	1.95436e-14
NOS2	4843	2.38099	3.53969e-10	2.89394e-09
DRD3	1814	2.37565	5.30706e-05	0.000185374
ST6GAL2	84620	2.37441	1.23246e-09	9.36215e-09
LIN28B	389421	2.37401	0.0463773	0.0806827
MIR503	574506	2.37273	1.74857e-08	1.11573e-07
LINC00943	100507206	2.36953	1.57444e-09	1.1757e-08
TM4SF18	116441	2.36699	4.22298e-16	7.65907e-15
ORF48	HHV8GK18_gp48	2.3659	4.5304e-06	1.93984e-05
NT5C1A	84618	2.36244	0.000273263	0.000826811
ORF58	HHV8GK18_gp68	2.35869	0.000370665	0.0010933
CD38	952	2.35736	8.18651e-13	9.59543e-12
GPR174	84636	2.35212	4.83811e-11	4.48796e-10
NKX6-1	4825	2.35	2.14168e-05	8.05756e-05
RNU6-1	26827	2.34867	0.000115953	0.000378901
ABCA4	24	2.34396	2.00993e-12	2.24666e-11
GAGE2A	645037	2.34079	0.0388038	0.0692998
CYP4F30P	100132708	2.33941	0.0031703	0.00757844
NOX4	50507	2.33227	1.22569e-18	3.04999e-17
IL6	3569	2.33134	1.44658e-05	5.64476e-05
PDPN	10630	2.33096	1.57538e-20	5.00826e-19
SYNJ2BP-COX16	100529257	2.33063	0.00131097	0.00342412
CELA3B	23436	2.32795	0.0421375	0.0744374
CALCRL	10203	2.32597	1.46264e-12	1.65632e-11
SERPINA5	5104	2.32126	3.77098e-08	2.28914e-07
MIR551A	693135	2.3208	3.79575e-05	0.000136129
C16orf82	162083	2.31815	0.0122976	0.0252671
OTOGL	283310	2.31668	2.48881e-18	5.96814e-17
CLEC17A	388512	2.31624	1.19061e-08	7.80353e-08
PIWIL1	9271	2.31583	0.00490068	0.0111732
SPATA48	100130988	2.31498	0.00398389	0.00931034
HEMGN	55363	2.31334	8.05771e-06	3.30194e-05
LOXHD1	125336	2.31212	1.10673e-12	1.27398e-11
ZNF479	90827	2.30783	0.0109712	0.0228468
ZNF679	168417	2.29844	0.033439	0.0608055
SLC2A7	155184	2.2972	2.19025e-12	2.43304e-11
RAB39B	116442	2.29408	7.97145e-19	2.03199e-17
NRXN3	9369	2.29191	8.32161e-16	1.44852e-14
RASGRF2-AS1	102524628	2.29115	3.29782e-11	3.1262e-10
FOXG1	2290	2.29114	0.000477701	0.00137758
LINC02104	101926940	2.2911	1.45152e-10	1.25554e-09
KCNQ3	3786	2.28992	3.35052e-14	4.74005e-13
UNC5A	90249	2.28765	1.50039e-10	1.29327e-09
PGM2L1	283209	2.28653	2.52615e-21	8.825e-20
EPYC	1833	2.28278	0.000833001	0.00227457
LINC01788	101927244	2.27361	1.26871e-08	8.28293e-08
SBK2	646643	2.27225	0.000132844	0.000429344
CDC20B	166979	2.2701	1.67903e-05	6.44751e-05
CREB3L3	84699	2.26852	0.00145571	0.0037604
HMGA2	8091	2.26826	8.76068e-11	7.82008e-10
RFPL4A	342931	2.26735	0.0414402	0.0733864
MIR581	693166	2.26687	1.40016e-05	5.48239e-05
IGFBP1	3484	2.26368	0.01262	0.0258428
FCRL3	115352	2.26234	7.55283e-12	7.75471e-11
LINC01732	101928973	2.25901	0.000109001	0.000358521
MYL10	93408	2.25871	0.013008	0.0265323
BCL2A1	597	2.25778	7.01148e-16	1.23417e-14
LINC01182	101929071	2.25651	8.27559e-10	6.46656e-09
PLA2G2D	26279	2.25624	2.34477e-06	1.06162e-05
LINC02226	729506	2.25597	9.68532e-05	0.000321515
HCCAT5	283902	2.25149	2.58412e-10	2.15341e-09
ZMAT4	79698	2.25002	9.11011e-06	3.69457e-05
KNL1	57082	2.24951	3.72602e-17	7.72395e-16
LINC01085	152742	2.24426	3.87291e-11	3.63156e-10
OC90	729330	2.24389	0.0153296	0.0306653
KLF17	128209	2.23465	3.09762e-05	0.000112933
C14orf39	317761	2.23338	0.000245445	0.000750334
ADGRD1	283383	2.23123	1.46063e-13	1.88753e-12
ORF40	HHV8GK18_gp44	2.22997	0.000113901	0.000372731
IGF1	3479	2.2247	9.68346e-14	1.28107e-12
CDH17	1015	2.22322	8.75599e-10	6.81012e-09
SIX3	6496	2.22196	0.0191623	0.0373406
SPAM1	6677	2.21959	0.0147158	0.0295973
TEX36	387718	2.21858	0.00663923	0.0146414
DISP3	57540	2.21573	7.51699e-09	5.08629e-08
PCDHA3	56145	2.21559	5.75491e-12	5.99462e-11
SV2B	9899	2.21165	4.14785e-17	8.5349e-16
XAGE1A	653220	2.20786	0.0113578	0.0235464
LRRN2	10446	2.20733	1.28295e-12	1.46473e-11
LINC02538	401286	2.20538	2.30961e-11	2.22986e-10
GRM5	2915	2.20526	2.41396e-05	8.98892e-05
MMP1	4312	2.20449	5.45628e-05	0.000190189
ISL2	64843	2.20117	4.73057e-07	2.42157e-06
GJA8	2703	2.19915	0.0274754	0.0512199
GDF15	9518	2.19819	2.03701e-09	1.4953e-08
CCL4L2	9560	2.19742	3.74097e-11	3.51573e-10
SIGLEC12	89858	2.19615	3.36574e-07	1.76211e-06
PCDHAC2	56134	2.19388	1.35892e-09	1.02668e-08
FCGR3A	2214	2.19238	2.04779e-12	2.28287e-11
ORF31	HHV8GK18_gp35	2.19007	0.00735538	0.0160375
THSD7A	221981	2.19003	8.16951e-16	1.426e-14
NR1H4	9971	2.18817	0.00490081	0.0111732
LRRIQ4	344657	2.18725	8.84404e-10	6.87434e-09
CNTN6	27255	2.18561	2.32758e-07	1.25231e-06
ZNF716	441234	2.18322	0.0111626	0.0231992
ORF53	HHV8GK18_gp57	2.17992	0.00551771	0.012416
PRSS41	360226	2.17609	0.0141157	0.0285305
GOLGA8G	283768	2.17479	1.44705e-06	6.80342e-06
IL12A	3592	2.17347	1.39843e-17	3.04486e-16
SLC4A7	9497	2.16863	7.22573e-24	3.33781e-22
TLR4	7099	2.16687	1.96592e-21	6.97469e-20
K5	HHV8GK18_gp16	2.16466	0.00389494	0.00912371
ADAMDEC1	27299	2.16462	2.1774e-10	1.83213e-09
ZPBP2	124626	2.16419	0.00862428	0.0184765
LINC01847	101927766	2.16379	0.00615872	0.0136877
NCAN	1463	2.16254	0.00128983	0.00337819
FEV	54738	2.16243	0.0221111	0.0422916
NR5A2	2494	2.16131	4.39017e-21	1.49618e-19
TNIP3	79931	2.15941	7.1434e-14	9.72208e-13
TFEC	22797	2.15905	4.89234e-14	6.77233e-13
AKAP12	9590	2.15318	4.80382e-17	9.78831e-16
ERVV-2	100271846	2.15025	0.0371269	0.0666562
LINC02623	101929445	2.1482	8.53317e-06	3.47802e-05
MIR450A1	554214	2.14765	0.00934704	0.0198285
LINC03026	102724156	2.14669	5.73685e-08	3.39141e-07
KCNF1	3754	2.14609	1.45347e-07	8.06938e-07
MS4A7	58475	2.14497	2.47812e-12	2.73105e-11
SPTA1	6708	2.14265	1.3517e-08	8.78358e-08
MMP9	4318	2.13633	1.45823e-07	8.09222e-07
ITGA9	3680	2.13521	7.3597e-19	1.88756e-17
ISLR2	57611	2.13366	9.21731e-10	7.13573e-09
RGS7BP	401190	2.13349	2.51031e-09	1.82194e-08
SCML2	10389	2.13335	1.06335e-24	5.33442e-23
RPE65	6121	2.13074	5.59974e-09	3.8598e-08
LINC01558	26238	2.13031	3.73787e-13	4.56461e-12
NLRP11	204801	2.12919	0.0223294	0.0426603
FAM30A	9834	2.1285	2.93205e-05	0.000107411
KLK3	354	2.12771	0.0246115	0.046485
KCNK16	83795	2.12673	0.0119762	0.0246877
FSD1	79187	2.12637	3.33919e-08	2.04036e-07
ITGA1	3672	2.12397	1.22133e-14	1.82893e-13
TENM3	55714	2.12389	1.77613e-14	2.59771e-13
SLC2A3	6515	2.12141	1.31859e-20	4.24029e-19
SCN1A-AS1	101929680	2.12098	7.0517e-08	4.11631e-07
SLC4A10	57282	2.11928	1.84767e-05	7.03478e-05
STEAP1B-AS1	100506178	2.1167	5.32001e-13	6.36346e-12
BPIFB1	92747	2.11627	0.00559642	0.0125818
MMP16	4325	2.11213	7.42417e-14	1.0066e-12
ABCB5	340273	2.10949	5.13251e-05	0.000179752
RDH8	50700	2.10811	0.000129376	0.000419216
SIGLEC8	27181	2.10409	1.4831e-12	1.67873e-11
SPATA3	130560	2.10296	0.0146121	0.0294106
TRAT1	50852	2.10145	2.70297e-12	2.95935e-11
CD28	940	2.10039	1.36554e-14	2.02314e-13
POPDC3	64208	2.09983	1.37183e-12	1.55911e-11
MANCR	100216001	2.0981	2.76882e-07	1.47078e-06
PCDHB8	56128	2.09681	2.42811e-18	5.84495e-17
LINC00538	100861504	2.09526	0.000725803	0.00200654
GDF10	2662	2.09271	5.33011e-11	4.91888e-10
CCDC60	160777	2.09181	1.42613e-07	7.92985e-07
PCDHGA4	56111	2.09054	3.21827e-13	3.959e-12
H4C1	8359	2.09013	0.000906232	0.0024582
C4orf17	84103	2.08934	0.0318705	0.0582999
PRDM8	56978	2.08739	7.10146e-15	1.09616e-13
DPYD-AS1	100873932	2.0855	0.0027164	0.00660226
SULT1C3	442038	2.08256	0.0118991	0.0245447
SEC14L4	284904	2.0825	0.000112873	0.000369898
NCR3	259197	2.08243	0.00770769	0.016717
JCHAIN	3512	2.08201	2.72247e-06	1.21638e-05
CYP46A1	10858	2.08141	9.00515e-13	1.04524e-11
ADAMTS4	9507	2.08013	2.75026e-09	1.98175e-08
MYLK2	85366	2.07785	2.88653e-09	2.07399e-08
FAM126A	84668	2.07598	1.74966e-22	6.97722e-21
NLRP4	147945	2.07543	0.0222822	0.0425832
DPRX	503834	2.07529	5.73746e-05	0.000198994
LAYN	143903	2.07495	7.30831e-19	1.87822e-17
MZB1	51237	2.07291	2.34991e-05	8.7691e-05
ORF57	HHV8GK18_gp61	2.06869	0.00127709	0.00334901
CHRFAM7A	89832	2.06641	3.24689e-16	5.98836e-15
CCDC175	729665	2.06503	0.000183851	0.000577452
FCMR	9214	2.06384	3.42105e-18	8.08005e-17
ADAM19	8728	2.0587	1.20166e-16	2.33292e-15
ITLN1	55600	2.05589	1.28492e-05	5.06687e-05
PCSK1	5122	2.05429	1.23638e-05	4.88918e-05
ST8SIA4	7903	2.05012	7.51757e-19	1.92411e-17
GADL1	339896	2.0499	0.000269623	0.000817026
GAS2L3	283431	2.04889	2.25889e-19	6.17208e-18
SMOC1	64093	2.04839	1.77833e-14	2.5994e-13
PCDHB7	56129	2.04699	1.83396e-27	1.25003e-25
CYTL1	54360	2.04623	1.33751e-13	1.74009e-12
PAH	5053	2.04292	0.0143742	0.0289829
GPR137C	283554	2.03929	4.15668e-16	7.54428e-15
GPR85	54329	2.03903	1.01876e-18	2.56561e-17
PAEP	5047	2.03822	1.05137e-08	6.95082e-08
K4.1	HHV8GK18_gp15	2.03725	0.0165553	0.0327925
TRIML1	339976	2.03688	0.0415203	0.0735074
POU2AF1	5450	2.0338	5.99372e-06	2.51616e-05
CACNG5	27091	2.03178	0.0222275	0.0424852
LEPR	3953	2.03141	2.0376e-17	4.346e-16
DSCAM	1826	2.03137	0.00321898	0.00768675
AADACL4	343066	2.0304	0.0154869	0.0309429
EPHX4	253152	2.02389	2.40276e-18	5.78948e-17
RASGRP3	25780	2.02194	3.4654e-14	4.8943e-13
KCNA4	3739	2.02148	7.36297e-06	3.04209e-05
CEACAM21	90273	2.01916	9.40557e-16	1.62367e-14
PNLIPRP2	5408	2.01885	0.0199334	0.0386122
AGBL1	123624	2.01729	5.61279e-07	2.83842e-06
DENND2A	27147	2.01643	2.01714e-15	3.34186e-14
MYZAP	100820829	2.01629	5.11714e-22	1.94196e-20
PLPPR5	163404	2.0151	0.000688568	0.00191521
GBP5	115362	2.0133	3.45697e-15	5.56912e-14
ESM1	11082	2.01243	0.000489581	0.00140908
CFI	3426	2.01036	2.18198e-22	8.63257e-21
H4C5	8367	2.00828	0.000113256	0.000370957
ADGRF5	221395	2.00817	2.18966e-16	4.1389e-15
CMKLR2	2825	2.00702	1.09385e-13	1.438e-12
XAGE1B	653067	2.00552	0.0282494	0.0524601
GNAT3	346562	2.00505	0.000111447	0.00036551
JSRP1	126306	2.00497	1.41886e-05	5.54869e-05
CMBL	134147	2.00384	4.05096e-25	2.13467e-23
ORF37	HHV8GK18_gp41	2.00311	0.00152405	0.00391718
MAGED4B	81557	2.00307	3.75797e-18	8.82595e-17
LINC00563	100861554	2.00285	1.92091e-05	7.2904e-05
KBTBD11	9920	2.00277	9.35549e-17	1.84194e-15
ORF11	HHV8GK18_gp08	2.00262	0.00128258	0.00336103
SLC17A1	6568	1.99983	0.0318239	0.0582273
MIR3117	100422871	1.99951	7.75594e-06	3.19026e-05
RSPO2	340419	1.99947	0.00605059	0.0134856
ENPP7	339221	1.99746	0.00277125	0.00672517
QRFPR	84109	1.99683	0.00162275	0.00414833
CLEC6A	93978	1.99498	0.000165047	0.000523703
DNAJC5B	85479	1.99464	1.13312e-07	6.37554e-07
FPR2	2358	1.99456	3.08647e-10	2.54163e-09
HECW2-AS1	101927482	1.99308	4.29764e-15	6.81402e-14
ZPLD1	131368	1.99196	0.000109682	0.000360429
LCN1	3933	1.99146	0.000135486	0.000437318
LINC00309	150992	1.98749	0.0175721	0.0345508
RFX4	5992	1.98736	4.86267e-05	0.000170946
EBI3	10148	1.98681	6.30063e-16	1.11609e-14
TPO	7173	1.98558	1.61886e-10	1.38871e-09
H3C3	8352	1.98522	2.48476e-05	9.21834e-05
MS4A15	219995	1.98483	0.00172258	0.00437632
CLDN5	7122	1.98316	9.46794e-12	9.58371e-11
MIR3681HG	100506457	1.98294	3.30756e-06	1.4527e-05
LINC01163	101927381	1.98256	7.03737e-05	0.000239672
ORF6	HHV8GK18_gp03	1.98129	0.00217033	0.00539745
SYT16	83851	1.98055	0.00242717	0.00597339
ROPN1L	83853	1.97844	1.10349e-15	1.87908e-14
PCDH12	51294	1.97808	2.67634e-14	3.82729e-13
TMEFF1	8577	1.97748	1.83018e-06	8.44645e-06
K8.1	HHV8GK18_gp55	1.97436	0.000938419	0.00253482
NPY2R	4887	1.97292	0.00671136	0.0147784
ERFE	151176	1.97163	5.34586e-08	3.17825e-07
RIT2	6014	1.96885	0.0103803	0.0217572
LINC02432	100507639	1.9659	9.43954e-07	4.58505e-06
ENAM	10117	1.9655	0.00220675	0.00547984
IPCEF1	26034	1.96467	1.87129e-27	1.27165e-25
TMEM233	387890	1.96308	1.43367e-10	1.24216e-09
MAGED4	728239	1.9612	9.83363e-18	2.20229e-16
NFIA-AS2	100996570	1.95767	1.01167e-08	6.70427e-08
RGS17	26575	1.95759	3.75894e-16	6.87212e-15
SLC7A14	57709	1.95729	0.000444745	0.00129072
SV2A	9900	1.95577	3.67337e-20	1.10744e-18
MIR30C2	407032	1.95485	4.18979e-06	1.802e-05
NRIP1	8204	1.95296	1.22888e-26	7.48156e-25
MIP	4284	1.94953	1.31385e-06	6.22031e-06
TNFRSF4	7293	1.94842	1.57631e-13	2.02419e-12
H3C12	8356	1.94839	0.00023776	0.000729064
PRG4	10216	1.94823	0.000493752	0.00141979
MEF2C	4208	1.94801	3.24465e-22	1.26375e-20
OIT3	170392	1.94612	1.7868e-07	9.79209e-07
FCGR1A	2209	1.94401	3.51821e-12	3.78214e-11
CIB3	117286	1.94273	0.0193597	0.0376642
ORF32	HHV8GK18_gp36	1.94221	0.00579831	0.0129879
MIR130B	406920	1.94218	0.000439358	0.00127768
MIR646HG	284757	1.94212	7.62983e-07	3.76286e-06
TARID	100507308	1.94079	0.0133323	0.027111
FYB1	2533	1.94007	3.9564e-18	9.25731e-17
GNG2	54331	1.93833	6.21826e-25	3.18034e-23
ARHGAP18	93663	1.93823	2.51421e-28	1.84397e-26
C16orf89	146556	1.93782	2.88832e-12	3.15127e-11
STK32B	55351	1.93346	2.6561e-18	6.34503e-17
C16orf78	123970	1.93332	2.63703e-05	9.74003e-05
MSANTD3-TMEFF1	100526694	1.93227	0.00113037	0.00300002
MIR4514	100616181	1.93157	0.00176982	0.00448906
APLN	8862	1.93118	1.92516e-06	8.84571e-06
PTPRQ	374462	1.93104	0.000995622	0.00267465
HID1-AS1	102723641	1.92993	5.55768e-16	9.91545e-15
TNFRSF10C	8794	1.92988	7.03417e-24	3.26133e-22
NEUROG3	50674	1.92515	0.00382487	0.00897216
CREG2	200407	1.92434	1.36121e-06	6.42274e-06
HLA-DPB2	3116	1.92413	0.000340769	0.00101334
HSPA13	6782	1.92279	4.60692e-21	1.56579e-19
OR2B11	127623	1.92213	0.0148296	0.0297983
CDK5R2	8941	1.91998	0.0467026	0.0811697
CHSY3	337876	1.91955	4.63892e-15	7.33195e-14
C12orf40	283461	1.91864	0.008752	0.018715
GLT8D2	83468	1.91697	7.7514e-21	2.5718e-19
ORF25	HHV8GK18_gp29	1.91589	0.00776093	0.016815
FCAR	2204	1.91481	0.0458394	0.0798909
ZNF804B	219578	1.91454	0.0234187	0.0444975
SAMSN1	64092	1.91426	1.51708e-15	2.55389e-14
ANGPT2	285	1.91306	6.65191e-15	1.03185e-13
MIR6774	102466732	1.91258	0.000920649	0.00249249
LINC01146	283587	1.91249	0.000239986	0.00073544
CCL8	6355	1.91165	1.86013e-11	1.81618e-10
NR2F1-AS1	441094	1.91155	1.15152e-17	2.54482e-16
RBM24	221662	1.91143	7.69274e-08	4.4604e-07
LINC00636	285205	1.90833	2.61991e-09	1.89928e-08
PXDN	7837	1.90626	1.37526e-13	1.78457e-12
PTX3	5806	1.90576	3.73867e-06	1.62864e-05
IL24	11009	1.9052	4.32831e-09	3.02499e-08
FN1	2335	1.90447	9.49578e-14	1.25956e-12
RGS18	64407	1.90257	3.59011e-14	5.05052e-13
GABRB1	2560	1.90219	0.00420919	0.00977946
MIR4451	100616349	1.90216	0.0198335	0.0384573
MEP1A	4224	1.90179	0.000265054	0.000804884
CKLF-CMTM1	100529251	1.90013	0.00562936	0.0126511
DCHS2	54798	1.90002	9.06735e-08	5.1855e-07
MS4A4A	51338	1.89941	4.71588e-11	4.38268e-10
NID1	4811	1.8986	9.09965e-16	1.57411e-14
PTPRC	5788	1.89853	5.93555e-16	1.05365e-14
NEK10	152110	1.89852	2.95469e-11	2.81235e-10
GRAPL	400581	1.89786	5.6113e-11	5.16508e-10
RALYL	138046	1.89778	0.00994701	0.0209665
LINC01929	101927229	1.89735	2.16832e-05	8.14558e-05
NR2F1	7025	1.89698	3.97231e-15	6.33889e-14
ITGA4	3676	1.89661	8.89092e-15	1.3524e-13
CIBAR2	339145	1.89533	3.42325e-05	0.000123868
LINC02864	400655	1.89531	0.00334821	0.00797561
CES1P1	51716	1.8946	0.000156695	0.000499348
H4C6	8361	1.89215	0.00936093	0.0198563
CYP2A13	1553	1.88863	0.0247093	0.046653
CFAP97D2	101929355	1.88761	0.00503975	0.0114545
C5orf47	133491	1.88697	0.00321552	0.00767996
PHEX	5251	1.88677	8.01285e-15	1.22777e-13
CARD8-AS1	100505812	1.88621	1.08364e-26	6.6457e-25
TLR1	7096	1.88582	7.25247e-23	3.04713e-21
PIK3CG	5294	1.88362	2.63945e-21	9.20798e-20
CTSL3P	392360	1.88257	0.0120365	0.0248017
CCIN	881	1.88251	2.70798e-12	2.96354e-11
FLT4	2324	1.87723	1.31613e-10	1.14667e-09
TBXT	6862	1.87674	0.0134264	0.027278
INHBA	3624	1.87278	6.47879e-11	5.90696e-10
SNX10	29887	1.87109	7.60061e-20	2.20911e-18
DYRK3	8444	1.86976	8.09441e-21	2.67499e-19
CD200	4345	1.86799	4.97394e-17	1.01103e-15
ODF3L2	284451	1.86746	2.42121e-08	1.51223e-07
KDR	3791	1.86605	5.77171e-18	1.32575e-16
FCGR1CP	100132417	1.86434	2.88943e-10	2.39351e-09
ERG	2078	1.86329	1.36489e-22	5.5308e-21
DYSF	8291	1.86276	2.74838e-15	4.47938e-14
SH2D4B	387694	1.86237	3.76301e-13	4.58861e-12
GVINP1	387751	1.86209	4.81117e-17	9.79534e-16
PCDHGA5	56110	1.86015	3.49016e-14	4.92096e-13
STEAP1B	401312	1.85499	0.00103801	0.00277574
MPPED2	744	1.85483	2.63498e-17	5.5494e-16
ZEB1	6935	1.85443	1.6059e-21	5.77087e-20
AFAP1L1	134265	1.85408	3.11054e-17	6.50723e-16
OPCML	4978	1.85369	7.99728e-08	4.62096e-07
C4orf50	389197	1.85152	8.45122e-07	4.13543e-06
UCHL1	7345	1.8515	1.94852e-12	2.18288e-11
LRRC31	79782	1.85129	1.44423e-05	5.63648e-05
FAR2P4	440910	1.85017	0.0381536	0.0682651
SERPINA1	5265	1.84974	3.45203e-14	4.87816e-13
C3AR1	719	1.84829	2.17024e-15	3.58368e-14
KLRC2	3822	1.84823	1.92786e-08	1.22298e-07
MIR125B1	406911	1.84664	0.00551703	0.0124155
KLRC3	3823	1.84514	2.98842e-10	2.46899e-09
PRKCG	5582	1.8447	0.00254618	0.00623263
ZNF385D-AS1	100874216	1.84398	0.00136195	0.00354258
BCL6B	255877	1.84343	1.96181e-16	3.72224e-15
HOXD10	3236	1.84312	3.24951e-12	3.51477e-11
TMEM163	81615	1.84305	3.46093e-11	3.26723e-10
MIR3129	100422908	1.8425	0.0152286	0.0305047
RPA4	29935	1.84033	1.24537e-07	6.96647e-07
INHBB	3625	1.83933	8.10188e-16	1.41518e-14
RCSD1	92241	1.83805	1.17908e-21	4.29869e-20
SPSB4	92369	1.83717	1.19211e-08	7.81131e-08
LINC02037	101929337	1.8365	0.0242017	0.0458256
RIPOR3-AS1	100506175	1.83442	0.0147172	0.0295973
HAMP	57817	1.83336	2.50638e-08	1.56076e-07
MIR146A	406938	1.83304	2.41946e-07	1.2984e-06
RECK	8434	1.8309	1.7038e-23	7.5506e-22
VGLL2	245806	1.83082	0.00221375	0.00549559
KLHL5	51088	1.83041	6.68384e-27	4.21233e-25
KLF1	10661	1.83032	2.93931e-06	1.30698e-05
LY96	23643	1.82893	5.91704e-12	6.14309e-11
KLRC4	8302	1.82743	1.99165e-06	9.1345e-06
LRP2	4036	1.82626	0.000747909	0.0020631
H3C2	8358	1.8237	0.000824154	0.00225335
TMED7-TICAM2	100302736	1.82322	0.00136903	0.00355885
KNG1	3827	1.82287	0.00019668	0.000613445
ARGFX	503582	1.822	0.0205061	0.0395993
GRAP	10750	1.82087	2.47463e-13	3.08658e-12
LINC01484	101928136	1.82083	0.000127501	0.000413619
LGALS1	3956	1.82067	2.52712e-15	4.14841e-14
SCGB3A1	92304	1.81957	1.46314e-08	9.45146e-08
IL10	3586	1.81851	5.30983e-12	5.55406e-11
LCN8	138307	1.81639	0.03129	0.0573887
NRP2	8828	1.8162	3.81593e-17	7.89727e-16
ZNF208	7757	1.81463	1.43047e-11	1.41484e-10
ADD3	120	1.81434	8.729e-27	5.39284e-25
SULT1C4	27233	1.8125	2.39077e-12	2.64175e-11
MIR126	406913	1.81233	4.93195e-08	2.94754e-07
CAVIN2	8436	1.81164	1.53092e-21	5.51725e-20
LYN	4067	1.80751	4.62929e-26	2.66934e-24
PRKCQ	5588	1.80736	1.71736e-22	6.85931e-21
ETS1	2113	1.80686	1.89578e-21	6.74493e-20
PCDHGB2	56103	1.80636	4.97704e-15	7.83181e-14
FCRL5	83416	1.8055	0.00051809	0.00148111
TNXB	7148	1.80292	2.46785e-09	1.79528e-08
GDPD4	220032	1.80253	2.17151e-06	9.89067e-06
TRAPPC3L	100128327	1.80219	1.61357e-09	1.20313e-08
PDYN-AS1	727993	1.79999	0.00702741	0.0154014
CES1	1066	1.79917	0.000135975	0.000438669
FCGR1BP	2210	1.79893	8.4097e-12	8.58179e-11
LINC02539	100507406	1.79871	0.0161577	0.0321221
FPR1	2357	1.79842	3.29909e-08	2.01734e-07
DAB1	1600	1.79741	4.52419e-05	0.000160102
ACSM2A	123876	1.79677	2.80665e-06	1.25243e-05
CD180	4064	1.79531	1.3748e-10	1.19322e-09
IGLL5	100423062	1.7932	0.00208935	0.00521567
HSF5	124535	1.7912	1.77474e-06	8.21475e-06
GOLGA8EP	390535	1.79082	1.112e-05	4.43793e-05
ANKRD18DP	348840	1.79065	1.62265e-06	7.56804e-06
OR3A3	8392	1.78997	0.0217928	0.0417592
TNFSF11	8600	1.78976	1.11313e-08	7.32251e-08
PRSS33	260429	1.78966	0.0255103	0.0479415
CENPK	64105	1.78856	8.12112e-18	1.8335e-16
LINC02069	101928992	1.78426	0.015717	0.0313353
LAPTM5	7805	1.78399	7.28263e-20	2.12654e-18
LILRA1	11024	1.7817	3.04451e-08	1.87368e-07
GZMA	3001	1.78165	2.12123e-11	2.0575e-10
CD80	941	1.78128	1.1571e-13	1.51479e-12
ZFHX4	79776	1.78127	2.72539e-16	5.06353e-15
SYT11	23208	1.77971	3.95344e-25	2.09649e-23
FCER1G	2207	1.77864	1.62948e-10	1.39686e-09
APBA2	321	1.77809	1.3454e-17	2.9396e-16
CDH5	1003	1.77731	1.94617e-16	3.69536e-15
LY86-AS1	285780	1.77666	0.000691627	0.00192265
GNG11	2791	1.77602	1.51194e-13	1.94582e-12
P4HA3-AS1	101928580	1.77555	0.000167702	0.000531521
NME1-NME2	654364	1.77411	0.00286912	0.00693517
SYT4	6860	1.76983	0.0387846	0.0692755
COLEC12	81035	1.76916	4.15651e-16	7.54428e-15
LINC02212	101929412	1.76814	0.0465461	0.0809369
TIMD4	91937	1.76718	1.12396e-05	4.47925e-05
CACNG8	59283	1.76587	3.58958e-07	1.87188e-06
SLC39A14	23516	1.76568	2.30141e-24	1.12967e-22
TPH2	121278	1.76561	0.00588994	0.013172
P4HA3	283208	1.76485	6.78659e-08	3.97358e-07
ORF50	HHV8GK18_gp52	1.76293	8.59997e-05	0.000288386
MSR1	4481	1.76211	1.30901e-08	8.52386e-08
ITIH5	80760	1.76179	1.09484e-09	8.36999e-09
ORF18	HHV8GK18_gp22	1.76103	0.0357754	0.0645485
ALLC	55821	1.76029	0.000950638	0.00256479
ORF49	HHV8GK18_gp53	1.7602	0.000653134	0.00182719
LINC00888	100505687	1.75874	2.03326e-23	8.91613e-22
MARCO	8685	1.75791	0.000233015	0.000715914
ACSM4	341392	1.75782	2.13079e-12	2.37119e-11
KCNA3	3738	1.75741	4.41521e-10	3.56442e-09
SGCE	8910	1.75674	1.04981e-17	2.33857e-16
TFPI	7035	1.75606	1.89208e-14	2.75444e-13
NID2	22795	1.75575	2.9986e-12	3.26308e-11
FERMT2	10979	1.75553	2.68412e-20	8.27099e-19
THEMIS	387357	1.75484	3.11064e-08	1.91048e-07
MDS2	259283	1.75313	1.40002e-05	5.48239e-05
ADRA1B	147	1.75288	8.05198e-08	4.64935e-07
MORN5	254956	1.75257	0.0164618	0.0326386
GZMK	3003	1.75123	1.54108e-09	1.15319e-08
CYP8B1	1582	1.75098	1.65985e-08	1.06263e-07
SLCO1A2	6579	1.75088	0.0265409	0.0496587
MIR424	494336	1.74757	0.0259254	0.0486123
PRR18	285800	1.74754	7.91785e-05	0.000267407
RGSL1	353299	1.74698	0.0220093	0.0421163
MYCT1	80177	1.7461	5.09621e-15	8.01431e-14
CCL1	6346	1.74605	0.00021575	0.000667792
MYF6	4618	1.74596	0.0126625	0.0259149
CD69	969	1.7455	6.2204e-08	3.66603e-07
RAB39A	54734	1.74445	2.73156e-14	3.90181e-13
CD300LF	146722	1.74443	3.37883e-09	2.40429e-08
ADAMTS7	11173	1.74365	4.39931e-11	4.10967e-10
PCAT19	100505495	1.74364	8.66548e-15	1.31891e-13
SEL1L3	23231	1.74301	9.69822e-16	1.66882e-14
LINC00485	283432	1.7402	0.0438492	0.076984
LINC00839	84856	1.73818	1.2282e-16	2.3826e-15
RET	5979	1.73802	4.01305e-13	4.87927e-12
CHRM3-AS2	100506915	1.73757	1.75377e-05	6.70781e-05
BVES	11149	1.73629	1.42301e-19	3.98808e-18
VRTN	55237	1.73503	0.0247755	0.0467603
IGFBP5	3488	1.73499	7.40263e-11	6.67914e-10
KRTAP5-AS1	338651	1.7344	0.000933761	0.00252333
LINC02355	101927849	1.73377	0.0199956	0.0387178
CCT8L2	150160	1.73261	0.038544	0.0688995
GRASLND	386597	1.73032	2.01735e-12	2.25396e-11
LMOD3	56203	1.73004	3.07469e-06	1.36192e-05
GABRR2	2570	1.72966	3.55577e-12	3.8164e-11
RNVU1-6	101954276	1.72731	0.0317757	0.0581477
DPEP1	1800	1.7269	2.04799e-07	1.11142e-06
PCDHGB1	56104	1.72592	2.10414e-12	2.34257e-11
ACKR3	57007	1.7256	4.31723e-20	1.29069e-18
SNORD113-3	767563	1.7255	0.00734306	0.0160148
SNORD114-3	767579	1.72507	0.0134581	0.0273357
LRRTM2	26045	1.72321	1.09763e-15	1.87291e-14
DTHD1	401124	1.72176	1.82594e-07	9.98912e-07
LILRA5	353514	1.72089	2.81465e-07	1.49291e-06
CD79A	973	1.7205	0.000657513	0.00183841
MIR2355	100423036	1.71883	0.00188359	0.004745
SOX30	11063	1.71859	1.12643e-13	1.47773e-12
CCDC88A	55704	1.71757	2.54393e-23	1.10588e-21
ORF29	HHV8GK18_gp33	1.71606	0.00591558	0.0132235
PRL	5617	1.71586	0.0103529	0.0217088
CXCR4	7852	1.71295	7.42087e-08	4.31674e-07
LRCH2	57631	1.71257	1.62074e-14	2.38294e-13
PRKG1	5592	1.71242	1.03656e-15	1.77475e-14
OR7D2	162998	1.70996	0.00824033	0.0177312
ITGA9-AS1	101928153	1.70902	1.70399e-22	6.81677e-21
ZNF676	163223	1.70811	1.79742e-07	9.84383e-07
ACKR2	1238	1.70718	1.16547e-10	1.02179e-09
HTR1F	3355	1.70666	8.76663e-11	7.8226e-10
CYBB	1536	1.70657	2.87947e-13	3.5667e-12
PLCB1	23236	1.70637	1.32638e-20	4.25442e-19
PCDHB12	56124	1.7052	9.21904e-27	5.6816e-25
CREM	1390	1.70489	1.35319e-20	4.32933e-19
PCDH11X	27328	1.70416	0.00018318	0.00057556
ELAPOR2	222223	1.70366	5.4968e-21	1.84573e-19
SALL4	57167	1.70356	1.67278e-06	7.78157e-06
DNASE2B	58511	1.70209	0.00138587	0.00359854
LINC02201	101927379	1.70092	0.0194729	0.0378517
RNF133	168433	1.69992	2.15863e-05	8.11401e-05
APOLD1	81575	1.69888	7.93012e-16	1.38904e-14
ITGB1	3688	1.69876	4.71788e-24	2.23702e-22
COL4A1	1282	1.69868	1.45278e-09	1.09233e-08
LRRC2-AS1	83598	1.69787	0.0352593	0.063755
KBTBD11-AS1	101928058	1.69734	5.01115e-06	2.13042e-05
LIPC	3990	1.69729	8.19462e-12	8.37936e-11
PDE4B	5142	1.6965	6.22064e-21	2.07766e-19
TRIL	9865	1.69569	8.24116e-16	1.43551e-14
GYPC	2995	1.69455	9.42419e-17	1.85401e-15
LINC01224	104472717	1.6941	1.50658e-05	5.85429e-05
CD226	10666	1.69375	4.02985e-16	7.33001e-15
TBXA2R	6915	1.69279	4.44274e-11	4.14573e-10
ALPK3	57538	1.69252	2.83787e-11	2.70964e-10
TMEM82	388595	1.69231	0.000580193	0.00164014
PIK3AP1	118788	1.69215	3.16813e-18	7.51099e-17
IQSEC3	440073	1.69198	5.09068e-09	3.52887e-08
ZNF695	57116	1.69071	1.68936e-09	1.25591e-08
ABCD2	225	1.69019	7.92407e-08	4.58288e-07
CNTN5	53942	1.68944	0.0483896	0.0837362
CENPE	1062	1.68903	2.49407e-14	3.57478e-13
SLC8A1-AS1	100128590	1.68816	1.7689e-05	6.75949e-05
HOXD1	3231	1.68616	4.44615e-15	7.04503e-14
CCL3L1	414062	1.68561	9.31871e-05	0.00031025
LRRN4CL	221091	1.68494	2.25776e-17	4.77902e-16
ZNF729	100287226	1.68464	0.0010718	0.00285786
STARD6	147323	1.68449	5.17842e-05	0.000181234
RASGRF2	5924	1.68443	3.15076e-19	8.46152e-18
SLC40A1	30061	1.6823	3.39051e-10	2.77922e-09
DLL4	54567	1.68149	2.86594e-13	3.55345e-12
TNFSF12-TNFSF13	407977	1.68126	0.0249061	0.0469573
LINC01366	257358	1.67992	3.36052e-07	1.76011e-06
TREM1	54210	1.6793	5.16607e-06	2.19145e-05
SRARP	149563	1.67679	0.00805374	0.0173729
HMHB1	57824	1.67654	3.90435e-05	0.000139724
RPS6KA2-IT1	100874353	1.67649	5.93194e-09	4.07176e-08
ORF43	HHV8GK18_gp45	1.67614	0.0155913	0.0311244
SLC2A14	144195	1.67588	7.29435e-11	6.58856e-10
ARHGAP29	9411	1.67587	5.25028e-21	1.76769e-19
CAMK4	814	1.67578	5.42471e-14	7.45987e-13
ORF52	HHV8GK18_gp56	1.67548	0.0203095	0.0392469
MIR542	664617	1.67506	0.0338453	0.0614997
EYA1	2138	1.67478	2.34962e-05	8.7691e-05
LINC00923	91948	1.67345	0.00470714	0.0108033
RNF148	378925	1.67335	4.14613e-07	2.13811e-06
DOCK8	81704	1.67267	3.82536e-26	2.23663e-24
LAMA4	3910	1.67206	5.34756e-18	1.23511e-16
CAMK1G	57172	1.67174	1.11259e-06	5.32911e-06
CYRIA	81553	1.67167	2.63693e-22	1.03509e-20
TNFRSF13B	23495	1.67021	1.79097e-05	6.83445e-05
GUCY1A2	2977	1.66942	6.82788e-11	6.19847e-10
RAPGEF5	9771	1.66809	3.53445e-19	9.45145e-18
TLR7	51284	1.66803	1.09915e-09	8.40039e-09
RFLNB	359845	1.66742	1.9898e-27	1.33807e-25
CR1L	1379	1.667	5.11054e-08	3.04484e-07
NETO2	81831	1.66391	9.52933e-11	8.45804e-10
LINC01060	401164	1.66374	0.000207748	0.000644999
H4C3	8364	1.66336	0.00112005	0.00297483
PCDHGA3	56112	1.66321	5.92784e-16	1.05303e-14
FGF5	2250	1.66304	0.0075055	0.0163251
KLHL33	123103	1.66205	3.09438e-12	3.36147e-11
NKX6-3	157848	1.66117	0.0249033	0.0469556
SCIMP	388325	1.661	9.51316e-16	1.63999e-14
CETP	1071	1.66088	2.69958e-12	2.95822e-11
ETV1	2115	1.66017	4.43378e-19	1.17066e-17
LINC01624	401289	1.65973	0.000338054	0.00100598
SEPTIN11	55752	1.65928	2.32396e-20	7.20543e-19
TNIK	23043	1.65883	3.25218e-18	7.70298e-17
PCDHGB3	56102	1.65771	3.00735e-09	2.15155e-08
SNORD3D	780854	1.65625	0.0385613	0.0689255
H4C13	8368	1.6535	0.0108532	0.0226368
PRRG1	5638	1.65183	9.87021e-23	4.08539e-21
PCDHGA1	56114	1.65133	1.31165e-10	1.14355e-09
LILRB2	10288	1.6482	1.0255e-08	6.78877e-08
H1-5	3009	1.64808	0.00616387	0.0136979
NCAM1	4684	1.64715	8.16625e-09	5.48859e-08
ERC2	26059	1.64694	5.92941e-12	6.15339e-11
MIRLET7C	406885	1.64581	0.00285815	0.00691172
IL21-AS1	100996941	1.6458	0.00186825	0.00470967
ICOS	29851	1.64497	4.1535e-10	3.36723e-09
TIE1	7075	1.64423	1.71156e-13	2.18812e-12
C5orf52	100190949	1.6439	0.0122827	0.025249
PRR29-AS1	400612	1.64322	2.2144e-11	2.14455e-10
UBD	10537	1.64213	2.17408e-09	1.58987e-08
NAALAD2	10003	1.64062	9.03504e-17	1.78305e-15
LYZ	4069	1.64061	6.22141e-10	4.93366e-09
SPOCD1	90853	1.64034	9.51064e-07	4.6169e-06
UGT2B17	7367	1.63983	0.0301224	0.0555142
UNC80	285175	1.63553	1.64279e-08	1.0526e-07
MCAM	4162	1.63433	1.2126e-13	1.58251e-12
DHRS7C	201140	1.63415	0.0322211	0.058881
SUCNR1	56670	1.63398	5.03795e-08	3.00588e-07
ZSCAN10	84891	1.63385	6.53692e-05	0.000224027
ORF42	HHV8GK18_gp46	1.63361	0.0114292	0.0236806
DLGAP5	9787	1.63321	1.97856e-13	2.50901e-12
ADGRL4	64123	1.63198	4.71902e-14	6.54324e-13
CFL2	1073	1.63122	7.72672e-18	1.7476e-16
DOCK4	9732	1.63093	3.40146e-23	1.46596e-21
HTR3E	285242	1.6286	0.00867998	0.0185784
CSTF3-DT	338739	1.62841	2.51426e-05	9.32089e-05
RTN1	6252	1.6266	1.00011e-17	2.23382e-16
GPRC5B	51704	1.62581	2.2841e-17	4.83071e-16
K6	HHV8GK18_gp17	1.62452	0.0408067	0.0724121
DLGAP3	58512	1.6234	3.78966e-12	4.05183e-11
CALCR	799	1.62312	4.40605e-06	1.89047e-05
H3C1	8350	1.62218	0.000210735	0.000653383
FGL2	10875	1.62167	8.52581e-16	1.48098e-14
FEZ1	9638	1.62095	6.20158e-22	2.33916e-20
BTG4	54766	1.62094	0.00914092	0.0194521
MIR186	406962	1.62058	1.00533e-06	4.85312e-06
MIR4420	100616164	1.62045	0.00024071	0.000737298
BVES-AS1	154442	1.62013	1.33946e-11	1.3285e-10
CD163L1	283316	1.61928	5.0377e-12	5.28706e-11
ABHD14A-ACY1	100526760	1.61925	0.0442582	0.0775933
PKD1L3	342372	1.61755	2.36192e-15	3.88995e-14
SHD	56961	1.61688	0.00171565	0.00436093
TBC1D9	23158	1.61556	1.64124e-23	7.29914e-22
DPEP2NB	100131303	1.61278	0.00822909	0.01771
S1PR1	1901	1.61256	1.72221e-17	3.70164e-16
GPR65	8477	1.61163	1.98657e-12	2.22253e-11
SMAD1-AS2	101927659	1.6109	9.70316e-05	0.000321937
NLRP14	338323	1.61071	0.00133211	0.00347332
P2RX5	5026	1.6091	8.23362e-08	4.74768e-07
ANKRD40CL	55018	1.60849	0.0481438	0.0833971
SGIP1	84251	1.60837	2.72854e-10	2.26623e-09
IL5RA	3568	1.6083	1.82339e-05	6.94971e-05
SORCS1	114815	1.60815	1.29366e-09	9.80623e-09
PPP1R16B	26051	1.60742	4.97228e-16	8.9662e-15
SOCS3-DT	101928674	1.6068	1.33325e-08	8.67267e-08
SCARNA18	677765	1.60664	0.0210523	0.0405261
CDYL2	124359	1.60506	2.24309e-25	1.22312e-23
KIF14	9928	1.6049	1.76922e-11	1.73079e-10
TRPM5	29850	1.60455	0.000118908	0.00038775
CORO6	84940	1.60443	2.91576e-09	2.09319e-08
ADGRE2	30817	1.60435	5.00979e-23	2.12984e-21
SLITRK4	139065	1.60328	4.18906e-06	1.80199e-05
ORF65	HHV8GK18_gp76	1.60326	0.00523092	0.0118333
RNF182	221687	1.60321	6.71377e-10	5.30065e-09
HS6ST3	266722	1.60237	0.00257645	0.00629752
CR2	1380	1.60205	0.000705552	0.00195746
ITGAD	3681	1.60176	1.91122e-07	1.04261e-06
IGF2BP1	10642	1.60151	0.010555	0.0220847
TOX2	84969	1.60027	1.29914e-13	1.69104e-12
LAX1	54900	1.5986	4.02646e-07	2.08153e-06
LILRB4	11006	1.59641	1.1078e-09	8.45618e-09
ST6GALNAC3	256435	1.59501	3.84673e-16	7.01217e-15
LRRC70	100130733	1.59483	8.29833e-14	1.1113e-12
FER1L6-AS2	157376	1.59441	0.0264391	0.0494868
PRSS55	203074	1.59433	0.034482	0.0625253
MERTK	10461	1.59398	1.08505e-16	2.118e-15
CHST7	56548	1.59259	2.71305e-15	4.43043e-14
PRSS57	400668	1.59251	0.00737791	0.016082
H2BC10	8346	1.59038	0.00259037	0.00632845
ORF39	HHV8GK18_gp43	1.58987	0.0193862	0.0377096
ABCC9	10060	1.58973	2.87724e-13	3.5657e-12
TSPAN18	90139	1.5883	5.33812e-15	8.37897e-14
GFRAL	389400	1.58774	0.0406863	0.0722466
LINC00703	100507059	1.58681	0.0449842	0.0786463
PCTP	58488	1.58648	1.12911e-26	6.90769e-25
CALU	813	1.58594	8.86211e-20	2.54334e-18
SGO2	151246	1.5859	4.71807e-17	9.62924e-16
SGTB	54557	1.58553	2.40347e-25	1.30208e-23
PHACTR2	9749	1.58535	1.56854e-20	4.99286e-19
DOCK4-AS1	100506413	1.58469	0.000120766	0.000393603
LGMN	5641	1.58447	2.65106e-15	4.33767e-14
MYO7A	4647	1.58421	2.39697e-13	3.00165e-12
WSCD1	23302	1.58361	5.49808e-11	5.06457e-10
MIR4477B	100616194	1.58303	1.01153e-06	4.8802e-06
TAFA5	25817	1.58188	1.89079e-10	1.60869e-09
PPFIA2-AS1	102724663	1.58109	0.00110056	0.00293019
MRO	83876	1.58077	6.24005e-08	3.67588e-07
ANKRD60	140731	1.57847	0.041326	0.0732204
TRPM8	79054	1.57844	0.000541327	0.00154139
MYH7	4625	1.57722	0.00609232	0.0135629
CXXC4	80319	1.57591	1.03098e-10	9.1057e-10
FGF20	26281	1.57457	0.0352622	0.0637557
CDH10	1008	1.57415	0.00615718	0.0136855
F8	2157	1.57304	6.39491e-14	8.73658e-13
NCEH1	57552	1.57295	1.13082e-22	4.61208e-21
KLRB1	3820	1.57219	2.97654e-09	2.13194e-08
GABRD	2563	1.57172	3.4709e-07	1.81301e-06
LMO2	4005	1.57125	3.87403e-20	1.16654e-18
MCTP1	79772	1.57093	1.03133e-16	2.02258e-15
RANBP3L	202151	1.57007	1.67383e-06	7.78505e-06
CLEC9A	283420	1.5698	3.72031e-09	2.62864e-08
RECQL	5965	1.56672	1.03638e-17	2.31072e-16
LHCGR	3973	1.56597	0.00183801	0.00464511
CACNA1E	777	1.56427	3.53247e-06	1.54496e-05
PCDHGA2	56113	1.56391	7.00802e-11	6.34822e-10
CXCL3	2921	1.5613	0.00119662	0.00315745
GALNT4	8693	1.56109	4.00088e-06	1.72994e-05
MIR99A	407055	1.5608	0.0356708	0.0643784
CLIC2	1193	1.56065	3.78651e-15	6.07269e-14
TNFAIP6	7130	1.56004	3.03952e-07	1.60405e-06
PTX4	390667	1.55973	0.000188406	0.000590061
K8	HHV8GK18_gp54	1.55963	0.022505	0.0429664
TMEM30A	55754	1.55797	1.58559e-12	1.79069e-11
PLOD2	5352	1.55729	4.50608e-14	6.27574e-13
LINC01729	101929207	1.55727	0.0260433	0.0488115
SCARNA3	677679	1.55643	0.00381508	0.00895205
SPINK8	646424	1.55514	0.0417362	0.073822
GIPC3	126326	1.55376	5.78323e-12	6.01911e-11
ASAP1-IT2	100507117	1.55365	0.000123457	0.000401696
GASK1B	51313	1.55361	6.77388e-13	8.01081e-12
TMEM244	253582	1.55318	0.000978684	0.00263366
NOVA2	4858	1.55305	3.03722e-13	3.75283e-12
GNG7	2788	1.55291	1.27232e-14	1.89962e-13
EMID1	129080	1.55282	2.83316e-11	2.70618e-10
LIPI	149998	1.55278	0.000164854	0.000523158
RNVU1-15	101954267	1.55258	0.00840153	0.0180378
DIPK2B	79742	1.55027	8.14498e-17	1.6163e-15
ECSCR	641700	1.55004	1.81551e-15	3.0198e-14
GRM8	2918	1.54921	0.00127283	0.00333889
VLDLR	7436	1.54823	3.24474e-20	9.85323e-19
CCL4	6351	1.54798	8.94185e-09	5.9667e-08
IL32	9235	1.54759	8.5655e-12	8.72304e-11
CTHRC1	115908	1.54695	1.1365e-11	1.13982e-10
DDX4	54514	1.54604	0.0434074	0.0763152
KCNMA1-AS1	101929328	1.5455	0.0135603	0.0275166
MIR4496	100616240	1.54487	0.0264118	0.0494394
KCNE3	10008	1.54481	3.4974e-12	3.7618e-11
BHLHA15	168620	1.54445	1.21825e-05	4.82512e-05
HECW2	57520	1.54443	7.98996e-17	1.58679e-15
ORF8	HHV8GK18_gp05	1.54318	0.0229139	0.0436408
ORF45	HHV8GK18_gp51	1.542	0.00471852	0.0108264
PCSK6	5046	1.5418	1.09181e-16	2.12955e-15
ZNF281	23528	1.5411	8.61807e-20	2.48183e-18
FAM78A	286336	1.54109	8.51509e-17	1.68708e-15
P2RY8	286530	1.5407	1.12736e-11	1.13155e-10
TRIM9	114088	1.54059	5.63203e-09	3.88073e-08
SELENOP	6414	1.53995	4.81405e-13	5.79696e-12
CD3G	917	1.53936	8.60495e-11	7.69476e-10
ATCAY	85300	1.53883	0.0394278	0.0702941
MFAP3	4238	1.53861	2.20546e-19	6.03924e-18
DDO	8528	1.53843	2.08582e-17	4.44131e-16
FBN1	2200	1.53831	3.18881e-10	2.62246e-09
CD163	9332	1.53741	1.83527e-08	1.16779e-07
KIT	3815	1.53736	2.85376e-17	5.98503e-16
FXYD2	486	1.53722	1.1565e-07	6.49831e-07
SLC5A4	6527	1.53705	4.57434e-10	3.68341e-09
RFPL4B	442247	1.53695	0.0122393	0.025174
DPYSL3	1809	1.53657	3.06049e-19	8.24556e-18
ITM2C	81618	1.53587	7.41407e-12	7.62472e-11
FSHR	2492	1.53586	0.0218473	0.0418381
KCNQ1	3784	1.53392	1.842e-13	2.34533e-12
ORF33	HHV8GK18_gp37	1.53241	0.0353715	0.0639303
PTPRG	5793	1.53151	1.04694e-20	3.39722e-19
HSPA12B	116835	1.52964	4.06945e-12	4.33251e-11
RXFP1	59350	1.52963	1.54584e-05	5.99294e-05
ERICH2-DT	101926913	1.52941	0.0223028	0.0426161
GBP7	388646	1.52853	7.80193e-07	3.83793e-06
CTRB1	1504	1.52815	0.013901	0.028142
LILRA2	11027	1.52776	7.16467e-06	2.96651e-05
CCNE2	9134	1.52773	3.27703e-15	5.29624e-14
LINC01704	646268	1.52666	0.0015046	0.00387154
BRCA2	675	1.52639	1.86432e-13	2.37013e-12
TSPAN12	23554	1.52606	7.21392e-12	7.42802e-11
GPR78	27201	1.52453	0.0218298	0.0418114
C18orf54	162681	1.52285	1.00584e-20	3.26807e-19
CRTAM	56253	1.52265	2.13495e-08	1.34584e-07
LINC01031	101929184	1.52265	0.00977692	0.0206461
PRR11	55771	1.52093	3.57582e-20	1.08193e-18
NPNT	255743	1.52055	8.74277e-13	1.01808e-11
DAB2	1601	1.52	2.70908e-14	3.8719e-13
METTL4	64863	1.5197	1.02498e-21	3.762e-20
CCR1	1230	1.51936	3.69707e-09	2.6159e-08
KLRK1	22914	1.51931	2.47166e-05	9.17925e-05
F13A1	2162	1.5192	8.50071e-10	6.6239e-09
CD84	8832	1.51839	4.56143e-12	4.81948e-11
ETS1-AS1	101929517	1.51838	6.10885e-05	0.000210565
H19	283120	1.5176	3.45865e-06	1.51402e-05
STARD4-AS1	100505678	1.51747	1.09891e-08	7.23843e-08
PCDHGA12	26025	1.51715	7.1111e-09	4.83036e-08
SHCBP1L	81626	1.51688	0.00204905	0.00512477
FIGNL2	401720	1.51627	4.73973e-12	4.98686e-11
PTCRA	171558	1.51576	3.71192e-08	2.25493e-07
PRAC2	360205	1.51559	0.0197133	0.0382478
FER1L6	654463	1.51423	0.000461315	0.001334
PREX2	80243	1.51196	6.57095e-10	5.19606e-09
JCAD	57608	1.51192	1.78044e-16	3.39353e-15
APOC1	341	1.51176	1.78892e-06	8.26868e-06
CCDC83	220047	1.51169	0.00662384	0.0146126
C1orf167	284498	1.51068	0.000180034	0.000566812
LINC01993	100996291	1.50922	0.000839894	0.00229065
LIPA	3988	1.50819	8.11804e-14	1.0889e-12
LINC00578	100505566	1.50781	3.68472e-06	1.6075e-05
CEACAM20	125931	1.50751	0.0122059	0.0251074
FBXO40	51725	1.50677	4.57896e-05	0.000161766
TMC1	117531	1.50644	2.42637e-11	2.3372e-10
SRGN	5552	1.50571	5.80443e-12	6.03617e-11
CEP170	645455	1.50523	2.36017e-17	4.98318e-16
CHST6	4166	1.50501	6.65901e-09	4.53388e-08
GPR34	2857	1.5045	8.86104e-09	5.92066e-08
MAPK10-AS1	101929064	1.50402	0.0278039	0.0517592
TMEM252	169693	1.5039	1.66794e-08	1.06645e-07
HDAC9	9734	1.50383	7.43067e-15	1.14416e-13
TMEM171	134285	1.50326	6.81936e-09	4.63802e-08
OVCH1	341350	1.5016	0.000194303	0.000607164
SIX1	6495	1.50141	7.17758e-07	3.55801e-06
CD36	948	1.50071	2.512e-07	1.34519e-06
PLAC1	10761	1.5007	0.0025961	0.00634122
TBX1	6899	1.50061	3.79269e-10	3.0857e-09
SCAMP5	192683	1.49921	5.11937e-10	4.09729e-09
RELN	5649	1.49911	1.72651e-05	6.61463e-05
TSPAN15	23555	1.49724	5.92781e-15	9.26978e-14
PCDH10	57575	1.49392	3.50899e-05	0.000126843
LRRC52-AS1	400794	1.4936	0.0337738	0.0613741
PTP4A3	11156	1.4936	4.48928e-11	4.18449e-10
HOXB8	3218	1.49359	2.35871e-07	1.26824e-06
ORF4	HHV8GK18_gp02	1.49268	0.0430369	0.0757771
HOXD8	3234	1.4922	3.98476e-24	1.9038e-22
LCP2	3937	1.49158	2.38792e-18	5.75924e-17
NECTIN3	25945	1.49064	1.94446e-14	2.82578e-13
ZBBX	79740	1.49049	0.032864	0.0599075
MS4A6A	64231	1.49044	5.2582e-10	4.20304e-09
DNAH14	127602	1.49019	9.53956e-16	1.64341e-14
CRYBA4	1413	1.48851	0.000616259	0.00173447
MAN1A1	4121	1.48683	2.56107e-14	3.66454e-13
P2RY12	64805	1.48601	5.65751e-08	3.34845e-07
FSCN1	6624	1.48576	9.91418e-18	2.21638e-16
ADAM9	8754	1.48491	4.84006e-18	1.12203e-16
RNVU1-14	101954266	1.48486	0.00605196	0.0134874
SERPINB9	5272	1.48469	4.71377e-18	1.09579e-16
FSIP1	161835	1.48318	1.15596e-11	1.15794e-10
GIMAP4	55303	1.48149	3.05965e-20	9.33641e-19
PLEK	5341	1.48145	1.77416e-13	2.26469e-12
SIGLEC7	27036	1.48096	2.58829e-06	1.16139e-05
SOCS3	9021	1.47942	1.05559e-06	5.07522e-06
CXXC1P1	392459	1.47916	0.0215049	0.0412927
PSMA8	143471	1.47902	0.00227152	0.0056262
MIR6132	102466616	1.47866	3.6085e-06	1.57604e-05
AOAH	313	1.47841	1.11924e-10	9.83667e-10
CD93	22918	1.47815	1.78707e-13	2.2777e-12
DLL3	10683	1.47635	0.00117827	0.00311331
HOXB5	3215	1.47583	4.59122e-09	3.19538e-08
RASD1	51655	1.47582	1.21761e-11	1.21533e-10
TREML4	285852	1.47578	0.000566309	0.00160397
TYMS	7298	1.47529	4.84049e-15	7.63611e-14
COL4A2	1284	1.47386	1.06654e-08	7.04187e-08
LRRC74A	145497	1.47266	7.86159e-06	3.22895e-05
MMP17	4326	1.47188	1.08488e-09	8.29966e-09
BHMT2	23743	1.47114	6.8283e-08	3.9952e-07
UBE2J1	51465	1.47083	7.56227e-20	2.20052e-18
BRDT	676	1.47065	0.0185452	0.0362619
SIGLEC10	89790	1.46975	1.50445e-11	1.48509e-10
CHST15	51363	1.46964	7.59177e-18	1.72018e-16
ELK3	2004	1.46906	2.96766e-18	7.05571e-17
FRG2C	100288801	1.46625	0.000500947	0.00143817
BICD1	636	1.46557	3.62253e-21	1.24642e-19
CCDC102B	79839	1.46484	4.71845e-09	3.28211e-08
SLAMF6	114836	1.46299	4.3312e-09	3.02617e-08
PLAUR	5329	1.46231	5.43255e-16	9.72624e-15
CYP26C1	340665	1.46187	6.34838e-05	0.000218192
CEACAM1	634	1.46076	4.00795e-14	5.61001e-13
ROBO4	54538	1.46	8.18263e-13	9.59537e-12
LETR1	400456	1.45979	1.70423e-12	1.91949e-11
MIR133A1HG	102723167	1.45895	0.00250519	0.0061437
ITGA5	3678	1.45797	1.31045e-17	2.86823e-16
BTBD8	284697	1.45694	8.44575e-10	6.58516e-09
ARHGAP6	395	1.4568	1.13104e-15	1.92338e-14
STARD3NL	83930	1.45644	1.32184e-20	4.2453e-19
KCNN3	3782	1.45602	8.03329e-09	5.40067e-08
HLA-DQA1	3117	1.4552	0.00013775	0.000443939
OTOAP1	653786	1.4548	7.54614e-05	0.000255818
IKBIP	121457	1.45436	1.25361e-15	2.12892e-14
FYB2	199920	1.45413	0.0348247	0.06306
RADIL	55698	1.45333	3.44635e-07	1.80131e-06
SLC2A13	114134	1.45292	1.48633e-18	3.66224e-17
UTS2R	2837	1.45241	0.0040041	0.00934887
DMXL2	23312	1.45216	1.57905e-18	3.87925e-17
ZFPM2	23414	1.45176	9.47492e-18	2.12766e-16
FIGNL2-DT	105369971	1.45112	2.1886e-07	1.18185e-06
IGSF6	10261	1.45093	1.86349e-11	1.81876e-10
GOLGA8DP	100132979	1.4501	0.00187761	0.00473139
CALHM6	441168	1.44919	2.41433e-09	1.75838e-08
CEP85L	387119	1.44771	1.66999e-20	5.27561e-19
SACS	26278	1.44745	1.54767e-19	4.31336e-18
EOMES	8320	1.44687	6.19845e-08	3.65395e-07
SIGLEC6	946	1.44658	2.651e-06	1.18635e-05
DCAF4L2	138009	1.44656	0.0223588	0.0427036
KCNIP1	30820	1.44653	7.22151e-08	4.21106e-07
GLDC	2731	1.44653	5.4688e-05	0.000190599
SPAAR	158376	1.44559	8.04869e-10	6.29318e-09
GMFG	9535	1.44538	1.25955e-12	1.43868e-11
EPOR	2057	1.44438	3.26318e-16	6.01399e-15
WIPF1	7456	1.44433	2.46186e-19	6.69749e-18
RGS16	6004	1.44407	4.79393e-09	3.33184e-08
GAP43	2596	1.4433	1.07841e-05	4.31723e-05
SLC39A12	221074	1.44139	0.000904389	0.00245395
IL7R	3575	1.44134	5.78563e-08	3.41944e-07
FNDC3B	64778	1.441	4.31381e-22	1.65448e-20
MAP4K4	9448	1.4395	1.41274e-24	7.00312e-23
NALF1	728215	1.4395	8.95894e-07	4.36768e-06
C1QB	713	1.43898	7.65077e-07	3.77245e-06
PTPRB	5787	1.43881	1.48929e-17	3.23426e-16
SHE	126669	1.43861	3.19629e-20	9.71789e-19
MOBP	4336	1.43821	2.85351e-05	0.000104748
MYH4	4622	1.43625	0.0200305	0.0387734
PRUNE2	158471	1.43617	9.15521e-15	1.39091e-13
SH2D1A	4068	1.4359	6.14648e-07	3.08653e-06
LIMS1	3987	1.43565	9.30254e-22	3.43646e-20
LAMP5-AS1	101929329	1.43561	0.0240673	0.0456004
RHAG	6005	1.43498	0.000565495	0.0016022
RGS9	8787	1.4344	2.49934e-12	2.75081e-11
CHST4	10164	1.4332	0.0158467	0.0315614
NPHS1	4868	1.43307	0.0309079	0.0567834
NT5E	4907	1.43299	2.70763e-08	1.67444e-07
KMO	8564	1.43248	4.76195e-10	3.8271e-09
SLC17A3	10786	1.43247	0.0217858	0.041749
SMIM43	132332	1.43237	0.000169038	0.000535014
ALDH1A1	216	1.43112	2.7787e-09	2.00052e-08
DRAM1	55332	1.43056	1.08572e-17	2.41216e-16
LRRC25	126364	1.43041	4.12763e-10	3.34735e-09
VCAN-AS1	105379054	1.42968	1.48786e-05	5.78694e-05
GPR22	2845	1.42909	0.00950312	0.0201204
MIR3945HG	731424	1.42841	0.000150171	0.00048033
THEMIS2	9473	1.42834	9.03724e-14	1.20319e-12
CCDC80	151887	1.42795	4.26661e-07	2.19617e-06
DCHS1	8642	1.42751	5.71496e-13	6.81313e-12
CREB5	9586	1.42659	2.43795e-18	5.86299e-17
CEMIP2	23670	1.42597	5.83874e-14	8.00728e-13
EPB41L2	2037	1.42564	9.95306e-19	2.5116e-17
LINC02774	339529	1.4245	0.0164329	0.0325967
ANKRD6	22881	1.42417	1.45688e-24	7.2077e-23
CSGALNACT1	55790	1.42311	1.93994e-16	3.68632e-15
OLFM1	10439	1.42235	2.28082e-10	1.91465e-09
HHIPL1	84439	1.42219	3.13317e-14	4.45013e-13
LINC01117	102724224	1.42062	3.7858e-10	3.08109e-09
TRPA1	8989	1.42057	1.99016e-05	7.53837e-05
FAT4	79633	1.42023	5.08661e-14	7.02574e-13
ANTXR2	118429	1.41972	1.33714e-20	4.28346e-19
FZD4	8322	1.41743	1.08958e-15	1.86247e-14
ZNF702P	79986	1.417	1.58051e-15	2.65711e-14
DAPK1	1612	1.41442	9.30043e-22	3.43646e-20
PRR29	92340	1.41421	3.25331e-12	3.51736e-11
MPEG1	219972	1.41356	9.26255e-13	1.07412e-11
MIR4435-2HG	541471	1.41337	6.8427e-10	5.39904e-09
PCLO	27445	1.41334	8.01662e-13	9.40509e-12
SLC45A3	85414	1.41334	5.71518e-18	1.31517e-16
PYHIN1	149628	1.41323	2.26875e-08	1.42339e-07
SLC19A1	6573	1.41273	4.39135e-12	4.65525e-11
CDKN3	1033	1.41242	1.85549e-11	1.81236e-10
C3orf80	401097	1.41118	2.19904e-07	1.18722e-06
PCDHB15	56121	1.41101	3.80188e-15	6.08567e-14
CFAP65	255101	1.41084	0.0245993	0.0464732
STARD4	134429	1.41003	7.66112e-12	7.85946e-11
PTPRE	5791	1.40969	2.318e-22	9.14566e-21
BCHE	590	1.40856	5.48713e-12	5.72996e-11
PODXL	5420	1.40813	8.76212e-14	1.16967e-12
KLHL23	151230	1.40584	5.88811e-05	0.0002036
SLC4A4	8671	1.40498	7.09645e-07	3.51988e-06
ITGB3	3690	1.4047	2.91063e-11	2.77384e-10
DERL3	91319	1.40403	1.14632e-05	4.56326e-05
PGF	5228	1.40301	4.04383e-12	4.31073e-11
PTH2R	5746	1.40278	0.00127144	0.00333629
LINC00877	285286	1.40246	1.76598e-09	1.3086e-08
OR51B4	79339	1.40097	0.0334797	0.0608751
SPRY3	10251	1.40034	3.33914e-24	1.61691e-22
KHDRBS2	202559	1.39861	0.00904967	0.0192737
CLEC12A	160364	1.3978	7.9938e-07	3.92692e-06
TRPC4	7223	1.39659	2.97655e-06	1.32156e-05
LINC00528	200298	1.39601	2.54098e-11	2.4401e-10
UBE2E1-AS1	100874092	1.39593	1.79929e-05	6.8641e-05
CYTOR	112597	1.3957	2.32368e-10	1.94933e-09
PKN2-AS1	101927891	1.39527	5.51539e-09	3.80375e-08
CATSPERD	257062	1.39477	0.0217634	0.0417156
DLGAP1	9229	1.39457	1.01971e-05	4.10486e-05
SCRN1	9805	1.39447	5.85365e-23	2.47601e-21
PDE6G	5148	1.39418	2.33516e-07	1.25612e-06
SLC7A7	9056	1.39386	1.63569e-15	2.74294e-14
ELMO1	9844	1.39381	1.84061e-23	8.11388e-22
COL12A1	1303	1.39373	2.43454e-08	1.51942e-07
SEMA6A	57556	1.39297	2.25669e-20	7.00553e-19
KLHL3	26249	1.39258	1.2635e-17	2.7703e-16
CTSS	1520	1.3925	4.58026e-12	4.8353e-11
PECAM1	5175	1.39121	8.8391e-18	1.98844e-16
PITX3	5309	1.39038	8.57773e-06	3.49505e-05
SMIM24	284422	1.38984	0.0104449	0.0218725
SULF1	23213	1.38973	3.28556e-07	1.72337e-06
TEK	7010	1.38939	7.58622e-14	1.02635e-12
C1QC	714	1.38919	1.37634e-06	6.49047e-06
KLRG1	10219	1.38873	2.44048e-08	1.52275e-07
SNURF	8926	1.38858	0.025819	0.0484473
MYL4	4635	1.3884	2.78732e-10	2.31275e-09
MILR1	284021	1.38798	1.09351e-08	7.20857e-08
MIR4477A	100616184	1.3877	1.41778e-07	7.88518e-07
IGF2	3481	1.38759	0.00109782	0.00292351
GRM1	2911	1.38752	6.61648e-06	2.75683e-05
LINC01913	388942	1.38752	0.0353951	0.0639637
CD14	929	1.38705	9.87617e-10	7.60356e-09
ORF10	HHV8GK18_gp07	1.38658	0.0178532	0.03504
TMOD2	29767	1.38614	4.56718e-17	9.3441e-16
GOLGA6L7	728310	1.386	0.00142019	0.00367887
MYH8	4626	1.38581	0.00411438	0.00958316
CD34	947	1.38532	1.16058e-12	1.3323e-11
ROS1	6098	1.38522	0.0210997	0.0405955
MAP1B	4131	1.38474	1.61404e-23	7.19094e-22
ORF9	HHV8GK18_gp06	1.38443	0.0152643	0.0305566
MIR3667HG	348645	1.38437	1.52292e-08	9.8199e-08
SFMBT2	57713	1.38366	4.40434e-16	7.97071e-15
GRPEL2	134266	1.38298	5.32717e-22	2.01845e-20
MYO1B	4430	1.38297	2.30091e-14	3.31307e-13
PDE1A	5136	1.38216	1.66516e-09	1.23938e-08
NUGGC	389643	1.38121	7.79317e-06	3.204e-05
DEPDC1-AS1	101927220	1.38015	0.0492312	0.0850167
MEI1	150365	1.37992	4.40633e-09	3.07523e-08
RAB43	339122	1.37923	2.90853e-10	2.40695e-09
CLEC1B	51266	1.37916	2.48055e-05	9.20591e-05
SLC2A6	11182	1.37867	3.21982e-12	3.48566e-11
SVOP	55530	1.3784	0.0106297	0.0222247
ADGRE5	976	1.37804	1.04851e-18	2.6379e-17
PLAT	5327	1.37791	6.53787e-15	1.01604e-13
IRF8	3394	1.37613	3.91772e-11	3.67083e-10
PIWIL3	440822	1.37539	0.00284836	0.00689029
OPN5	221391	1.37535	0.00172215	0.00437567
SCN1B	6324	1.37429	2.71232e-10	2.25424e-09
ENPP4	22875	1.37411	9.63226e-11	8.53732e-10
TIMP3	7078	1.37378	9.85862e-17	1.93644e-15
C12orf42	374470	1.37239	0.000725471	0.00200606
LDB2	9079	1.37209	3.94e-12	4.20899e-11
ECI2-DT	100507506	1.37099	1.13183e-13	1.48404e-12
OLAH	55301	1.37085	0.0048278	0.0110339
ZNF608	57507	1.37074	1.13365e-17	2.50754e-16
LRRC34	151827	1.37021	1.02588e-21	3.762e-20
KRT24	192666	1.36885	0.00308975	0.00740495
SRGAP1	57522	1.36881	3.66334e-22	1.41148e-20
APOC1P1	342	1.36842	6.93586e-05	0.000236279
HPCAL4	51440	1.36602	0.000217665	0.000673206
HEG1	57493	1.36504	1.66146e-17	3.58028e-16
PRR5L	79899	1.36428	1.05889e-13	1.39644e-12
GRM3	2913	1.36427	5.72157e-08	3.38317e-07
CA7	766	1.36418	0.0108146	0.0225638
TNFAIP8L1	126282	1.36389	2.38553e-16	4.47876e-15
LAIR1	3903	1.36291	4.18891e-10	3.39266e-09
FAR2	55711	1.3621	1.8787e-09	1.3868e-08
TBC1D21	161514	1.36195	0.0313068	0.0574152
SLC5A12	159963	1.36164	0.0100188	0.0211017
LINC01775	101928602	1.36097	0.00028451	0.000858354
LIMS4	100288695	1.36062	9.66345e-19	2.4459e-17
ALPK2	115701	1.3602	1.88065e-05	7.15274e-05
LINC00398	100874158	1.36018	0.000826554	0.00225918
ZNF257	113835	1.35992	4.57592e-12	4.83275e-11
GLIS3	169792	1.35971	1.71916e-14	2.51878e-13
SMAD1	4086	1.358	8.61754e-20	2.48183e-18
LINC00698	285401	1.35745	0.0495292	0.0854841
PRECSIT	283487	1.35727	3.83016e-16	6.98705e-15
CEP112	201134	1.35695	1.95972e-19	5.42557e-18
CD40LG	959	1.35635	1.83714e-07	1.00438e-06
INPP4B	8821	1.35477	8.40653e-16	1.46228e-14
RHOJ	57381	1.35388	7.82224e-14	1.0543e-12
PTPRM	5797	1.35348	8.60368e-19	2.18427e-17
OR51E1	143503	1.35341	2.10056e-05	7.91234e-05
LINC01989	101927239	1.35325	0.0313869	0.057558
TOP2A	7153	1.35297	6.59465e-11	5.99977e-10
FAM174B	400451	1.35166	2.89084e-14	4.12229e-13
DENND5B	160518	1.35155	1.33498e-14	1.98601e-13
PEG10	23089	1.35147	1.12567e-07	6.3407e-07
H2AC16	8332	1.35045	0.00886669	0.0189295
KRT222	125113	1.34923	1.82983e-06	8.44636e-06
ASPM	259266	1.34919	1.83782e-10	1.56424e-09
GRPR	2925	1.34894	1.25161e-06	5.94474e-06
LINC00629	100506757	1.34803	1.85463e-05	7.05912e-05
SH2D3C	10044	1.34781	4.38328e-13	5.29349e-12
TAL1	6886	1.34699	4.89122e-14	6.77233e-13
GPR3	2827	1.34667	7.35527e-13	8.65754e-12
PLCL2	23228	1.34641	4.05666e-17	8.36099e-16
KCNN1	3780	1.34557	0.000290833	0.000875745
MIR8083	102466879	1.34491	0.00167516	0.0042669
RPS6KA2	6196	1.34408	2.1543e-19	5.93136e-18
CSE1L-DT	102723483	1.34253	0.00179661	0.00454919
STC2	8614	1.34215	8.57756e-08	4.92449e-07
TOR4A	54863	1.34175	4.2987e-11	4.0173e-10
SLC18A1	6570	1.34081	0.0362657	0.0652969
IKZF3	22806	1.34017	3.74692e-07	1.94584e-06
ARPP21	10777	1.33911	0.00882743	0.0188602
B3GNT2	10678	1.33861	1.62577e-22	6.52468e-21
CCDC190	339512	1.3385	0.0319744	0.0584686
PNP	4860	1.33842	4.10278e-14	5.73314e-13
SPATA45	149643	1.33824	0.00421999	0.00980003
SAMD14	201191	1.33629	7.78605e-10	6.09353e-09
SLAMF7	57823	1.33604	3.79391e-08	2.30139e-07
PLEKHO2	80301	1.33585	5.0619e-16	9.12124e-15
MUCL3	135656	1.33533	0.00465512	0.0106966
CCDC42	146849	1.33519	0.00012865	0.000417133
CLDN24	100132463	1.33464	2.37193e-05	8.84424e-05
FBXW12	285231	1.33355	0.0233115	0.0443155
DEPP1	11067	1.33311	2.65957e-09	1.92636e-08
GPR158	57512	1.33236	0.00134621	0.00350753
VASH1	22846	1.33137	2.74002e-11	2.62221e-10
TTLL8	164714	1.33136	0.0295461	0.0545732
STMN1	3925	1.33118	1.97904e-18	4.83352e-17
ATP11C	286410	1.33103	1.5978e-22	6.42269e-21
LIMS3	96626	1.33081	9.20688e-15	1.39792e-13
OR2L13	284521	1.3302	0.0273041	0.050931
SFTA1P	207107	1.3299	0.00138454	0.00359583
PRTFDC1	56952	1.32973	2.43557e-15	4.00337e-14
VCAM1	7412	1.32862	1.54124e-08	9.92219e-08
ADAM12	8038	1.32839	4.07887e-07	2.10602e-06
NPPC	4880	1.32792	9.69605e-05	0.000321786
MAD2L1	4085	1.32768	1.44416e-10	1.25038e-09
ATP8A2	51761	1.32678	1.07303e-07	6.06052e-07
DEPDC1	55635	1.32648	1.54971e-08	9.97213e-08
GNGT2	2793	1.32599	8.88385e-16	1.53891e-14
SYN3	8224	1.32595	1.16438e-11	1.16498e-10
LINC02227	101927697	1.32485	0.00545572	0.0122908
ORF7	HHV8GK18_gp04	1.32471	0.0369293	0.0663324
PDCD1LG2	80380	1.32449	3.84311e-14	5.3883e-13
NINL	22981	1.32445	2.48286e-11	2.38978e-10
LINC00547	400121	1.32365	0.0149867	0.0300874
MYT1	4661	1.32291	0.00284404	0.00688381
PARP15	165631	1.32201	1.32249e-09	1.00036e-08
C5orf58	133874	1.32179	2.03823e-05	7.69954e-05
FCRL2	79368	1.32118	0.00117581	0.00310712
XCL2	6846	1.32118	0.00023426	0.00071965
RASL10A	10633	1.32035	9.766e-09	6.49074e-08
TNFSF13B	10673	1.31916	9.47506e-11	8.41284e-10
FAM162B	221303	1.31842	1.81663e-12	2.0406e-11
FCGR2A	2212	1.31838	1.61975e-09	1.20737e-08
APH1B	83464	1.31822	7.84747e-27	4.89647e-25
CCR4	1233	1.31725	2.25692e-05	8.4531e-05
PHTF1	10745	1.31687	1.63456e-20	5.17672e-19
CRYBB1	1414	1.31678	6.68396e-08	3.92081e-07
MYPN	84665	1.31629	0.000316699	0.000946702
APOA2	336	1.31615	0.0108845	0.0226984
TMEM217	221468	1.31561	5.17795e-12	5.42291e-11
EPHA3	2042	1.31551	7.47477e-09	5.05908e-08
PLA2G5	5322	1.31508	6.32537e-07	3.17001e-06
VNN2	8875	1.31498	1.25413e-07	7.01079e-07
C2CD4B	388125	1.31488	2.62118e-06	1.17385e-05
CD302	9936	1.3141	6.88574e-10	5.43129e-09
SBK3	100130827	1.31298	0.000314438	0.00094084
VSIG4	11326	1.3129	6.27754e-05	0.000215935
OMD	4958	1.31256	3.16781e-06	1.39793e-05
ACOXL-AS1	400997	1.31199	0.00313216	0.00749479
HK3	3101	1.31182	4.5744e-06	1.95634e-05
TEDC2-AS1	729652	1.31112	0.00629725	0.013956
XIRP1	165904	1.31112	1.24333e-05	4.91511e-05
RAMP2	10266	1.31074	1.00052e-12	1.15703e-11
SLC16A3	9123	1.31027	2.12173e-10	1.78949e-09
C4BPB	725	1.30923	0.000446568	0.00129554
SSH2	85464	1.30836	1.31049e-24	6.50912e-23
RAD51AP1	10635	1.3048	1.57687e-13	2.02419e-12
GALNT7	51809	1.30392	4.05609e-16	7.37239e-15
PTPN4	5775	1.3039	6.61542e-19	1.71243e-17
CLSPN	63967	1.30353	6.60314e-15	1.02492e-13
EVI2A	2123	1.30313	9.48513e-09	6.31243e-08
CCDC136	64753	1.30286	2.28438e-12	2.53312e-11
OTOL1	131149	1.30181	0.00382383	0.00897054
CCDC168	643677	1.30172	8.27468e-06	3.38421e-05
GGNBP1	449520	1.30166	0.00146686	0.00378609
RAI14	26064	1.30109	1.6349e-19	4.54635e-18
LINC01812	101927701	1.30095	0.0156207	0.0311631
SPATA13-AS1	100874231	1.30031	0.00416871	0.009698
FGF12	2257	1.2993	2.9827e-08	1.83731e-07
FLNC	2318	1.29881	3.78298e-08	2.29532e-07
ZNF483	158399	1.29873	3.43104e-15	5.5309e-14
FXYD6	53826	1.29764	7.89446e-09	5.31731e-08
LINC02139	400548	1.29734	1.433e-05	5.59701e-05
TULP2	7288	1.2973	0.00487302	0.0111219
TMSB4X	7114	1.29694	5.5264e-13	6.6009e-12
NME5	8382	1.29659	2.63514e-07	1.40543e-06
P2RY10	27334	1.29624	1.04886e-07	5.93607e-07
OMP	4975	1.29618	0.00704236	0.0154301
TNS3	64759	1.29562	7.23117e-19	1.86089e-17
CLEC4D	338339	1.29531	0.00116863	0.00309011
SLC24A2	25769	1.29512	0.0208842	0.0402488
SH3BP5	9467	1.29436	2.25104e-09	1.64279e-08
CD53	963	1.29427	2.56807e-10	2.14145e-09
C20orf204	284739	1.29297	5.75032e-12	5.99233e-11
CAP2	10486	1.29141	1.34531e-06	6.35966e-06
MIR7856	102465842	1.29092	0.000670822	0.00187229
SOCS2	8835	1.29086	1.61606e-16	3.09196e-15
GZMB	3002	1.2908	4.58329e-08	2.75162e-07
FGD5	152273	1.29021	1.06043e-13	1.39773e-12
MIR613	693198	1.29016	0.0453435	0.0791641
DGKD	8527	1.28986	7.98205e-17	1.58648e-15
HSD17B11	51170	1.28977	9.10511e-14	1.21094e-12
BLM	641	1.28962	2.05257e-13	2.59107e-12
PLEKHG1	57480	1.28943	4.66078e-20	1.38844e-18
FIRRE	286467	1.28942	3.1278e-07	1.64717e-06
CFAP74	85452	1.28933	2.36943e-06	1.07163e-05
FUT4	2526	1.28858	8.12202e-20	2.34977e-18
NLGN4X	57502	1.28819	1.62812e-06	7.58931e-06
C3orf70	285382	1.28816	5.77761e-19	1.49865e-17
PIGK	10026	1.28771	4.27308e-16	7.74435e-15
CXCL2	2920	1.28737	0.00602624	0.0134457
TNFRSF9	3604	1.28609	1.04538e-07	5.919e-07
STARD8	9754	1.28555	3.00851e-12	3.27243e-11
RAB8B	51762	1.28539	7.88188e-15	1.20918e-13
FAM228A	653140	1.28524	3.41359e-06	1.49638e-05
CENPF	1063	1.28464	6.90544e-12	7.12208e-11
NECAB2	54550	1.28448	0.000504018	0.00144599
KANK3	256949	1.28382	2.07029e-08	1.3072e-07
ERICH4	100170765	1.28329	5.40342e-05	0.000188504
KASH5	147872	1.28307	0.0223438	0.0426847
SMC4	10051	1.28277	6.72704e-17	1.35301e-15
CYTH4	27128	1.28263	3.05996e-10	2.52145e-09
IQGAP2	10788	1.28208	5.59694e-15	8.7633e-14
HDX	139324	1.28204	9.93202e-20	2.82135e-18
TRIM2	23321	1.28163	2.17358e-19	5.96498e-18
KCNIP1-AS1	105377716	1.28143	0.0168866	0.0333543
AVPR1A	552	1.2814	2.18141e-07	1.17898e-06
SIRPG-AS1	101929010	1.28136	0.000571226	0.00161643
MECOM	2122	1.28016	6.51624e-11	5.93489e-10
SPRY4	81848	1.28009	1.89134e-10	1.60869e-09
GIMAP6	474344	1.27911	2.95615e-14	4.21302e-13
KIF17	57576	1.27884	2.04906e-11	1.9898e-10
ACSL6	23305	1.27719	4.29002e-09	2.99991e-08
C5orf64	285668	1.27708	0.000448308	0.00130014
CDKN2B-AS1	100048912	1.27705	1.80678e-10	1.53834e-09
USP13	8975	1.27622	9.07153e-23	3.79235e-21
CCL3	6348	1.27616	2.47841e-05	9.20023e-05
COL10A1	1300	1.27512	0.000389549	0.00114496
RASSF8	11228	1.27342	4.00975e-13	4.87762e-12
PDE4B-AS1	101927139	1.2731	0.0315602	0.0578123
CD48	962	1.27178	4.48469e-09	3.12558e-08
UCP1	7350	1.27172	0.00184713	0.00466394
TACC1	6867	1.27167	1.4491e-19	4.05666e-18
REEP1	65055	1.27113	1.20208e-12	1.37553e-11
DLC1	10395	1.26956	2.09761e-14	3.03696e-13
C2CD6	151254	1.26945	1.27951e-07	7.15104e-07
HGF	3082	1.26896	6.70122e-08	3.93002e-07
KCNJ8	3764	1.26824	9.0932e-10	7.04618e-09
GPR171	29909	1.26724	1.80188e-07	9.8661e-07
ENPP6	133121	1.26717	2.02449e-06	9.27155e-06
LAIR2	3904	1.26698	0.000505721	0.00145021
LY86	9450	1.26604	1.7945e-07	9.83214e-07
FLI1	2313	1.2653	2.25004e-18	5.44241e-17
CMTM3	123920	1.26476	1.90732e-16	3.62984e-15
KLHL6-AS1	100874019	1.26462	0.0249202	0.0469733
PPM1F	9647	1.26414	2.25117e-19	6.15769e-18
SEC24D	9871	1.26296	2.57023e-15	4.21367e-14
CLEC1A	51267	1.26279	1.02886e-14	1.55369e-13
TP53I11	9537	1.26228	1.10614e-17	2.45316e-16
UNC5B	219699	1.26207	6.06457e-13	7.20595e-12
SH2D1B	117157	1.26195	7.22542e-06	2.98871e-05
S1PR3	1903	1.26151	2.61284e-12	2.87014e-11
DOCK10	55619	1.26142	4.47513e-14	6.2361e-13
SESTD1	91404	1.26106	8.69188e-18	1.95884e-16
SAMD4A	23034	1.26035	6.51712e-18	1.48743e-16
PGM5	5239	1.25987	9.60122e-11	8.51281e-10
COL4A2-AS1	100874203	1.25952	0.000161247	0.000512618
CERKL	375298	1.25821	2.12624e-07	1.15239e-06
BEND4	389206	1.25788	0.0001864	0.000584508
KLRD1	3824	1.25687	2.40286e-07	1.29032e-06
PCDHB10	56126	1.25676	1.0677e-21	3.90966e-20
DOCK11	139818	1.2565	1.68988e-12	1.90505e-11
TNFRSF17	608	1.25446	0.00473428	0.0108546
LINC00654	149837	1.25369	3.76197e-10	3.06369e-09
HIF1A	3091	1.25368	1.94521e-09	1.43252e-08
C1QA	712	1.25179	1.21104e-05	4.79882e-05
LRRC73	221424	1.25172	1.21959e-05	4.82813e-05
NT5DC4	284958	1.2513	1.62908e-05	6.27588e-05
CT55	54967	1.25122	0.00476638	0.0109173
PEAK1	79834	1.25102	5.82822e-18	1.33628e-16
FOXD2-AS1	84793	1.25053	3.49909e-11	3.2983e-10
AKT3	10000	1.2504	9.4138e-12	9.53276e-11
CALHM5	254228	1.2502	1.81319e-08	1.15462e-07
IL4I1	259307	1.25012	1.87195e-05	7.12183e-05
KLF2	10365	1.24955	2.33446e-08	1.46132e-07
IRAK3	11213	1.24941	3.52413e-15	5.67367e-14
KLHL4	56062	1.24929	0.000493755	0.00141979
ABI3	51225	1.24797	7.61402e-13	8.94532e-12
ANGPT1	284	1.24737	7.68054e-08	4.45436e-07
UTRN	7402	1.24721	5.42327e-20	1.60985e-18
TEX26	122046	1.24704	0.0411918	0.0730187
HYAL2	8692	1.24694	4.12028e-17	8.48513e-16
CNRIP1	25927	1.2467	7.67516e-15	1.17891e-13
NTS	4922	1.24649	0.0251045	0.0472781
VOPP1	81552	1.24612	2.72312e-17	5.72539e-16
TET1	80312	1.24609	3.91126e-17	8.07457e-16
PRSS23	11098	1.24568	3.45438e-08	2.10767e-07
LINC02265	101060498	1.24558	0.0475299	0.0824876
IL6ST	3572	1.2455	6.79133e-15	1.05152e-13
SH2B3	10019	1.24313	8.49144e-14	1.13656e-12
RAG1	5896	1.24208	1.98403e-15	3.29137e-14
TNPO1	3842	1.24179	4.96613e-16	8.96155e-15
LY6G5C	80741	1.24137	0.000490877	0.00141249
MELK	9833	1.24021	5.30368e-10	4.23805e-09
SNORA11D	100124541	1.24	0.00201904	0.00505626
LINC00857	439990	1.23994	5.19862e-06	2.20489e-05
GIMAP2	26157	1.23965	8.20591e-14	1.1001e-12
LINC00924	145820	1.23953	6.69697e-05	0.000228882
GPIHBP1	338328	1.23854	2.95365e-05	0.000108137
ANKRD7	56311	1.23848	0.00941912	0.0199645
TPTE	7179	1.23834	0.000190893	0.000597303
PDLIM3	27295	1.23817	4.10106e-10	3.32795e-09
CHGB	1114	1.23732	0.00179945	0.00455593
INSR	3643	1.23732	3.06403e-15	4.968e-14
ARL15	54622	1.23691	2.03385e-13	2.57132e-12
ACSL5	51703	1.23663	7.76579e-18	1.75486e-16
PTPN22	26191	1.23643	5.37842e-08	3.19533e-07
FAM9C	171484	1.23632	0.00662552	0.0146151
MMP25	64386	1.23606	7.42397e-10	5.83016e-09
HOXB-AS3	404266	1.23558	0.000110806	0.000363647
LTBP1	4052	1.23537	2.55651e-10	2.13252e-09
PCDHB16	57717	1.23511	7.15308e-17	1.43079e-15
FAM43A	131583	1.23494	2.076e-14	3.00996e-13
RFX8	731220	1.23403	6.28972e-08	3.70167e-07
GOLIM4	27333	1.23391	5.65146e-18	1.3029e-16
ST3GAL2	6483	1.23381	5.72095e-18	1.31529e-16
TCF4	6925	1.23357	1.33841e-18	3.31406e-17
FMNL3	91010	1.23325	1.08335e-12	1.24936e-11
PCDHB13	56123	1.23318	4.66974e-14	6.48207e-13
CD8A	925	1.23155	8.55061e-07	4.18243e-06
MIR4444-2	100846999	1.23146	3.11194e-07	1.64019e-06
RASSF2	9770	1.23074	2.45527e-14	3.52724e-13
SPARC	6678	1.23072	2.97342e-08	1.83204e-07
CBLB	868	1.2305	4.14541e-20	1.24526e-18
ARHGAP25	9938	1.22991	1.4636e-17	3.18399e-16
FAP	2191	1.22957	2.34726e-05	8.76398e-05
LBH	81606	1.22921	3.85428e-18	9.03521e-17
PALD1	27143	1.22905	1.84648e-11	1.80425e-10
LINC00861	100130231	1.22893	1.02383e-05	4.12014e-05
CDC42BPA	8476	1.22893	1.38112e-23	6.2195e-22
DBN1	1627	1.22837	6.82451e-11	6.19765e-10
SYNJ1	8867	1.22831	7.75444e-19	1.9807e-17
ADAM10	102	1.22768	1.58307e-17	3.42312e-16
RGS1	5996	1.22756	0.00152329	0.00391563
ZNF793-AS1	101927720	1.22667	1.56204e-14	2.29934e-13
CASP4LP	643733	1.2265	3.74235e-06	1.62968e-05
SLC41A1	254428	1.22622	1.7696e-14	2.58967e-13
PCDHA7	56141	1.22599	1.19837e-05	4.75538e-05
HLX-AS1	100873924	1.22492	0.000226403	0.000698165
C22orf42	150297	1.2248	0.022363	0.0427084
SEC23A	10484	1.2246	6.74671e-17	1.35491e-15
ZNF80	7634	1.22385	0.000301787	0.000905471
MYH13	8735	1.22363	0.000186769	0.000585446
OAF	220323	1.2234	2.02012e-10	1.71127e-09
ZNF521	25925	1.22287	1.27995e-14	1.90873e-13
CH25H	9023	1.22109	2.14537e-06	9.7805e-06
PAQR8	85315	1.22084	3.43778e-20	1.04142e-18
FPR3	2359	1.22028	5.64722e-08	3.34315e-07
GPR4	2828	1.21983	2.67455e-07	1.42463e-06
SLC22A11	55867	1.21927	0.0388946	0.0694521
SOAT1	6646	1.21915	9.41791e-10	7.27084e-09
POLR3G	10622	1.21871	1.33483e-08	8.68071e-08
ARMCX3	51566	1.21816	5.8364e-21	1.95714e-19
KLHL2	11275	1.21775	3.54513e-22	1.36804e-20
WDR64	128025	1.21737	0.00877001	0.0187471
ZGRF1	55345	1.21712	2.92065e-17	6.12018e-16
EPHB1	2047	1.21685	5.22532e-11	4.82928e-10
CD68	968	1.21663	1.04987e-10	9.25297e-10
ASCL3	56676	1.21556	0.0153774	0.0307511
CDH6	1004	1.21518	6.33675e-07	3.17445e-06
C2orf50	130813	1.21448	5.32571e-05	0.000185999
BATF	10538	1.21433	5.3105e-07	2.69806e-06
KIF18A	81930	1.21379	7.55345e-10	5.92443e-09
TIGIT	201633	1.21349	3.92401e-07	2.03191e-06
FYN	2534	1.2133	3.93314e-26	2.28898e-24
CCL25	6370	1.21302	0.00950523	0.0201232
NDC80	10403	1.21238	9.98112e-11	8.83715e-10
RAG2	5897	1.21229	0.0307937	0.0565902
GPR15	2838	1.2105	0.0156474	0.0312114
H2AC14	8331	1.21016	0.00076377	0.00210431
ASAP1	50807	1.21001	2.15874e-19	5.93136e-18
SPRY4-AS1	101926941	1.20985	1.17088e-05	4.65146e-05
ZNF804A	91752	1.20965	0.000196397	0.000612932
TMEM156	80008	1.2095	1.13566e-05	4.52299e-05
SMYD2	56950	1.20945	6.36251e-15	9.91864e-14
TMEM150C	441027	1.2089	1.02196e-11	1.02906e-10
MIR874	100126343	1.20878	0.0188516	0.0368153
ANGPTL5	253935	1.2083	0.00152758	0.00392466
DTL	51514	1.20816	2.75802e-13	3.42811e-12
FANCB	2187	1.2079	2.24335e-12	2.48982e-11
REEP3	221035	1.20682	1.79707e-17	3.84934e-16
ZNF382	84911	1.20613	6.05004e-15	9.43738e-14
MEX3B	84206	1.20569	3.72919e-12	3.99229e-11
LACC1	144811	1.20567	9.55905e-14	1.26661e-12
CNTN4	152330	1.2048	3.75539e-06	1.63507e-05
CFAP47	286464	1.20469	0.0322002	0.0588514
LYSMD3	116068	1.20454	5.02529e-13	6.02819e-12
CEP55	55165	1.20404	6.01884e-09	4.126e-08
PNOC	5368	1.20399	0.000899545	0.00244191
ADAMTS9	56999	1.20345	4.09931e-10	3.32761e-09
RDX	5962	1.20336	3.20097e-15	5.17999e-14
POGLUT2	79070	1.20282	7.75999e-16	1.36115e-14
LINC01393	102724386	1.20247	0.00199869	0.00501032
RGS13	6003	1.20216	0.000120442	0.000392649
SPOCK2	9806	1.2002	7.1317e-06	2.9553e-05
FASLG	356	1.20017	6.14685e-06	2.57613e-05
LINC01410	103352539	1.19949	1.06266e-09	8.14633e-09
FAM124A	220108	1.19926	3.69089e-16	6.75757e-15
TNFRSF10D	8793	1.19723	9.77393e-10	7.5341e-09
ADPRH	141	1.19714	1.13845e-16	2.21879e-15
IRGM	345611	1.19631	0.00128121	0.00335806
ACSL3	2181	1.19631	2.66969e-17	5.61777e-16
ELOVL5	60481	1.19626	6.10588e-13	7.2516e-12
RAB42	115273	1.19621	5.64413e-08	3.34211e-07
RGS3	5998	1.19609	1.02067e-15	1.74994e-14
PRF1	5551	1.19585	2.72497e-07	1.44933e-06
KCNH6	81033	1.19578	0.0194814	0.0378594
MIR887	100126347	1.19495	0.0317655	0.0581374
ANXA2R-OT1	648987	1.19458	1.45654e-23	6.53568e-22
PDE4DIPP4	101929798	1.19446	0.00196387	0.0049309
CDC42EP2	10435	1.19437	7.98965e-08	4.61761e-07
LAMC1	3915	1.19436	2.95806e-16	5.4758e-15
SH3TC1	54436	1.19399	6.95622e-09	4.72853e-08
LINC02254	101927286	1.19368	0.0423313	0.0747323
SUSD1	64420	1.19349	1.56407e-16	3.00856e-15
IL21R	50615	1.19288	1.42041e-08	9.19437e-08
RAP1B	5908	1.19272	4.45083e-17	9.11349e-16
WWC2	80014	1.19168	2.29837e-18	5.54861e-17
DGKI	9162	1.19158	4.82446e-07	2.46863e-06
ACTR2	10097	1.19108	1.90937e-14	2.778e-13
SPC25	57405	1.19091	1.00731e-08	6.67889e-08
LHFPL2	10184	1.18955	1.24874e-11	1.24393e-10
NEK2	4751	1.18873	1.74402e-08	1.11331e-07
AOAH-IT1	100874264	1.18839	0.046171	0.0803794
PDIA5	10954	1.18831	4.38594e-19	1.16169e-17
ZNF726	730087	1.18802	5.42131e-11	4.99569e-10
HAVCR1	26762	1.18788	0.00153686	0.00394687
TRAK2	66008	1.18624	3.21778e-19	8.62304e-18
CASP12	100506742	1.18611	8.93578e-06	3.63032e-05
RNF175	285533	1.1854	9.86297e-13	1.14269e-11
CDK1	983	1.18525	2.70722e-09	1.95467e-08
MIR4645	100616285	1.1851	0.00390369	0.0091408
KLRC1	3821	1.18497	9.99137e-05	0.000330756
SMIM9	100132963	1.18473	0.0106952	0.0223444
RP2	6102	1.18445	1.25909e-14	1.88211e-13
MANEA	79694	1.18419	4.82831e-11	4.48052e-10
OXCT2	64064	1.18409	3.87207e-06	1.68062e-05
EAF2	55840	1.18378	7.21331e-07	3.57431e-06
SERPINE1	5054	1.18359	2.11446e-05	7.96113e-05
TMEM239	100288797	1.18318	0.0290284	0.0537485
DPPA4	55211	1.18211	0.0199219	0.0385959
WASIR2	100132169	1.18129	0.0161879	0.0321769
EFR3B	22979	1.18098	1.67725e-13	2.14755e-12
ACVRL1	94	1.18071	1.91972e-09	1.41458e-08
TLR2	7097	1.18064	8.57824e-12	8.72893e-11
SGCB	6443	1.18032	8.06489e-15	1.23424e-13
BRSK1	84446	1.18026	2.3292e-06	1.05534e-05
GBX2	2637	1.17934	0.00221925	0.00550761
CHAC1	79094	1.17911	8.39355e-05	0.00028197
PKN1	5585	1.17907	1.03866e-07	5.88228e-07
PCDH18	54510	1.1786	5.44047e-07	2.75572e-06
FBXL7	23194	1.17798	2.04231e-12	2.27879e-11
ONECUT2	9480	1.17756	0.00578656	0.0129686
RBM38	55544	1.17745	2.4086e-16	4.51532e-15
FAM225B	100128385	1.17684	2.05958e-07	1.11747e-06
PANTR1	100506421	1.17677	0.0102583	0.0215375
BCL2L11	10018	1.17545	1.18619e-18	2.95463e-17
MSRB3	253827	1.17543	1.04532e-10	9.21608e-10
N4BP3	23138	1.17536	4.57743e-10	3.68471e-09
DIAPH3	81624	1.17485	5.39795e-11	4.976e-10
ADAMTS9-AS1	101929335	1.17389	0.000266324	0.00080822
ST3GAL1	6482	1.17348	2.18539e-13	2.75043e-12
SLF1	84250	1.17327	1.65772e-17	3.5753e-16
PPEF1	5475	1.17262	0.0011999	0.00316545
DNAJC10	54431	1.17244	1.55279e-17	3.36343e-16
B3GNT7	93010	1.17165	1.34723e-06	6.36633e-06
EMILIN1	11117	1.17149	2.99362e-07	1.58182e-06
AMELX	265	1.17139	0.0154524	0.0308815
DNAJC18	202052	1.17121	2.97076e-16	5.49524e-15
PCDHGA6	56109	1.17094	1.68816e-11	1.65666e-10
RNF144A	9781	1.17008	7.35026e-18	1.66847e-16
LINC00494	284749	1.16981	0.0379784	0.0679951
PHTF2	57157	1.16972	1.42875e-15	2.41004e-14
CD22	933	1.16932	0.000135408	0.000437123
LIX1	167410	1.169	5.62517e-05	0.000195478
CBLN2	147381	1.16892	0.0244127	0.0461762
SERPINI1	5274	1.16888	5.1188e-10	4.09729e-09
PHOSPHO1	162466	1.16835	8.17659e-08	4.71696e-07
PWWP3B	139221	1.16834	0.0158041	0.0314839
FSD1L	83856	1.16812	2.47425e-14	3.55043e-13
TCIM	56892	1.16804	3.42836e-06	1.50181e-05
ADRA1A	148	1.16802	0.00485972	0.0110966
FHIP2A	57700	1.16739	1.58624e-19	4.41593e-18
ZNF93	81931	1.16732	3.09311e-15	5.00869e-14
FKBP7	51661	1.16666	9.80609e-10	7.55192e-09
GJA5	2702	1.16652	7.61058e-06	3.13613e-05
ICAM2	3384	1.16615	1.77792e-11	1.73862e-10
HDGFL3	50810	1.16601	1.40076e-12	1.58983e-11
LRRIQ1	84125	1.16583	0.00304932	0.00731505
SULT1B1	27284	1.16567	3.5224e-05	0.000127254
ACSM2B	348158	1.16541	0.000706292	0.00195929
KIF3C	3797	1.16481	2.41773e-15	3.97665e-14
MIR6503	102465250	1.16467	0.00512015	0.0116152
SIGLEC9	27180	1.16449	1.37501e-07	7.65409e-07
TMEM255B	348013	1.1643	5.93244e-09	4.07176e-08
UGGT2	55757	1.16343	7.31428e-17	1.45954e-15
ARHGEF6	9459	1.16337	1.08161e-16	2.1142e-15
LINC02159	285629	1.16333	3.39955e-05	0.000123046
AADACP1	201651	1.16227	0.000632989	0.00177558
C2CD4C	126567	1.162	5.15894e-05	0.000180603
TIAM2	26230	1.16097	3.63531e-10	2.96825e-09
NRROS	375387	1.16091	1.35071e-11	1.33912e-10
BTNL8	79908	1.16054	0.00076975	0.00211869
ZBTB20	26137	1.16014	1.03786e-13	1.37086e-12
KYNU	8942	1.16001	1.18246e-09	9.00141e-09
CKAP2L	150468	1.15986	6.24907e-09	4.27332e-08
CPAMD8	27151	1.15952	5.42652e-06	2.29444e-05
BMP2	650	1.15939	2.91192e-08	1.79591e-07
MAP3K7CL	56911	1.15901	1.92309e-16	3.65709e-15
SLC6A17	388662	1.15824	4.4655e-09	3.11393e-08
RHOH	399	1.15803	2.8314e-08	1.74711e-07
SCN11A	11280	1.15748	0.00907933	0.0193292
GXYLT1	283464	1.15714	2.18334e-16	4.13006e-15
LMNTD1	160492	1.15675	0.0225654	0.0430687
TMEM47	83604	1.15598	2.97755e-10	2.46082e-09
HOMER1	9456	1.1554	2.25354e-08	1.41491e-07
RRM2	6241	1.15529	2.74865e-09	1.98116e-08
CD86	942	1.15522	3.81306e-09	2.68886e-08
FAM171B	165215	1.15403	1.36512e-11	1.35181e-10
GUCY1B1	2983	1.15251	2.26026e-08	1.41877e-07
LRRC63	220416	1.15213	6.8397e-06	2.84228e-05
NPR1	4881	1.15173	7.22596e-08	4.21215e-07
SMC2	10592	1.1514	5.34096e-14	7.3568e-13
SLCO2B1	11309	1.15138	9.09934e-09	6.06373e-08
LINC00960	401074	1.15137	5.20086e-05	0.000181943
LYPD1	116372	1.15107	3.57731e-05	0.000129015
MROCKI	285758	1.15084	3.25136e-06	1.43152e-05
CLIC4	25932	1.15048	1.42023e-12	1.61047e-11
ITSN1	6453	1.1502	2.33453e-20	7.22925e-19
GP5	2814	1.15019	0.000120998	0.000394156
STAB1	23166	1.14982	1.94898e-07	1.06159e-06
ENPEP	2028	1.14946	8.26933e-06	3.38258e-05
TMEM236	653567	1.14838	1.6421e-07	9.05446e-07
MGAT4A	11320	1.14787	4.09733e-13	4.97692e-12
MYH1	4619	1.14779	0.0150778	0.030246
HEY1	23462	1.14725	1.8225e-09	1.34798e-08
DYNLT5	200132	1.14691	6.45588e-08	3.795e-07
RPSAP52	204010	1.14643	0.0017803	0.004512
OXTR	5021	1.14596	1.28495e-05	5.06687e-05
ASRGL1	80150	1.14589	1.986e-08	1.25795e-07
INSM1	3642	1.14542	0.0164831	0.0326705
KIF21B	23046	1.14532	2.16593e-08	1.364e-07
SNX4	8723	1.14501	3.71363e-16	6.79423e-15
PIM2	11040	1.14389	1.1205e-05	4.4683e-05
GP9	2815	1.14366	0.0129996	0.0265205
RASSF9	9182	1.14351	1.77589e-10	1.5141e-09
CD2	914	1.14275	2.02592e-06	9.2764e-06
NCAPG	64151	1.14264	3.89232e-09	2.73707e-08
CDKN2A	1029	1.14237	1.67038e-08	1.06774e-07
MAP1S	55201	1.14185	4.62754e-12	4.88276e-11
CMKLR1	1240	1.1418	1.0649e-07	6.01665e-07
ERAP2	64167	1.14157	7.48034e-05	0.000253725
HCLS1	3059	1.14131	2.02803e-11	1.97014e-10
PRMT8	56341	1.14068	0.00464365	0.0106732
KIF25	3834	1.14066	2.47398e-07	1.32624e-06
COTL1	23406	1.14052	4.29213e-13	5.19341e-12
KLRF1	51348	1.14039	1.99482e-05	7.55262e-05
C2	717	1.13936	3.09898e-06	1.37214e-05
MKI67	4288	1.13881	1.86778e-09	1.37915e-08
IL12RB1	3594	1.13825	1.04974e-07	5.93968e-07
SLC4A1	6521	1.13793	0.0473925	0.0822833
RASAL3	64926	1.13665	3.85151e-08	2.33464e-07
KDELR3	11015	1.1365	3.52568e-10	2.88343e-09
ROCK1	6093	1.13614	7.31956e-19	1.87919e-17
RUBCNL	80183	1.13602	2.43486e-09	1.77282e-08
H3C7	8968	1.13564	0.0317261	0.0580739
A2MP1	3	1.13464	6.74346e-05	0.000230319
FOXD2	2306	1.13362	8.30157e-09	5.57207e-08
OR3A1	4994	1.1334	0.0311725	0.0571982
HOXD4	3233	1.13326	3.27751e-10	2.69099e-09
TMIGD3	57413	1.13321	0.00213414	0.0053185
B3GALT2	8707	1.13209	2.97119e-06	1.31952e-05
ARHGEF15	22899	1.1311	5.43172e-09	3.74914e-08
ZNF141	7700	1.13107	5.6817e-08	3.36125e-07
KALRN	8997	1.13094	1.65901e-14	2.43524e-13
ST3GAL5	8869	1.13048	1.39814e-14	2.06778e-13
NFE4	58160	1.13009	0.0340159	0.0617695
MIR3916	100500849	1.12994	3.02316e-07	1.59642e-06
TMED5	50999	1.12945	4.48898e-13	5.41853e-12
CDH26	60437	1.12913	8.84376e-09	5.91068e-08
GXYLT2	727936	1.12905	9.66703e-05	0.00032095
COL5A2	1290	1.12816	3.9042e-07	2.02249e-06
FOXN2	3344	1.1278	2.49389e-14	3.57478e-13
LINC01864	101928886	1.12758	0.029565	0.0546042
HOXD9	3235	1.12744	4.80927e-08	2.87902e-07
MTMR6	9107	1.12739	1.83272e-17	3.92236e-16
ADGRE3	84658	1.1273	0.00234323	0.00578611
PRKAA2	5563	1.12595	5.40888e-05	0.000188641
MPDZ	8777	1.12517	7.58308e-11	6.82722e-10
CDR2L	30850	1.12511	7.19292e-13	8.47839e-12
SIRPG	55423	1.12509	1.1413e-06	5.45449e-06
MIR549A	693132	1.12493	0.0326281	0.0595164
CBLN4	140689	1.12461	0.0246762	0.0465939
MIR1915	100302129	1.12433	0.0190693	0.0371767
GPR160	26996	1.12377	3.39842e-14	4.8051e-13
EFCAB14	9813	1.12359	2.1921e-17	4.65575e-16
DPY19L1	23333	1.12334	1.66879e-15	2.79241e-14
SLC26A5-AS1	101927870	1.12311	0.00115222	0.00305091
NRAS	4893	1.12186	1.3073e-14	1.94721e-13
UCP2	7351	1.12134	2.91861e-09	2.09464e-08
PLXND1	23129	1.12127	2.04623e-09	1.50119e-08
LINC01426	100506385	1.12121	2.28792e-05	8.56279e-05
STAP1	26228	1.12075	0.000901747	0.00244763
LINC02181	440390	1.12006	0.0289295	0.0535804
TLR10	81793	1.11943	7.95856e-05	0.000268674
SLC28A1	9154	1.11938	0.000113283	0.000370968
TRGC1	445347	1.11935	1.14343e-05	4.55247e-05
SLC38A1	81539	1.11822	4.75834e-12	5.00434e-11
DENND3	22898	1.11761	2.26104e-11	2.18718e-10
LOXL2	4017	1.11737	1.99942e-07	1.08694e-06
MUC19	283463	1.11709	0.0209532	0.0403678
HTR1D	3352	1.11705	0.0180779	0.0354506
FUCA2	2519	1.1163	8.40138e-13	9.82433e-12
RANBP17	64901	1.11607	4.90701e-07	2.50728e-06
SYNGR4	23546	1.11584	0.0483664	0.0837076
SOX18	54345	1.11572	1.78324e-06	8.24956e-06
CPVL-AS2	100506497	1.11449	6.59508e-09	4.49284e-08
HAGLR	401022	1.11404	5.91508e-11	5.42479e-10
GALNT9	50614	1.11383	0.0229884	0.0437662
PURPL	643401	1.11345	0.0412574	0.0731195
H2AC13	8329	1.1129	0.00220825	0.00548302
CD96	10225	1.11285	1.00187e-06	4.83733e-06
NIBAN1	116496	1.11278	3.37295e-16	6.20261e-15
GRK5	2869	1.11257	2.98177e-17	6.24305e-16
CACNG1	786	1.11224	0.047113	0.0818433
CEP290	80184	1.11193	2.85165e-14	4.06871e-13
IL1RAPL1	11141	1.1116	0.0195283	0.0379389
ADAMTS12	81792	1.11153	6.96721e-06	2.89144e-05
RAPGEF2	9693	1.11012	5.42305e-19	1.4096e-17
SLC35G2	80723	1.11	5.22228e-13	6.24954e-12
SNORD109A	338428	1.10996	0.00766924	0.0166465
MARCKSL1	65108	1.10993	4.825e-11	4.4791e-10
TSPAN11	441631	1.10991	1.55783e-07	8.61444e-07
LINC01257	116437	1.10975	0.00488711	0.01115
ANXA2R	389289	1.10947	3.12281e-11	2.96478e-10
MFAP5	8076	1.10943	0.00519891	0.0117672
PGM5P2	595135	1.1093	3.22289e-12	3.48748e-11
LINC00299	339789	1.10907	0.000765939	0.00210926
SLC27A3	11000	1.10881	5.3736e-11	4.95536e-10
PKD2L1	9033	1.10842	0.00164966	0.0042077
CXCL13	10563	1.10841	0.00861447	0.0184586
MAN2A1	4124	1.10767	2.68614e-15	4.38935e-14
BMERB1	89927	1.10761	2.92811e-15	4.75377e-14
ARAP3	64411	1.1071	9.47104e-10	7.3096e-09
LOH12CR2	503693	1.10709	6.51784e-07	3.25672e-06
PRXL2C	195827	1.10674	1.89427e-11	1.84735e-10
ODF2L	57489	1.10638	2.04894e-16	3.88462e-15
CCPG1	9236	1.10633	4.40923e-17	9.03569e-16
CABP4	57010	1.10622	3.25866e-12	3.51859e-11
KCTD12	115207	1.10622	2.23671e-11	2.16448e-10
TICAM2	353376	1.10609	0.00142639	0.00369381
KCNN2	3781	1.10609	5.46957e-07	2.76878e-06
AGPAT5	55326	1.10601	7.40027e-15	1.14088e-13
SEMA6B	10501	1.10595	1.63898e-06	7.63852e-06
NOVA1	4857	1.10429	0.000597186	0.00168438
RAMP2-AS1	100190938	1.10408	4.75387e-08	2.84925e-07
PALM2AKAP2	445815	1.10373	0.000169882	0.000537277
F2R	2149	1.10365	1.44465e-10	1.25038e-09
NR1I2	8856	1.10319	0.00766014	0.0166326
LINC00472	79940	1.10261	6.57343e-10	5.19639e-09
L3MBTL3	84456	1.10118	2.08364e-17	4.44043e-16
ADAMTSL3	57188	1.09979	7.23956e-07	3.58519e-06
MCM6	4175	1.09969	4.42706e-22	1.69533e-20
RB1	5925	1.09909	2.22303e-12	2.46836e-11
LINC01237	101927289	1.09898	0.00594745	0.0132852
CD3D	915	1.09884	9.87081e-07	4.77695e-06
EFCAB14-AS1	100130197	1.09858	0.000266346	0.00080822
FHAD1	114827	1.09837	1.94582e-07	1.06033e-06
PCDHB6	56130	1.09755	3.05078e-10	2.51637e-09
RPGRIP1	57096	1.09735	2.63442e-13	3.27611e-12
ABHD17C	58489	1.09732	4.97809e-12	5.22668e-11
H2AC11	8969	1.0968	0.00149729	0.0038551
AATK	9625	1.09648	9.63023e-08	5.47868e-07
NES	10763	1.09634	1.24906e-07	6.98552e-07
SCAT1	101928710	1.09626	0.00764117	0.0165986
CCM2L	140706	1.09605	8.33047e-10	6.50135e-09
PCDHA6	56142	1.09593	0.003104	0.00743464
FKBP1A	2280	1.09531	7.52649e-13	8.85492e-12
PARPBP	55010	1.09494	1.57614e-11	1.55219e-10
HLX	3142	1.09447	1.68593e-11	1.65512e-10
GLIPR1	11010	1.09431	3.88582e-08	2.35487e-07
LINC02078	100652929	1.09417	0.0416392	0.073666
TSN	7247	1.09414	7.69464e-18	1.74192e-16
UACA	55075	1.09403	6.69446e-11	6.08616e-10
GLIPR2	152007	1.09385	1.83165e-09	1.35406e-08
EBF2	64641	1.09307	7.74103e-05	0.000261965
FAM124B	79843	1.093	1.11391e-07	6.2801e-07
PROB1	389333	1.09226	2.50411e-09	1.81849e-08
SLC7A11-AS1	641364	1.09202	0.0242468	0.045904
TMEM263	90488	1.09182	2.17527e-15	3.58962e-14
CRACR2A	84766	1.09055	1.87868e-07	1.02575e-06
PCDHA9	9752	1.09034	0.0226044	0.0431244
NLRP3	114548	1.0903	3.13174e-06	1.38445e-05
LINC01132	100506810	1.08998	2.54086e-07	1.35861e-06
CARD8	22900	1.0899	9.8831e-18	2.2114e-16
NAV3	89795	1.08985	2.33264e-12	2.5832e-11
CD33	945	1.08981	1.03406e-08	6.84365e-08
FAM225A	286333	1.08889	1.98838e-07	1.08141e-06
CNN3	1266	1.08875	2.51322e-11	2.41807e-10
GDPD5	81544	1.08764	2.13728e-07	1.15787e-06
HVCN1	84329	1.08721	3.55198e-16	6.52228e-15
MARCHF1	55016	1.08648	4.2608e-08	2.56969e-07
CHEK1	1111	1.08636	2.61961e-16	4.87446e-15
CCNJL	79616	1.08621	2.59448e-09	1.88139e-08
TENT5C	54855	1.08612	0.000120673	0.000393351
HAVCR2	84868	1.08608	9.93655e-10	7.64536e-09
CCDC144NL	339184	1.08487	0.0424534	0.0749032
ANKRD36C	400986	1.08471	7.02298e-11	6.35947e-10
SOCS2-AS1	144481	1.08448	4.45418e-10	3.59127e-09
RNASE6	6039	1.08429	1.38899e-06	6.54521e-06
HIPK2	28996	1.08417	3.01233e-12	3.27517e-11
SLFN5	162394	1.08385	9.96597e-09	6.61314e-08
RASSF3	283349	1.0837	2.80797e-20	8.62084e-19
LINC02753	101928443	1.08366	0.0322978	0.0589948
CYBA	1535	1.08297	7.01299e-07	3.48399e-06
DUSP6	1848	1.0819	6.19899e-14	8.47353e-13
HOXA11-AS	221883	1.08182	1.5395e-05	5.9702e-05
[truncated: 10,733 more rows]

## Sheet: 4-C2vsC3
	entrez	log2FoldChange	pvalue	padj	gene
K5	HHV8GK18_gp16	5.96171	7.26478e-14	2.30678e-12	K5
SLC18A3	6572	5.89398	9.79736e-07	6.25426e-06	SLC18A3
K4.2	HHV8GK18_gp14	5.49226	7.18525e-10	9.45641e-09	K4.2
vIRF-4	HHV8GK18_gp63	5.22638	5.163e-14	1.69646e-12	vIRF-4
CACNG5	27091	5.19211	6.58325e-08	5.58927e-07	CACNG5
K6	HHV8GK18_gp17	5.17329	2.0403e-09	2.46453e-08	K6
K4	HHV8GK18_gp13	5.01813	6.18935e-08	5.28956e-07	K4
K8.1	HHV8GK18_gp55	4.81998	3.81877e-13	1.04234e-11	K8.1
vIRF-3	HHV8GK18_gp64	4.80086	9.36386e-11	1.49051e-09	vIRF-3
ORF6	HHV8GK18_gp03	4.66528	7.31399e-11	1.19442e-09	ORF6
ORF58	HHV8GK18_gp68	4.56108	1.38571e-10	2.12975e-09	ORF58
ORF39	HHV8GK18_gp43	4.52002	2.73802e-09	3.20786e-08	ORF39
ORF65	HHV8GK18_gp76	4.51387	5.6295e-12	1.17297e-10	ORF65
ORF60	HHV8GK18_gp67	4.50111	7.75471e-12	1.56787e-10	ORF60
ORF57	HHV8GK18_gp61	4.45156	1.20126e-10	1.86614e-09	ORF57
K15	HHV8GK18_gp85	4.44516	4.65936e-08	4.10936e-07	K15
ORF75	HHV8GK18_gp86	4.40712	1.46919e-09	1.82312e-08	ORF75
ORF64	HHV8GK18_gp72	4.40528	3.18079e-10	4.5312e-09	ORF64
ORF61	HHV8GK18_gp66	4.29704	6.76621e-10	8.97336e-09	ORF61
K3	HHV8GK18_gp11	4.28248	1.14829e-07	9.16874e-07	K3
ORF11	HHV8GK18_gp08	4.26596	3.48068e-10	4.9241e-09	ORF11
ORF59	HHV8GK18_gp70	4.18687	4.91016e-10	6.72544e-09	ORF59
ORF67	HHV8GK18_gp74	4.13158	1.32572e-11	2.54217e-10	ORF67
ORF69	HHV8GK18_gp78	4.11578	1.92596e-11	3.60036e-10	ORF69
ORF10	HHV8GK18_gp07	4.10291	8.30018e-10	1.08101e-08	ORF10
K7	HHV8GK18_gp18	4.08919	2.24061e-08	2.12421e-07	K7
K8	HHV8GK18_gp54	4.07881	1.92648e-08	1.84998e-07	K8
MIR4537	100616422	4.06773	3.35607e-08	3.05431e-07	MIR4537
ORF24	HHV8GK18_gp27	4.0487	5.06528e-05	0.000218386	ORF24
vIRF-2	HHV8GK18_gp65	4.03252	2.98284e-08	2.7493e-07	vIRF-2
ORF68	HHV8GK18_gp77	3.9576	3.63801e-10	5.11719e-09	ORF68
ORF72	HHV8GK18_gp82	3.95577	3.59224e-09	4.09149e-08	ORF72
K13	HHV8GK18_gp80	3.94016	1.09971e-10	1.72585e-09	K13
ORF37	HHV8GK18_gp41	3.92677	1.15938e-08	1.17106e-07	ORF37
ORF43	HHV8GK18_gp45	3.87617	4.99064e-07	3.41118e-06	ORF43
ORF7	HHV8GK18_gp04	3.86067	7.89845e-08	6.54957e-07	ORF7
COL22A1	169044	3.84726	2.19728e-12	4.99372e-11	COL22A1
ORF44	HHV8GK18_gp47	3.84297	8.84541e-09	9.19181e-08	ORF44
ORF40	HHV8GK18_gp44	3.83245	7.68965e-09	8.09706e-08	ORF40
HMHB1	57824	3.82616	3.0011e-14	1.03313e-12	HMHB1
ORF36	HHV8GK18_gp40	3.80832	1.28314e-06	7.95722e-06	ORF36
K2	HHV8GK18_gp10	3.80624	3.00267e-07	2.15878e-06	K2
ORF33	HHV8GK18_gp37	3.77196	2.53332e-06	1.46238e-05	ORF33
ORF52	HHV8GK18_gp56	3.72961	2.75728e-06	1.58021e-05	ORF52
LINC01085	152742	3.67676	5.53141e-19	5.82697e-17	LINC01085
CLEC4M	10332	3.66192	4.3101e-09	4.82186e-08	CLEC4M
ORF49	HHV8GK18_gp53	3.65286	2.25491e-09	2.68804e-08	ORF49
ORF46	HHV8GK18_gp50	3.64281	2.12973e-10	3.15475e-09	ORF46
ORF45	HHV8GK18_gp51	3.62994	1.16657e-09	1.47595e-08	ORF45
ORF50	HHV8GK18_gp52	3.59322	1.49026e-12	3.54443e-11	ORF50
ORF48	HHV8GK18_gp48	3.58946	3.45471e-09	3.95134e-08	ORF48
ORF63	HHV8GK18_gp71	3.58241	2.7175e-05	0.000124652	ORF63
K12	HHV8GK18_gp79	3.56213	8.81939e-07	5.70714e-06	K12
ORF66	HHV8GK18_gp75	3.54976	8.85239e-09	9.19518e-08	ORF66
LINC01583	101929690	3.53412	5.12229e-10	6.98093e-09	LINC01583
ORF4	HHV8GK18_gp02	3.49348	1.6227e-05	7.83732e-05	ORF4
ORF27	HHV8GK18_gp31	3.47369	1.93323e-06	1.14838e-05	ORF27
ORF29	HHV8GK18_gp33	3.42489	1.18229e-06	7.3803e-06	ORF29
ORF17	HHV8GK18_gp20	3.42404	6.15136e-05	0.000259693	ORF17
ORF42	HHV8GK18_gp46	3.41033	2.91957e-06	1.66113e-05	ORF42
ORF54	HHV8GK18_gp58	3.40968	1.49505e-05	7.27665e-05	ORF54
IQCA1	79781	3.37824	8.35219e-15	3.26961e-13	IQCA1
ORF25	HHV8GK18_gp29	3.37433	1.95541e-05	9.26556e-05	ORF25
ORF74	HHV8GK18_gp84	3.36217	1.11125e-07	8.91357e-07	ORF74
CHAT	1103	3.34267	9.62096e-05	0.000386302	CHAT
NOS2	4843	3.30784	2.98281e-17	2.05079e-15	NOS2
ZP2	7783	3.29767	4.63062e-10	6.38531e-09	ZP2
ORF2	HHV8GK18_gp09	3.29532	1.51278e-07	1.17207e-06	ORF2
IGLL1	3543	3.27632	9.1003e-11	1.45335e-09	IGLL1
MIR4539	100616374	3.26903	3.11345e-05	0.000140606	MIR4539
vIRF-1	HHV8GK18_gp62	3.23123	2.39177e-06	1.39081e-05	vIRF-1
DMP1	1758	3.22646	0.000209833	0.000771704	DMP1
KCNF1	3754	3.22263	1.99445e-13	5.77967e-12	KCNF1
ESM1	11082	3.18411	9.30008e-08	7.58625e-07	ESM1
LINC01502	100130954	3.16449	1.00843e-06	6.41573e-06	LINC01502
ORF56	HHV8GK18_gp60	3.14843	7.14278e-06	3.74614e-05	ORF56
RFPL1	5988	3.13461	8.22152e-05	0.000336329	RFPL1
ORF47	HHV8GK18_gp49	3.11662	5.40999e-07	3.66616e-06	ORF47
IGFL1	374918	3.10983	3.75509e-07	2.63943e-06	IGFL1
IGLL5	100423062	3.10476	1.86369e-07	1.41099e-06	IGLL5
MDS2	259283	3.0951	1.33767e-11	2.5591e-10	MDS2
ORF62	HHV8GK18_gp69	3.07029	7.24889e-05	0.000301107	ORF62
EPYC	1833	3.06735	1.96818e-05	9.31888e-05	EPYC
JSRP1	126306	3.05463	1.29077e-10	1.99257e-09	JSRP1
PPEF1	5475	3.04641	2.31347e-15	1.0213e-13	PPEF1
ORF8	HHV8GK18_gp05	3.04459	6.28547e-05	0.000264853	ORF8
ACAN	176	3.02963	9.52935e-11	1.5139e-09	ACAN
ORF70	HHV8GK18_gp12	3.02455	0.000105646	0.000420544	ORF70
ORF26	HHV8GK18_gp30	3.0212	0.000219516	0.000803702	ORF26
LINC02685	221122	3.01484	0.000612794	0.00200174	LINC02685
CIBAR2	339145	3.00066	2.28056e-10	3.35184e-09	CIBAR2
LCN1	3933	2.94956	1.15313e-06	7.22583e-06	LCN1
DAND5	199699	2.94564	1.55701e-15	7.14333e-14	DAND5
SPIC	121599	2.94438	2.03154e-07	1.5263e-06	SPIC
ORF9	HHV8GK18_gp06	2.91875	3.72487e-06	2.07458e-05	ORF9
STC1	6781	2.89293	1.34265e-12	3.23093e-11	STC1
ORF22	HHV8GK18_gp26	2.88811	0.000173812	0.000653525	ORF22
TMEM233	387890	2.88008	7.45023e-18	5.91799e-16	TMEM233
ECEL1P2	347694	2.87848	1.20509e-05	6.00831e-05	ECEL1P2
MMP11	4320	2.87387	1.19662e-19	1.49852e-17	MMP11
K4.1	HHV8GK18_gp15	2.87349	0.00182661	0.00527709	K4.1
GRM8	2918	2.8631	5.46771e-08	4.74222e-07	GRM8
UNC5A	90249	2.86291	7.03106e-15	2.788e-13	UNC5A
RGS4	5999	2.86194	2.51581e-15	1.10072e-13	RGS4
HTN1	3346	2.86159	0.00190786	0.00548857	HTN1
MMP12	4321	2.82904	1.91184e-05	9.0854e-05	MMP12
FAM30A	9834	2.82819	1.29022e-07	1.0173e-06	FAM30A
ORF19	HHV8GK18_gp24	2.80633	0.00072561	0.00232538	ORF19
LOXHD1	125336	2.80554	6.99473e-17	4.32635e-15	LOXHD1
CEMIP	57214	2.80383	1.19202e-11	2.30198e-10	CEMIP
MMP1	4312	2.79605	7.74624e-07	5.08101e-06	MMP1
ORF32	HHV8GK18_gp36	2.79401	0.000277953	0.000990903	ORF32
TMEM235	283999	2.77039	4.73113e-07	3.25647e-06	TMEM235
CD5L	922	2.75929	2.08377e-06	1.228e-05	CD5L
WT1	7490	2.73924	2.53369e-05	0.000116919	WT1
LINC02408	100507175	2.71943	1.11524e-09	1.41612e-08	LINC02408
DSCAM	1826	2.70195	0.000164656	0.00062263	DSCAM
DERL3	91319	2.68941	3.55308e-16	1.92093e-14	DERL3
LRRC3B	116135	2.68647	1.32862e-06	8.20816e-06	LRRC3B
CD19	930	2.6674	5.70455e-14	1.86442e-12	CD19
SIGLEC12	89858	2.62825	9.5078e-09	9.81367e-08	SIGLEC12
PCDH17	27253	2.6282	6.06282e-12	1.2558e-10	PCDH17
FCRL5	83416	2.61543	8.8425e-07	5.72059e-06	FCRL5
GRAPL	400581	2.60661	6.85923e-18	5.50702e-16	GRAPL
ORF35	HHV8GK18_gp39	2.59369	0.00196963	0.00564642	ORF35
FCRL2	79368	2.59129	8.71981e-10	1.13123e-08	FCRL2
CD177	57126	2.57783	9.23404e-05	0.00037235	CD177
CNTNAP5	129684	2.56083	0.000103672	0.000413155	CNTNAP5
TDO2	6999	2.54265	1.52332e-08	1.501e-07	TDO2
ORF67A	HHV8GK18_gp73	2.5326	0.000393699	0.0013555	ORF67A
C4orf50	389197	2.53056	4.74624e-10	6.53126e-09	C4orf50
NLRP11	204801	2.52938	0.00755678	0.01833	NLRP11
FLT4	2324	2.5245	2.97263e-17	2.04953e-15	FLT4
C4B	721	2.52415	9.0863e-24	4.84833e-21	C4B
CACNA1E	777	2.5228	1.6437e-12	3.85703e-11	CACNA1E
NRXN3	9369	2.51637	1.57406e-17	1.15122e-15	NRXN3
SPAG4	6676	2.51051	8.44409e-18	6.57969e-16	SPAG4
ADAMDEC1	27299	2.49959	1.10837e-12	2.73416e-11	ADAMDEC1
OLR1	4973	2.49189	3.13041e-07	2.24666e-06	OLR1
PROX1	5629	2.48433	1.22734e-13	3.71916e-12	PROX1
LINC01558	26238	2.48097	9.51853e-16	4.60813e-14	LINC01558
CREG2	200407	2.47289	1.23276e-08	1.23553e-07	CREG2
ORF23	HHV8GK18_gp28	2.47186	0.0021525	0.00610152	ORF23
MZB1	51237	2.46561	8.61963e-07	5.59114e-06	MZB1
ALPG	251	2.46507	0.000347295	0.00121068	ALPG
MMP9	4318	2.45311	3.62973e-09	4.12662e-08	MMP9
ADAM19	8728	2.43958	1.00041e-21	2.50561e-19	ADAM19
CD38	952	2.4319	7.77737e-13	1.99473e-11	CD38
PMF1-BGLAP	100527963	2.4227	5.33608e-05	0.000229056	PMF1-BGLAP
CYP46A1	10858	2.39456	1.85959e-15	8.39037e-14	CYP46A1
ORF18	HHV8GK18_gp22	2.38405	0.0057868	0.0144759	ORF18
KCNQ3	3786	2.37785	2.18519e-14	7.68416e-13	KCNQ3
CXCR4	7852	2.37611	3.13394e-13	8.682e-12	CXCR4
IL13RA2	3598	2.37508	8.65079e-06	4.46548e-05	IL13RA2
MYLK2	85366	2.36686	4.40477e-10	6.09786e-09	MYLK2
CHST1	8534	2.3554	7.41511e-15	2.92141e-13	CHST1
COL18A1-AS1	378832	2.34038	1.24121e-06	7.72062e-06	COL18A1-AS1
KCNN3	3782	2.33982	2.70685e-19	3.06326e-17	KCNN3
UGT1A4	54657	2.33914	0.000935088	0.00292118	UGT1A4
GPRIN3	285513	2.33892	1.46682e-14	5.43855e-13	GPRIN3
UGT1A10	54575	2.33886	0.000606621	0.00198528	UGT1A10
C4A	720	2.32492	2.50682e-21	5.39735e-19	C4A
POU2AF1	5450	2.3009	5.43474e-07	3.67887e-06	POU2AF1
LINC01788	101927244	2.29996	3.49123e-07	2.46809e-06	LINC01788
ADCYAP1	116	2.29985	2.413e-05	0.000111918	ADCYAP1
CFAP54	144535	2.28134	7.17289e-10	9.45028e-09	CFAP54
LINC00525	84847	2.27843	1.17789e-07	9.37463e-07	LINC00525
LAX1	54900	2.27737	1.96297e-12	4.51981e-11	LAX1
ORF34	HHV8GK18_gp38	2.27218	0.0224262	0.047249	ORF34
GPR174	84636	2.27173	1.10853e-09	1.40979e-08	GPR174
TNR	7143	2.26721	7.21877e-05	0.000299957	TNR
ORF55	HHV8GK18_gp59	2.26685	0.00255031	0.00708276	ORF55
PCSK1	5122	2.26121	2.83454e-06	1.6195e-05	PCSK1
LY6H	4062	2.25863	0.000165578	0.000625827	LY6H
SPTA1	6708	2.25778	1.75357e-08	1.70057e-07	SPTA1
MIR503	574506	2.24102	8.66613e-06	4.47246e-05	MIR503
TCL1A	8115	2.22566	6.28233e-05	0.000264766	TCL1A
EYA1	2138	2.22007	8.53466e-08	7.02964e-07	EYA1
ST6GAL2	84620	2.2194	3.58197e-08	3.23709e-07	ST6GAL2
FILIP1	27145	2.21462	8.15379e-13	2.0804e-11	FILIP1
CXCL13	10563	2.21288	4.13948e-07	2.89057e-06	CXCL13
GPR45	11250	2.21061	3.56323e-09	4.06222e-08	GPR45
CHRNA7	1139	2.19787	2.44145e-09	2.89075e-08	CHRNA7
KCNN1	3780	2.1974	5.60469e-08	4.85074e-07	KCNN1
F2RL2	2151	2.19655	7.14524e-16	3.57918e-14	F2RL2
NUGGC	389643	2.19533	6.30081e-12	1.29852e-10	NUGGC
MIXL1	83881	2.18904	1.2468e-07	9.8617e-07	MIXL1
P4HA3	283208	2.1863	7.98632e-11	1.29133e-09	P4HA3
RASGRP3	25780	2.18451	1.29613e-15	6.07126e-14	RASGRP3
CPNE5	57699	2.17488	4.66029e-23	1.7598e-20	CPNE5
CD79A	973	2.17311	2.59001e-05	0.000119316	CD79A
KCNA3	3738	2.16549	7.36535e-14	2.33569e-12	KCNA3
PLA2G2D	26279	2.15915	1.1761e-05	5.88051e-05	PLA2G2D
LAMP5	24141	2.15749	1.53077e-14	5.61627e-13	LAMP5
FFAR3	2865	2.1473	1.02733e-05	5.20451e-05	FFAR3
AMPD1	270	2.14562	2.1128e-06	1.24242e-05	AMPD1
ORF53	HHV8GK18_gp57	2.14518	0.0101689	0.0237665	ORF53
CXCL9	4283	2.14248	5.89724e-10	7.94444e-09	CXCL9
C3orf36	80111	2.13917	5.55359e-11	9.33011e-10	C3orf36
COL4A1	1282	2.12813	1.21419e-13	3.68841e-12	COL4A1
THSD7A	221981	2.11779	3.36333e-14	1.14855e-12	THSD7A
SALRNA2	104548973	2.11286	3.63463e-06	2.02846e-05	SALRNA2
KLHL6	89857	2.10982	2.10351e-24	1.66551e-21	KLHL6
NETO2	81831	2.10613	2.46876e-15	1.08207e-13	NETO2
DUXAP8	503637	2.10574	2.08538e-08	1.99088e-07	DUXAP8
GABRD	2563	2.10216	6.89776e-11	1.134e-09	GABRD
BMP8A	353500	2.10041	1.87281e-21	4.21727e-19	BMP8A
UGT1A1	54658	2.09919	0.000121846	0.000476757	UGT1A1
ADAM12	8038	2.09528	6.78922e-15	2.71846e-13	ADAM12
AFAP1-AS1	84740	2.09506	5.11284e-15	2.10915e-13	AFAP1-AS1
GRAP	10750	2.09388	2.35496e-16	1.3048e-14	GRAP
HEYL	26508	2.09128	6.7625e-18	5.47461e-16	HEYL
ORF31	HHV8GK18_gp35	2.08684	0.0163533	0.0359413	ORF31
IL21R	50615	2.08078	2.74583e-21	5.86056e-19	IL21R
IGF2	3481	2.08009	1.99067e-06	1.17851e-05	IGF2
PRKCQ-AS1	439949	2.08006	1.17207e-11	2.27238e-10	PRKCQ-AS1
PALD1	27143	2.07125	2.53248e-28	8.87995e-25	PALD1
FDCSP	260436	2.07074	0.00179703	0.00520387	FDCSP
OPCML	4978	2.07004	1.75338e-08	1.70057e-07	OPCML
GRASLND	386597	2.06326	1.47602e-14	5.4644e-13	GRASLND
CTLA4	1493	2.06194	5.22945e-08	4.55166e-07	CTLA4
SSTR3	6753	2.04583	4.07403e-08	3.63493e-07	SSTR3
BRINP1	1620	2.04471	1.32308e-08	1.31798e-07	BRINP1
SDS	10993	2.04111	3.87842e-14	1.30278e-12	SDS
CHSY3	337876	2.03642	8.20623e-16	4.06092e-14	CHSY3
NALF1	728215	2.0351	4.49732e-11	7.74953e-10	NALF1
C19orf84	147646	2.03019	2.34164e-05	0.000108917	C19orf84
HCCAT5	283902	2.02302	1.19716e-06	7.45987e-06	HCCAT5
ZBP1	81030	2.0203	2.81481e-11	5.08011e-10	ZBP1
ANKRD36BP2	645784	2.01856	8.13135e-09	8.50318e-08	ANKRD36BP2
GPR142	350383	2.01817	2.35015e-06	1.36887e-05	GPR142
MS4A1	931	2.0157	4.81037e-05	0.000208127	MS4A1
TIE1	7075	2.01147	1.23337e-18	1.21093e-16	TIE1
ADAMTS7	11173	2.0049	1.49056e-13	4.43465e-12	ADAMTS7
SLC5A4	6527	2.00432	1.63119e-14	5.91397e-13	SLC5A4
CALCRL	10203	2.00071	2.65273e-09	3.11985e-08	CALCRL
TNFRSF13B	23495	2.00043	6.04486e-07	4.06831e-06	TNFRSF13B
MIAT	440823	1.99779	2.72573e-17	1.88992e-15	MIAT
XIRP1	165904	1.99571	6.17448e-09	6.6296e-08	XIRP1
HOATZ	399949	1.99474	4.32452e-06	2.38047e-05	HOATZ
DCHS2	54798	1.99426	6.17861e-08	5.28227e-07	DCHS2
CHRDL2	25884	1.99327	5.05844e-07	3.45175e-06	CHRDL2
NFIA-AS2	100996570	1.99141	3.15298e-08	2.89091e-07	NFIA-AS2
PIM2	11040	1.99092	7.767e-14	2.45671e-12	PIM2
CLEC6A	93978	1.9895	0.000761991	0.00243181	CLEC6A
LINC02538	401286	1.98606	3.98137e-08	3.56002e-07	LINC02538
ADAMTS4	9507	1.98596	2.94845e-08	2.71964e-07	ADAMTS4
COL11A1	1301	1.98527	2.05838e-05	9.70103e-05	COL11A1
FCRL1	115350	1.98515	7.87331e-06	4.09255e-05	FCRL1
KBTBD11	9920	1.98504	1.99843e-15	8.90228e-14	KBTBD11
ITGA9	3680	1.98249	9.51348e-16	4.60813e-14	ITGA9
GPR15	2838	1.97984	0.000200626	0.000741688	GPR15
DTHD1	401124	1.97069	9.27365e-09	9.5962e-08	DTHD1
JCHAIN	3512	1.9675	1.44205e-05	7.048e-05	JCHAIN
SEL1L3	23231	1.96001	1.18224e-18	1.16539e-16	SEL1L3
NLRP7	199713	1.95878	0.0082067	0.0197252	NLRP7
CCL21	6366	1.95851	2.98501e-09	3.46744e-08	CCL21
RET	5979	1.95419	2.39331e-15	1.05087e-13	RET
BCL6B	255877	1.93832	3.1253e-17	2.12495e-15	BCL6B
TNFRSF17	608	1.93618	2.12871e-05	0.000100075	TNFRSF17
LINC00494	284749	1.93526	0.000740018	0.00236815	LINC00494
PTCHD4	442213	1.93391	1.0544e-06	6.6788e-06	PTCHD4
LINC00689	154822	1.93389	0.000405845	0.00139282	LINC00689
CD27	939	1.93315	3.04991e-18	2.71232e-16	CD27
CAMK4	814	1.93308	3.05339e-15	1.31483e-13	CAMK4
DCC	1630	1.92689	1.02059e-06	6.48134e-06	DCC
K14	HHV8GK18_gp83	1.92482	0.0127554	0.028922	K14
FCGR3A	2214	1.9233	1.64126e-09	2.01021e-08	FCGR3A
SEMA7A	8482	1.92229	3.40213e-12	7.44254e-11	SEMA7A
SLAMF7	57823	1.92111	1.14735e-14	4.36616e-13	SLAMF7
ADAMTS14	140766	1.918	9.32699e-13	2.35042e-11	ADAMTS14
ROR1-AS1	101927034	1.91568	2.57055e-06	1.48108e-05	ROR1-AS1
SGIP1	84251	1.91564	2.78585e-13	7.7531e-12	SGIP1
TMEM26	219623	1.91235	7.84886e-08	6.51506e-07	TMEM26
PRR29-AS1	400612	1.91045	1.20032e-09	1.51398e-08	PRR29-AS1
COL10A1	1300	1.91024	2.30029e-07	1.70782e-06	COL10A1
UTS2R	2837	1.90852	0.000225885	0.00082442	UTS2R
DLL4	54567	1.908	6.65769e-16	3.3763e-14	DLL4
SMIM43	132332	1.90623	2.14989e-06	1.26182e-05	SMIM43
SCN9A	6335	1.90582	1.66257e-09	2.03429e-08	SCN9A
INSRR	3645	1.90144	5.5288e-08	4.79182e-07	INSRR
SPIB	6689	1.89715	3.05857e-10	4.36977e-09	SPIB
IKZF3	22806	1.89655	2.19938e-12	4.99388e-11	IKZF3
IL21-AS1	100996941	1.8951	0.000582072	0.0019136	IL21-AS1
ISL2	64843	1.89464	5.20182e-05	0.000223723	ISL2
P2RX5	5026	1.89145	2.83237e-09	3.30578e-08	P2RX5
GRIK3	2899	1.88963	2.91788e-07	2.10893e-06	GRIK3
LINC02245	400958	1.8885	0.000190536	0.000708164	LINC02245
ITPK1-AS1	319085	1.88744	0.000281638	0.00100287	ITPK1-AS1
TMEM156	80008	1.88722	5.66515e-11	9.48507e-10	TMEM156
CHST15	51363	1.88645	4.35732e-27	7.63931e-24	CHST15
CCDC26	728724	1.8814	0.00339237	0.00908122	CCDC26
NTRK1	4914	1.88102	3.27293e-09	3.76624e-08	NTRK1
ADGRG5	221188	1.8797	1.7304e-13	5.09875e-12	ADGRG5
CHRFAM7A	89832	1.87811	7.53573e-11	1.22737e-09	CHRFAM7A
P2RY8	286530	1.87727	9.51202e-16	4.60813e-14	P2RY8
MIR6727	102465435	1.87668	0.00987681	0.0231743	MIR6727
CD80	941	1.87387	5.60239e-13	1.47861e-11	CD80
CLDN14	23562	1.87287	1.66658e-05	8.02554e-05	CLDN14
PCDH12	51294	1.87019	2.0262e-12	4.63929e-11	PCDH12
VASH1	22846	1.86991	7.24024e-20	9.76438e-18	VASH1
TMEM244	253582	1.86933	0.000157563	0.000599038	TMEM244
FMNL3	91010	1.86293	9.3408e-26	9.17079e-23	FMNL3
CXCR5	643	1.86168	1.83657e-08	1.77335e-07	CXCR5
COL4A2	1284	1.86136	1.57508e-12	3.71167e-11	COL4A2
AOAH-IT1	100874264	1.85964	0.00267653	0.00738566	AOAH-IT1
SNCB	6620	1.85787	2.54307e-06	1.46732e-05	SNCB
LINC01993	100996291	1.85653	0.000246244	0.00089014	LINC01993
GVINP1	387751	1.85316	5.66369e-16	2.93901e-14	GVINP1
GBP5	115362	1.85246	1.49319e-12	3.54794e-11	GBP5
DAZL	1618	1.85211	0.000151334	0.000578583	DAZL
FCRL3	115352	1.8412	5.89464e-08	5.06065e-07	FCRL3
TIGIT	201633	1.8362	1.01893e-13	3.16176e-12	TIGIT
TNFRSF9	3604	1.83486	5.53462e-13	1.46387e-11	TNFRSF9
CD8A	925	1.83133	8.96886e-13	2.26949e-11	CD8A
CD300LF	146722	1.82656	3.79365e-09	4.28904e-08	CD300LF
PGM2L1	283209	1.82451	1.87134e-13	5.4551e-12	PGM2L1
SV2B	9899	1.82418	1.38446e-11	2.64654e-10	SV2B
NEK10	152110	1.82398	2.04715e-09	2.47158e-08	NEK10
PNOC	5368	1.82062	9.85618e-07	6.2869e-06	PNOC
SLAMF6	114836	1.81925	1.36939e-12	3.2824e-11	SLAMF6
CXCR3	2833	1.815	4.68448e-14	1.54752e-12	CXCR3
LRRC14B	389257	1.81457	0.000113278	0.000446438	LRRC14B
MAGED4	728239	1.81341	1.70677e-14	6.11572e-13	MAGED4
IFNG-AS1	100885789	1.81312	0.00091479	0.00286287	IFNG-AS1
GABRR2	2570	1.80931	8.82771e-12	1.7616e-10	GABRR2
TGFB3	7043	1.80903	1.7419e-16	9.89695e-15	TGFB3
TNFSF18	8995	1.80538	0.000136271	0.000526653	TNFSF18
ITK	3702	1.80354	1.31838e-13	3.9705e-12	ITK
FCMR	9214	1.80195	2.13174e-13	6.13405e-12	FCMR
CCL1	6346	1.80054	0.000439099	0.00149399	CCL1
LINC00582	100287814	1.79938	3.74247e-06	2.08344e-05	LINC00582
CCR5	1234	1.79767	2.21727e-13	6.35041e-12	CCR5
IL24	11009	1.79624	1.54142e-06	9.37879e-06	IL24
HMGA2	8091	1.79224	2.47197e-06	1.43202e-05	HMGA2
UNC45B	146862	1.79222	6.66544e-07	4.4385e-06	UNC45B
MIR3125	100422986	1.78929	5.16177e-05	0.000222195	MIR3125
SIRPG-AS1	101929010	1.78874	2.45742e-05	0.000113742	SIRPG-AS1
EOMES	8320	1.78652	8.3564e-11	1.34497e-09	EOMES
TENT5C	54855	1.78637	6.27962e-10	8.38923e-09	TENT5C
JAK3	3718	1.78612	6.01192e-17	3.78365e-15	JAK3
JAKMIP1	152789	1.78492	7.97453e-12	1.60966e-10	JAKMIP1
SLC26A4	5172	1.78356	1.10677e-08	1.12487e-07	SLC26A4
FAM225A	286333	1.78352	6.20606e-16	3.19511e-14	FAM225A
ANKRD18DP	348840	1.78191	0.000142435	0.000547029	ANKRD18DP
AGBL1	123624	1.77984	0.0002022	0.00074699	AGBL1
MIR5587	100847028	1.7785	4.61007e-06	2.52059e-05	MIR5587
ITGA4	3676	1.77654	1.54076e-12	3.64685e-11	ITGA4
DCSTAMP	81501	1.76945	0.000474254	0.00159525	DCSTAMP
SULF1	23213	1.76876	2.13868e-10	3.16418e-09	SULF1
KIF21B	23046	1.76852	4.66076e-17	3.01049e-15	KIF21B
KCNJ10	3766	1.76794	5.62347e-08	4.86186e-07	KCNJ10
TGM2	7052	1.76779	6.58143e-12	1.35181e-10	TGM2
MIR3667HG	348645	1.76765	2.51721e-12	5.6373e-11	MIR3667HG
PRR5L	79899	1.76667	1.40508e-20	2.26892e-18	PRR5L
SLFN12L	100506736	1.76631	5.55006e-13	1.46637e-11	SLFN12L
MIR3186	100422944	1.76562	7.11134e-05	0.000295944	MIR3186
ETS1	2113	1.76417	1.09893e-19	1.39758e-17	ETS1
LINC00861	100130231	1.7578	1.02832e-09	1.31275e-08	LINC00861
SLA2	84174	1.75153	1.12972e-19	1.42933e-17	SLA2
LINC01060	401164	1.75082	0.000621047	0.00202519	LINC01060
MC4R	4160	1.74948	0.00492142	0.0125411	MC4R
ICOS	29851	1.74731	2.52972e-10	3.66541e-09	ICOS
LINC01235	401492	1.7468	7.28618e-06	3.81483e-05	LINC01235
FASLG	356	1.74646	2.51439e-10	3.6475e-09	FASLG
SIGLEC10	89790	1.74619	1.57423e-14	5.74138e-13	SIGLEC10
EXOC3L2	90332	1.74473	6.49334e-18	5.29498e-16	EXOC3L2
P2RY10	27334	1.7424	4.91948e-12	1.03779e-10	P2RY10
AIM2	9447	1.74235	5.7591e-12	1.19693e-10	AIM2
MMP16	4325	1.73863	2.1917e-09	2.62032e-08	MMP16
IRF4	3662	1.73605	1.47093e-10	2.24807e-09	IRF4
SNORD48	26801	1.7338	0.00892336	0.0212541	SNORD48
NID2	22795	1.72778	2.00205e-11	3.72839e-10	NID2
FAM205A	259308	1.7264	4.62275e-06	2.5265e-05	FAM205A
FCGR1A	2209	1.72571	2.07961e-09	2.50216e-08	FCGR1A
SIGLEC7	27036	1.72569	2.05193e-07	1.53973e-06	SIGLEC7
CD93	22918	1.72547	4.26405e-17	2.79191e-15	CD93
DYSF	8291	1.72546	8.5527e-13	2.1709e-11	DYSF
GPR137C	283554	1.72386	9.74589e-11	1.54612e-09	GPR137C
PDCD1	5133	1.72383	2.10282e-07	1.57647e-06	PDCD1
MAGED4B	81557	1.72297	5.81818e-13	1.53227e-11	MAGED4B
FCGR3B	2215	1.71714	9.85818e-12	1.94822e-10	FCGR3B
PRKCQ	5588	1.71656	7.58459e-19	7.82201e-17	PRKCQ
TNFSF4	7292	1.71596	2.27759e-10	3.35184e-09	TNFSF4
PIEZO2	63895	1.71543	1.08144e-08	1.10141e-07	PIEZO2
CCL11	6356	1.71425	0.00124069	0.00375126	CCL11
PROB1	389333	1.71339	1.3234e-18	1.289e-16	PROB1
CD200	4345	1.70776	9.7217e-14	3.03336e-12	CD200
TBXA2R	6915	1.70365	1.89332e-10	2.83709e-09	TBXA2R
KCNIP1	30820	1.70361	1.18123e-09	1.4922e-08	KCNIP1
MEI1	150365	1.70249	1.99831e-12	4.58396e-11	MEI1
LAYN	143903	1.70145	1.58843e-12	3.73448e-11	LAYN
KCNN2	3781	1.69938	2.76218e-12	6.14109e-11	KCNN2
BHLHA15	168620	1.69911	2.19379e-06	1.28451e-05	BHLHA15
TMEM92	162461	1.69555	6.72892e-13	1.74959e-11	TMEM92
PGF	5228	1.69437	3.40212e-16	1.85567e-14	PGF
CHRNB4	1143	1.6913	2.47437e-06	1.43273e-05	CHRNB4
CCDC102B	79839	1.69014	5.18335e-11	8.78022e-10	CCDC102B
CD226	10666	1.68395	1.39173e-14	5.19147e-13	CD226
TREML4	285852	1.68027	0.000777562	0.00247667	TREML4
PTP4A3	11156	1.67931	5.11329e-13	1.36568e-11	PTP4A3
LINC00996	285972	1.67676	2.71397e-07	1.97845e-06	LINC00996
GLIS3	169792	1.67469	1.55268e-19	1.90553e-17	GLIS3
ST8SIA4	7903	1.67279	1.87978e-12	4.35686e-11	ST8SIA4
SCN3A	6328	1.66882	2.04884e-05	9.66533e-05	SCN3A
THEMIS	387357	1.66754	8.12797e-07	5.31719e-06	THEMIS
CILP2	148113	1.66371	1.29835e-07	1.02305e-06	CILP2
FNDC1	84624	1.6631	1.29553e-05	6.402e-05	FNDC1
TSPEAR	54084	1.66037	1.26602e-05	6.28021e-05	TSPEAR
ZNF831	128611	1.66012	1.33549e-12	3.21685e-11	ZNF831
MIR9-1HG	10485	1.65717	1.13611e-06	7.1301e-06	MIR9-1HG
IDO1	3620	1.64952	1.74282e-10	2.63246e-09	IDO1
UBASH3A	53347	1.64879	2.19284e-11	4.0499e-10	UBASH3A
FCGR1CP	100132417	1.64683	7.75588e-08	6.45097e-07	FCGR1CP
POSTN	10631	1.64569	7.41528e-09	7.83842e-08	POSTN
HSH2D	84941	1.64514	4.28329e-12	9.14999e-11	HSH2D
SH2D3C	10044	1.64327	7.148e-18	5.71491e-16	SH2D3C
TSPAN18	90139	1.6425	3.00894e-15	1.30255e-13	TSPAN18
PCED1B-AS1	100233209	1.64149	4.90126e-15	2.03212e-13	PCED1B-AS1
PXDN	7837	1.63957	4.87257e-10	6.68514e-09	PXDN
CR2	1380	1.63863	0.000925149	0.00289161	CR2
ZNF80	7634	1.63601	5.21594e-06	2.8218e-05	ZNF80
SH2D1A	4068	1.63574	3.33022e-08	3.03529e-07	SH2D1A
FNDC9	408263	1.63411	0.0020304	0.00579626	FNDC9
ADAM28	10863	1.62995	3.91221e-13	1.0634e-11	ADAM28
AOAH	313	1.6273	4.58471e-12	9.72617e-11	AOAH
CYP26C1	340665	1.62614	0.000228029	0.000831506	CYP26C1
LRRN2	10446	1.62594	4.72169e-07	3.25088e-06	LRRN2
VWA5B2	90113	1.62466	2.09159e-06	1.232e-05	VWA5B2
CEMIP2	23670	1.62442	6.51682e-17	4.05978e-15	CEMIP2
CARD11	84433	1.62436	1.48381e-14	5.48495e-13	CARD11
NRP2	8828	1.62428	1.90969e-13	5.55372e-12	NRP2
PPP1R16B	26051	1.62344	1.3035e-15	6.09419e-14	PPP1R16B
RAB39B	116442	1.62291	3.71085e-09	4.209e-08	RAB39B
CD96	10225	1.61706	5.43483e-12	1.13627e-10	CD96
FRMPD3	84443	1.61668	2.39842e-10	3.50411e-09	FRMPD3
FCGR1BP	2210	1.61063	3.68916e-09	4.18827e-08	FCGR1BP
UNC13A	23025	1.61004	6.72692e-07	4.47459e-06	UNC13A
GFI1	2672	1.60759	1.91404e-13	5.55977e-12	GFI1
NOVA2	4858	1.60742	2.34058e-13	6.64156e-12	NOVA2
SCT	6343	1.60646	5.01242e-05	0.000216411	SCT
SALL4	57167	1.60545	2.15545e-05	0.000101164	SALL4
EXOC3L1	283849	1.60053	1.12464e-17	8.49359e-16	EXOC3L1
HEY1	23462	1.59951	5.33638e-16	2.77503e-14	HEY1
GPR31	2853	1.59902	0.00269297	0.00742769	GPR31
TNFAIP8L1	126282	1.5981	8.0713e-21	1.34769e-18	TNFAIP8L1
VAT1L	57687	1.5973	0.00262996	0.00728049	VAT1L
NINL	22981	1.59538	5.3225e-15	2.19196e-13	NINL
ITGAL	3683	1.59416	6.13379e-12	1.26729e-10	ITGAL
CHST11	50515	1.59397	3.58872e-20	5.15118e-18	CHST11
SCG2	7857	1.59378	0.00108186	0.00332386	SCG2
GIPC3	126326	1.59332	8.1384e-12	1.64004e-10	GIPC3
MEF2B	4207	1.5924	0.00487625	0.0124377	MEF2B
TNIP3	79931	1.59181	2.63631e-07	1.93044e-06	TNIP3
ERFE	151176	1.59073	3.75666e-05	0.000166529	ERFE
HTRA4	203100	1.58836	1.24529e-08	1.24554e-07	HTRA4
SLAMF1	6504	1.58782	2.0662e-11	3.84203e-10	SLAMF1
LY9	4063	1.58666	2.46881e-12	5.53904e-11	LY9
TMEM255B	348013	1.58561	1.20734e-14	4.5591e-13	TMEM255B
SCML4	256380	1.5846	4.28305e-11	7.40405e-10	SCML4
KLRK1	22914	1.58433	3.60945e-05	0.000160788	KLRK1
NID1	4811	1.58331	5.52781e-11	9.29316e-10	NID1
CDH26	60437	1.58216	1.92962e-14	6.8443e-13	CDH26
OR4D6	219983	1.58209	0.0131449	0.02969	OR4D6
PTPRC	5788	1.57961	4.70647e-11	8.05581e-10	PTPRC
ENPEP	2028	1.57582	2.70135e-09	3.17095e-08	ENPEP
LINC01163	101927381	1.57533	0.00528819	0.0133661	LINC01163
RELN	5649	1.5738	1.04676e-05	5.29313e-05	RELN
IFNG	3458	1.57341	5.75392e-05	0.000244766	IFNG
SFTA1P	207107	1.57175	0.000385446	0.00133026	SFTA1P
HECW2	57520	1.57174	1.96391e-16	1.10814e-14	HECW2
PAX5	5079	1.56886	0.000305446	0.00107935	PAX5
FSCN1	6624	1.56706	9.39549e-19	9.49021e-17	FSCN1
GPR4	2828	1.56644	1.66631e-10	2.52622e-09	GPR4
TXNDC5	81567	1.56571	1.40372e-11	2.67918e-10	TXNDC5
LINC00943	100507206	1.56491	0.00017406	0.000654259	LINC00943
CXCL10	3627	1.56146	7.01372e-05	0.000292427	CXCL10
FYB1	2533	1.56043	9.64812e-12	1.91287e-10	FYB1
ANKRD44-IT1	101927547	1.56005	0.000111026	0.000438688	ANKRD44-IT1
ART1	417	1.55895	0.000345496	0.00120526	ART1
KLHL3	26249	1.55821	1.51102e-20	2.40831e-18	KLHL3
COL6A3	1293	1.55582	3.1834e-11	5.65796e-10	COL6A3
ALPK3	57538	1.55568	2.46078e-09	2.90943e-08	ALPK3
DYRK3	8444	1.555	6.5176e-14	2.09515e-12	DYRK3
ADD2	119	1.55484	1.91676e-06	1.13998e-05	ADD2
FAM225B	100128385	1.55209	8.64217e-11	1.38563e-09	FAM225B
IL7R	3575	1.55106	1.33407e-08	1.32785e-07	IL7R
LINC00839	84856	1.5508	3.02168e-12	6.66971e-11	LINC00839
CNR2	1269	1.55038	7.6514e-05	0.000315647	CNR2
NYAP2	57624	1.55017	9.03484e-05	0.000364677	NYAP2
LOXL2	4017	1.54652	2.16486e-12	4.92461e-11	LOXL2
MIR3176	100423037	1.54358	5.03924e-05	0.000217378	MIR3176
C16orf54	283897	1.54329	1.30549e-11	2.50927e-10	C16orf54
F2RL3	9002	1.54083	1.163e-05	5.82332e-05	F2RL3
SEMA3A	10371	1.54075	9.57126e-06	4.88819e-05	SEMA3A
MIR551A	693135	1.5407	0.0185609	0.040185	MIR551A
CD22	933	1.53931	1.24889e-06	7.76446e-06	CD22
MIR6132	102466616	1.53451	6.87014e-05	0.000287172	MIR6132
FCRLA	84824	1.53379	1.29962e-06	8.04516e-06	FCRLA
GPR171	29909	1.53323	1.27819e-09	1.60723e-08	GPR171
GZMK	3003	1.53246	2.52878e-07	1.86002e-06	GZMK
KALRN	8997	1.53228	5.17615e-24	3.17622e-21	KALRN
TNFRSF4	7293	1.53006	1.85601e-08	1.79001e-07	TNFRSF4
UTS2	10911	1.52925	0.000101951	0.00040676	UTS2
NME1-NME2	654364	1.52558	0.019611	0.0421388	NME1-NME2
MIR6774	102466732	1.52524	0.0115706	0.0265837	MIR6774
CCR7	1236	1.5248	2.43945e-10	3.55138e-09	CCR7
LCK	3932	1.52369	2.41984e-11	4.42255e-10	LCK
HS3ST3A1	9955	1.5236	1.45481e-14	5.40216e-13	HS3ST3A1
OLFML2B	25903	1.52325	1.42954e-09	1.78022e-08	OLFML2B
CXCR6	10663	1.51751	1.26371e-13	3.81991e-12	CXCR6
BFSP2	8419	1.51718	0.000135274	0.000523591	BFSP2
KCNJ6	3763	1.51647	0.00194348	0.00558188	KCNJ6
KBTBD11-AS1	101928058	1.51599	0.000868549	0.00273174	KBTBD11-AS1
OR51E1	143503	1.5158	5.71232e-06	3.05999e-05	OR51E1
MMP13	4322	1.51492	0.00149381	0.00442019	MMP13
PKD2L1	9033	1.51492	6.38862e-05	0.000268764	PKD2L1
DOCK10	55619	1.50896	1.53071e-18	1.46192e-16	DOCK10
ADA2	51816	1.50882	6.33161e-14	2.04486e-12	ADA2
C3orf80	401097	1.5077	1.40101e-07	1.09515e-06	C3orf80
SALRNA3	104548972	1.50752	0.00806126	0.0194174	SALRNA3
KCNK17	89822	1.50745	0.00292736	0.007988	KCNK17
PLXDC1	57125	1.50661	9.4364e-13	2.37312e-11	PLXDC1
CHRNA6	8973	1.50425	0.0030711	0.00832653	CHRNA6
MIR4324	100422979	1.50268	0.00344105	0.00918728	MIR4324
CAVIN4	347273	1.50218	6.52147e-14	2.09515e-12	CAVIN4
NIBAN3	199786	1.50217	2.70623e-08	2.51894e-07	NIBAN3
RASAL3	64926	1.5021	1.52894e-12	3.62588e-11	RASAL3
CDYL2	124359	1.49939	5.65368e-21	1.01292e-18	CDYL2
COL15A1	1306	1.49881	2.4989e-11	4.54673e-10	COL15A1
RBM14-RBM4	100526737	1.49867	0.0232266	0.0486472	RBM14-RBM4
CD2	914	1.4986	1.27055e-09	1.59845e-08	CD2
ADM2	79924	1.49823	5.08285e-08	4.44139e-07	ADM2
SPSB4	92369	1.49581	9.31618e-06	4.76586e-05	SPSB4
MIR4649	100616346	1.49489	0.0110695	0.0256105	MIR4649
SIRPG	55423	1.4947	6.15651e-10	8.25295e-09	SIRPG
LEF1-AS1	641518	1.49349	3.97473e-08	3.55668e-07	LEF1-AS1
STARD4-AS1	100505678	1.49342	4.8164e-08	4.23571e-07	STARD4-AS1
TAGAP	117289	1.49268	5.27296e-14	1.72797e-12	TAGAP
CDCP2	200008	1.4925	8.86928e-06	4.56578e-05	CDCP2
DOCK8	81704	1.48943	4.1237e-20	5.81703e-18	DOCK8
SV2A	9900	1.48919	1.87915e-11	3.5209e-10	SV2A
CCL5	6352	1.48875	5.00665e-09	5.50574e-08	CCL5
LYPD1	116372	1.48874	9.65867e-07	6.17536e-06	LYPD1
ELOVL2	54898	1.48862	9.71244e-07	6.20651e-06	ELOVL2
CALHM6	441168	1.48711	2.77999e-09	3.25083e-08	CALHM6
CLEC17A	388512	1.48574	0.000392211	0.00135132	CLEC17A
CRTAM	56253	1.48465	1.30155e-07	1.0246e-06	CRTAM
SCAMP5	192683	1.48447	1.94467e-09	2.35946e-08	SCAMP5
CD3G	917	1.48381	1.62906e-09	1.99827e-08	CD3G
COL8A1	1295	1.48364	4.15231e-07	2.89788e-06	COL8A1
BGN	633	1.4823	1.82241e-10	2.74244e-09	BGN
SEMA6B	10501	1.48185	3.63442e-10	5.11719e-09	SEMA6B
TLR10	81793	1.48184	6.5229e-07	4.35422e-06	TLR10
SELL	6402	1.48167	4.63408e-11	7.95409e-10	SELL
LILRA4	23547	1.48046	0.000676552	0.0021827	LILRA4
TNC	3371	1.48037	1.03496e-09	1.32033e-08	TNC
LZTS1	11178	1.47821	3.1814e-17	2.15711e-15	LZTS1
KDR	3791	1.47602	2.45877e-11	4.48036e-10	KDR
NLRC3	197358	1.47566	4.85186e-16	2.54463e-14	NLRC3
COL4A4	1286	1.47479	1.27436e-06	7.91076e-06	COL4A4
ELFN1	392617	1.4743	2.52822e-12	5.6568e-11	ELFN1
NCR1	9437	1.47278	0.00886622	0.0211324	NCR1
TRPC4	7223	1.47132	4.17387e-06	2.3022e-05	TRPC4
PPIAL4F	728945	1.47061	0.00536421	0.0135388	PPIAL4F
SH2B3	10019	1.47026	7.1814e-18	5.72297e-16	SH2B3
SLC6A17	388662	1.46927	6.01779e-13	1.57975e-11	SLC6A17
SLCO2A1	6578	1.46891	1.04249e-13	3.22267e-12	SLCO2A1
SAMD3	154075	1.4687	1.0033e-09	1.28461e-08	SAMD3
CCL25	6370	1.46695	0.00209049	0.00594427	CCL25
CDH5	1003	1.46434	3.44484e-11	6.06119e-10	CDH5
ZFP92	139735	1.46008	1.83435e-12	4.25961e-11	ZFP92
CD3E	916	1.45966	5.62102e-11	9.41761e-10	CD3E
FAM106A	80039	1.45935	0.000501459	0.00167665	FAM106A
ARPIN-AP3S2	100526783	1.45872	0.0108548	0.025192	ARPIN-AP3S2
LYZ	4069	1.45733	7.77017e-08	6.46066e-07	LYZ
GPR141	353345	1.45716	3.55908e-10	5.02633e-09	GPR141
FKBP11	51303	1.4566	3.33821e-17	2.2572e-15	FKBP11
CD180	4064	1.4556	4.21118e-07	2.9318e-06	CD180
ARX	170302	1.45465	0.0163152	0.0358661	ARX
SERPINB9	5272	1.45006	2.14126e-16	1.19721e-14	SERPINB9
DNAJC12	56521	1.44957	5.40227e-06	2.90978e-05	DNAJC12
TRG-AS1	100506776	1.44917	9.49163e-11	1.50986e-09	TRG-AS1
IKZF1	10320	1.44839	7.3082e-15	2.88856e-13	IKZF1
PODXL	5420	1.4465	6.97955e-14	2.23064e-12	PODXL
PLXNC1	10154	1.44495	8.96628e-19	9.20826e-17	PLXNC1
KCNH1	3756	1.44385	7.27062e-09	7.69876e-08	KCNH1
CD72	971	1.44367	1.32339e-11	2.53969e-10	CD72
CEACAM21	90273	1.44251	4.83946e-08	4.2499e-07	CEACAM21
CGAS	115004	1.44139	1.93331e-18	1.79069e-16	CGAS
STK32B	55351	1.44125	2.5771e-10	3.72965e-09	STK32B
KLRG1	10219	1.43917	2.39101e-08	2.25287e-07	KLRG1
FHAD1	114827	1.43856	2.2819e-10	3.35184e-09	FHAD1
BTBD17	388419	1.43856	0.00236878	0.00663567	BTBD17
ANGPT2	285	1.4363	1.11975e-08	1.13571e-07	ANGPT2
SAMD11	148398	1.43456	2.45791e-08	2.31324e-07	SAMD11
PYHIN1	149628	1.4341	3.93047e-08	3.52092e-07	PYHIN1
CHN1	1123	1.43307	1.32565e-12	3.19627e-11	CHN1
RTP5	285093	1.43297	0.00538853	0.0135904	RTP5
MADD-AS1	101928943	1.43276	0.000921229	0.00288045	MADD-AS1
ADGRE2	30817	1.43195	1.746e-17	1.27168e-15	ADGRE2
BCORP1	286554	1.43167	0.002664	0.00735769	BCORP1
TREML2	79865	1.43039	3.4887e-07	2.46701e-06	TREML2
ITGA1	3672	1.42995	3.89972e-07	2.73482e-06	ITGA1
ZNF215	7762	1.42912	1.56922e-07	1.21197e-06	ZNF215
TSPAN11	441631	1.42877	4.67207e-11	8.01369e-10	TSPAN11
RHOH	399	1.42798	3.65091e-11	6.40083e-10	RHOH
RGS17	26575	1.42773	5.23606e-08	4.55418e-07	RGS17
GNGT2	2793	1.42624	6.25735e-16	3.21311e-14	GNGT2
NRXN2	9379	1.42588	2.28395e-11	4.19923e-10	NRXN2
TTC24	164118	1.42554	2.27153e-05	0.000106078	TTC24
RHOJ	57381	1.42545	1.67047e-14	6.01153e-13	RHOJ
LINC02912	641384	1.42511	0.00449971	0.0115941	LINC02912
ADGRF5	221395	1.42475	1.22687e-08	1.23063e-07	ADGRF5
GJA5	2702	1.42461	1.08688e-07	8.74099e-07	GJA5
CHRNA1	1134	1.42417	0.00477471	0.012207	CHRNA1
PIF1	80119	1.42405	9.03503e-13	2.28388e-11	PIF1
ARAP3	64411	1.42289	1.80143e-14	6.41744e-13	ARAP3
SLAMF8	56833	1.42235	7.73407e-17	4.74877e-15	SLAMF8
SH2D2A	9047	1.42228	5.51667e-11	9.28716e-10	SH2D2A
RGS3	5998	1.41605	1.85697e-20	2.83101e-18	RGS3
CD5	921	1.41595	4.59066e-12	9.73038e-11	CD5
CSNK1G2-AS1	255193	1.41325	0.000491057	0.00164681	CSNK1G2-AS1
ST6GAL1	6480	1.41266	7.80513e-18	6.1799e-16	ST6GAL1
RCSD1	92241	1.4123	8.08315e-13	2.06668e-11	RCSD1
LYN	4067	1.40777	1.09246e-15	5.23158e-14	LYN
PIK3CG	5294	1.40756	5.74204e-12	1.19439e-10	PIK3CG
HMOX1	3162	1.40586	1.58147e-08	1.55083e-07	HMOX1
PARP15	165631	1.40429	4.70185e-10	6.47626e-09	PARP15
LINC00528	200298	1.40402	5.00693e-10	6.8389e-09	LINC00528
GBP1	2633	1.40342	5.54566e-15	2.26486e-13	GBP1
LCP2	3937	1.40284	1.17353e-15	5.58222e-14	LCP2
HSPG2	3339	1.40239	1.74326e-12	4.06733e-11	HSPG2
ZFR2	23217	1.40162	0.000125172	0.000487983	ZFR2
LTB	4050	1.40145	2.32069e-05	0.000108148	LTB
SPRY4	81848	1.39983	1.15294e-11	2.23883e-10	SPRY4
RPS6KA2-IT1	100874353	1.39872	2.05221e-05	9.67752e-05	RPS6KA2-IT1
HAPLN3	145864	1.39566	7.73976e-14	2.45126e-12	HAPLN3
CASP4LP	643733	1.3954	3.13216e-07	2.24726e-06	CASP4LP
SFMBT2	57713	1.39371	1.87492e-15	8.44402e-14	SFMBT2
CCNYL2	414194	1.39135	0.0159408	0.0351258	CCNYL2
CCL4	6351	1.38401	7.27774e-07	4.8084e-06	CCL4
PMCH	5367	1.38392	0.0106066	0.0246907	PMCH
NR2F1	7025	1.3832	2.80459e-08	2.60358e-07	NR2F1
MROH9	80133	1.38239	0.00264626	0.00731857	MROH9
FCRL6	343413	1.38223	1.75204e-08	1.70042e-07	FCRL6
FN1	2335	1.38162	1.24713e-07	9.8617e-07	FN1
ADAMTS12	81792	1.38159	5.09337e-08	4.449e-07	ADAMTS12
FSD1	79187	1.38137	0.000942384	0.00294173	FSD1
SLCO5A1	81796	1.38026	9.91468e-08	8.0236e-07	SLCO5A1
SHROOM4	57477	1.3802	8.54801e-15	3.33563e-13	SHROOM4
COL24A1	255631	1.37966	5.31786e-09	5.81314e-08	COL24A1
UNC5B	219699	1.37939	1.59529e-14	5.80094e-13	UNC5B
DOK3	79930	1.37921	8.75526e-14	2.74454e-12	DOK3
PRDM8	56978	1.37836	5.66099e-07	3.82358e-06	PRDM8
PREX1	57580	1.37835	3.88135e-17	2.5748e-15	PREX1
PCSK6	5046	1.37801	4.95824e-13	1.33151e-11	PCSK6
CARMIL2	146206	1.37712	6.54716e-10	8.71476e-09	CARMIL2
TRPA1	8989	1.37647	0.000176672	0.000662958	TRPA1
GZMB	3002	1.37422	1.60322e-08	1.57027e-07	GZMB
ZBTB32	27033	1.37416	8.30189e-10	1.08101e-08	ZBTB32
LANA	HHV8GK18_gp81	1.37366	0.00321715	0.0086746	LANA
CYTIP	9595	1.37102	1.04488e-11	2.05666e-10	CYTIP
CERKL	375298	1.37072	1.48823e-07	1.15414e-06	CERKL
GP9	2815	1.3694	0.00801973	0.0193283	GP9
CLEC4C	170482	1.36695	0.0104763	0.0244221	CLEC4C
SASH3	54440	1.36615	2.4684e-11	4.49457e-10	SASH3
IL2RB	3560	1.36502	1.82449e-12	4.24072e-11	IL2RB
CASP5	838	1.36336	6.63817e-06	3.51529e-05	CASP5
NXPE4	54827	1.36284	0.000718942	0.00230582	NXPE4
GASK1B	51313	1.36153	7.65699e-10	1.00289e-08	GASK1B
LIMS4	100288695	1.36077	1.95744e-17	1.40851e-15	LIMS4
HABP2	3026	1.36051	0.00416262	0.0108416	HABP2
IL12RB1	3594	1.36042	8.93668e-10	1.1563e-08	IL12RB1
MIR4645	100616285	1.36034	0.00371313	0.00982522	MIR4645
RGS16	6004	1.36028	7.61757e-08	6.34884e-07	RGS16
RFX8	731220	1.35926	1.18987e-08	1.19715e-07	RFX8
OPN5	221391	1.35852	0.00569075	0.014269	OPN5
KCNE3	10008	1.35774	3.31461e-09	3.80529e-08	KCNE3
SERPINE1	5054	1.35644	1.94116e-06	1.15225e-05	SERPINE1
SCN11A	11280	1.35621	0.00302009	0.00821043	SCN11A
TRAT1	50852	1.35488	1.30085e-05	6.42572e-05	TRAT1
UGT1A3	54659	1.35398	0.0142446	0.031869	UGT1A3
NHSL2	340527	1.35387	1.9121e-14	6.79196e-13	NHSL2
TAFA3	284467	1.35386	0.00154979	0.00456713	TAFA3
NREP	9315	1.35289	6.30871e-11	1.04415e-09	NREP
DNASE2B	58511	1.35201	0.0182399	0.0395668	DNASE2B
TRGC1	445347	1.35171	3.59517e-07	2.53573e-06	TRGC1
PTCRA	171558	1.35168	1.79784e-05	8.59523e-05	PTCRA
PTPN22	26191	1.35167	8.65243e-09	8.99889e-08	PTPN22
SFRP4	6424	1.3514	0.0154551	0.0342276	SFRP4
SIT1	27240	1.35025	3.02301e-09	3.50661e-08	SIT1
L1TD1	54596	1.34881	0.00205388	0.00585783	L1TD1
CD244	51744	1.34836	3.16267e-09	3.65479e-08	CD244
CDH11	1009	1.34814	1.67135e-09	2.04299e-08	CDH11
IL2RG	3561	1.348	3.47648e-12	7.57817e-11	IL2RG
HEG1	57493	1.34751	2.20579e-16	1.22769e-14	HEG1
CFAP161	161502	1.34597	6.17269e-06	3.28723e-05	CFAP161
CD6	923	1.34493	1.29667e-08	1.29272e-07	CD6
TNIK	23043	1.34479	1.17741e-11	2.27818e-10	TNIK
TNFSF14	8740	1.3417	8.27757e-10	1.07899e-08	TNFSF14
SHD	56961	1.34135	0.0148966	0.0331553	SHD
SLC12A3	6559	1.34088	0.00112151	0.00343279	SLC12A3
LILRB1	10859	1.33984	1.78796e-05	8.55299e-05	LILRB1
IL2RA	3559	1.33872	8.40397e-05	0.000342821	IL2RA
BICD1	636	1.33657	1.00577e-16	6.02114e-15	BICD1
KERA	11081	1.33637	0.0190722	0.041136	KERA
CD247	919	1.33628	8.5212e-11	1.3697e-09	CD247
SP140	11262	1.33542	2.13071e-15	9.44643e-14	SP140
INHBA	3624	1.33511	6.96027e-06	3.66054e-05	INHBA
PLEKHG2	64857	1.33426	1.25512e-12	3.05321e-11	PLEKHG2
RGS1	5996	1.33415	0.000778661	0.00247953	RGS1
MAP4K1	11184	1.33305	2.88418e-11	5.19385e-10	MAP4K1
SOX11	6664	1.33287	0.0203379	0.0434762	SOX11
MIR6757	102466193	1.33185	0.00525658	0.0132945	MIR6757
GIMAP5	55340	1.33012	0.00209573	0.00595643	GIMAP5
ITGAX	3687	1.32953	4.35996e-09	4.86875e-08	ITGAX
LINC01303	101927780	1.329	2.79816e-08	2.59859e-07	LINC01303
FAM78A	286336	1.32853	3.17053e-12	6.97318e-11	FAM78A
SYT6	148281	1.32745	1.99723e-05	9.44364e-05	SYT6
SLC22A16	85413	1.32594	0.000262002	0.000941557	SLC22A16
BTBD19	149478	1.32571	1.73725e-12	4.05717e-11	BTBD19
FAM9C	171484	1.32521	0.00878145	0.0209527	FAM9C
SLC4A8	9498	1.32459	4.27925e-13	1.15932e-11	SLC4A8
SNX20	124460	1.32172	4.36223e-12	9.30428e-11	SNX20
NLGN4X	57502	1.32124	1.9437e-06	1.15321e-05	NLGN4X
LAMB1	3912	1.32054	1.58496e-23	7.20425e-21	LAMB1
LINC02159	285629	1.31939	1.67366e-05	8.0565e-05	LINC02159
GUCY1B1	2983	1.31909	4.95347e-10	6.77719e-09	GUCY1B1
CST2	1470	1.31871	0.0172435	0.0376617	CST2
DISC1	27185	1.31773	3.89008e-06	2.15925e-05	DISC1
HID1-AS1	102723641	1.31679	3.16784e-07	2.27021e-06	HID1-AS1
RAB39A	54734	1.31674	2.15552e-07	1.61155e-06	RAB39A
LAG3	3902	1.31491	3.59222e-08	3.24277e-07	LAG3
CETP	1071	1.3139	8.2182e-08	6.80538e-07	CETP
LINC00636	285205	1.3132	0.000209318	0.000770155	LINC00636
MIR126	406913	1.31291	0.000153996	0.000587296	MIR126
CD84	8832	1.3128	5.42123e-09	5.9087e-08	CD84
CSGALNACT1	55790	1.31267	1.35971e-13	4.07996e-12	CSGALNACT1
ZNF469	84627	1.31054	2.92996e-08	2.70564e-07	ZNF469
NLRP14	338323	1.30952	0.00906522	0.0215419	NLRP14
TAS1R3	83756	1.30874	2.55585e-07	1.87655e-06	TAS1R3
WDFY4	57705	1.3083	5.07736e-09	5.57352e-08	WDFY4
GAS2L3	283431	1.30825	2.36577e-08	2.22995e-07	GAS2L3
POU2F2	5452	1.30765	3.9941e-12	8.59205e-11	POU2F2
KIF26B	55083	1.30626	4.24065e-20	5.94782e-18	KIF26B
GNA15-DT	100996351	1.30614	3.6257e-06	2.02441e-05	GNA15-DT
SSUH2	51066	1.30581	4.24151e-07	2.9509e-06	SSUH2
PLEKHG7	440107	1.30301	0.00162108	0.0047521	PLEKHG7
HELB	92797	1.30275	1.89759e-15	8.51488e-14	HELB
LBP	3929	1.30215	0.0211955	0.0450306	LBP
ADAMTSL2	9719	1.30179	2.85403e-08	2.64348e-07	ADAMTSL2
ARRDC5	645432	1.30053	2.4494e-08	2.30612e-07	ARRDC5
GZMA	3001	1.29847	1.89195e-06	1.12686e-05	GZMA
KLRD1	3824	1.29658	2.49927e-07	1.84163e-06	KLRD1
CFI	3426	1.29605	9.59126e-10	1.2332e-08	CFI
ITGB3	3690	1.29583	2.29924e-09	2.7369e-08	ITGB3
CEP295NL	100653515	1.29445	8.29277e-05	0.000338679	CEP295NL
TP53I11	9537	1.29388	1.05093e-17	8.02158e-16	TP53I11
TRIB2	28951	1.29382	3.9035e-24	2.73747e-21	TRIB2
RUNX2	860	1.29347	2.18083e-15	9.64477e-14	RUNX2
SULF2	55959	1.29293	1.93103e-18	1.79069e-16	SULF2
VCAM1	7412	1.29272	7.6171e-08	6.34884e-07	VCAM1
SYT11	23208	1.29242	2.63689e-13	7.3884e-12	SYT11
F2R	2149	1.29105	2.37302e-13	6.68724e-12	F2R
GUCY1A1	2982	1.29092	3.1451e-11	5.59801e-10	GUCY1A1
CCNJL	79616	1.28827	4.22196e-11	7.31319e-10	CCNJL
PTPN7	5778	1.28782	7.32866e-11	1.19545e-09	PTPN7
FOXS1	2307	1.28467	3.1123e-06	1.76261e-05	FOXS1
COL4A2-AS1	100874203	1.28455	0.000384912	0.00132879	COL4A2-AS1
SAMD14	201191	1.28445	1.49217e-08	1.47089e-07	SAMD14
SPP1	6696	1.28196	0.020849	0.0444103	SPP1
CCR4	1233	1.27877	8.58903e-05	0.000349383	CCR4
COL5A2	1290	1.27757	1.9056e-08	1.83208e-07	COL5A2
ITGAD	3681	1.27597	6.80259e-05	0.000284591	ITGAD
LINC01182	101929071	1.27592	0.00565256	0.0141834	LINC01182
GAU1	101929549	1.27567	1.58575e-05	7.68606e-05	GAU1
CSTF3-DT	338739	1.27489	0.00355871	0.00945842	CSTF3-DT
ZBTB46	140685	1.27455	1.09436e-13	3.36604e-12	ZBTB46
CCL4L2	9560	1.2737	0.000247635	0.000894907	CCL4L2
EAF2	55840	1.27139	2.50143e-07	1.84266e-06	EAF2
PEAR1	375033	1.27055	1.09744e-10	1.72339e-09	PEAR1
OMG	4974	1.2697	3.40358e-07	2.41727e-06	OMG
ZCCHC12	170261	1.2695	0.0128564	0.0291349	ZCCHC12
SIGLEC14	100049587	1.26947	3.03227e-05	0.000137385	SIGLEC14
KLHL23	151230	1.26921	0.00266062	0.00735249	KLHL23
LTBP2	4053	1.26845	6.89078e-13	1.786e-11	LTBP2
ACSL6	23305	1.26795	6.13818e-08	5.25137e-07	ACSL6
MYO1B	4430	1.26645	8.53824e-12	1.70939e-10	MYO1B
GP5	2814	1.26606	0.000110474	0.000436931	GP5
ABI3	51225	1.26559	1.7102e-12	3.9978e-11	ABI3
BIN2	51411	1.26503	1.28195e-12	3.10922e-11	BIN2
ADAMTS9	56999	1.26263	1.71478e-10	2.59489e-09	ADAMTS9
ERG	2078	1.2626	9.80765e-11	1.55409e-09	ERG
GBP4	115361	1.26179	1.78314e-11	3.34867e-10	GBP4
GZMH	2999	1.26164	2.68829e-07	1.96206e-06	GZMH
SLC40A1	30061	1.26135	4.12039e-06	2.2773e-05	SLC40A1
SLC41A1	254428	1.26127	1.52073e-14	5.58779e-13	SLC41A1
CHST7	56548	1.25927	1.43921e-09	1.78954e-08	CHST7
DNAJC5B	85479	1.25758	0.00239672	0.00670397	DNAJC5B
LINC01775	101928602	1.25735	0.00798505	0.0192528	LINC01775
TRAPPC3L	100128327	1.2566	0.00021851	0.000800378	TRAPPC3L
LGALS9B	284194	1.25651	1.54926e-06	9.42187e-06	LGALS9B
WSCD1	23302	1.25632	4.45237e-07	3.08101e-06	WSCD1
TMEM52B	120939	1.25605	0.00770184	0.0186432	TMEM52B
ADORA2A	135	1.25503	0.00013979	0.000538218	ADORA2A
PCDHAC2	56134	1.2521	0.00138329	0.00412702	PCDHAC2
TAL1	6886	1.25208	1.11435e-11	2.16906e-10	TAL1
KCNE4	23704	1.25152	4.31365e-09	4.82363e-08	KCNE4
DACT1	51339	1.25035	1.21468e-07	9.63303e-07	DACT1
OR5AK4P	219525	1.24897	0.0227472	0.0477981	OR5AK4P
SCIMP	388325	1.24886	7.72987e-09	8.13243e-08	SCIMP
MROH2B	133558	1.24762	0.00711941	0.0173894	MROH2B
CCR2	729230	1.24492	1.21152e-07	9.61419e-07	CCR2
RAPGEF5	9771	1.24435	7.07243e-11	1.16116e-09	RAPGEF5
CSF2RB	1439	1.24408	4.05822e-14	1.35856e-12	CSF2RB
VNN2	8875	1.24177	1.41902e-06	8.7053e-06	VNN2
PTPRCAP	5790	1.23962	7.48605e-08	6.25834e-07	PTPRCAP
IPCEF1	26034	1.23898	4.89684e-11	8.35835e-10	IPCEF1
STARD8	9754	1.23869	6.28935e-11	1.04165e-09	STARD8
INSR	3643	1.23783	1.32468e-14	4.96399e-13	INSR
TMEM204	79652	1.23715	1.1304e-13	3.45957e-12	TMEM204
NR5A2	2494	1.2369	1.69526e-07	1.29707e-06	NR5A2
TFEC	22797	1.23515	2.73345e-05	0.000125313	TFEC
NGFR-AS1	100288866	1.23501	0.00190581	0.00548525	NGFR-AS1
FLRT2	23768	1.23464	1.29638e-21	2.97379e-19	FLRT2
FBLIM1	54751	1.23454	1.6355e-16	9.3793e-15	FBLIM1
PAPOLB	56903	1.23417	0.00420648	0.0109477	PAPOLB
DGKI	9162	1.23401	1.1865e-06	7.39906e-06	DGKI
SH3TC1	54436	1.23352	5.35051e-09	5.83941e-08	SH3TC1
ITGA10	8515	1.23294	5.3605e-12	1.12168e-10	ITGA10
KIF3C	3797	1.23289	6.64148e-16	3.37505e-14	KIF3C
CCL18	6362	1.23262	0.0025363	0.00704702	CCL18
AFAP1L1	134265	1.23165	4.29256e-08	3.8188e-07	AFAP1L1
GJC1	10052	1.23093	4.1949e-09	4.70154e-08	GJC1
DISC1-IT1	104472714	1.23069	0.00541764	0.013647	DISC1-IT1
CHST13	166012	1.22822	7.51627e-05	0.000311055	CHST13
POPDC3	64208	1.22709	0.000158167	0.000600497	POPDC3
CHIT1	1118	1.22651	0.0233636	0.0488508	CHIT1
TASL	80231	1.22585	2.17573e-09	2.60376e-08	TASL
SAMSN1	64092	1.22465	6.94677e-07	4.60336e-06	SAMSN1
LIMD2	80774	1.22461	3.69556e-10	5.18922e-09	LIMD2
THEMIS2	9473	1.22426	4.75626e-10	6.5402e-09	THEMIS2
PRSS23	11098	1.22375	1.15668e-07	9.22973e-07	PRSS23
CD53	963	1.22363	5.29328e-09	5.79295e-08	CD53
TSPO2	222642	1.22316	0.000429153	0.00146238	TSPO2
RNF144A	9781	1.22254	2.33641e-18	2.11614e-16	RNF144A
TRIL	9865	1.22147	1.69773e-08	1.65426e-07	TRIL
LIPG	9388	1.22062	0.00011992	0.000469597	LIPG
LINC01215	101929623	1.21974	0.000136893	0.000528724	LINC01215
CDKN2A	1029	1.21856	1.18608e-08	1.1941e-07	CDKN2A
ATP4B	496	1.21713	0.00112222	0.00343419	ATP4B
TRANK1	9881	1.21692	1.70247e-15	7.72405e-14	TRANK1
SPN	6693	1.21633	4.61048e-09	5.11593e-08	SPN
MSR1	4481	1.21621	0.000126384	0.000492163	MSR1
ST3GAL2	6483	1.21603	1.30518e-16	7.66405e-15	ST3GAL2
LINC03026	102724156	1.21598	0.00479718	0.0122576	LINC03026
PRKG1	5592	1.21589	3.22684e-08	2.94878e-07	PRKG1
KIAA1755	85449	1.21495	5.62838e-07	3.8047e-06	KIAA1755
TMEM119	338773	1.21396	3.9317e-07	2.7541e-06	TMEM119
PTPRE	5791	1.21165	3.7626e-16	2.02085e-14	PTPRE
FOXL1	2300	1.21076	2.85706e-07	2.06924e-06	FOXL1
RAB31	11031	1.2081	4.5243e-12	9.60632e-11	RAB31
DOCK2	1794	1.20809	7.82063e-11	1.26705e-09	DOCK2
SLC4A7	9497	1.20798	4.41523e-08	3.91376e-07	SLC4A7
LINC01132	100506810	1.2071	2.68137e-07	1.95934e-06	LINC01132
CASS4	57091	1.20642	9.52327e-10	1.22638e-08	CASS4
CD48	962	1.20616	6.06268e-08	5.1922e-07	CD48
IGFBP7	3490	1.20367	1.64968e-10	2.50256e-09	IGFBP7
PATL2	197135	1.20283	5.76252e-09	6.2254e-08	PATL2
ARHGAP25	9938	1.20238	5.82379e-16	3.00937e-14	ARHGAP25
DISP3	57540	1.2013	0.0047218	0.0120978	DISP3
PLCXD2	257068	1.20106	2.25473e-05	0.000105394	PLCXD2
KNL1	57082	1.20009	1.42184e-05	6.96726e-05	KNL1
FPR3	2359	1.20006	1.9221e-07	1.45118e-06	FPR3
ST8SIA2	8128	1.19934	0.00635762	0.0157179	ST8SIA2
P2RY6	5031	1.19917	2.94089e-09	3.42493e-08	P2RY6
TPBGL	100507050	1.19797	1.68488e-05	8.10114e-05	TPBGL
GPR18	2841	1.19647	2.07675e-09	2.49994e-08	GPR18
DIPK2B	79742	1.19632	3.42286e-10	4.8451e-09	DIPK2B
INPP4A	3631	1.19614	9.51062e-27	1.55625e-23	INPP4A
ORAI2	80228	1.19608	1.33532e-13	4.01169e-12	ORAI2
ADAMTSL3	57188	1.19518	1.65909e-07	1.27178e-06	ADAMTSL3
PCED1B	91523	1.19464	4.79664e-12	1.01582e-10	PCED1B
GPR68	8111	1.19392	1.39501e-14	5.19582e-13	GPR68
ITGA5	3678	1.1918	8.73682e-12	1.74772e-10	ITGA5
PLEKHO2	80301	1.19176	1.60647e-12	3.77329e-11	PLEKHO2
PDE10A	10846	1.19119	1.45309e-09	1.80405e-08	PDE10A
SLC17A9	63910	1.18971	2.13458e-07	1.59736e-06	SLC17A9
NR2F2	7026	1.18948	2.95322e-11	5.29487e-10	NR2F2
LINC01426	100506385	1.18837	1.82925e-05	8.7301e-05	LINC01426
EHD3	30845	1.18782	3.53322e-18	3.06441e-16	EHD3
NOL4L	140688	1.18697	3.60577e-15	1.53657e-13	NOL4L
ISG20	3669	1.18666	7.71267e-07	5.06034e-06	ISG20
PZP	5858	1.1863	2.89693e-05	0.00013197	PZP
TLR9	54106	1.18604	9.0969e-09	9.43647e-08	TLR9
RBM12B-AS1	55472	1.18289	4.55099e-08	4.02683e-07	RBM12B-AS1
BZW1-AS1	101927795	1.18151	0.0156527	0.0345779	BZW1-AS1
TIMD4	91937	1.18142	0.00427331	0.0110934	TIMD4
SSTR2	6752	1.18068	8.33216e-08	6.88827e-07	SSTR2
GPR65	8477	1.18058	6.16929e-07	4.1475e-06	GPR65
SCARF1	8578	1.17991	7.44814e-12	1.51337e-10	SCARF1
PAG1	55824	1.17918	3.20434e-18	2.81902e-16	PAG1
OAS2	4939	1.17832	3.03746e-06	1.72341e-05	OAS2
SCN3B	55800	1.17801	1.70673e-07	1.30463e-06	SCN3B
RASGRF2	5924	1.17749	1.09364e-09	1.39157e-08	RASGRF2
SCML2	10389	1.1774	6.22625e-08	5.31374e-07	SCML2
EVI2B	2124	1.17659	9.81396e-10	1.25985e-08	EVI2B
CCN4	8840	1.17636	4.31098e-07	2.9933e-06	CCN4
UBD	10537	1.17587	4.06542e-05	0.000178795	UBD
SH2D4B	387694	1.17384	7.29321e-05	0.000302691	SH2D4B
RUNX1	861	1.17384	1.23001e-15	5.80968e-14	RUNX1
MARCKSL1	65108	1.17375	1.16327e-11	2.25711e-10	MARCKSL1
IGSF6	10261	1.1733	1.63887e-07	1.25745e-06	IGSF6
ALDH1L2	160428	1.17284	1.10344e-08	1.12196e-07	ALDH1L2
APOBEC3H	164668	1.17256	4.80856e-07	3.29958e-06	APOBEC3H
MAP4K4	9448	1.17139	3.99881e-16	2.12428e-14	MAP4K4
TIFAB	497189	1.17098	8.59265e-06	4.43734e-05	TIFAB
PRF1	5551	1.17068	9.19791e-07	5.92087e-06	PRF1
AKNA	80709	1.17066	3.03886e-12	6.69558e-11	AKNA
DRC7	84229	1.169	0.0133176	0.0300468	DRC7
RGS7BP	401190	1.16861	0.00169165	0.00492954	RGS7BP
ARHGAP9	64333	1.16644	2.16607e-10	3.19893e-09	ARHGAP9
PARP14	54625	1.1638	1.32516e-13	3.98602e-12	PARP14
FHAD1-AS1	101927417	1.16276	8.81807e-05	0.000357161	FHAD1-AS1
ELFN1-AS1	101927125	1.1603	0.0192696	0.0414997	ELFN1-AS1
TNFRSF10C	8794	1.16011	1.90006e-08	1.82747e-07	TNFRSF10C
LINC00563	100861554	1.16008	0.0195066	0.0419402	LINC00563
LTA	4049	1.16	0.00285093	0.00780897	LTA
WNT1	7471	1.15881	0.000906926	0.00283935	WNT1
POM121L9P	29774	1.15783	1.44364e-07	1.12418e-06	POM121L9P
NOS3	4846	1.15745	3.69269e-10	5.18816e-09	NOS3
IL21R-AS1	283888	1.15616	0.00185034	0.00533937	IL21R-AS1
TBC1D10C	374403	1.15557	9.79935e-09	1.00807e-07	TBC1D10C
UBE2U	148581	1.15535	0.00441373	0.0114032	UBE2U
SLCO2B1	11309	1.1544	1.79274e-08	1.73625e-07	SLCO2B1
WIPF1	7456	1.15436	2.27751e-12	5.15697e-11	WIPF1
LAPTM5	7805	1.15179	8.40623e-09	8.76885e-08	LAPTM5
STMN2	11075	1.15179	0.0012129	0.00367538	STMN2
TRIM9	114088	1.15122	2.56744e-05	0.000118349	TRIM9
COL4A3	1285	1.15077	8.18569e-05	0.000335142	COL4A3
APOBEC3D	140564	1.15031	2.4957e-10	3.62467e-09	APOBEC3D
ANGPTL6	83854	1.1502	7.08694e-10	9.34444e-09	ANGPTL6
SAMD9L	219285	1.15015	5.58497e-09	6.05224e-08	SAMD9L
BTN3A3	10384	1.14989	1.39018e-18	1.34338e-16	BTN3A3
FAP	2191	1.14788	0.000114454	0.000450563	FAP
LCT-AS1	100507600	1.14694	0.0233166	0.0487732	LCT-AS1
TNFRSF11B	4982	1.14542	0.000138324	0.000533411	TNFRSF11B
ELK3	2004	1.14527	3.26492e-11	5.77776e-10	ELK3
GBP1P1	400759	1.14508	2.18078e-11	4.03066e-10	GBP1P1
THBS1	7057	1.14499	1.37776e-07	1.07869e-06	THBS1
CD163L1	283316	1.14372	1.94312e-06	1.15314e-05	CD163L1
SMPDL3B	27293	1.14366	3.49286e-07	2.46854e-06	SMPDL3B
MIR3605	100500853	1.14104	0.00169138	0.00492954	MIR3605
TDRD9	122402	1.13975	0.000458914	0.00155131	TDRD9
MICAL2	9645	1.13945	1.53685e-12	3.64112e-11	MICAL2
ZNF804A	91752	1.13709	0.00136662	0.00408074	ZNF804A
CST7	8530	1.13626	1.20111e-07	9.54089e-07	CST7
SLC20A1	6574	1.13579	2.7607e-16	1.52273e-14	SLC20A1
TM4SF18	116441	1.135	0.00014078	0.000541522	TM4SF18
SELE	6401	1.13377	0.00281704	0.00772389	SELE
CCL3	6348	1.13334	0.000335039	0.00117412	CCL3
L3MBTL3	84456	1.13266	5.24576e-17	3.35305e-15	L3MBTL3
TOX	9760	1.13265	6.48983e-07	4.33568e-06	TOX
TLR7	51284	1.13225	5.84865e-05	0.000248451	TLR7
PLXND1	23129	1.13221	3.23251e-09	3.72672e-08	PLXND1
NGFR	4804	1.13194	1.18799e-05	5.9327e-05	NGFR
KBTBD8	84541	1.13173	9.28537e-10	1.19889e-08	KBTBD8
PIK3CD-AS1	644997	1.13039	0.00146264	0.00433476	PIK3CD-AS1
AMZ1	155185	1.12967	1.21136e-05	6.0359e-05	AMZ1
RHOF	54509	1.12937	2.55776e-07	1.8774e-06	RHOF
UBAP1L	390595	1.12715	4.87205e-06	2.65154e-05	UBAP1L
CXCL11	6373	1.12714	0.00382657	0.0100776	CXCL11
TEK	7010	1.12618	3.53178e-09	4.03198e-08	TEK
APLNR	187	1.12579	4.84263e-05	0.000209412	APLNR
BCAT1	586	1.12434	0.000337819	0.00118302	BCAT1
CYP7B1	9420	1.12229	2.80873e-09	3.28131e-08	CYP7B1
OVOL3	728361	1.11926	0.00135934	0.00406099	OVOL3
PDE1A	5136	1.11912	2.06776e-06	1.22005e-05	PDE1A
IL4I1	259307	1.11844	0.000204852	0.000755651	IL4I1
BATF2	116071	1.11826	1.44102e-05	7.0458e-05	BATF2
ADAMTS6	11174	1.11797	1.4425e-05	7.04882e-05	ADAMTS6
DLEU1	100874074	1.11776	0.0131447	0.02969	DLEU1
HLA-DOB	3112	1.11751	2.21726e-08	2.10614e-07	HLA-DOB
APOBEC3G	60489	1.11644	1.87285e-09	2.27457e-08	APOBEC3G
LINC02889	101927630	1.11571	0.00912735	0.0216685	LINC02889
COTL1	23406	1.11551	4.48058e-12	9.52172e-11	COTL1
PREX2	80243	1.11504	9.51356e-06	4.86176e-05	PREX2
CD8B	926	1.11433	1.04378e-05	5.28023e-05	CD8B
TNS3	64759	1.11284	9.75248e-14	3.03775e-12	TNS3
FER1L6	654463	1.11252	0.0178461	0.0388017	FER1L6
PIK3R5	23533	1.11231	1.8168e-10	2.73579e-09	PIK3R5
BCL2L11	10018	1.10948	7.0336e-16	3.55226e-14	BCL2L11
KCNK9	51305	1.10911	0.00381719	0.0100583	KCNK9
DOCK4	9732	1.10876	5.14108e-11	8.71463e-10	DOCK4
ANKRD44	91526	1.10782	1.5689e-13	4.6508e-12	ANKRD44
ATP1A3	478	1.10766	1.09342e-06	6.89748e-06	ATP1A3
S1PR3	1903	1.1049	2.97469e-09	3.45709e-08	S1PR3
STEAP1B-AS1	100506178	1.1048	0.000345998	0.00120667	STEAP1B-AS1
PLET1	349633	1.10425	0.00551547	0.0138749	PLET1
ARHGAP31-AS1	100874246	1.10273	0.000291765	0.00103443	ARHGAP31-AS1
CD3D	915	1.10266	1.74004e-06	1.04808e-05	CD3D
GPR182	11318	1.1022	0.000270283	0.00096693	GPR182
KMO	8564	1.10099	6.39401e-06	3.39405e-05	KMO
KCNJ2	3759	1.09912	2.00349e-08	1.91942e-07	KCNJ2
ST6GALNAC3	256435	1.09894	6.73778e-08	5.70182e-07	ST6GALNAC3
SLFN14	342618	1.09872	5.73041e-05	0.000243893	SLFN14
CD28	940	1.09818	9.26121e-05	0.000373323	CD28
CARD8	22900	1.09759	4.26549e-17	2.79191e-15	CARD8
MIR6819	102465491	1.09649	0.00194464	0.00558455	MIR6819
CACNA1C	775	1.0964	9.63107e-09	9.93255e-08	CACNA1C
ST8SIA1	6489	1.09623	2.9014e-12	6.42154e-11	ST8SIA1
TNFSF13B	10673	1.09407	1.80531e-07	1.37102e-06	TNFSF13B
BTLA	151888	1.09374	5.1997e-05	0.000223671	BTLA
SNORD11	692058	1.09366	0.00585406	0.0146203	SNORD11
ACY3	91703	1.09302	0.00032796	0.00115063	ACY3
PLAU	5328	1.0901	4.09721e-11	7.10713e-10	PLAU
F8	2157	1.09	4.02594e-07	2.81609e-06	F8
TBX1	6899	1.08821	9.26038e-06	4.74253e-05	TBX1
CMTM1	113540	1.08798	1.24586e-07	9.85803e-07	CMTM1
IRF8	3394	1.08776	3.45171e-07	2.44579e-06	IRF8
GRM3	2913	1.08725	0.000183113	0.000684121	GRM3
BRCA2	675	1.08705	4.18553e-07	2.91941e-06	BRCA2
TBX21	30009	1.08674	6.12366e-06	3.26396e-05	TBX21
IGF2BP3	10643	1.08667	4.42905e-06	2.43201e-05	IGF2BP3
BCL2L14	79370	1.08374	2.33028e-05	0.000108501	BCL2L14
GIMAP8	155038	1.08335	4.28346e-11	7.40405e-10	GIMAP8
TSHZ3	57616	1.08279	2.44063e-11	4.45393e-10	TSHZ3
RESF1	55196	1.08263	1.06828e-11	2.09431e-10	RESF1
GZMM	3004	1.08257	3.38924e-06	1.90538e-05	GZMM
MIR4489	100616284	1.08161	0.00524747	0.0132742	MIR4489
MARCKS	4082	1.07879	3.03439e-14	1.04166e-12	MARCKS
SOX17	64321	1.07804	1.46437e-05	7.14282e-05	SOX17
MIR6758	102465454	1.0772	0.00114042	0.00348458	MIR6758
DIO2	1734	1.07708	3.1462e-05	0.000141825	DIO2
IL17REL	400935	1.07612	0.000671872	0.00217102	IL17REL
FBXL19-AS1	283932	1.076	1.59876e-11	3.03493e-10	FBXL19-AS1
SAMD9	54809	1.07576	1.01106e-06	6.4275e-06	SAMD9
CD69	969	1.07544	0.0011717	0.00356506	CD69
SOX30	11063	1.07531	2.36958e-05	0.00011005	SOX30
HLA-DQA1	3117	1.07519	0.00585958	0.0146311	HLA-DQA1
CTSS	1520	1.07395	1.82181e-07	1.38226e-06	CTSS
SEC24D	9871	1.0738	5.4213e-11	9.1517e-10	SEC24D
ZAP70	7535	1.07347	4.34023e-07	3.01105e-06	ZAP70
TRPC3	7222	1.07222	3.00847e-05	0.000136435	TRPC3
SSH2	85464	1.07097	3.49633e-16	1.89861e-14	SSH2
JCAD	57608	1.07065	1.22261e-08	1.22736e-07	JCAD
RAC2	5880	1.06997	3.97146e-08	3.55505e-07	RAC2
ASAP1	50807	1.0698	8.18338e-15	3.20864e-13	ASAP1
EDNRA	1909	1.06892	3.84392e-08	3.44649e-07	EDNRA
CDRT15P3	408029	1.0688	9.49096e-05	0.000381644	CDRT15P3
CEP170	9859	1.06841	1.73559e-10	2.62315e-09	CEP170
KLHL4	56062	1.06702	0.00401365	0.0105218	KLHL4
IQSEC3	440073	1.06686	0.00034927	0.00121704	IQSEC3
APOL1	8542	1.06671	1.07832e-08	1.09869e-07	APOL1
SEMA6A	57556	1.06544	5.53161e-12	1.15552e-10	SEMA6A
TRIM22	10346	1.06541	4.503e-09	5.00571e-08	TRIM22
FAM186A	121006	1.06533	0.00836398	0.0200619	FAM186A
ZNF532	55205	1.06436	8.55841e-20	1.12605e-17	ZNF532
EPHA3	2042	1.06375	6.11674e-06	3.26168e-05	EPHA3
INHBB	3625	1.0637	5.35472e-06	2.88734e-05	INHBB
GRB10	2887	1.06363	6.83166e-14	2.18907e-12	GRB10
SCRN1	9805	1.06345	2.14604e-13	6.16797e-12	SCRN1
CCDC141	285025	1.06341	0.000927885	0.00289942	CCDC141
HTR1B	3351	1.06263	0.00373676	0.00987679	HTR1B
GRAP2	9402	1.0626	1.15632e-08	1.16894e-07	GRAP2
NPFFR2	10886	1.06223	0.019473	0.041879	NPFFR2
BATF3	55509	1.06068	5.54115e-06	2.97609e-05	BATF3
CSRNP3	80034	1.05958	3.79157e-09	4.28867e-08	CSRNP3
CASP10	843	1.05849	9.22353e-15	3.56522e-13	CASP10
LINC00426	100188949	1.05837	6.96127e-06	3.66054e-05	LINC00426
MYO1G	64005	1.05819	2.71752e-08	2.52849e-07	MYO1G
PDE3A	5139	1.05692	1.34618e-06	8.30826e-06	PDE3A
RNF213	57674	1.05665	1.29431e-12	3.13302e-11	RNF213
EPHX4	253152	1.05643	1.93753e-05	9.19323e-05	EPHX4
SLC6A6	6533	1.05595	2.09051e-12	4.77316e-11	SLC6A6
MFAP3	4238	1.05594	1.66395e-09	2.03497e-08	MFAP3
ANKRD1	27063	1.05491	0.0030903	0.00837398	ANKRD1
THY1	7070	1.05458	6.3514e-05	0.000267493	THY1
TMC8	147138	1.05395	3.35861e-09	3.84771e-08	TMC8
AJAP1	55966	1.05199	2.85816e-05	0.000130446	AJAP1
LETR1	400456	1.05104	1.71192e-06	1.03266e-05	LETR1
BHLHE22-AS1	401463	1.05072	0.00193874	0.00557022	BHLHE22-AS1
CHSY1	22856	1.05026	1.14212e-18	1.13412e-16	CHSY1
CHRM3-AS2	100506915	1.0491	0.0181901	0.0394728	CHRM3-AS2
MIR155HG	114614	1.04871	3.64552e-08	3.28727e-07	MIR155HG
RIMBP3B	440804	1.04806	1.1643e-06	7.28841e-06	RIMBP3B
TMOD2	29767	1.048	6.48429e-10	8.63574e-09	TMOD2
PLPPR4	9890	1.04567	2.34532e-06	1.36639e-05	PLPPR4
STAT1	6772	1.04277	4.21662e-10	5.86718e-09	STAT1
BLM	641	1.04229	1.7231e-08	1.67632e-07	BLM
CSMD2	114784	1.04161	2.60133e-06	1.49706e-05	CSMD2
CIITA	4261	1.04135	7.21209e-10	9.48664e-09	CIITA
TNFRSF21	27242	1.04132	1.42546e-09	1.77631e-08	TNFRSF21
VCAN	1462	1.04113	4.58124e-05	0.000199162	VCAN
EMILIN1	11117	1.04001	8.67897e-06	4.47815e-05	EMILIN1
HIPK2	28996	1.03985	6.34373e-11	1.04924e-09	HIPK2
MEIKIN	728637	1.03912	0.0149881	0.0333249	MEIKIN
KLHDC7B	113730	1.03833	0.00413167	0.0107747	KLHDC7B
NAV1	89796	1.03811	3.78452e-16	2.02377e-14	NAV1
MSC	9242	1.03783	2.2027e-08	2.09312e-07	MSC
SULT1C4	27233	1.0377	0.000107047	0.000425156	SULT1C4
C20orf204	284739	1.03629	1.48378e-07	1.15105e-06	C20orf204
LIPI	149998	1.03598	0.0236757	0.0494529	LIPI
MOBP	4336	1.03541	0.00656021	0.0161651	MOBP
CD37	951	1.03533	5.23327e-09	5.7344e-08	CD37
AKAP12	9590	1.03489	7.99943e-05	0.000328503	AKAP12
FOXC2	2303	1.03381	0.000618993	0.00202037	FOXC2
CRISPLD2	83716	1.03336	2.51519e-08	2.36082e-07	CRISPLD2
NKG7	4818	1.0306	2.09362e-05	9.85386e-05	NKG7
AGAP2	116986	1.03006	3.88949e-11	6.76694e-10	AGAP2
ZC3H12D	340152	1.02982	1.9933e-08	1.91071e-07	ZC3H12D
PIK3CD	5293	1.02975	1.41808e-11	2.7003e-10	PIK3CD
NLRC5	84166	1.02796	6.98923e-13	1.80961e-11	NLRC5
PLVAP	83483	1.02795	1.30156e-07	1.0246e-06	PLVAP
CCDC42	146849	1.02715	0.0104533	0.0243756	CCDC42
SMAD1	4086	1.02686	1.8774e-11	3.52031e-10	SMAD1
CDKL5	6792	1.02669	4.09659e-05	0.000179941	CDKL5
PLCL1	5334	1.02663	3.1353e-08	2.87578e-07	PLCL1
IL5RA	3568	1.02649	0.00624039	0.015478	IL5RA
HSPA13	6782	1.02637	9.52927e-07	6.09898e-06	HSPA13
SNAP25	6616	1.02605	0.000396924	0.00136584	SNAP25
MEFV	4210	1.02506	5.78552e-05	0.000246025	MEFV
LINC02325	101929241	1.02486	0.00972124	0.022853	LINC02325
ARHGEF17	9828	1.0247	5.62647e-08	4.86224e-07	ARHGEF17
SOX18	54345	1.02408	1.85825e-05	8.85473e-05	SOX18
TUBA3D	113457	1.02361	1.59903e-05	7.7367e-05	TUBA3D
NCKAP1L	3071	1.02263	2.01209e-08	1.92691e-07	NCKAP1L
FGD5P1	100132526	1.02179	0.000101034	0.000403494	FGD5P1
ATP11A	23250	1.02152	6.8616e-13	1.78032e-11	ATP11A
TOR4A	54863	1.02125	1.11429e-06	7.00928e-06	TOR4A
STAP1	26228	1.02066	0.00356393	0.00947127	STAP1
CACNG8	59283	1.02034	0.00572274	0.0143375	CACNG8
TP53INP1	94241	1.02027	6.92126e-10	9.14328e-09	TP53INP1
MIR4517	100616487	1.01876	3.70434e-05	0.000164507	MIR4517
TLR8	51311	1.01861	0.000417665	0.00142855	TLR8
FBN2	2201	1.01827	0.000584883	0.00192182	FBN2
HCLS1	3059	1.01821	5.17215e-09	5.6725e-08	HCLS1
RASL10A	10633	1.0177	2.50121e-05	0.000115573	RASL10A
SNAI1	6615	1.01761	0.000148397	0.000568061	SNAI1
ZFP69B	65243	1.0176	7.6412e-12	1.54619e-10	ZFP69B
CYP2G1P	22952	1.01709	0.00929932	0.022015	CYP2G1P
CCL16	6360	1.01702	0.00010451	0.00041636	CCL16
C12orf42	374470	1.01697	0.0169594	0.0371237	C12orf42
GPRIN1	114787	1.01681	8.27372e-08	6.84688e-07	GPRIN1
FMO3	2328	1.01676	0.00018983	0.00070586	FMO3
HTR1F	3355	1.01655	0.000273266	0.000975751	HTR1F
CYP26A1	1592	1.01614	0.00743259	0.0180644	CYP26A1
PNP	4860	1.01594	2.14858e-08	2.04565e-07	PNP
PPM1F	9647	1.01492	1.70738e-12	3.995e-11	PPM1F
A2M	2	1.0145	3.37451e-07	2.40079e-06	A2M
SYNDIG1	79953	1.01275	0.00293147	0.00799832	SYNDIG1
INPP5D	3635	1.01256	4.41651e-14	1.46888e-12	INPP5D
EPSTI1	94240	1.01232	1.0843e-06	6.84343e-06	EPSTI1
TMEM200A	114801	1.01196	4.33953e-06	2.3882e-05	TMEM200A
PEAK1	79834	1.01183	9.00134e-12	1.79478e-10	PEAK1
MS4A7	58475	1.01078	0.00124976	0.00377496	MS4A7
MLKL	197259	1.00998	5.38377e-15	2.20978e-13	MLKL
OXTR	5021	1.00967	0.000312528	0.00110263	OXTR
IRF1	3659	1.00941	2.73793e-10	3.94845e-09	IRF1
KCNK13	56659	1.00922	1.65274e-06	9.9956e-06	KCNK13
IL18BP	10068	1.00894	4.02062e-10	5.61674e-09	IL18BP
LUM	4060	1.00894	0.00506231	0.0128588	LUM
PLCG2	5336	1.00889	7.1365e-16	3.57918e-14	PLCG2
SSH1	54434	1.00839	9.17876e-21	1.51203e-18	SSH1
PRAG1	157285	1.00756	2.08502e-11	3.87116e-10	PRAG1
SARDH	1757	1.00742	4.27579e-06	2.35471e-05	SARDH
CYTL1	54360	1.00696	0.000440944	0.00149965	CYTL1
STRIP2	57464	1.00656	6.57667e-08	5.58562e-07	STRIP2
SHANK3	85358	1.00521	5.83698e-07	3.93595e-06	SHANK3
XCL2	6846	1.00519	0.00687065	0.0168573	XCL2
TREH	11181	1.00482	0.0111012	0.0256693	TREH
ERMN	57471	1.0046	0.00164612	0.00481804	ERMN
PCGF3-AS1	100129917	1.0043	1.2845e-05	6.35649e-05	PCGF3-AS1
GPRC5B	51704	1.00239	3.38924e-07	2.40918e-06	GPRC5B
CYGB	114757	1.00153	7.83437e-07	5.1347e-06	CYGB
PIK3AP1	118788	1.00076	5.20846e-07	3.54329e-06	PIK3AP1
CPXM1	56265	1.00036	0.000969479	0.00301543	CPXM1
TEP1	7011	0.999714	1.48543e-18	1.42422e-16	TEP1
OTOA	146183	0.999605	0.000501736	0.00167699	OTOA
RPS6KA2	6196	0.999548	6.16232e-11	1.02268e-09	RPS6KA2
RAB43	339122	0.998327	1.52043e-05	7.39135e-05	RAB43
IL10RA	3587	0.997274	2.9875e-07	2.15165e-06	IL10RA
LPXN	9404	0.997083	3.82197e-13	1.04234e-11	LPXN
IGSF21	84966	0.996881	4.20768e-05	0.000184523	IGSF21
WAS	7454	0.99641	5.69577e-08	4.9157e-07	WAS
PCAT19	100505495	0.995937	1.69989e-05	8.16834e-05	PCAT19
L3MBTL4-AS1	101927150	0.995586	0.000127925	0.000497609	L3MBTL4-AS1
UCKL1-AS1	100113386	0.995386	0.00155815	0.00458737	UCKL1-AS1
MIR6732	102465438	0.994989	0.0239672	0.049968	MIR6732
LEF1	51176	0.992663	1.83903e-07	1.39361e-06	LEF1
PAQR8	85315	0.992029	6.67713e-13	1.73797e-11	PAQR8
ASPN	54829	0.991944	0.000472993	0.00159167	ASPN
APOL6	80830	0.991228	4.26076e-10	5.91852e-09	APOL6
CEP135	9662	0.990772	7.10655e-11	1.16565e-09	CEP135
FAM126A	84668	0.990233	5.50907e-06	2.9621e-05	FAM126A
SLFN11	91607	0.99015	1.85488e-08	1.78962e-07	SLFN11
IFNAR2	3455	0.989657	1.20615e-14	4.5591e-13	IFNAR2
MGAT4A	11320	0.98961	1.1697e-09	1.47915e-08	MGAT4A
SPOCK2	9806	0.989585	0.000301385	0.00106608	SPOCK2
NAPSB	256236	0.989518	1.69059e-06	1.02055e-05	NAPSB
PLAC8	51316	0.989424	0.000257986	0.000928484	PLAC8
BTN3A1	11119	0.988362	1.2423e-13	3.75985e-12	BTN3A1
WNT9B	7484	0.988064	0.00034358	0.00119943	WNT9B
CD1D	912	0.987957	5.035e-05	0.000217234	CD1D
PVRIG	79037	0.987309	4.00928e-09	4.51619e-08	PVRIG
SERPINA1	5265	0.987123	8.44819e-05	0.000344339	SERPINA1
OAS3	4940	0.986385	0.000460783	0.00155634	OAS3
SNORD45C	692085	0.986133	0.00538217	0.0135757	SNORD45C
MECOM	2122	0.985893	9.9012e-07	6.30906e-06	MECOM
WNT5A	7474	0.984692	8.92982e-07	5.77404e-06	WNT5A
MEF2C	4208	0.984646	1.70726e-06	1.03036e-05	MEF2C
SLC24A1	9187	0.984467	8.26514e-16	4.07365e-14	SLC24A1
C1QTNF6	114904	0.983706	2.92855e-07	2.11602e-06	C1QTNF6
DCHS1	8642	0.983154	1.23401e-06	7.6797e-06	DCHS1
SLC22A13	9390	0.982235	0.0198672	0.0426334	SLC22A13
NUP210	23225	0.981675	2.41006e-09	2.85772e-08	NUP210
PLEK	5341	0.981103	1.90876e-06	1.1355e-05	PLEK
ITM2C	81618	0.981062	1.89017e-05	8.99623e-05	ITM2C
ADCY1	107	0.981058	6.1908e-07	4.15854e-06	ADCY1
SLC1A4	6509	0.980541	1.04291e-10	1.64407e-09	SLC1A4
PDPN	10630	0.979757	0.000135858	0.000525223	PDPN
TRIM56	81844	0.979526	6.3756e-09	6.8306e-08	TRIM56
OSM	5008	0.979036	0.000564058	0.00186211	OSM
DGKD	8527	0.978077	7.55257e-10	9.90796e-09	DGKD
SLFN5	162394	0.978071	4.49904e-07	3.1083e-06	SLFN5
COMP	1311	0.977579	0.0153082	0.0339574	COMP
DENND5B	160518	0.977515	6.40281e-08	5.4455e-07	DENND5B
C11orf21	29125	0.976951	1.79365e-05	8.57857e-05	C11orf21
KIF14	9928	0.976697	8.98614e-05	0.00036307	KIF14
NOX4	50507	0.976512	0.000327887	0.00115053	NOX4
EFCAB14-AS1	100130197	0.976126	0.00494805	0.0126007	EFCAB14-AS1
EBF2	64641	0.975878	0.000594873	0.00195124	EBF2
RGS18	64407	0.975515	0.000177173	0.000664354	RGS18
NR2F1-AS1	441094	0.975026	2.65099e-05	0.000121851	NR2F1-AS1
HGF	3082	0.974127	5.80767e-05	0.000246881	HGF
SIGLEC8	27181	0.972509	0.00170264	0.00495923	SIGLEC8
TNFSF15	9966	0.971586	7.74397e-06	4.02924e-05	TNFSF15
PITX3	5309	0.971473	0.00739177	0.0179795	PITX3
CD274	29126	0.970817	7.12614e-09	7.56536e-08	CD274
LRRC71	149499	0.970777	0.00212922	0.00604043	LRRC71
PRKAR1B-AS1	101926963	0.969926	2.11131e-07	1.58235e-06	PRKAR1B-AS1
CELF2-AS1	414196	0.969547	0.0098846	0.0231904	CELF2-AS1
ICAM3	3385	0.969405	4.21572e-08	3.75453e-07	ICAM3
CD7	924	0.968534	0.00017168	0.000646204	CD7
TGFB1	7040	0.967431	5.75296e-10	7.76286e-09	TGFB1
CCR1	1230	0.967268	0.000252042	0.000909227	CCR1
CCM2L	140706	0.966946	1.56133e-07	1.20664e-06	CCM2L
COL18A1	80781	0.966761	3.5482e-08	3.21012e-07	COL18A1
MAP3K7CL	56911	0.965963	5.05837e-11	8.59819e-10	MAP3K7CL
LIMS1	3987	0.965474	3.24729e-10	4.62325e-09	LIMS1
ATM	472	0.964454	7.78508e-10	1.01912e-08	ATM
ZBTB20-AS1	100131117	0.963228	0.00236813	0.00663461	ZBTB20-AS1
CD79B	974	0.963175	8.9325e-06	4.59447e-05	CD79B
CIP2A	57650	0.962605	4.6501e-09	5.15523e-08	CIP2A
HLA-L	3139	0.962001	2.5313e-05	0.000116831	HLA-L
PCBP3	54039	0.961961	0.000102663	0.000409399	PCBP3
CCNE2	9134	0.960636	1.78428e-06	1.06948e-05	CCNE2
NPNT	255743	0.959897	1.10495e-05	5.56786e-05	NPNT
MIR6739	102466724	0.959422	0.0142585	0.0318941	MIR6739
ACSM2A	123876	0.95911	0.0219125	0.0463697	ACSM2A
ALDH1A3	220	0.959065	1.30276e-06	8.06257e-06	ALDH1A3
LGALS9C	654346	0.958788	0.00123239	0.00372983	LGALS9C
EVI2A	2123	0.958178	3.98615e-05	0.000175813	EVI2A
CLSPN	63967	0.958008	5.02362e-08	4.39276e-07	CLSPN
SNAI3	333929	0.9569	5.38505e-07	3.65228e-06	SNAI3
OIT3	170392	0.956756	0.0173285	0.0378204	OIT3
C5AR1	728	0.955342	3.16386e-07	2.26801e-06	C5AR1
TRAF3IP3	80342	0.955241	2.19958e-08	2.09096e-07	TRAF3IP3
ITGB2	3689	0.954704	8.97075e-07	5.79898e-06	ITGB2
PHTF1	10745	0.954545	9.24805e-11	1.47494e-09	PHTF1
NXPE3	91775	0.954484	1.16356e-13	3.55217e-12	NXPE3
KCNS2	3788	0.951146	0.00613763	0.0152462	KCNS2
SLC39A14	23516	0.950727	8.59049e-08	7.0685e-07	SLC39A14
GEM	2669	0.950628	1.1978e-05	5.97681e-05	GEM
FUT4	2526	0.949281	1.15725e-10	1.80692e-09	FUT4
KLHL5	51088	0.94826	5.71114e-08	4.92551e-07	KLHL5
RIMBP3	85376	0.948236	0.000117857	0.000462553	RIMBP3
PTPRM	5797	0.94716	1.44762e-09	1.79817e-08	PTPRM
ELAPOR2	222223	0.946639	3.61878e-07	2.55165e-06	ELAPOR2
ADPRH	141	0.946043	2.47681e-10	3.60149e-09	ADPRH
SPRED1	161742	0.945518	1.44282e-13	4.29782e-12	SPRED1
LIPA	3988	0.945196	4.74543e-06	2.58779e-05	LIPA
SYNPO	11346	0.944351	2.78498e-07	2.0242e-06	SYNPO
GJD3	125111	0.943963	2.08848e-10	3.10784e-09	GJD3
ZNF366	167465	0.943549	2.0054e-09	2.42715e-08	ZNF366
FAM131B	9715	0.942379	5.69178e-07	3.84332e-06	FAM131B
E2F3	1871	0.942156	3.2018e-14	1.0976e-12	E2F3
EMID1	129080	0.942094	8.23056e-05	0.000336427	EMID1
RELT	84957	0.941348	6.85353e-09	7.29488e-08	RELT
SIGLEC9	27180	0.941284	4.30921e-05	0.000188538	SIGLEC9
MYO1F	4542	0.941158	2.47709e-08	2.32951e-07	MYO1F
KLF12	11278	0.940181	3.96519e-09	4.47269e-08	KLF12
C1orf127	148345	0.939658	0.000266782	0.000955936	C1orf127
TSPAN12	23554	0.93952	4.16551e-05	0.000182869	TSPAN12
DGKH	160851	0.938909	1.47565e-12	3.51307e-11	DGKH
FLACC1	130540	0.938819	3.5712e-07	2.52027e-06	FLACC1
SAMHD1	25939	0.938229	9.51695e-08	7.74514e-07	SAMHD1
CLEC7A	64581	0.938038	2.07718e-05	9.78022e-05	CLEC7A
CREM	1390	0.937077	6.34739e-07	4.25325e-06	CREM
RUBCNL	80183	0.935174	1.92553e-06	1.14436e-05	RUBCNL
ADAMTS2	9509	0.931711	7.65504e-05	0.000315733	ADAMTS2
OTOGL	283310	0.93093	0.00107113	0.00329667	OTOGL
TBXAS1	6916	0.930823	3.59516e-06	2.01147e-05	TBXAS1
SLC2A3	6515	0.930477	6.63248e-05	0.000278138	SLC2A3
DPY19L1	23333	0.930223	1.69527e-10	2.56854e-09	DPY19L1
FZD8	8325	0.930079	1.13135e-06	7.10566e-06	FZD8
BISPR	105221694	0.929567	3.17068e-08	2.90498e-07	BISPR
MYCT1	80177	0.928738	4.92593e-05	0.000212864	MYCT1
IRAG2	4033	0.928632	1.34257e-08	1.33468e-07	IRAG2
KIF5C	3800	0.928132	2.45252e-05	0.000113537	KIF5C
RAB42	115273	0.927946	6.72999e-05	0.000281842	RAB42
E2F5	1875	0.926928	2.34478e-08	2.21101e-07	E2F5
BTN3A2	11118	0.926879	5.23352e-12	1.0998e-10	BTN3A2
SHC1	6464	0.926333	1.88085e-13	5.47633e-12	SHC1
SOCS3-DT	101928674	0.926044	0.0028113	0.00770988	SOCS3-DT
MICB	4277	0.925874	7.69171e-06	4.00664e-05	MICB
SLC6A1	6529	0.925131	0.0024296	0.00678513	SLC6A1
CLEC9A	283420	0.924048	0.00101527	0.00314087	CLEC9A
GCH1	2643	0.922813	1.19008e-08	1.19715e-07	GCH1
TRAM2	9697	0.922478	2.57662e-11	4.66739e-10	TRAM2
ATP11C	286410	0.922462	4.8009e-11	8.21172e-10	ATP11C
NLRP6	171389	0.921938	7.94675e-05	0.000326449	NLRP6
DENND11	57189	0.92173	3.25634e-09	3.74891e-08	DENND11
S100Z	170591	0.921173	0.00930899	0.0220273	S100Z
TUBA3FP	113691	0.920812	0.000604	0.00197801	TUBA3FP
COL5A1	1289	0.92075	4.03453e-05	0.000177532	COL5A1
BEND4	389206	0.920451	0.00818086	0.0196765	BEND4
PLD4	122618	0.920384	4.72952e-05	0.000205027	PLD4
EPHB2	2048	0.919553	8.29148e-06	4.29174e-05	EPHB2
MSC-AS1	100132891	0.91922	2.38993e-06	1.39007e-05	MSC-AS1
LINC01711	79160	0.919183	0.0192039	0.0413691	LINC01711
AGMAT	79814	0.91908	7.20941e-08	6.06218e-07	AGMAT
PRRG1	5638	0.918618	1.31829e-07	1.03643e-06	PRRG1
SEC14L1	6397	0.918093	5.77849e-14	1.88608e-12	SEC14L1
DBH-AS1	138948	0.917241	0.000517122	0.00172152	DBH-AS1
BMP2K	55589	0.9171	1.41335e-10	2.16816e-09	BMP2K
OSMR	9180	0.916951	4.10698e-09	4.61565e-08	OSMR
HLA-DOA	3111	0.916597	9.64588e-06	4.91858e-05	HLA-DOA
CDKN2B-AS1	100048912	0.915853	4.43586e-05	0.00019338	CDKN2B-AS1
MIR6511B2	102465985	0.915514	0.000757079	0.00241739	MIR6511B2
NFATC2	4773	0.915313	2.05005e-13	5.92681e-12	NFATC2
PARVG	64098	0.91492	1.40705e-07	1.09882e-06	PARVG
FERMT3	83706	0.914497	1.3891e-07	1.08654e-06	FERMT3
ARL4C	10123	0.913914	4.96052e-11	8.46115e-10	ARL4C
PTPRB	5787	0.913723	1.2354e-07	9.78156e-07	PTPRB
CD40LG	959	0.913581	0.000851785	0.00268452	CD40LG
TMC1	117531	0.913437	0.000408175	0.00140018	TMC1
C18orf54	162681	0.912993	1.04854e-07	8.44925e-07	C18orf54
SOCS2-AS1	144481	0.912528	5.86172e-06	3.13319e-05	SOCS2-AS1
APBA2	321	0.911373	4.2888e-05	0.000187712	APBA2
LRRN4	164312	0.911096	0.007724	0.0186839	LRRN4
SHE	126669	0.910868	1.34002e-08	1.33291e-07	SHE
DMRT3	58524	0.909969	0.000537263	0.00178301	DMRT3
GPSM3	63940	0.909748	9.51011e-08	7.74497e-07	GPSM3
CYSLTR1	10800	0.909443	6.56362e-05	0.000275571	CYSLTR1
MFHAS1	9258	0.907218	1.07208e-08	1.09323e-07	MFHAS1
MXRA5	25878	0.906973	1.71068e-07	1.30683e-06	MXRA5
ITGAV	3685	0.906425	2.35095e-10	3.44296e-09	ITGAV
CCDC71L	168455	0.905572	8.0371e-09	8.42677e-08	CCDC71L
SLA	6503	0.905192	1.70022e-08	1.65537e-07	SLA
OTOAP1	653786	0.904859	0.022097	0.0466878	OTOAP1
TBC1D9	23158	0.90476	4.82422e-08	4.24106e-07	TBC1D9
PABPC4L	132430	0.904351	1.38354e-06	8.52383e-06	PABPC4L
LRRC70	100130733	0.903429	4.52339e-05	0.000196926	LRRC70
VMO1	284013	0.902556	2.36777e-05	0.000109987	VMO1
CYP8B1	1582	0.902339	0.00559461	0.0140552	CYP8B1
SHISAL2A	348378	0.902002	0.00190749	0.00548815	SHISAL2A
FNDC3B	64778	0.9019	3.5484e-09	4.04907e-08	FNDC3B
LIMS3	96626	0.901839	6.32618e-07	4.24483e-06	LIMS3
MPO	4353	0.901804	0.0135108	0.0304261	MPO
PLA1A	51365	0.900642	0.00038564	0.00133074	PLA1A
SLC16A3	9123	0.900342	2.10215e-05	9.89022e-05	SLC16A3
MCTP1	79772	0.900322	3.48736e-06	1.95427e-05	MCTP1
MIR3916	100500849	0.900023	0.000152388	0.000582068	MIR3916
CENPE	1062	0.89932	8.7506e-05	0.000355014	CENPE
UACA	55075	0.899083	1.59266e-07	1.2266e-06	UACA
CCDC144B	284047	0.898219	0.00562949	0.0141341	CCDC144B
SMYD2	56950	0.897014	1.74965e-08	1.69878e-07	SMYD2
FUT8	2530	0.896897	4.92002e-10	6.73519e-09	FUT8
CBLB	868	0.89678	7.40957e-11	1.20762e-09	CBLB
HLA-DPA1	3113	0.89678	2.70295e-06	1.55081e-05	HLA-DPA1
LRRC15	131578	0.896553	0.0104632	0.0243962	LRRC15
EBI3	10148	0.896381	0.000441089	0.00149994	EBI3
DNAJB9	4189	0.896097	4.799e-07	3.29487e-06	DNAJB9
SLC25A53	401612	0.895489	4.91264e-07	3.36442e-06	SLC25A53
DTL	51514	0.895414	2.03916e-07	1.53061e-06	DTL
GPR132	29933	0.894753	2.69752e-07	1.96763e-06	GPR132
SLC2A14	144195	0.892344	0.000845248	0.00266674	SLC2A14
ST18	9705	0.892262	0.0192862	0.0415309	ST18
BMF	90427	0.892184	1.40124e-10	2.15094e-09	BMF
KLF7	8609	0.89194	1.42183e-10	2.17982e-09	KLF7
LY86	9450	0.891576	0.000372644	0.00129025	LY86
DCLK3	85443	0.891364	0.000514136	0.00171274	DCLK3
ECE1-AS1	100506801	0.889924	5.36587e-05	0.000230133	ECE1-AS1
PLEKHG1	57480	0.889729	6.9825e-10	9.21923e-09	PLEKHG1
SEL1L	6400	0.889719	9.69613e-09	9.98706e-08	SEL1L
MIR8085	102465879	0.889444	0.0162513	0.0357427	MIR8085
AKAP13	11214	0.8887	5.08751e-16	2.66254e-14	AKAP13
VAV1	7409	0.886891	9.17783e-06	4.70784e-05	VAV1
PLPP4	196051	0.88593	0.00233611	0.00655386	PLPP4
FCHSD2	9873	0.885043	9.97981e-16	4.81247e-14	FCHSD2
MEX3B	84206	0.882822	1.04455e-06	6.62319e-06	MEX3B
LMNB1	4001	0.88237	9.98214e-11	1.5797e-09	LMNB1
ITPRIPL1	150771	0.882352	1.538e-08	1.51303e-07	ITPRIPL1
CMKLR1	1240	0.88216	6.03083e-05	0.000255263	CMKLR1
SEMA6D	80031	0.881681	5.06165e-06	2.7462e-05	SEMA6D
CTSW	1521	0.881566	0.000542405	0.00179886	CTSW
PTTG2	10744	0.879616	0.0185082	0.040078	PTTG2
SIRPB1	10326	0.878968	4.73991e-07	3.26068e-06	SIRPB1
ACSM2B	348158	0.878811	0.0224345	0.047257	ACSM2B
FBXL7	23194	0.878388	3.45743e-07	2.44914e-06	FBXL7
NOTCH4	4855	0.877429	4.0179e-05	0.000176929	NOTCH4
FOXD4L5	653427	0.877136	0.0144104	0.0321928	FOXD4L5
HOXB9	3219	0.877135	0.0183369	0.0397455	HOXB9
NCAM2	4685	0.876628	9.99345e-05	0.000399885	NCAM2
MSN	4478	0.876608	1.26021e-17	9.4593e-16	MSN
AFAP1	60312	0.876582	8.32918e-12	1.67436e-10	AFAP1
SHISAL1	85352	0.876103	3.09377e-06	1.75292e-05	SHISAL1
CYBB	1536	0.876024	0.000248533	0.000897886	CYBB
XCL1	6375	0.875604	0.00471629	0.0120849	XCL1
DLG4	1742	0.875454	2.78157e-08	2.58515e-07	DLG4
GALNT18	374378	0.874092	3.19392e-11	5.67257e-10	GALNT18
FUT11	170384	0.873569	2.07246e-12	4.73799e-11	FUT11
NEU3	10825	0.873521	1.36313e-09	1.7027e-08	NEU3
GBP7	388646	0.873201	0.00920694	0.0218237	GBP7
RFLNB	359845	0.872993	6.60749e-08	5.60404e-07	RFLNB
VIP	7432	0.871773	0.00409282	0.0106882	VIP
RRM2	6241	0.870851	1.33888e-05	6.59895e-05	RRM2
PITPNC1	26207	0.870583	9.65554e-08	7.84493e-07	PITPNC1
FCGR2A	2212	0.87052	0.000100271	0.00040097	FCGR2A
AVPR1A	552	0.869191	0.000612494	0.00200102	AVPR1A
MCOLN2	255231	0.86878	4.41224e-05	0.00019253	MCOLN2
SLC6A7	6534	0.86726	0.00896503	0.0213368	SLC6A7
ERN1	2081	0.866971	8.43394e-06	4.35996e-05	ERN1
ARHGAP29	9411	0.866912	1.9956e-06	1.18114e-05	ARHGAP29
GIMAP2	26157	0.8668	4.02276e-07	2.81467e-06	GIMAP2
KCNQ1	3784	0.866721	5.86442e-05	0.000249035	KCNQ1
CYRIA	81553	0.865072	9.92163e-07	6.3188e-06	CYRIA
GLT8D2	83468	0.864934	3.86349e-05	0.000170833	GLT8D2
LILRB4	11006	0.864601	0.00153173	0.00452099	LILRB4
CORO1A	11151	0.864513	2.18397e-05	0.000102418	CORO1A
DLGAP5	9787	0.864501	0.000172012	0.000647254	DLGAP5
GIMAP7	168537	0.864313	5.48993e-07	3.7152e-06	GIMAP7
CDK17	5128	0.863775	4.26623e-11	7.38467e-10	CDK17
RASA3	22821	0.863625	2.04248e-10	3.04757e-09	RASA3
GIMAP4	55303	0.862401	1.62017e-07	1.24544e-06	GIMAP4
ROR2	4920	0.859511	2.5438e-06	1.46739e-05	ROR2
CEP85L	387119	0.858044	1.05772e-07	8.51761e-07	CEP85L
RGPD1	400966	0.857973	2.31359e-05	0.000107899	RGPD1
PHACTR2	9749	0.857855	9.42664e-07	6.05065e-06	PHACTR2
DISP2	85455	0.857609	0.0009414	0.00293983	DISP2
CLNK	116449	0.855967	0.0050834	0.0129017	CLNK
PRECSIT	283487	0.855799	1.14577e-06	7.18341e-06	PRECSIT
ARHGEF15	22899	0.855555	1.65794e-05	7.98705e-05	ARHGEF15
HHIPL1	84439	0.855444	1.02489e-05	5.19323e-05	HHIPL1
HS3ST1	9957	0.855173	2.16527e-06	1.26993e-05	HS3ST1
SIRPD	128646	0.855131	0.0168707	0.036956	SIRPD
LINC00877	285286	0.854648	0.000624285	0.00203386	LINC00877
ENTPD7	57089	0.854227	6.38543e-09	6.83815e-08	ENTPD7
LRRK1	79705	0.853833	4.6966e-10	6.47265e-09	LRRK1
TNPO1	3842	0.853766	5.10413e-08	4.45523e-07	TNPO1
S1PR4	8698	0.85372	0.00016879	0.0006363	S1PR4
KCNT2	343450	0.853476	0.000137494	0.000530712	KCNT2
B4GALT5	9334	0.853474	3.99695e-14	1.34023e-12	B4GALT5
FJX1	24147	0.853281	6.09583e-07	4.10036e-06	FJX1
DNM1P46	196968	0.852914	2.3788e-05	0.000110457	DNM1P46
SRGAP1	57522	0.852769	5.35494e-09	5.84165e-08	SRGAP1
RAB27A	5873	0.851989	5.06012e-09	5.55956e-08	RAB27A
STK17B	9262	0.851811	1.46304e-07	1.13676e-06	STK17B
REEP1	65055	0.851516	4.62995e-06	2.52988e-05	REEP1
FLT1	2321	0.851197	3.22376e-07	2.30759e-06	FLT1
TCF4	6925	0.850942	2.94728e-09	3.4301e-08	TCF4
CASP12	100506742	0.850901	0.00246694	0.00687612	CASP12
PIP4K2A	5305	0.850771	4.65958e-14	1.54137e-12	PIP4K2A
UHRF1	29128	0.850299	1.01446e-06	6.4474e-06	UHRF1
CHST2	9435	0.850189	7.97335e-05	0.000327486	CHST2
BTN1A1	696	0.849861	0.000256063	0.000922254	BTN1A1
DMXL2	23312	0.849449	5.70776e-07	3.85305e-06	DMXL2
PLCB2	5330	0.849346	2.63497e-05	0.000121183	PLCB2
LAMA4	3910	0.848968	1.75867e-05	8.42439e-05	LAMA4
CYP1B1	1545	0.848186	0.000924405	0.00289002	CYP1B1
MYH9	4627	0.848004	6.09748e-13	1.59725e-11	MYH9
KCNV2	169522	0.847918	0.00897061	0.021346	KCNV2
GALNT4	8693	0.846761	0.0209661	0.0446171	GALNT4
POT1-AS1	401398	0.846536	0.0156723	0.0346109	POT1-AS1
RTN1	6252	0.846508	1.46828e-05	7.15483e-05	RTN1
LCP1	3936	0.846508	8.22153e-07	5.37124e-06	LCP1
ANKRD36BP1	84832	0.845996	0.00563573	0.0141449	ANKRD36BP1
SIGLEC5	8778	0.845946	5.51823e-05	0.000236008	SIGLEC5
GPR55	9290	0.845935	0.00182016	0.0052597	GPR55
FGD6	55785	0.8459	8.65047e-08	7.1012e-07	FGD6
MIR378I	100616259	0.845653	0.0166279	0.0364859	MIR378I
GJA4	2701	0.844836	5.30627e-05	0.000228015	GJA4
IL32	9235	0.844283	0.000270328	0.000966948	IL32
PCDHA4	56144	0.843888	0.02067	0.0441017	PCDHA4
TENM4	26011	0.843314	4.37433e-08	3.8817e-07	TENM4
LMO2	4005	0.842656	1.52435e-06	9.28648e-06	LMO2
SEC24A	10802	0.841793	2.93837e-07	2.12206e-06	SEC24A
ACAP1	9744	0.840764	4.58398e-06	2.50811e-05	ACAP1
ELMO1	9844	0.840629	4.67605e-09	5.17931e-08	ELMO1
BMI1	648	0.840586	0.00044945	0.00152309	BMI1
ECEL1	9427	0.840349	0.00397665	0.0104415	ECEL1
MMRN1	22915	0.839843	0.00408474	0.010675	MMRN1
GIMAP6	474344	0.839785	1.09615e-06	6.91111e-06	GIMAP6
TMEM163	81615	0.839647	0.00419041	0.0109094	TMEM163
SBNO2	22904	0.839524	2.52605e-08	2.3701e-07	SBNO2
SACS	26278	0.839294	3.42917e-07	2.43333e-06	SACS
ARHGAP6	395	0.838973	7.74494e-06	4.02924e-05	ARHGAP6
HLA-DRA	3122	0.83872	0.000289703	0.00102742	HLA-DRA
GUCY1A2	2977	0.838433	0.00139338	0.00415458	GUCY1A2
LINC00888	100505687	0.838251	6.30645e-06	3.35265e-05	LINC00888
LINC01588	196913	0.838	0.0167445	0.0367057	LINC01588
PDGFA	5154	0.837892	5.30015e-09	5.79733e-08	PDGFA
ANXA2R-OT1	648987	0.837683	8.09487e-11	1.30716e-09	ANXA2R-OT1
KCNJ5	3762	0.83758	0.000135352	0.000523594	KCNJ5
STAT4	6775	0.836906	1.61509e-06	9.78344e-06	STAT4
MMP25	64386	0.836536	5.6126e-05	0.000239668	MMP25
TECTA	7007	0.836262	2.45041e-09	2.89997e-08	TECTA
KIAA1549L	25758	0.835179	7.90331e-07	5.1785e-06	KIAA1549L
BUB1	699	0.834824	3.69435e-06	2.05946e-05	BUB1
SPATA13	221178	0.834524	1.37648e-09	1.71849e-08	SPATA13
CYFIP2	26999	0.834241	2.0678e-06	1.22005e-05	CYFIP2
CEP128	145508	0.834184	4.69564e-08	4.1384e-07	CEP128
PARP9	83666	0.833623	1.30778e-07	1.02916e-06	PARP9
SIRPB2	284759	0.833449	1.6074e-05	7.77258e-05	SIRPB2
UBE2Q1-AS1	100874097	0.833261	0.00940717	0.0222275	UBE2Q1-AS1
ARL10	285598	0.83312	3.33005e-07	2.37122e-06	ARL10
MARCHF1	55016	0.833031	4.23645e-05	0.000185652	MARCHF1
XBP1	7494	0.832652	3.61158e-06	2.01698e-05	XBP1
IMPG1	3617	0.832534	0.00106115	0.00327006	IMPG1
VOPP1	81552	0.832154	3.58187e-08	3.23709e-07	VOPP1
GPR85	54329	0.831959	0.00058658	0.00192687	GPR85
KIRREL1	55243	0.831625	1.64393e-08	1.60758e-07	KIRREL1
FAM171B	165215	0.831143	2.44432e-06	1.41767e-05	FAM171B
THBS4	7060	0.830841	0.00583249	0.0145753	THBS4
TTC16	158248	0.829767	0.000316033	0.00111308	TTC16
NAIP	4671	0.82971	2.76647e-06	1.58429e-05	NAIP
UBE2J1	51465	0.829692	5.03679e-07	3.4408e-06	UBE2J1
CSNK1E	1454	0.829481	3.05521e-05	0.000138333	CSNK1E
ARSJ	79642	0.829054	3.18472e-06	1.79906e-05	ARSJ
KIF20A	10112	0.828533	4.32164e-05	0.000189048	KIF20A
IL12B	3593	0.828436	0.0205399	0.043847	IL12B
PRR29	92340	0.828215	0.000105515	0.00042009	PRR29
SLC7A7	9056	0.827381	4.23034e-06	2.33125e-05	SLC7A7
ZSWIM6	57688	0.826964	4.18082e-11	7.24705e-10	ZSWIM6
TBX2	6909	0.826761	0.0011311	0.00345869	TBX2
SLC23A2	9962	0.826723	1.11099e-11	2.16595e-10	SLC23A2
DLEU2	8847	0.826309	3.4002e-07	2.41557e-06	DLEU2
BTN2A3P	54718	0.826288	4.82748e-09	5.32781e-08	BTN2A3P
MGAT2	4247	0.825844	8.66908e-11	1.38892e-09	MGAT2
GPR161	23432	0.82531	4.06862e-12	8.72939e-11	GPR161
CDH8	1006	0.825169	0.0150163	0.0333703	CDH8
TMEM176B	28959	0.82506	0.000177384	0.000665022	TMEM176B
CCDC88A	55704	0.824789	3.15248e-06	1.78331e-05	CCDC88A
C7orf61	402573	0.824419	7.80277e-05	0.000321233	C7orf61
ERC2	26059	0.823613	0.00250699	0.00697112	ERC2
CNTNAP1	8506	0.823294	9.02496e-07	5.82941e-06	CNTNAP1
DPYSL4	10570	0.823284	0.00155045	0.00456844	DPYSL4
ATP13A3	79572	0.821506	9.72429e-08	7.89294e-07	ATP13A3
POMK	84197	0.821246	0.000211541	0.000777055	POMK
GPR19	2842	0.821235	8.47276e-07	5.5119e-06	GPR19
TFPI	7035	0.820894	0.000465921	0.0015711	TFPI
ATXN1	6310	0.820592	5.24189e-13	1.39245e-11	ATXN1
FICD	11153	0.819775	1.01827e-09	1.30175e-08	FICD
CD101	9398	0.819693	6.35716e-07	4.25747e-06	CD101
TMTC4	84899	0.819616	4.79373e-09	5.30037e-08	TMTC4
HIP1	3092	0.819167	7.26351e-12	1.4783e-10	HIP1
ARHGAP15	55843	0.818947	0.000111761	0.000441167	ARHGAP15
INPP4B	8821	0.818942	2.46248e-06	1.42719e-05	INPP4B
NCF1B	654816	0.818691	0.000169275	0.000637836	NCF1B
TCFL5	10732	0.818655	5.2605e-08	4.5722e-07	TCFL5
TSPAN15	23555	0.818371	3.11813e-05	0.000140766	TSPAN15
PALM2AKAP2	445815	0.817485	0.0111325	0.0257247	PALM2AKAP2
NGF	4803	0.816877	0.000414041	0.00141738	NGF
OSBPL7	114881	0.815916	8.72466e-06	4.49888e-05	OSBPL7
CDH6	1004	0.815503	0.0011653	0.00355087	CDH6
NABP1	64859	0.81524	7.71848e-06	4.01718e-05	NABP1
ARL11	115761	0.814838	1.68447e-07	1.28962e-06	ARL11
SMC4	10051	0.814105	2.38826e-07	1.76619e-06	SMC4
JPH3	57338	0.814066	0.000553915	0.00183331	JPH3
CARD6	84674	0.813692	7.26458e-08	6.09604e-07	CARD6
LRRC4	64101	0.81336	6.32159e-05	0.000266329	LRRC4
ARSB	411	0.813001	6.54849e-08	5.56361e-07	ARSB
PTPRN2	5799	0.812991	2.08976e-08	1.99429e-07	PTPRN2
ZFHX3	463	0.812636	1.43415e-11	2.72878e-10	ZFHX3
IL15	3600	0.812593	8.62637e-08	7.09328e-07	IL15
BMP2	650	0.812527	0.000152871	0.000583547	BMP2
ARMC9	80210	0.812358	3.19719e-12	7.02552e-11	ARMC9
TCIM	56892	0.812173	0.00167349	0.00488578	TCIM
CCL19	6363	0.810542	0.0115625	0.0265681	CCL19
PDE4D	5144	0.810424	3.30647e-08	3.01588e-07	PDE4D
PACC1	55248	0.810422	3.37683e-12	7.39379e-11	PACC1
MAP3K19	80122	0.810001	0.00345439	0.00921709	MAP3K19
MIR6840	102466747	0.809776	0.00206892	0.00589115	MIR6840
FAM43A	131583	0.809568	1.00546e-06	6.40018e-06	FAM43A
MIR6845	102466748	0.808981	0.0188556	0.0407307	MIR6845
DNMT3A	1788	0.80898	3.09694e-11	5.52028e-10	DNMT3A
GRPEL2	134266	0.808769	4.22726e-08	3.76344e-07	GRPEL2
SPON1	10418	0.807858	0.00205976	0.00587119	SPON1
SELPLG	6404	0.807644	3.39697e-05	0.000152151	SELPLG
MRC1	4360	0.807381	0.00730844	0.017798	MRC1
PILRA	29992	0.807184	1.98972e-06	1.17823e-05	PILRA
IGF1	3479	0.806734	0.00830282	0.0199289	IGF1
HEY2	23493	0.806712	0.000161407	0.000611557	HEY2
IFI16	3428	0.8061	1.82452e-07	1.3839e-06	IFI16
NCF1C	654817	0.805915	0.000121682	0.000476194	NCF1C
ZDHHC14	79683	0.805732	2.87759e-08	2.66129e-07	ZDHHC14
NOTCH1	4851	0.805197	5.08896e-09	5.58376e-08	NOTCH1
CD300E	342510	0.804916	0.00123268	0.00373025	CD300E
HPCA	3208	0.804828	0.00707398	0.0172922	HPCA
TMEM176A	55365	0.804611	0.000509527	0.00169877	TMEM176A
PITPNM1	9600	0.804485	3.6923e-08	3.32701e-07	PITPNM1
INSL3	3640	0.804426	0.00578379	0.0144698	INSL3
METTL4	64863	0.804169	9.87424e-07	6.29678e-06	METTL4
NEDD4	4734	0.803357	7.56266e-07	4.97522e-06	NEDD4
ECSCR	641700	0.802377	5.79652e-05	0.00024645	ECSCR
HS3ST3B1	9953	0.801484	9.20199e-10	1.18875e-08	HS3ST3B1
ZFHX4	79776	0.801449	0.000347374	0.00121078	ZFHX4
SKAP1	8631	0.80117	0.000240035	0.000870904	SKAP1
ZNF267	10308	0.800685	1.65134e-07	1.26663e-06	ZNF267
TMC7	79905	0.800407	4.29847e-07	2.98799e-06	TMC7
RNF122	79845	0.799607	1.35981e-08	1.35073e-07	RNF122
FHOD1	29109	0.799478	1.04478e-08	1.06851e-07	FHOD1
MTHFD1L	25902	0.798873	1.45222e-07	1.1301e-06	MTHFD1L
TLNRD1	59274	0.798857	1.41777e-06	8.69981e-06	TLNRD1
SKIL	6498	0.798451	1.10865e-06	6.97749e-06	SKIL
HERC2P3	283755	0.798302	1.4335e-05	7.01461e-05	HERC2P3
RAI14	26064	0.797257	6.49952e-08	5.52583e-07	RAI14
MROCKI	285758	0.797229	0.00398606	0.0104599	MROCKI
NCF1	653361	0.797073	0.00014269	0.000547924	NCF1
SEPTIN6	23157	0.797059	8.60436e-10	1.11802e-08	SEPTIN6
RIMBP3C	150221	0.796924	0.00131431	0.00394325	RIMBP3C
NPL	80896	0.796822	2.76992e-05	0.000126772	NPL
AEN	64782	0.796779	2.02283e-09	2.44704e-08	AEN
TTYH3	80727	0.796758	1.38987e-06	8.55211e-06	TTYH3
MAN1A1	4121	0.79671	6.57515e-05	0.00027597	MAN1A1
TNFSF8	944	0.79653	0.000288346	0.00102275	TNFSF8
PCDHB7	56129	0.796257	5.93016e-05	0.000251565	PCDHB7
ZNF697	90874	0.795474	2.60726e-09	3.07226e-08	ZNF697
ARHGAP31	57514	0.795403	1.9798e-10	2.95585e-09	ARHGAP31
TLR4	7099	0.795386	0.000651724	0.00211315	TLR4
RNF182	221687	0.794692	0.00414393	0.0107987	RNF182
FAM124B	79843	0.794534	0.000210737	0.000774663	FAM124B
TCAM1P	146771	0.794504	0.00418391	0.0108959	TCAM1P
LPAL2	80350	0.794471	5.66038e-05	0.000241456	LPAL2
RGPD2	729857	0.794038	0.000103389	0.000412161	RGPD2
KCNMA1	3778	0.792976	9.66993e-06	4.92628e-05	KCNMA1
LRRC63	220416	0.792948	0.00365022	0.00967126	LRRC63
LINC00622	644242	0.792487	0.00444998	0.0114792	LINC00622
DTX3L	151636	0.792407	7.64405e-09	8.05596e-08	DTX3L
ABL2	27	0.79237	6.44693e-09	6.89799e-08	ABL2
ITGB1	3688	0.791986	3.9697e-06	2.20046e-05	ITGB1
LPCAT1	79888	0.791106	9.72075e-08	7.89268e-07	LPCAT1
GNA14	9630	0.79081	6.67852e-07	4.4448e-06	GNA14
PTPRJ	5795	0.789968	1.95519e-08	1.87608e-07	PTPRJ
SOCS2	8835	0.789735	9.73456e-07	6.21902e-06	SOCS2
SELP	6403	0.789608	0.000954155	0.00297258	SELP
ABCG4	64137	0.789525	0.00683777	0.01679	ABCG4
SDC3	9672	0.789426	2.09207e-06	1.232e-05	SDC3
ADAM23	8745	0.788454	0.00270962	0.00746856	ADAM23
CCDC88C	440193	0.788042	4.84852e-09	5.34863e-08	CCDC88C
ZNF281	23528	0.787868	6.33692e-06	3.36448e-05	ZNF281
FAM162B	221303	0.787382	5.90747e-05	0.000250689	FAM162B
PDGFRB	5159	0.78646	0.00021808	0.000799041	PDGFRB
OSBPL10	114884	0.786355	2.6781e-12	5.97581e-11	OSBPL10
POPDC2	64091	0.78631	0.000108411	0.00042974	POPDC2
BIRC3	330	0.786199	3.86432e-05	0.000170839	BIRC3
GALNT8	26290	0.785952	0.00936785	0.022158	GALNT8
VGLL4	9686	0.785854	1.633e-09	2.00109e-08	VGLL4
LHFPL2	10184	0.785704	1.27059e-05	6.29892e-05	LHFPL2
SULT1B1	27284	0.785185	0.011592	0.026626	SULT1B1
C17orf67	339210	0.784983	2.20611e-07	1.64587e-06	C17orf67
CR1	1378	0.784569	0.0191542	0.0412948	CR1
ROBO4	54538	0.784496	0.000170167	0.000640997	ROBO4
KLHL14	57565	0.784135	0.00196269	0.00562874	KLHL14
COL3A1	1281	0.784046	0.00844822	0.0202422	COL3A1
FAM171A1	221061	0.784044	1.41559e-08	1.40047e-07	FAM171A1
VPS13C	54832	0.784004	5.04016e-07	3.44215e-06	VPS13C
MIR9-3HG	254559	0.783876	0.00219722	0.0062125	MIR9-3HG
HERPUD1	9709	0.7834	2.19107e-07	1.63713e-06	HERPUD1
APOL4	80832	0.783265	0.000139588	0.000537525	APOL4
SH3RF3	344558	0.782692	2.00627e-07	1.50778e-06	SH3RF3
ALOX5	240	0.782611	4.18709e-05	0.000183686	ALOX5
ACKR2	1238	0.782237	0.00407503	0.0106535	ACKR2
PLAAT4	5920	0.781861	9.50552e-05	0.000382105	PLAAT4
CCL8	6355	0.781198	0.00776174	0.0187604	CCL8
CENPK	64105	0.78085	0.00031903	0.00112299	CENPK
PDE4B	5142	0.780154	2.56404e-05	0.000118231	PDE4B
ZEB1	6935	0.780101	9.01388e-05	0.000364011	ZEB1
HLA-DQA2	3118	0.779967	0.00591278	0.0147489	HLA-DQA2
TLR1	7096	0.779866	7.75806e-05	0.000319553	TLR1
FCRLB	127943	0.779865	1.17265e-05	5.86801e-05	FCRLB
CMPK2	129607	0.779424	0.00807361	0.0194396	CMPK2
SNED1	25992	0.779167	5.58828e-05	0.000238713	SNED1
ADAM8	101	0.778246	3.85989e-05	0.000170704	ADAM8
LACC1	144811	0.777254	3.13167e-06	1.77276e-05	LACC1
SIDT1	54847	0.777106	7.56246e-06	3.94518e-05	SIDT1
CCNYL6	641367	0.777096	7.25121e-05	0.000301152	CCNYL6
TBC1D30	23329	0.775753	4.13705e-08	3.68581e-07	TBC1D30
AMPH	273	0.775631	0.000522091	0.00173688	AMPH
FMO1	2326	0.774944	0.0114739	0.0263993	FMO1
BAHCC1	57597	0.774651	1.4937e-06	9.11243e-06	BAHCC1
S1PR1	1901	0.774612	6.54008e-05	0.000274686	S1PR1
FNDC3A	22862	0.774522	4.73944e-07	3.26068e-06	FNDC3A
FLI1	2313	0.774478	1.80787e-07	1.37254e-06	FLI1
LINC00954	400946	0.774387	0.00100895	0.0031233	LINC00954
RAP2B	5912	0.774266	4.61457e-11	7.92614e-10	RAP2B
ARHGAP18	93663	0.773494	1.73061e-05	8.29808e-05	ARHGAP18
KIAA1217	56243	0.773354	2.4315e-10	3.54349e-09	KIAA1217
ZNF660	285349	0.773198	2.78465e-05	0.000127351	ZNF660
DTX4	23220	0.773149	1.55944e-05	7.57049e-05	DTX4
FBXO39	162517	0.772848	0.00599769	0.0149243	FBXO39
TGFBR1	7046	0.772239	2.91127e-06	1.65717e-05	TGFBR1
C1QC	714	0.771474	0.00871059	0.0208018	C1QC
ZNF154	7710	0.77143	4.60884e-06	2.52059e-05	ZNF154
STAB1	23166	0.771156	0.000639147	0.00207869	STAB1
NCAPG	64151	0.770634	0.000129064	0.000501644	NCAPG
ACSL5	51703	0.770268	1.84399e-07	1.3965e-06	ACSL5
XRCC2	7516	0.769335	0.00127764	0.0038464	XRCC2
ENKUR	219670	0.768712	0.000673631	0.00217499	ENKUR
AGPAT5	55326	0.768467	1.74608e-07	1.33139e-06	AGPAT5
BVES	11149	0.767943	0.000122575	0.000478925	BVES
SLC35B4	84912	0.767395	5.89486e-11	9.81671e-10	SLC35B4
OSBPL3	26031	0.766882	1.33825e-10	2.06197e-09	OSBPL3
KLKB1	3818	0.765674	0.00627775	0.0155565	KLKB1
HAGLR	401022	0.765037	1.5564e-05	7.55873e-05	HAGLR
SCN4B	6330	0.76486	0.000351499	0.00122359	SCN4B
PARP8	79668	0.764676	1.77059e-07	1.34841e-06	PARP8
PDE7B	27115	0.763643	3.08431e-05	0.000139444	PDE7B
LPIN2	9663	0.7635	2.87228e-09	3.35077e-08	LPIN2
AJM1	389813	0.763242	0.00217601	0.00615891	AJM1
NRP1	8829	0.762733	1.05005e-06	6.6564e-06	NRP1
MKI67	4288	0.761862	8.75735e-05	0.000355068	MKI67
RASIP1	54922	0.761795	1.60659e-05	7.77017e-05	RASIP1
STAMBPL1	57559	0.761371	5.99072e-10	8.05917e-09	STAMBPL1
LILRB2	10288	0.760477	0.0111207	0.0257022	LILRB2
MYO5A	4644	0.760297	9.64652e-08	7.84019e-07	MYO5A
ATP8B2	57198	0.759969	1.33833e-07	1.05084e-06	ATP8B2
TMEM150B	284417	0.759884	0.0044376	0.0114557	TMEM150B
ABCC4	10257	0.75806	7.24206e-07	4.78869e-06	ABCC4
KNTC1	9735	0.757881	2.11504e-07	1.58467e-06	KNTC1
LAT2	7462	0.757796	2.78869e-06	1.59516e-05	LAT2
PPP1R18	170954	0.757695	1.49293e-09	1.84977e-08	PPP1R18
ANKRD61	100310846	0.757632	0.000636498	0.00207145	ANKRD61
MIR4435-2HG	541471	0.75733	0.00127816	0.00384683	MIR4435-2HG
APAF1	317	0.757119	2.62897e-08	2.45447e-07	APAF1
KLHL33	123103	0.757057	0.00344598	0.00919765	KLHL33
VLDLR	7436	0.756691	1.16836e-05	5.84896e-05	VLDLR
ZNF101	94039	0.755947	1.03267e-11	2.03754e-10	ZNF101
DPYD	1806	0.755885	3.67474e-07	2.58814e-06	DPYD
SPSB1	80176	0.755065	1.55606e-08	1.52835e-07	SPSB1
TRPC6	7225	0.755065	3.21668e-05	0.000144762	TRPC6
PLA2G4C	8605	0.75446	1.93748e-05	9.19323e-05	PLA2G4C
ENTPD4	9583	0.754263	4.56851e-13	1.23224e-11	ENTPD4
SLC38A4	55089	0.754095	0.00101611	0.0031427	SLC38A4
SPHK1	8877	0.753993	0.000113059	0.000445718	SPHK1
EDEM1	9695	0.753874	2.62211e-10	3.78984e-09	EDEM1
CD74	972	0.753356	3.17389e-06	1.79417e-05	CD74
PCDHGA12	26025	0.753133	0.00523065	0.0132425	PCDHGA12
IL27RA	9466	0.753123	7.42703e-06	3.88278e-05	IL27RA
C2CD4B	388125	0.753008	0.00913788	0.0216872	C2CD4B
IKBIP	121457	0.752595	5.83284e-05	0.000247865	IKBIP
CREB3L2	64764	0.752472	5.66435e-09	6.13014e-08	CREB3L2
GAB3	139716	0.752193	9.68027e-07	6.18756e-06	GAB3
SH3PXD2B	285590	0.751587	3.15095e-09	3.64296e-08	SH3PXD2B
SLC2A5	6518	0.751537	0.000157703	0.000599379	SLC2A5
SEMA5B	54437	0.751225	0.00129244	0.00388523	SEMA5B
UTRN	7402	0.75113	7.02352e-08	5.9221e-07	UTRN
HYOU1	10525	0.75088	1.60476e-09	1.97142e-08	HYOU1
ERFL	390937	0.750603	0.0106389	0.0247565	ERFL
CD86	942	0.750504	0.000198115	0.000733445	CD86
FGD5	152273	0.749745	2.4584e-05	0.000113749	FGD5
DOCK6	57572	0.749104	1.45263e-07	1.1301e-06	DOCK6
LGALS9	3965	0.748788	0.000167867	0.0006335	LGALS9
TAP2	6891	0.748285	3.37417e-07	2.40079e-06	TAP2
LRRC8C	84230	0.748034	2.88887e-07	2.09043e-06	LRRC8C
GARRE1	9710	0.747808	6.58958e-11	1.08843e-09	GARRE1
SHCBP1	79801	0.747567	1.5033e-05	7.31387e-05	SHCBP1
BMP6	654	0.746168	0.000200756	0.000741879	BMP6
SRGN	5552	0.746125	0.000853718	0.00268992	SRGN
RAB15	376267	0.745504	2.8313e-06	1.61878e-05	RAB15
GGT5	2687	0.745155	0.00107439	0.00330463	GGT5
MYBL1	4603	0.744968	4.6109e-06	2.52059e-05	MYBL1
RARA-AS1	101929693	0.744923	0.00403238	0.010563	RARA-AS1
SERPINE2	5270	0.744782	0.0156036	0.0344913	SERPINE2
CEP55	55165	0.744516	0.000519598	0.00172906	CEP55
LRRTM2	26045	0.743481	0.000851507	0.00268399	LRRTM2
LRCH2	57631	0.743231	0.00137206	0.00409558	LRCH2
SLC45A3	85414	0.742662	1.17335e-05	5.86947e-05	SLC45A3
SIX2	10736	0.742043	0.00904825	0.0215099	SIX2
ABCG2	9429	0.741389	3.10836e-05	0.000140412	ABCG2
SGO1	151648	0.741122	1.89491e-05	9.01194e-05	SGO1
ZBED6	100381270	0.741121	0.0199804	0.04285	ZBED6
ECI2-DT	100507506	0.740963	0.000950643	0.00296374	ECI2-DT
SGO2	151246	0.73995	0.000176367	0.000662116	SGO2
FAT4	79633	0.739914	0.000129526	0.00050312	FAT4
PECAM1	5175	0.739482	7.98995e-06	4.14792e-05	PECAM1
FOXF2	2295	0.738872	0.000277344	0.000989016	FOXF2
ARHGAP30	257106	0.738794	1.05202e-05	5.31531e-05	ARHGAP30
TPTE2	93492	0.738532	0.00877269	0.0209339	TPTE2
CLEC1A	51267	0.73846	1.27924e-05	6.33683e-05	CLEC1A
NLRC4	58484	0.737776	4.34129e-05	0.000189705	NLRC4
SPCS3	60559	0.737523	2.0813e-06	1.22684e-05	SPCS3
SLFN12	55106	0.737201	1.40703e-08	1.39312e-07	SLFN12
TPP1	1200	0.736739	6.64332e-10	8.82838e-09	TPP1
LBX2	85474	0.736478	0.000637927	0.00207554	LBX2
TOP2A	7153	0.736422	0.000523312	0.00174	TOP2A
BHLHE22	27319	0.736269	0.000667709	0.00215899	BHLHE22
ZNF608	57507	0.736038	8.07363e-06	4.18604e-05	ZNF608
LDB2	9079	0.735974	0.000278971	0.00099424	LDB2
KCNJ15	3772	0.735966	0.000647265	0.00210145	KCNJ15
GBP3	2635	0.735945	2.92106e-06	1.66159e-05	GBP3
PANDAR	101154753	0.735729	0.000458613	0.0015505	PANDAR
PGM5P2	595135	0.735659	1.14408e-05	5.74145e-05	PGM5P2
ZNF275	10838	0.735131	5.18255e-07	3.52663e-06	ZNF275
RHOBTB1	9886	0.734365	2.08313e-08	1.98952e-07	RHOBTB1
AKT3	10000	0.733944	0.000113935	0.000448738	AKT3
C2	717	0.733795	0.00353797	0.0094084	C2
CADPS2	93664	0.733551	2.31922e-07	1.72032e-06	CADPS2
FBXO16	157574	0.733511	0.011649	0.0267444	FBXO16
CEND1	51286	0.733426	0.0016706	0.00487922	CEND1
RBM38	55544	0.733316	7.15365e-07	4.73406e-06	RBM38
ZNF730	100129543	0.733236	0.0220123	0.0465409	ZNF730
TESPA1	9840	0.73286	0.000380386	0.00131446	TESPA1
INHBE	83729	0.732035	0.00426812	0.0110823	INHBE
IGDCC4	57722	0.731866	0.000608	0.00198872	IGDCC4
PRKACB	5567	0.731856	4.54897e-05	0.000197934	PRKACB
MEGF6	1953	0.731112	0.000123461	0.00048208	MEGF6
USHBP1	83878	0.731006	0.000501278	0.00167628	USHBP1
LINC01801	400685	0.7309	0.00271183	0.0074727	LINC01801
TRPM2	7226	0.73077	0.000492364	0.00165074	TRPM2
HVCN1	84329	0.730639	1.65272e-07	1.26729e-06	HVCN1
MAN2A1	4124	0.730252	3.67596e-07	2.58825e-06	MAN2A1
ZBTB38	253461	0.729366	1.06354e-06	6.72973e-06	ZBTB38
PRDM1	639	0.729303	6.2363e-06	3.31895e-05	PRDM1
TOX2	84969	0.729064	0.00109386	0.00335569	TOX2
NES	10763	0.728781	0.000593283	0.00194629	NES
ENG	2022	0.72866	0.000137732	0.000531378	ENG
KCNAB2	8514	0.728319	2.49191e-06	1.44153e-05	KCNAB2
HAVCR2	84868	0.728054	6.94342e-05	0.000289989	HAVCR2
BMP8B	656	0.727734	0.000417913	0.00142887	BMP8B
PTPRG	5793	0.727665	1.53351e-05	7.45201e-05	PTPRG
PCNX1	22990	0.727662	1.90727e-10	2.85277e-09	PCNX1
RNF17	56163	0.727597	0.0102988	0.0240495	RNF17
CALD1	800	0.727501	1.86988e-06	1.11481e-05	CALD1
LYSMD2	256586	0.727181	4.99801e-08	4.37348e-07	LYSMD2
JAKMIP2	9832	0.726412	0.000969558	0.00301543	JAKMIP2
TEX41	401014	0.725935	0.0072998	0.0177857	TEX41
FHL3	2275	0.725503	6.46818e-07	4.32357e-06	FHL3
ITGB2-AS1	100505746	0.725476	0.000970057	0.00301622	ITGB2-AS1
FAM167B	84734	0.724254	0.0022402	0.00631801	FAM167B
WASHC4	23325	0.723862	5.55239e-06	2.98148e-05	WASHC4
PTGER4	5734	0.723727	2.08124e-06	1.22684e-05	PTGER4
ERAP2	64167	0.723262	0.0141642	0.0317151	ERAP2
ACOT11	26027	0.722837	8.2253e-05	0.000336371	ACOT11
NEK6	10783	0.722501	8.23421e-09	8.60037e-08	NEK6
SOCS3	9021	0.722471	0.0197285	0.0423711	SOCS3
ADCY3	109	0.722419	2.8423e-08	2.6356e-07	ADCY3
BCAR1	9564	0.722373	3.66922e-06	2.04684e-05	BCAR1
DYRK2	8445	0.722207	1.15181e-11	2.23842e-10	DYRK2
EFCAB10	100130771	0.722045	0.00944481	0.0222971	EFCAB10
PKD1L3	342372	0.721547	0.00127386	0.00383691	PKD1L3
CSGALNACT2	55454	0.721466	2.26596e-07	1.68539e-06	CSGALNACT2
LINC02875	388407	0.720623	0.0136864	0.0307658	LINC02875
DEPP1	11067	0.72002	0.00166987	0.00487765	DEPP1
KLRC3	3823	0.71992	0.0192875	0.0415309	KLRC3
CADPS	8618	0.719486	0.0126301	0.0286698	CADPS
LINGO1	84894	0.719479	0.00157832	0.00464007	LINGO1
VIM-AS1	100507347	0.718947	4.05637e-05	0.000178461	VIM-AS1
C1QB	713	0.717389	0.0158899	0.0350232	C1QB
STIL	6491	0.717208	2.21114e-05	0.000103573	STIL
ADAT1	23536	0.715721	4.76088e-08	4.18988e-07	ADAT1
ZFPM2	23414	0.715046	4.39475e-05	0.000191904	ZFPM2
SLC12A5	57468	0.714223	0.00405779	0.0106221	SLC12A5
RBM12B	389677	0.714132	2.25979e-09	2.69255e-08	RBM12B
SH2D1B	117157	0.713959	0.0203731	0.0435439	SH2D1B
RTP4	64108	0.712589	7.66741e-05	0.000316191	RTP4
NDC80	10403	0.712392	0.000255503	0.000920493	NDC80
TRIM69	140691	0.712374	0.00386641	0.0101771	TRIM69
CRACD	57482	0.71237	0.00754485	0.0183083	CRACD
GNL3L	54552	0.712337	9.3945e-12	1.86862e-10	GNL3L
ADAM10	102	0.712269	1.39828e-06	8.59886e-06	ADAM10
CBL	867	0.712162	8.80818e-10	1.14209e-08	CBL
MMP14	4323	0.711637	1.18581e-07	9.42849e-07	MMP14
TGFBR2	7048	0.711566	7.98983e-06	4.14792e-05	TGFBR2
GRIN2A	2903	0.711212	0.0131818	0.0297707	GRIN2A
CDC42BPA	8476	0.710969	1.67406e-08	1.63444e-07	CDC42BPA
ALPL	249	0.710925	0.00294625	0.00803507	ALPL
HIF1A	3091	0.710272	0.000885883	0.00277985	HIF1A
IGFBP7-AS1	255130	0.709848	0.0095623	0.0225311	IGFBP7-AS1
SUSD6	9766	0.709621	2.16358e-09	2.59237e-08	SUSD6
MAP1S	55201	0.709353	2.88926e-05	0.000131669	MAP1S
C2CD4A	145741	0.708754	0.0181029	0.0392938	C2CD4A
SMAD7	4092	0.708411	2.99826e-06	1.70234e-05	SMAD7
SPRED3	399473	0.70783	6.88357e-05	0.000287587	SPRED3
HYAL2	8692	0.707809	3.15422e-06	1.78388e-05	HYAL2
SMAD9	4093	0.707796	1.01577e-05	5.15446e-05	SMAD9
XRRA1	143570	0.707516	1.01783e-05	5.16151e-05	XRRA1
TMEM44	93109	0.707379	7.43914e-05	0.000308071	TMEM44
ITGA9-AS1	101928153	0.707126	0.000124948	0.000487189	ITGA9-AS1
PRKCH	5583	0.706997	6.69258e-10	8.88903e-09	PRKCH
NCOA7	135112	0.706668	1.49245e-05	7.26541e-05	NCOA7
TXLNB	167838	0.70622	2.84693e-06	1.62545e-05	TXLNB
KIF4A	24137	0.705853	2.83507e-05	0.000129512	KIF4A
MAP4K2	5871	0.705669	5.0215e-05	0.000216727	MAP4K2
TXNDC11	51061	0.705437	1.39332e-08	1.38011e-07	TXNDC11
DUSP6	1848	0.705249	1.83836e-06	1.09841e-05	DUSP6
PDIA4	9601	0.704832	4.43361e-09	4.942e-08	PDIA4
TRAF3	7187	0.70476	1.71984e-11	3.23972e-10	TRAF3
GRAMD1B	57476	0.704259	1.70117e-05	8.17289e-05	GRAMD1B
CDC7	8317	0.704104	3.18381e-06	1.79895e-05	CDC7
FGD2	221472	0.703029	2.33049e-05	0.000108501	FGD2
GNA12	2768	0.702722	7.71788e-09	8.1233e-08	GNA12
KLHL2	11275	0.702313	6.19145e-08	5.28956e-07	KLHL2
MYO7A	4647	0.702307	0.00159132	0.00467437	MYO7A
MPEG1	219972	0.70225	0.000523094	0.00173951	MPEG1
DENND4A	10260	0.70189	2.62938e-07	1.92651e-06	DENND4A
ADCY4	196883	0.701877	0.000188996	0.00070297	ADCY4
DLC1	10395	0.701686	3.71836e-05	0.00016498	DLC1
DHH	50846	0.701667	0.00440505	0.0113836	DHH
GIT2	9815	0.701145	1.26442e-11	2.43413e-10	GIT2
PRRX1	5396	0.701048	0.000623631	0.00203227	PRRX1
GALNT5	11227	0.700877	0.0223271	0.0471009	GALNT5
SOGA3	387104	0.699714	0.0016763	0.00489178	SOGA3
SLC44A3-AS1	101928079	0.699236	0.00018407	0.000687042	SLC44A3-AS1
MATN3	4148	0.699212	0.00112089	0.00343132	MATN3
ASPHD1	253982	0.698852	0.00123082	0.00372554	ASPHD1
MPHOSPH9	10198	0.697827	4.66658e-07	3.21655e-06	MPHOSPH9
ELF4	2000	0.697701	1.09344e-11	2.1359e-10	ELF4
YEATS2	55689	0.697376	5.60422e-12	1.1687e-10	YEATS2
ITGB7	3695	0.697328	2.69715e-05	0.000123834	ITGB7
CASP8	841	0.696078	8.19757e-09	8.56574e-08	CASP8
KIF17	57576	0.695705	0.000442221	0.00150274	KIF17
SGSM1	129049	0.695062	0.000384072	0.00132644	SGSM1
CCDC184	387856	0.694912	0.0134211	0.0302526	CCDC184
SVIL	6840	0.69474	1.53453e-08	1.51023e-07	SVIL
ALDH1A3-AS1	101927751	0.694431	0.00143718	0.00426395	ALDH1A3-AS1
KCNJ8	3764	0.694219	0.00109794	0.00336598	KCNJ8
LINC00189	193629	0.693995	0.020377	0.0435484	LINC00189
CNTRL	11064	0.693852	2.32044e-09	2.75679e-08	CNTRL
GPR176	11245	0.693371	0.00021803	0.000798978	GPR176
IQSEC1	9922	0.693252	3.70381e-08	3.33492e-07	IQSEC1
SLC38A1	81539	0.692781	2.82991e-05	0.0001293	SLC38A1
SNAI2	6591	0.69257	4.47393e-06	2.45392e-05	SNAI2
HELLS	3070	0.692319	1.28161e-05	6.3473e-05	HELLS
MAP9	79884	0.692297	0.000378807	0.00130955	MAP9
RASSF4	83937	0.692096	3.54654e-05	0.000158417	RASSF4
ANXA2R-AS1	153684	0.691584	3.88934e-06	2.15925e-05	ANXA2R-AS1
ZNF683	257101	0.690811	0.0149347	0.0332191	ZNF683
DKK3	27122	0.690637	4.5277e-07	3.12697e-06	DKK3
ROCK1	6093	0.690512	1.45655e-07	1.13243e-06	ROCK1
PLCL2	23228	0.690285	2.97296e-05	0.000135107	PLCL2
FAM151A	338094	0.689783	0.00581911	0.0145463	FAM151A
LINGO3	645191	0.689355	0.0053273	0.0134553	LINGO3
RNASE6	6039	0.688957	0.00279294	0.00766465	RNASE6
CENPF	1063	0.688575	0.000345153	0.00120441	CENPF
DCBLD1	285761	0.687837	1.21054e-09	1.52529e-08	DCBLD1
WWC2	80014	0.687778	9.76131e-07	6.23448e-06	WWC2
ACTN1	87	0.687158	1.67717e-07	1.28443e-06	ACTN1
GOLM1	51280	0.687037	1.67502e-05	8.06143e-05	GOLM1
RASSF2	9770	0.686162	3.34811e-05	0.000150072	RASSF2
PTGDR	5729	0.686151	7.94164e-05	0.000326293	PTGDR
COLEC11	78989	0.685756	0.0175566	0.0382468	COLEC11
LBR	3930	0.685515	3.05198e-08	2.80775e-07	LBR
SP110	3431	0.685144	2.25018e-07	1.67467e-06	SP110
MCM10	55388	0.684692	0.000234731	0.000853804	MCM10
CKAP2L	150468	0.684146	0.00107825	0.00331526	CKAP2L
CYSLTR2	57105	0.683915	0.00495725	0.012622	CYSLTR2
CD163	9332	0.683169	0.0144492	0.0322649	CD163
BTK	695	0.68302	3.65289e-05	0.000162428	BTK
HIVEP1	3096	0.682926	7.52596e-08	6.28529e-07	HIVEP1
HLA-DMB	3109	0.682828	0.000123656	0.000482763	HLA-DMB
ZNF70	7621	0.682524	1.57724e-07	1.21573e-06	ZNF70
SYNJ2	8871	0.682365	2.23424e-08	2.11981e-07	SYNJ2
GOLIM4	27333	0.681641	3.22771e-06	1.82082e-05	GOLIM4
TRIO	7204	0.681112	1.09147e-08	1.11024e-07	TRIO
ZNF521	25925	0.681061	2.87102e-05	0.000130984	ZNF521
ATP8B1	5205	0.680846	5.17557e-08	4.51276e-07	ATP8B1
FZD2	2535	0.680401	0.00015805	0.00060023	FZD2
RASAL2	9462	0.680052	4.78406e-07	3.28737e-06	RASAL2
ADA	100	0.679853	4.06457e-05	0.00017879	ADA
ST3GAL1	6482	0.679737	3.36395e-05	0.000150754	ST3GAL1
GLIS2	84662	0.679444	0.000377773	0.00130653	GLIS2
PUS7L	83448	0.67935	0.000122041	0.000477295	PUS7L
EDEM3	80267	0.678829	3.76891e-06	2.09721e-05	EDEM3
SLC30A7	148867	0.678419	4.42745e-07	3.0655e-06	SLC30A7
SIX4	51804	0.678156	0.00346152	0.00923409	SIX4
TRIM38	10475	0.678105	1.6161e-10	2.45314e-09	TRIM38
HLA-DPB1	3115	0.67803	0.000190928	0.000709442	HLA-DPB1
RFTN1	23180	0.677887	2.95553e-06	1.67925e-05	RFTN1
HCK	3055	0.677479	5.62868e-05	0.00024023	HCK
ZNF792	126375	0.677475	1.47309e-08	1.45326e-07	ZNF792
ZCCHC18	644353	0.677411	0.00017099	0.000643702	ZCCHC18
POGLUT2	79070	0.676868	1.34396e-05	6.62001e-05	POGLUT2
NRG1	3084	0.676302	0.0036345	0.00963483	NRG1
SHOX2	6474	0.676165	0.000619242	0.00202091	SHOX2
ZSCAN20	7579	0.676028	6.62343e-09	7.07143e-08	ZSCAN20
CENPI	2491	0.675866	8.9328e-05	0.000361093	CENPI
[truncated: 8,538 more rows]

## Sheet: 5-C2vsC4
	entrez	log2FoldChange	pvalue	padj
DMP1	1758	6.35943	1.44682e-14	7.24362e-13
SLC18A3	6572	5.97477	2.06355e-07	1.78667e-06
CACNG5	27091	5.19874	1.58694e-08	1.80604e-07
K4	HHV8GK18_gp13	5.04041	1.32471e-08	1.53406e-07
K5	HHV8GK18_gp16	4.92912	1.01053e-10	1.98646e-09
K3	HHV8GK18_gp11	4.80868	4.71469e-10	7.76995e-09
ORF24	HHV8GK18_gp27	4.4987	2.33047e-06	1.56601e-05
vIRF-3	HHV8GK18_gp64	4.3241	1.24665e-09	1.84264e-08
K8	HHV8GK18_gp54	4.24025	9.94374e-10	1.49801e-08
RFPL1	5988	4.23494	1.83395e-08	2.05454e-07
K4.2	HHV8GK18_gp14	4.22816	7.88342e-07	5.90445e-06
ORF36	HHV8GK18_gp40	4.22266	1.93021e-08	2.14513e-07
ORF11	HHV8GK18_gp08	4.18796	1.26433e-10	2.42827e-09
K8.1	HHV8GK18_gp55	4.17067	6.06122e-11	1.2596e-09
ORF10	HHV8GK18_gp07	4.11818	1.2891e-10	2.46264e-09
IBSP	3381	4.07027	1.17405e-07	1.0795e-06
ORF4	HHV8GK18_gp02	3.94693	3.32448e-07	2.74663e-06
ORF6	HHV8GK18_gp03	3.87446	1.78344e-08	2.00204e-07
GRM8	2918	3.87138	1.3286e-14	6.73239e-13
ORF50	HHV8GK18_gp52	3.84948	2.55916e-15	1.54306e-13
ORF65	HHV8GK18_gp76	3.84062	1.13217e-09	1.69137e-08
ORF57	HHV8GK18_gp61	3.7963	9.86092e-09	1.17755e-07
ORF49	HHV8GK18_gp53	3.78343	9.73382e-11	1.91643e-09
ORF39	HHV8GK18_gp43	3.76069	2.66073e-07	2.24635e-06
ESM1	11082	3.67566	1.02811e-10	2.01767e-09
ORF7	HHV8GK18_gp04	3.67166	9.80654e-08	9.16117e-07
ORF75	HHV8GK18_gp86	3.66718	1.30854e-07	1.18791e-06
COL22A1	169044	3.6661	2.41087e-12	7.18194e-11
vIRF-4	HHV8GK18_gp63	3.55546	1.02678e-07	9.55647e-07
ORF27	HHV8GK18_gp31	3.52682	4.24061e-07	3.41797e-06
ORF61	HHV8GK18_gp66	3.41433	3.27662e-07	2.71156e-06
ORF45	HHV8GK18_gp51	3.35022	4.56429e-09	5.89831e-08
ORF22	HHV8GK18_gp26	3.32027	5.73935e-06	3.45559e-05
K6	HHV8GK18_gp17	3.31449	6.74808e-05	0.000310288
K13	HHV8GK18_gp80	3.29829	1.59855e-08	1.81597e-07
ORF58	HHV8GK18_gp68	3.29092	1.36014e-06	9.65106e-06
vIRF-2	HHV8GK18_gp65	3.27431	2.84254e-06	1.86452e-05
PPEF1	5475	3.2544	7.90443e-19	1.38648e-16
ORF48	HHV8GK18_gp48	3.25277	2.49055e-08	2.70317e-07
ORF43	HHV8GK18_gp45	3.24875	1.14369e-05	6.38628e-05
ORF33	HHV8GK18_gp37	3.23937	2.49655e-05	0.000128269
HMHB1	57824	3.23698	3.00209e-11	6.72908e-10
K12	HHV8GK18_gp79	3.22768	3.00185e-06	1.95522e-05
CHAT	1103	3.17902	0.000104368	0.000458069
IGFL1	374918	3.17389	5.35561e-08	5.34346e-07
PMF1-BGLAP	100527963	3.09399	5.22066e-08	5.22337e-07
ORF8	HHV8GK18_gp05	3.07187	2.28335e-05	0.000118603
MIR3648-1	100500862	3.03033	9.04559e-06	5.17071e-05
ORF37	HHV8GK18_gp41	3.02297	4.70192e-06	2.91062e-05
K2	HHV8GK18_gp10	3.01095	2.18698e-05	0.000114188
ORF44	HHV8GK18_gp47	3.00116	3.22027e-06	2.07966e-05
K15	HHV8GK18_gp85	2.98449	0.000121141	0.00052317
ORF26	HHV8GK18_gp30	2.97979	0.000130582	0.000558749
CNGB1	1258	2.97699	4.41317e-07	3.53321e-06
COL18A1-AS1	378832	2.93526	1.7552e-10	3.22296e-09
ORF35	HHV8GK18_gp39	2.93458	0.000223249	0.000899704
ORF42	HHV8GK18_gp46	2.92913	2.80928e-05	0.000142555
ORF52	HHV8GK18_gp56	2.92214	0.000131942	0.000563797
ORF40	HHV8GK18_gp44	2.88147	7.12796e-06	4.18714e-05
LCN1	3933	2.87963	6.7939e-07	5.17811e-06
MDS2	259283	2.87756	5.46094e-11	1.15203e-09
LINC01583	101929690	2.87661	1.6393e-07	1.45488e-06
KCNF1	3754	2.85738	9.75746e-12	2.50508e-10
ORF74	HHV8GK18_gp84	2.84039	3.10729e-06	2.01552e-05
K7	HHV8GK18_gp18	2.83975	4.70611e-05	0.000225446
TMEM235	283999	2.81061	9.07245e-08	8.55184e-07
LINC02685	221122	2.80016	0.000864593	0.0030045
ORF9	HHV8GK18_gp06	2.79008	3.79934e-06	2.40715e-05
RGS4	5999	2.78734	6.63673e-16	4.70252e-14
MMP9	4318	2.77647	2.46525e-12	7.31387e-11
ORF69	HHV8GK18_gp78	2.76813	2.94942e-06	1.92607e-05
ORF59	HHV8GK18_gp70	2.75041	2.00469e-05	0.000105727
ORF46	HHV8GK18_gp50	2.74364	7.44017e-07	5.6164e-06
CSAG2	102723547	2.74311	1.37998e-05	7.56593e-05
ORF29	HHV8GK18_gp33	2.73996	5.34128e-05	0.000251764
NOS2	4843	2.73191	2.62431e-13	9.8247e-12
MMP11	4320	2.71987	2.32991e-19	4.65582e-17
ORF23	HHV8GK18_gp28	2.71357	0.000363606	0.00139093
ORF72	HHV8GK18_gp82	2.70701	2.33989e-05	0.000121339
ORF2	HHV8GK18_gp09	2.70417	7.27924e-06	4.269e-05
TMEM233	387890	2.68121	5.62043e-17	5.50692e-15
IL13RA2	3598	2.65418	1.86072e-07	1.62842e-06
ORF25	HHV8GK18_gp29	2.64021	0.000500337	0.00185568
LINC02687	399886	2.62913	1.28616e-05	7.09964e-05
TM4SF19	116211	2.6205	0.000290547	0.00114229
MIR3648-2	103504731	2.61506	5.71887e-07	4.44381e-06
MMP1	4312	2.61257	1.30082e-06	9.25894e-06
CREG2	200407	2.60853	3.16564e-10	5.49887e-09
CHST1	8534	2.60286	2.034e-19	4.18187e-17
ZP2	7783	2.60183	3.01175e-07	2.51728e-06
MIR5690	100847048	2.59615	0.000152242	0.000640182
DMBT1L1	375940	2.59035	5.66822e-05	0.000265303
LOXHD1	125336	2.56499	1.25397e-15	8.38759e-14
STC1	6781	2.56312	4.43809e-11	9.59362e-10
ORF17	HHV8GK18_gp20	2.55956	0.00182798	0.00582188
MEF2B	4207	2.55067	1.67684e-06	1.16478e-05
LINC01085	152742	2.543	2.45053e-10	4.36243e-09
UNC5A	90249	2.53491	4.97198e-13	1.74912e-11
UGT1A4	54657	2.51552	0.000184531	0.000758411
CXCL10	3627	2.50499	2.20668e-11	5.15025e-10
SPIC	121599	2.48619	4.47225e-06	2.78149e-05
LINC02408	100507175	2.47514	7.78874e-09	9.49295e-08
C3orf36	80111	2.47004	1.99274e-15	1.25588e-13
RNASE10	338879	2.427	0.00225956	0.00700315
IQCA1	79781	2.42599	5.1174e-09	6.55231e-08
ORF47	HHV8GK18_gp49	2.42366	5.3844e-05	0.00025358
MIR503	574506	2.41564	4.64953e-07	3.70588e-06
MIR6727	102465435	2.40713	0.000380228	0.00144767
K4.1	HHV8GK18_gp15	2.39833	0.00650843	0.0175087
GRIK3	2899	2.39794	8.61943e-12	2.26389e-10
BMP8A	353500	2.38624	8.95323e-30	7.4858e-26
DEFA1	1667	2.34398	0.0167083	0.0393737
ACAN	176	2.33644	1.63974e-07	1.45488e-06
ORF21	HHV8GK18_gp25	2.33258	0.00697253	0.0185621
UGT1A1	54658	2.3252	7.56124e-06	4.40862e-05
ARPIN-AP3S2	100526783	2.3177	1.2915e-05	7.12127e-05
SPINK9	643394	2.31747	0.00133085	0.0043987
GABRD	2563	2.30845	5.86915e-14	2.56921e-12
ORF67	HHV8GK18_gp74	2.30441	0.000118776	0.00051411
PCDH17	27253	2.2973	2.87263e-10	5.03876e-09
GRAPL	400581	2.28853	2.28054e-15	1.39519e-13
SALRNA2	104548973	2.28565	1.42646e-07	1.28474e-06
ORF68	HHV8GK18_gp77	2.27456	0.000205862	0.000837165
ORF64	HHV8GK18_gp72	2.27321	0.000783448	0.00275729
ORF60	HHV8GK18_gp67	2.25785	0.000431446	0.00162078
CSNK1G2-AS1	255193	2.21756	5.11187e-09	6.54857e-08
CLEC4M	10332	2.21699	0.000195599	0.000799576
KCNN1	3780	2.19521	1.33145e-08	1.54044e-07
FLT4	2324	2.19049	1.48193e-14	7.37524e-13
ARL14	80117	2.18929	1.45081e-05	7.91443e-05
MYLK2	85366	2.17806	1.89723e-09	2.68404e-08
LY6H	4062	2.17549	0.000143266	0.000605789
SPTA1	6708	2.17332	1.33642e-08	1.54476e-07
DSCAM	1826	2.16141	0.00159243	0.00514995
CNTNAP5	129684	2.13838	0.000714059	0.00253837
TMPRSS11A	339967	2.13719	4.04926e-05	0.000197065
MIR3186	100422944	2.13338	2.93923e-07	2.46241e-06
HRNR	388697	2.13334	9.31229e-05	0.000413562
KCNQ3	3786	2.13182	6.91955e-13	2.34545e-11
PALD1	27143	2.11853	2.38597e-32	5.98473e-28
SLC6A1-AS1	100874090	2.11758	7.43792e-07	5.6164e-06
ALPG	251	2.09953	0.00144873	0.00473776
NALF1	728215	2.09774	1.09949e-12	3.51768e-11
S100A7A	338324	2.09294	0.00451455	0.0127526
DAND5	199699	2.0924	5.08466e-09	6.5237e-08
LRRC3B	116135	2.08205	8.80277e-05	0.000393373
ZCCHC12	170261	2.08081	1.0761e-05	6.04654e-05
CSAG3	389903	2.07702	9.06343e-05	0.000403583
LINC01558	26238	2.07238	2.14999e-12	6.47398e-11
RPL17-C18orf32	100526842	2.07098	0.000222814	0.000898096
GPR45	11250	2.06482	8.62097e-09	1.04212e-07
OLR1	4973	2.06261	9.67449e-06	5.49763e-05
SCT	6343	2.05218	4.79576e-08	4.85832e-07
OAS2	4939	2.04382	1.9747e-17	2.24124e-15
MIR4479	100616480	2.03624	0.000959731	0.00329405
ADAMTS7	11173	2.03289	3.91142e-15	2.28163e-13
EPYC	1833	2.03002	0.00314518	0.00932842
CD177	57126	2.02625	0.00126815	0.00421814
ITPK1-AS1	319085	2.01936	4.15755e-05	0.000201709
SNORD48	26801	2.01919	0.00118781	0.0039814
ECEL1P2	347694	2.0177	0.00142589	0.00467281
OPCML	4978	2.00794	1.02316e-08	1.21803e-07
COL4A1	1282	2.006	2.25771e-13	8.64581e-12
NETO2	81831	2.00292	2.96736e-15	1.76794e-13
MIR5587	100847028	2.00227	4.79838e-08	4.85901e-07
ORF54	HHV8GK18_gp58	2.00215	0.00850126	0.0220674
SIGLEC12	89858	1.99681	5.15626e-06	3.15296e-05
ORF66	HHV8GK18_gp75	1.99675	0.000814182	0.00284986
TNR	7143	1.99465	0.00026145	0.00104061
UNC13A	23025	1.98608	1.20582e-10	2.33196e-09
ORF32	HHV8GK18_gp36	1.96285	0.00785272	0.0205971
EXOC3L1	283849	1.96285	3.22008e-28	1.34616e-24
MIR3176	100423037	1.96131	4.90766e-08	4.95368e-07
SDAD1-AS1	101928809	1.95969	1.59418e-05	8.60114e-05
FBXO39	162517	1.95891	1.01738e-13	4.25317e-12
EYA1	2138	1.95834	7.4451e-07	5.6164e-06
CDHR5	53841	1.95324	7.43221e-06	4.34322e-05
RASGRP3	25780	1.94289	8.74743e-14	3.71255e-12
MIR661	724031	1.9424	5.79408e-07	4.49808e-06
OAS3	4940	1.93495	5.63363e-13	1.96535e-11
CYP46A1	10858	1.92292	2.20546e-11	5.15025e-10
JMJD7-PLA2G4B	8681	1.92172	0.000284275	0.00112044
K14	HHV8GK18_gp83	1.92077	0.0087279	0.0225693
NRXN3	9369	1.92035	9.52096e-12	2.45441e-10
NME1-NME2	654364	1.90822	0.00209403	0.0065436
ART1	417	1.90723	3.72738e-06	2.36573e-05
ORF56	HHV8GK18_gp60	1.90531	0.00512022	0.0142258
HEYL	26508	1.88608	3.57556e-16	2.70954e-14
LINC01925	105376854	1.87455	0.00997622	0.0253093
SCN11A	11280	1.86554	1.85902e-05	9.88735e-05
KRT6A	3853	1.86115	0.000212581	0.000860442
EXOC3L2	90332	1.85638	6.30122e-22	2.98214e-19
CXCR4	7852	1.85279	2.5057e-09	3.4195e-08
SLC6A17	388662	1.85273	1.61091e-21	6.73443e-19
NFIA-AS2	100996570	1.8504	7.14842e-08	6.92025e-07
VASH1	22846	1.84625	3.40014e-21	1.2542e-18
ABCG4	64137	1.83868	2.80433e-11	6.34275e-10
KCNN3	3782	1.82772	1.93959e-13	7.578e-12
TMEM82	388595	1.82767	0.000847526	0.00295175
GPR142	350383	1.82487	8.05269e-06	4.65726e-05
BZW1-AS1	101927795	1.82438	3.70088e-05	0.000181768
GRASLND	386597	1.82424	1.12975e-12	3.60529e-11
LINC02538	401286	1.82358	1.29939e-07	1.18175e-06
PGF	5228	1.82193	3.50296e-20	9.15258e-18
SLC6A1	6529	1.82089	3.62501e-10	6.18967e-09
PROB1	389333	1.81313	1.46728e-22	8.0008e-20
COL4A2	1284	1.81307	5.11894e-13	1.79327e-11
LYPD1	116372	1.81092	3.67038e-10	6.2501e-09
ADAMTS14	140766	1.80833	1.66775e-12	5.1454e-11
BTBD17	388419	1.80408	4.73654e-05	0.00022673
TLX2	3196	1.80398	3.1211e-06	2.02298e-05
GRAP	10750	1.80076	1.37741e-13	5.53681e-12
GNA15-DT	100996351	1.80048	1.6386e-11	3.97496e-10
KCNN2	3781	1.79758	8.42555e-15	4.53023e-13
CFAP54	144535	1.79719	3.70861e-07	3.03204e-06
MIR6732	102465438	1.79321	1.01185e-05	5.71372e-05
KLHDC7B	113730	1.79249	2.01361e-07	1.75069e-06
TIE1	7075	1.78669	2.20377e-16	1.78313e-14
ANKRD34B	340120	1.77834	0.00127655	0.00423974
MIR4730	100616359	1.7748	3.44968e-06	2.21187e-05
CEMIP	57214	1.76375	7.65327e-06	4.44986e-05
FAM186A	121006	1.76273	2.96221e-06	1.93342e-05
SDS	10993	1.76	8.49687e-12	2.23403e-10
NEK10	152110	1.75898	1.36831e-09	2.00242e-08
RBM14-RBM4	100526737	1.75669	0.00422699	0.0120566
CXCL9	4283	1.75329	1.05725e-07	9.81098e-07
P4HA3	283208	1.75018	4.84443e-08	4.90047e-07
KBTBD11	9920	1.74991	2.15093e-13	8.26214e-12
DLL4	54567	1.74895	8.13935e-15	4.39052e-13
TBXA2R	6915	1.74722	7.29069e-12	1.9496e-10
PROX1	5629	1.74439	4.7755e-08	4.83975e-07
OPN5	221391	1.74402	0.000177973	0.000735074
ORF67A	HHV8GK18_gp73	1.74157	0.0114562	0.0284624
HMGA2	8091	1.74028	1.62985e-06	1.1356e-05
CALCRL	10203	1.7387	5.76886e-08	5.70585e-07
CHSY3	337876	1.73256	6.8853e-13	2.33815e-11
ADAM19	8728	1.72995	1.06141e-12	3.40889e-11
PCDH12	51294	1.72892	9.10483e-12	2.36414e-10
SLCO2A1	6578	1.72861	4.32054e-20	1.08372e-17
FMNL3	91010	1.72542	2.11506e-24	2.79222e-21
MTNR1B	4544	1.71717	0.00238553	0.00734278
CHRNA7	1139	1.71658	1.15087e-06	8.29997e-06
UGT1A3	54659	1.70388	0.00101667	0.0034667
UGT1A10	54575	1.70242	0.00929477	0.0238629
AGBL1	123624	1.69096	0.000208774	0.000847361
TMPRSS11D	9407	1.69029	0.00293251	0.00877864
FAM205A	259308	1.68452	2.72252e-06	1.79472e-05
LGALS9B	284194	1.67812	1.57912e-11	3.84553e-10
BCL6B	255877	1.67793	1.78432e-14	8.77572e-13
FILIP1	27145	1.67562	1.3572e-08	1.56446e-07
SEMA7A	8482	1.67175	2.16642e-10	3.90375e-09
HABP2	3026	1.67136	0.00018727	0.000768389
CXCL11	6373	1.66879	7.01815e-06	4.13403e-05
FCGR3B	2215	1.66723	4.10386e-12	1.16445e-10
FBN2	2201	1.66208	3.59467e-09	4.74803e-08
PRR29-AS1	400612	1.66161	3.51153e-08	3.66388e-07
PLEKHG7	440107	1.65678	2.43578e-05	0.000125661
CMPK2	129607	1.65671	3.42922e-09	4.55195e-08
CXCR5	643	1.65174	1.70286e-07	1.5045e-06
SLC5A4	6527	1.65023	3.64222e-11	8.00683e-10
RET	5979	1.65015	2.34899e-12	7.01426e-11
HS3ST3A1	9955	1.64746	2.32201e-18	3.52988e-16
CHRNA6	8973	1.64249	0.000596325	0.00216088
ENPEP	2028	1.63982	8.36633e-11	1.66947e-09
CDH26	60437	1.62951	1.32338e-16	1.1486e-14
OASL	8638	1.62907	3.19666e-07	2.65415e-06
MADD-AS1	101928943	1.61988	7.90964e-05	0.00035786
RUFY4	285180	1.61673	3.80273e-06	2.40869e-05
C19orf84	147646	1.61582	0.000455246	0.00170174
MIR663A	724033	1.61023	0.00682621	0.0182287
ISG15	9636	1.60193	5.17558e-05	0.000245358
MMP10	4319	1.60036	0.00204045	0.00640231
CHST15	51363	1.60016	8.8287e-22	3.95447e-19
vIRF-1	HHV8GK18_gp62	1.59939	0.0169824	0.039926
DYSF	8291	1.59913	3.56995e-12	1.02689e-10
KRT16	3868	1.59694	0.00346138	0.0101274
CHRFAM7A	89832	1.59321	7.84636e-09	9.55853e-08
BTBD19	149478	1.58623	7.661e-19	1.35325e-16
SLC22A13	9390	1.58527	5.28536e-05	0.00024962
FSCN1	6624	1.57808	9.53995e-21	3.06783e-18
PRRT1B	642515	1.57762	4.08373e-05	0.000198512
PGM2L1	283209	1.5776	2.51825e-11	5.77908e-10
ST6GAL2	84620	1.56728	4.52208e-05	0.000217544
SGIP1	84251	1.56708	3.70856e-10	6.30208e-09
AFAP1-AS1	84740	1.56559	1.28926e-09	1.89669e-08
XAF1	54739	1.56508	3.05955e-10	5.33677e-09
LINC01298	619344	1.56148	0.000366162	0.00139943
TMEM88B	643965	1.55761	4.87481e-05	0.000232241
MIR6739	102466724	1.5574	1.38696e-05	7.60087e-05
PTCHD4	442213	1.5499	4.18341e-05	0.000202729
MIR943	100126332	1.5488	3.23057e-05	0.000161419
F2RL2	2151	1.54827	2.49983e-09	3.41335e-08
CCNJL	79616	1.5454	8.85296e-17	8.13402e-15
GPRIN1	114787	1.53979	1.31247e-17	1.59037e-15
TNFAIP8L1	126282	1.53909	3.24607e-21	1.21524e-18
GPR4	2828	1.53907	4.55493e-11	9.83229e-10
MSANTD3-TMEFF1	100526694	1.53861	0.0175442	0.0410506
TRPC4	7223	1.53439	4.68987e-07	3.73447e-06
GIPC3	126326	1.53397	5.085e-12	1.4047e-10
MIR3619	100500828	1.53039	0.000124724	0.000536612
ADAMTS4	9507	1.52901	7.54963e-06	4.40316e-05
LZTS1	11178	1.52695	5.92127e-20	1.45611e-17
CCDC102B	79839	1.52692	4.93556e-10	8.08086e-09
ITGA9	3680	1.52654	8.72454e-11	1.73131e-09
SAMD14	201191	1.52607	1.62746e-12	5.03349e-11
HEY1	23462	1.52378	5.63393e-16	4.08427e-14
MIR4516	100616258	1.52111	1.82351e-05	9.71561e-05
VWA5B2	90113	1.51639	3.43562e-06	2.20454e-05
MIR4673	100616242	1.51127	0.000198799	0.000810941
THSD7A	221981	1.51019	1.42096e-08	1.63121e-07
PERCC1	105371045	1.50936	0.000649899	0.00233478
LOXL2	4017	1.50901	6.52729e-13	2.23057e-11
MIR3960	100616250	1.50574	0.0203266	0.0465065
POU5F2	134187	1.49903	5.69026e-05	0.000266087
ZACN	353174	1.49751	5.68808e-05	0.000266034
MIR4746	100616371	1.49664	6.37705e-05	0.00029436
SSUH2	51066	1.49436	1.20956e-09	1.79523e-08
HERC6	55008	1.49183	4.73956e-09	6.11535e-08
SCN9A	6335	1.49077	7.60164e-07	5.72032e-06
SH2D3C	10044	1.48719	2.93272e-16	2.26343e-14
AIRN	100271873	1.48561	7.97134e-05	0.000360196
TMEM255B	348013	1.48503	3.46783e-14	1.60783e-12
ODF3	113746	1.48258	0.00157825	0.00511001
NOS3	4846	1.47585	5.01624e-17	4.95364e-15
LANA	HHV8GK18_gp81	1.47565	0.000895651	0.00309742
GPR137C	283554	1.47381	6.77815e-09	8.38759e-08
CEMIP2	23670	1.46616	2.55547e-15	1.54306e-13
KRT6C	286887	1.46566	0.00890141	0.0229541
FJX1	24147	1.46554	2.24891e-19	4.58613e-17
MIR769	768217	1.46524	0.01403	0.033913
IFNL3	282617	1.46524	0.000614542	0.00221944
NR5A1	2516	1.45843	0.0077387	0.0203363
PCSK6	5046	1.45383	1.2614e-15	8.41482e-14
C4B	721	1.45148	1.47292e-09	2.13845e-08
MIR4674	100616301	1.45121	0.000104216	0.00045756
CACNG8	59283	1.44975	3.58571e-05	0.00017677
ANKRD18DP	348840	1.44946	0.00123882	0.00413264
HECW2	57520	1.44621	2.06757e-15	1.29007e-13
NOVA2	4858	1.44578	4.75318e-12	1.32031e-10
ITGA10	8515	1.44504	2.13014e-17	2.40619e-15
SPRY4	81848	1.44382	2.09365e-13	8.11668e-12
OVOL3	728361	1.43787	1.42206e-05	7.77453e-05
DUXB	100033411	1.43732	5.24467e-05	0.000248024
IFI6	2537	1.434	7.42119e-05	0.000337832
TP53I11	9537	1.43399	2.22656e-23	1.9946e-20
ZBTB46	140685	1.43287	1.88713e-18	2.95843e-16
LINC02915	400360	1.43151	0.000793506	0.002788
LEF1-AS1	641518	1.4298	3.26574e-08	3.43026e-07
RSAD2	91543	1.42704	9.32444e-06	5.31678e-05
DCSTAMP	81501	1.42629	0.00319524	0.00945342
KALRN	8997	1.42429	6.60213e-23	4.55215e-20
LINC01648	101929406	1.42292	0.0207926	0.0473783
MIR1281	100302237	1.41689	7.83136e-05	0.000354766
CGB8	94115	1.41565	0.00298892	0.00891734
KCNV2	169522	1.41447	2.32894e-06	1.56571e-05
NINL	22981	1.41305	3.76071e-13	1.35143e-11
PHOX2A	401	1.41137	0.0067882	0.0181542
DAZL	1618	1.41118	0.0025724	0.00784195
ARAP3	64411	1.41015	1.61376e-15	1.04056e-13
PLXDC1	57125	1.40941	2.46604e-12	7.31387e-11
UCKL1-AS1	100113386	1.4091	2.48903e-06	1.6622e-05
ERFE	151176	1.40813	0.000130851	0.000559806
MIR4656	100616465	1.40771	4.76633e-05	0.000227808
UNC5B	219699	1.40722	2.05296e-16	1.69949e-14
FBLIM1	54751	1.40503	7.09371e-23	4.56234e-20
PRKCQ-AS1	439949	1.40398	1.65034e-06	1.1486e-05
SCN3A	6328	1.40111	0.000176197	0.000728457
FAM83A-AS1	100131726	1.4011	0.00592576	0.0161368
TSPAN18	90139	1.40061	1.69075e-12	5.20356e-11
CD80	941	1.396	1.96979e-08	2.18717e-07
MIR3909	100500826	1.3949	0.000111693	0.000487234
OIT3	170392	1.393	0.000259181	0.0010324
LINC02159	285629	1.38816	1.92615e-06	1.31681e-05
TGM2	7052	1.38792	1.5611e-08	1.77987e-07
MIR4436B1	100616123	1.38743	0.00204697	0.00642041
RGS3	5998	1.38593	1.76535e-21	7.25906e-19
HOATZ	399949	1.38522	0.000934642	0.00321674
SALRNA3	104548972	1.38293	0.0102363	0.0258673
GPRIN3	285513	1.38188	1.89568e-06	1.2981e-05
HELZ2	85441	1.37937	1.0714e-10	2.09299e-09
CYP26C1	340665	1.37716	0.00107906	0.00365809
MIR499A	574501	1.3761	0.00239646	0.00737189
CEP295NL	100653515	1.37483	1.08942e-05	6.11183e-05
MIR6088	102464836	1.37467	0.00273943	0.00827769
TSPO2	222642	1.37354	2.93991e-05	0.000148374
LINC01775	101928602	1.37308	0.00193094	0.00610457
CD93	22918	1.37219	2.3474e-12	7.01426e-11
PLEKHG2	64857	1.37053	2.00891e-14	9.6903e-13
DISC1	27185	1.36945	4.01705e-07	3.25556e-06
MIR6845	102466748	1.36869	1.85517e-05	9.87131e-05
TRIM22	10346	1.36698	2.91903e-15	1.74745e-13
FGD5P1	100132526	1.36448	4.28906e-08	4.38575e-07
MIR1290	100302276	1.3595	0.0111897	0.0278885
SLC4A8	9498	1.35831	5.98397e-15	3.37294e-13
OR51E1	143503	1.35818	2.0205e-05	0.000106426
MIR3667HG	348645	1.358	1.6978e-08	1.91484e-07
LAMB1	3912	1.35524	5.19743e-27	1.45865e-23
SEMA6B	10501	1.35412	1.8628e-09	2.63831e-08
MIR3613	100500908	1.35187	0.00183968	0.00585221
CPNE5	57699	1.35156	1.20276e-10	2.32783e-09
SHROOM4	57477	1.34815	1.85402e-15	1.17139e-13
PXDN	7837	1.34602	8.34593e-08	7.92958e-07
FAM225A	286333	1.34465	1.73613e-10	3.20436e-09
NLRC5	84166	1.34398	6.97375e-23	4.56234e-20
PRR5L	79899	1.34315	1.24633e-13	5.07496e-12
MOBP	4336	1.34274	0.000196368	0.000802328
LGALS9C	654346	1.34166	1.96334e-06	1.33931e-05
SLC26A4	5172	1.33922	6.93871e-06	4.09611e-05
PARP14	54625	1.33797	4.2714e-19	7.93627e-17
INSR	3643	1.33502	2.87556e-18	4.16924e-16
GABRR2	2570	1.33313	1.42981e-07	1.28683e-06
CLDN14	23562	1.32869	0.00138058	0.00454152
MIR6815	102465489	1.3276	0.0146015	0.0351082
KBTBD11-AS1	101928058	1.32672	0.0021963	0.00682818
MIR26B	407017	1.32628	0.000437195	0.00164066
SNORD124	101340251	1.32484	8.00202e-05	0.000361453
MIR6511B2	102465985	1.32281	1.46985e-07	1.31908e-06
PTP4A3	11156	1.32111	2.53123e-09	3.44872e-08
LCE3E	353145	1.32075	0.00429731	0.0122391
ADAMTSL2	9719	1.31953	3.56463e-09	4.71332e-08
TSPEAR	54084	1.31876	0.000277298	0.00109656
SYT6	148281	1.31687	8.35755e-06	4.81692e-05
ELFN1	392617	1.31379	6.02567e-11	1.25429e-09
MIR4689	100616421	1.31279	0.0038904	0.0112267
MIR7854	102465840	1.31026	0.000271608	0.00107677
MIR6081	102466518	1.30973	0.000956061	0.0032828
MROH5	389690	1.30921	0.00204068	0.00640231
SYNPO2L	79933	1.30706	6.55645e-05	0.000302197
TGFB3	7043	1.30591	4.43021e-10	7.3689e-09
STRIP2	57464	1.30575	1.61304e-13	6.39947e-12
MIR4326	100422945	1.3053	0.000708174	0.00251959
MIR936	100126326	1.30409	0.00440443	0.0124987
CAVIN4	347273	1.30343	9.59482e-12	2.47091e-10
IFI44L	10964	1.30009	8.63205e-05	0.000386744
NID2	22795	1.29878	1.23999e-07	1.13348e-06
LINC01182	101929071	1.29758	0.00279681	0.00843033
MIR4748	100616425	1.29724	0.0196906	0.0452946
DYRK3	8444	1.29706	5.48481e-11	1.15513e-09
RFX8	731220	1.29667	1.15788e-08	1.35842e-07
SNORA5B	677795	1.2956	0.000162604	0.000679313
MIR4520-1	100616401	1.29481	0.00755725	0.01992
L1TD1	54596	1.29412	0.0019175	0.00606787
CD200	4345	1.29402	3.31671e-09	4.41342e-08
SCN3B	55800	1.29099	1.81808e-09	2.57935e-08
MIR3178	100422974	1.29032	0.00116658	0.00391928
MIR4635	100616479	1.28932	0.00146105	0.00477307
RAI1-AS1	100861516	1.28923	0.000313821	0.00122153
LINC01993	100996291	1.28559	0.00816435	0.0213208
LAYN	143903	1.28556	2.15721e-08	2.37426e-07
LINC00839	84856	1.27926	1.62554e-09	2.33525e-08
KCNJ2	3759	1.27626	7.97432e-12	2.11214e-10
SAMD9	54809	1.27598	1.1648e-09	1.73495e-08
MARCKSL1	65108	1.27492	1.06218e-14	5.50466e-13
MAGED4	728239	1.27395	1.61732e-08	1.83562e-07
TAS2R3	50831	1.27393	0.0114774	0.0285123
MIR6766	102466983	1.27232	0.00357703	0.0104232
PODXL	5420	1.26992	5.32983e-12	1.46749e-10
PHC2-AS1	101929464	1.26908	0.000779072	0.00274305
MIR6889	102466758	1.26829	0.00657114	0.0176584
TUBA3D	113457	1.2673	1.33085e-08	1.54044e-07
FAM106A	80039	1.26538	0.00155815	0.00505016
TMEM52B	120939	1.26527	0.0045048	0.0127335
CNTNAP2	26047	1.2647	0.0137982	0.0334533
TMEM26	219623	1.26427	0.000207088	0.000841606
KLHL3	26249	1.26199	2.95543e-15	1.76503e-13
C4A	720	1.25838	7.52471e-08	7.25374e-07
MIR4505	100616158	1.25734	0.000585859	0.00212757
MYO1B	4430	1.25575	1.2141e-12	3.85973e-11
SCARF1	8578	1.25523	2.07558e-14	9.97353e-13
IFI44	10561	1.25389	2.91969e-08	3.10974e-07
LINC02912	641384	1.25322	0.00859113	0.0222592
TRANK1	9881	1.2528	8.05673e-18	1.04168e-15
MIR3125	100422986	1.25278	0.00333634	0.00981072
TMEM92	162461	1.25174	2.95785e-08	3.14505e-07
IQCA1L	392843	1.25165	0.00528393	0.0145998
RASL10A	10633	1.251	5.21548e-08	5.22236e-07
DCHS2	54798	1.24924	0.000381517	0.00145192
LIMS4	100288695	1.24842	2.9206e-16	2.26103e-14
ADAM12	8038	1.24814	1.14516e-06	8.26353e-06
NRP2	8828	1.24801	3.06798e-09	4.1086e-08
MIR6859-3	102465910	1.24723	0.000686479	0.00245319
MIRLET7G	406890	1.24614	0.00108363	0.00367157
TBX10	347853	1.2454	0.0106256	0.0267029
BMP8B	656	1.24337	2.30516e-10	4.13297e-09
MMP13	4322	1.24271	0.00630496	0.0170307
SULF2	55959	1.24231	1.0348e-18	1.76571e-16
NIBAN3	199786	1.2397	1.53638e-06	1.07829e-05
RNF213	57674	1.23871	2.64588e-18	3.88109e-16
TBX2	6909	1.23819	3.10858e-07	2.59045e-06
SH2B3	10019	1.23692	2.96115e-14	1.38572e-12
CASP4LP	643733	1.23558	2.02275e-06	1.37609e-05
MIR6736	102466191	1.23298	0.00960601	0.0245396
CDYL2	124359	1.23172	5.75729e-16	4.16168e-14
MIR6756	102465453	1.23152	0.00666258	0.0178735
MIR6814	102465488	1.22984	0.00203312	0.00638338
C20orf204	284739	1.22984	5.67182e-11	1.19051e-09
CCDC92B	101928991	1.22784	0.00229962	0.0071045
NID1	4811	1.22676	9.89398e-08	9.23666e-07
ETS1	2113	1.22492	3.78021e-11	8.28838e-10
RHOJ	57381	1.22372	4.83165e-12	1.33914e-10
CYP2C19	1557	1.22282	0.00696178	0.0185413
NAT8	9027	1.22207	0.00351577	0.0102637
HAPLN3	145864	1.22066	7.00352e-12	1.87882e-10
PRAG1	157285	1.22047	1.56186e-17	1.83066e-15
AIM2	9447	1.21996	4.51672e-07	3.6092e-06
MAGED4B	81557	1.21974	9.01937e-08	8.50819e-07
SLC41A1	254428	1.21896	6.57233e-15	3.67158e-13
COL18A1	80781	1.21512	3.64844e-13	1.31674e-11
MIR6837	102466985	1.21489	0.000512729	0.00189408
MIR6804	102465482	1.21416	0.00430447	0.0122514
EPSTI1	94240	1.2141	8.50032e-10	1.29929e-08
BRINP1	1620	1.21363	0.000438684	0.00164575
KIF21B	23046	1.21351	1.54683e-09	2.2324e-08
POSTN	10631	1.21347	7.75046e-06	4.50011e-05
SH3TC1	54436	1.21305	1.73613e-09	2.47569e-08
SELE	6401	1.21257	0.000803722	0.00281955
DUXAP8	503637	1.21173	0.000739624	0.00261738
GAU1	101929549	1.21113	1.51912e-05	8.23874e-05
GBP1	2633	1.2111	1.50955e-12	4.68614e-11
KIF26B	55083	1.2099	4.55129e-19	8.33285e-17
INSRR	3645	1.20796	0.000341468	0.00131811
MIR6758	102465454	1.20755	0.000105502	0.000462802
MIR6769A	102466731	1.20652	0.00162295	0.00523985
WSCD1	23302	1.20508	3.76638e-07	3.07126e-06
MIR3138	100423011	1.19797	0.0032503	0.00959595
EPHA8	2046	1.19719	0.00399994	0.0115071
ALPK3	57538	1.19613	1.51085e-06	1.06198e-05
LRRN2	10446	1.19553	0.000103447	0.000454505
FER1L6	654463	1.19197	0.00756432	0.0199323
PPM1F	9647	1.19074	3.75738e-18	5.17837e-16
AFAP1L1	134265	1.19063	2.76352e-08	2.96481e-07
HMOX1	3162	1.19012	5.17457e-07	4.07387e-06
SLC35G6	643664	1.18944	0.00262408	0.0079772
MIR4525	100616196	1.1856	0.00713392	0.0189335
CHRDL2	25884	1.1829	0.00180516	0.00576507
MIR4645	100616285	1.18243	0.00806797	0.0210933
GCM2	9247	1.17975	0.00489189	0.0136732
MIR2278	100313780	1.17952	0.00283299	0.00851732
MX1	4599	1.17827	0.000100616	0.000443308
MIR4784	100616378	1.17764	0.000401248	0.00151894
ADAMTS9	56999	1.17696	4.27434e-10	7.13804e-09
SV2A	9900	1.17589	2.71812e-08	2.9211e-07
MUC6	4588	1.17558	0.0179341	0.0418069
C3orf80	401097	1.17517	1.70195e-05	9.13743e-05
MIR7112	102465906	1.17439	0.0112106	0.0279351
GBP1P1	400759	1.17365	5.83579e-13	2.03022e-11
PIF1	80119	1.17133	7.225e-10	1.13692e-08
CDH5	1003	1.1694	2.83971e-08	3.03488e-07
SHANK3	85358	1.16936	1.07026e-09	1.6008e-08
MIR7161	102465694	1.16841	0.00125426	0.00417691
NOTCH1	4851	1.1673	6.15551e-19	1.09503e-16
ACOT11	26027	1.16621	2.20931e-11	5.15025e-10
KDR	3791	1.16508	3.24503e-08	3.41136e-07
PAM16	51025	1.1635	0.000556102	0.00203393
GP9	2815	1.16116	0.0182774	0.0425047
MARCKS	4082	1.16049	1.00459e-17	1.27078e-15
IL24	11009	1.15838	0.00128994	0.00427926
MIR3605	100500853	1.15689	0.000698831	0.00249059
NTRK1	4914	1.15589	0.00015581	0.000653542
TNFRSF4	7293	1.15518	8.45178e-06	4.86564e-05
COL11A1	1301	1.15517	0.00935173	0.0239944
GLIS3	169792	1.15476	6.57962e-11	1.35387e-09
MIR6870	102465525	1.1546	0.0128878	0.0315135
TEP1	7011	1.15417	1.74945e-26	3.98923e-23
S1PR3	1903	1.15407	7.87225e-11	1.58387e-09
HSPG2	3339	1.15166	1.22704e-09	1.81718e-08
IFIH1	64135	1.15066	2.40155e-11	5.54679e-10
RSPH6A	81492	1.15064	0.00604984	0.0164336
XIRP1	165904	1.15049	0.000535014	0.00196886
TRIM10	10107	1.15047	0.015654	0.0372532
ZFR2	23217	1.15026	0.000969655	0.00332211
PCGF3-AS1	100129917	1.1497	1.53085e-07	1.37136e-06
NUCB1-AS1	100874085	1.14913	0.000144427	0.000610184
CETP	1071	1.149	8.70628e-07	6.43542e-06
EHD3	30845	1.1472	1.25315e-18	2.10957e-16
LINC01929	101927229	1.14648	0.0121604	0.0299508
CCDC105	126402	1.14638	0.00242437	0.00744771
RBM12B-AS1	55472	1.14352	2.4597e-08	2.67433e-07
DOCK6	57572	1.14277	3.87276e-17	3.96492e-15
MIR760	100126348	1.14201	0.0115538	0.0286509
MIR6809	102465485	1.13894	0.00645448	0.0173766
COL15A1	1306	1.13821	1.05862e-07	9.8164e-07
GJC1	10052	1.13806	1.20092e-08	1.40171e-07
NHSL2	340527	1.13769	1.4903e-11	3.65764e-10
STK32B	55351	1.13622	1.71755e-07	1.51588e-06
PNP	4860	1.13577	5.10543e-11	1.08802e-09
SAMD11	148398	1.13548	3.72936e-06	2.36639e-05
SNORD37	26812	1.13547	0.00524226	0.0145006
TMEM204	79652	1.13509	8.91026e-13	2.90632e-11
NOTCH4	4855	1.13343	2.56967e-08	2.77464e-07
RUVBL1-AS1	100874089	1.13334	0.00679869	0.0181725
SNORD11	692058	1.13303	0.00232396	0.00717261
TSPAN11	441631	1.13297	4.40561e-08	4.4976e-07
KIF3C	3797	1.13287	6.89991e-15	3.83748e-13
IGFBP7	3490	1.13274	2.80297e-10	4.93035e-09
CXCL13	10563	1.13241	0.00668741	0.0179267
MIR6884	102466757	1.1313	0.00332678	0.00978831
MIR4701	100616262	1.12684	0.00390219	0.0112595
MIR1180	100302256	1.12507	0.00386076	0.0111541
DOK3	79930	1.12281	1.91085e-10	3.47569e-09
[truncated: 9,458 more rows]

## Sheet: 6-C3vsC4
	entrez	log2FoldChange	pvalue	padj
[truncated: 1,252 more rows]
